# Supplementary material for: Bitcoin and Global Climate Change: Emissions Beyond Borders
Source: Research Square preprint supplement (doi:10.21203/rs.3.rs-564281/v1), 2021-06-22
Supplement: Supplementary file 1 [file 2e515ed3a8e0e619bc0cc8a6.pdf]

# **Bitcoin and Global Climate Change: Emissions beyond borders**

**Supplementary documents**

# PLAN

**01** Extract Bitcoin Data

**02** Estimation of the energy consumption of Bitcoin

**03** Estimation of carbon footprint for electricity generation by sector

**04** Carbon Footprint for Electricity Generation of the Bitcoin-mining countries

# PLAN

- 05** Estimation of Carbon Footprint of Bitcoin Equipment
- 06** Estimation of Carbon Footprint of Bitcoin energy consumption by country
- 07** Carbon Footprint of Bitcoin Mining by country

# **Estimation the Carbon Footprint of Bitcoin**

# Chapter 1

## Extract Data

**Related Folder : Document-2020\Chaptre-1\N1-Extract-Data**

## Extract Data

# Steps :

1- Write python script that download the data related to the bitcoin mined blocks

```
import json
import requests
import datetime
import pandas as pd
from pandas.io.json import json_normalize

api_url = 'https://chain.api.btc.com/v3/block/date/'

# required to prevent the request from being blocked by the API
headers = {'User-Agent': 'Mozilla/5.0 (Macintosh; Intel Mac OS X 10_11_5)'
           ' AppleWebKit/537.36 (KHTML, like Gecko) '
           'Chrome/50.0.2661.102 Safari/537.36'}

blocks = []
start_year = 2018
end_year = 2018
start_date = datetime.date(start_year, 1, 1)
end_date = datetime.date(end_year, 12, 31)
n_days = 1 + (end_date - start_date).days

for offset in range(n_days):
    # prepare the url for the day start_date + offset
    date = start_date + datetime.timedelta(days=offset)
    url = '{}{}'.format(api_url, date.strftime('%Y%m%d'))

    # send a request to the API
    response = requests.get(url, headers=headers)
    if not response.ok:
        exit('The request for day #{} failed with error code {} ({}).'.format(offset+1,
                                                                                response.status_code,
                                                                                response.reason))

    response_data = json.loads(response.text)

    # append the results to the blocks list
    blocks.append(response_data['data'])
```

Usage

Here you can get help or by pressing Ctrl+I in front of the Editor or the Console.

Help can also be shown after writing a left parenthesis. You can activate behavior in Preferences

New to Spyder? Read

Variable explorer Help

Console 1/A

Finished the first 109 days.  
Finished the first 119 days.  
Finished the first 129 days.  
Finished the first 139 days.  
Finished the first 149 days.  
Finished the first 159 days.  
Finished the first 169 days.  
Finished the first 179 days.  
Finished the first 189 days.  
Finished the first 199 days.  
Finished the first 209 days.  
Finished the first 219 days.  
Finished the first 229 days.  
Finished the first 239 days.  
Finished the first 249 days.  
Finished the first 259 days.  
Finished the first 269 days.  
Finished the first 279 days.

The Script download the following Information :

height, version, mrkl\_root, timestamp, bits, nonce, hash, prev\_block\_hash, next\_block\_hash, size, pool\_difficulty, difficulty, tx\_count, reward\_block, reward\_fees, created\_at, confirmations, is\_orphan, curr\_max\_timestamp, is\_sw\_block, stripped\_size, weight, Mining\_pool, miningpool\_url

## Extract Data

# Result :

All information related to the Bitcoin mined block are downloaded for the following years:

- 2015
- 2016
- 2017
- 2018
- 2019
- 2020

|    | A  | B      | C        | D         | E         | F        | G        | H                           | I          | J          | K        | L         | M          | N          | O        | P        | Q        | R         | S         | T        |
|----|----|--------|----------|-----------|-----------|----------|----------|-----------------------------|------------|------------|----------|-----------|------------|------------|----------|----------|----------|-----------|-----------|----------|
| 1  |    | height | version  | mrkl_root | timestamp | bits     | nonce    | hash                        | prev_block | next_block | size     | pool_diff | difficulty | difficulty | tx_count | reward_b | reward_f | confirmat | is_orphan | curr_max |
| 2  | 0  | 501961 | 5.37E+08 | 5d9afd1ac | 1.51E+09  | 4.03E+08 | 3.02E+09 | 00000000C00000000C00000000C | 1058225    | 1.06E+13   | 1.87E+12 | 1.87E+12  | 2533       | 1.25E+09   | 4.75E+08 | 162460   | FALSE    | 1.51E+09  |           |          |
| 3  | 1  | 501962 | 5.37E+08 | 5b175e89  | 1.51E+09  | 4.03E+08 | 1.83E+09 | 00000000C00000000C00000000C | 1066956    | 3E+12      | 1.87E+12 | 1.87E+12  | 2420       | 1.25E+09   | 3.86E+08 | 162459   | FALSE    | 1.51E+09  |           |          |
| 4  | 2  | 501963 | 5.37E+08 | f6efc8a8c | 1.51E+09  | 4.03E+08 | 3.34E+09 | 00000000C00000000C00000000C | 1033629    | 3.34E+12   | 1.87E+12 | 1.87E+12  | 2014       | 1.25E+09   | 1.36E+08 | 162458   | FALSE    | 1.51E+09  |           |          |
| 5  | 3  | 501964 | 5.37E+08 | bb0ef6d4  | 1.51E+09  | 4.03E+08 | 2.51E+09 | 00000000C00000000C00000000C | 1041595    | 2.97E+12   | 1.87E+12 | 1.87E+12  | 1189       | 1.25E+09   | 2.06E+08 | 162457   | FALSE    | 1.51E+09  |           |          |
| 6  | 4  | 501965 | 5.37E+08 | b34ac9e4  | 1.51E+09  | 4.03E+08 | 64781884 | 00000000C00000000C00000000C | 1032120    | 6.3E+12    | 1.87E+12 | 1.87E+12  | 2004       | 1.25E+09   | 2.63E+08 | 162456   | FALSE    | 1.51E+09  |           |          |
| 7  | 5  | 501966 | 5.37E+08 | 4e885b99  | 1.51E+09  | 4.03E+08 | 7.74E+08 | 00000000C00000000C00000000C | 1393545    | 2.29E+12   | 1.87E+12 | 1.87E+12  | 788        | 1.25E+09   | 1.18E+08 | 162455   | FALSE    | 1.51E+09  |           |          |
| 8  | 6  | 501967 | 5.37E+08 | fb5bfed9  | 1.51E+09  | 4.03E+08 | 1.56E+09 | 00000000C00000000C00000000C | 1221060    | 6.76E+12   | 1.87E+12 | 1.87E+12  | 1452       | 1.25E+09   | 1.74E+08 | 162454   | FALSE    | 1.51E+09  |           |          |
| 9  | 7  | 501968 | 5.37E+08 | 9e2e84eb  | 1.51E+09  | 4.03E+08 | 3.32E+09 | 00000000C00000000C00000000C | 1035988    | 1.94E+12   | 1.87E+12 | 1.87E+12  | 1939       | 1.25E+09   | 4.09E+08 | 162453   | FALSE    | 1.51E+09  |           |          |
| 10 | 8  | 501969 | 5.37E+08 | b8817a33  | 1.51E+09  | 4.03E+08 | 3.38E+09 | 00000000C00000000C00000000C | 1071174    | 5.62E+13   | 1.87E+12 | 1.87E+12  | 2529       | 1.25E+09   | 4.5E+08  | 162452   | FALSE    | 1.51E+09  |           |          |
| 11 | 9  | 501970 | 5.37E+08 | 4e29b1f3  | 1.51E+09  | 4.03E+08 | 1.42E+09 | 00000000C00000000C00000000C | 999297     | 2.56E+12   | 1.87E+12 | 1.87E+12  | 1033       | 1.25E+09   | 62146018 | 162451   | FALSE    | 1.51E+09  |           |          |
| 12 | 10 | 501971 | 5.37E+08 | 5c7a09074 | 1.51E+09  | 4.03E+08 | 3.94E+09 | 00000000C00000000C00000000C | 1044488    | 3.91E+12   | 1.87E+12 | 1.87E+12  | 2739       | 1.25E+09   | 5.69E+08 | 162450   | FALSE    | 1.51E+09  |           |          |
| 13 | 11 | 501972 | 5.37E+08 | 397fd026f | 1.51E+09  | 4.03E+08 | 1.46E+09 | 00000000C00000000C00000000C | 1257962    | 1.11E+13   | 1.87E+12 | 1.87E+12  | 1703       | 1.25E+09   | 2.73E+08 | 162449   | FALSE    | 1.51E+09  |           |          |
| 14 | 12 | 501973 | 5.37E+08 | c9a7f7562 | 1.51E+09  | 4.03E+08 | 1.53E+09 | 00000000C00000000C00000000C | 1484305    | 3.72E+12   | 1.87E+12 | 1.87E+12  | 813        | 1.25E+09   | 1.09E+08 | 162448   | FALSE    | 1.51E+09  |           |          |
| 15 | 13 | 501974 | 5.37E+08 | eb191de3  | 1.51E+09  | 4.03E+08 | 2.84E+09 | 00000000C00000000C00000000C | 1036036    | 3.91E+12   | 1.87E+12 | 1.87E+12  | 2118       | 1.25E+09   | 4.03E+08 | 162447   | FALSE    | 1.51E+09  |           |          |
| 16 | 14 | 501975 | 5.37E+08 | 3b3dbf02  | 1.51E+09  | 4.03E+08 | 8.41E+08 | 00000000C00000000C00000000C | 1007588    | 8.73E+12   | 1.87E+12 | 1.87E+12  | 1050       | 1.25E+09   | 70462819 | 162446   | FALSE    | 1.51E+09  |           |          |
| 17 | 15 | 501976 | 5.37E+08 | 7750b049  | 1.51E+09  | 4.03E+08 | 2.95E+09 | 00000000C00000000C00000000C | 1056895    | 2.49E+12   | 1.87E+12 | 1.87E+12  | 2371       | 1.25E+09   | 4.84E+08 | 162445   | FALSE    | 1.51E+09  |           |          |
| 18 | 16 | 501977 | 5.37E+08 | ee912d39  | 1.51E+09  | 4.03E+08 | 6.52E+08 | 00000000C00000000C00000000C | 1051809    | 1.08E+13   | 1.87E+12 | 1.87E+12  | 2029       | 1.25E+09   | 3.58E+08 | 162444   | FALSE    | 1.51E+09  |           |          |
| 19 | 17 | 501978 | 5.37E+08 | 3abc35b81 | 1.51E+09  | 4.03E+08 | 1.1E+09  | 00000000C00000000C00000000C | 1021842    | 3.65E+12   | 1.87E+12 | 1.87E+12  | 1529       | 1.25E+09   | 1.6E+08  | 162443   | FALSE    | 1.51E+09  |           |          |

# Chapter 2

## Estimation the energy consumption of Bitcoin

Related Folder : Document-2020\Chaptre-1\N2-EnergyConsumptionOfCountries



## References :

1- **randi21.csv** database listing the processors currently used for mining.

The types of equipment included in the model are taken from Bendiksen et al.<sup>23</sup> 79.9% of the miners modeled are Antminer S9, 7.6% Avalon 821, 6.7% Ebang E10, and the remaining 5.8% are modeled as other machines. Details on the methodology used to derive these values are provided in SI Section 4.

| Mining_Hardware | Hash_Rate(Ghash/s) | Consumption(GJ/s) | Energy_Efficiency(Mhash/J) |
|-----------------|--------------------|-------------------|----------------------------|
| AntMiner S9     | 14000              | 0.000001375       | 10448                      |
| Avalon821       | 11000              | 0.0000012         | 9167                       |
| Ebit E10        | 18000              | 0.00000162        | 11111                      |

-Bendiksen, C.; Gibbons, S.; Lim, E. The Bitcoin Mining Network - Trends, Marginal Creation Cost, Electricity Consumption & Sources. Coin Shares Research & Three Body Capital; 2018.

- Köhler, Susanne, and Massimo Pizzol. "Life Cycle Assessment of Bitcoin Mining." Environmental Science & Technology 53.23 (2019): 13598-13606.

# Estimation the energy consumption of Bitcoin

## References :

1- **Katie\_TableS2** list of companies doing mining and the CO<sub>2</sub>e emissions of electricity generation in their claimed countries.

| Mining_p   | Known_S     | CO2e/GW | Carbon/G | Mining_pool_website                                                     |
|------------|-------------|---------|----------|-------------------------------------------------------------------------|
| 1Hash      | China       | 661.73  | 180.4554 | <a href="http://www.1hash.com/">http://www.1hash.com/</a>               |
| AntPool    | China       | 661.73  | 180.4554 | <a href="https://antpool.com">https://antpool.com</a>                   |
| BATPOOL    | China       | 661.73  | 180.4554 | <a href="https://www.batpool.com/">https://www.batpool.com/</a>         |
| BCMonste   | U.S., China | 580.04  | 158.1783 | <a href="http://www.bcmonster.com/">http://www.bcmonster.com/</a>       |
| BitClub N  | U.S.        | 498.34  | 135.8986 | <a href="https://bitclubnetwork.com">https://bitclubnetwork.com</a>     |
| Bitcoin.co | Global      | 573.86  | 156.493  | <a href="https://pool.bitcoin.com">https://pool.bitcoin.com</a>         |
| Bitfury    | Georgia, F  | 132.6   | 36.16035 | <a href="http://www.bitfury.org/">http://www.bitfury.org/</a>           |
| BitMinter  | U.S., E.U.  | 414.46  | 113.0243 | <a href="https://bitminter.com">https://bitminter.com</a>               |
| BTC.com    | China       | 661.73  | 180.4554 | <a href="https://pool.btc.com">https://pool.btc.com</a>                 |
| BTC.TOP    | China       | 661.73  | 180.4554 | <a href="http://btc.top/">http://btc.top/</a>                           |
| BTCC       | China       | 661.73  | 180.4554 | <a href="https://pool.btcc.com/">https://pool.btcc.com/</a>             |
| BW Pool    | China       | 661.73  | 180.4554 | <a href="https://www.bw.com">https://www.bw.com</a>                     |
| Canoe Po   | U.S.        | 498.34  | 135.8986 | <a href="https://www.canoepool.com">https://www.canoepool.com</a>       |
| ConnectB   | China       | 661.73  | 180.4554 | <a href="https://www.connectbtc.com/#">https://www.connectbtc.com/#</a> |

Mora, Camilo, et al. "Bitcoin emissions alone could push global warming above 2 C." *Nature Climate Change* 8.11 (2018): 931-933.

## Steps :

### 1- Load Required Data :

- Load database containing all blocks mined in 2020
- Load database listing the processors currently used for mining
- Load list of companies doing mining and the CO2e emissions of electricity generation in their claimed countries

### 2- Process loaded Data :

- Convert units from giga hashes to hashes
- Convert units Megahashes per joule to hashes per J
- Estimate total number of hashes

# Steps :

### **3- Calculate Carbon emissions of electricity generation in the countries of Bitcoin mining companies:**

- Select a list of processors equal o the number of blocks
- estimate total Jules of the block
- estimate carbon emissions from the given block in Ggtons of Carbon.

### **4- Displays Results:**

- Energy Per Hashes Per country (WattHour/MegaHashes)
- Mean emissions per country
- Percentage Mean emissions per country
- Standard deviation for emissions per country
- Mean energy consumption per country
- Standard deviation for energy consumption per country

## Estimation the energy consumption of Bitcoin

### Result : Example 2019

```
EnergyPerHashes (WattHour/MegaHashes)
EnergyPerHashes
```

| Country | EnergyPerHashes |
|---------|-----------------|
| China   | 0.000730536     |
| E.U.    | 0.000000178     |
| Finland | 0.000017931     |
| Georgia | 0.000017931     |
| Global  | 0.000132849     |
| Iceland | 0.000017931     |
| U.S.    | 0.000116497     |

```
Mean emissions per country:
```

| Country | Emission     |
|---------|--------------|
| China   | 18.042357967 |
| E.U.    | 0.002682788  |
| Finland | 0.090838396  |
| Georgia | 0.090838396  |
| Global  | 2.664090573  |
| Iceland | 0.090838396  |
| U.S.    | 2.554859602  |

```
-----
23.536506118046262
```

```
% Mean emissions per country:
```

| Country | Emission     |
|---------|--------------|
| China   | 76.656908532 |
| E.U.    | 0.011398413  |
| Finland | 0.385946817  |
| Georgia | 0.385946817  |
| Global  | 11.318972152 |
| Iceland | 0.385946817  |
| U.S.    | 10.854880453 |

```
-----
Standard deviation
```

```
for emissions per country:
```

| Country | Emission    |
|---------|-------------|
| China   | 0.009162960 |
| E.U.    | 0.000061578 |
| Finland | 0.000171951 |
| Georgia | 0.000171951 |
| Global  | 0.003346370 |
| Iceland | 0.000171951 |
| U.S.    | 0.002323361 |

```
The mean and standard
deviation of the CO2
emissions across the
1000 iterations are:
```

```
23.536506118046262
+- 0.010592336369146816
```

```
Mean energy consumption per country:
```

| Country | Emission     |
|---------|--------------|
| China   | 27.724506618 |
| E.U.    | 0.006467681  |
| Finland | 0.684495786  |
| Georgia | 0.684495786  |
| Global  | 4.638610187  |
| Iceland | 0.684495786  |
| U.S.    | 4.484380871  |

```
Standard deviation
```

```
for energy consumption
per country:
```

| Country | Emission    |
|---------|-------------|
| China   | 0.013955473 |
| E.U.    | 0.000148453 |
| Finland | 0.001295708 |
| Georgia | 0.001295708 |
| Global  | 0.005826569 |
| Iceland | 0.001295708 |
| U.S.    | 0.004084777 |

```
The mean and standard
deviation of the energy
consumption across
the 1000 iterations
```

```
are: 38.90745271604894
+- 0.01714837350473813
```

## Estimation the energy consumption of Bitcoin

### Result :

| Years | Energy consumption TWh |
|-------|------------------------|
| 2015  | 0.152092               |
| 2016  | 1.228189               |
| 2017  | 4.976362               |
| 2018  | 22.46275               |
| 2019  | 38.90745               |
| 2020  | 55.57515               |

### Estimation the energy consumption

De Vries, A. 22–67 TWh/yr (mid-March 2018)

Köhler, Susanne, and Massimo Pizzol  
31,29 TWh/yr (mid-March 2018)

43 TWh/ yr (October 2018)

TWh/yr (November 2018)

6452 TWh/yr (average of 2018)

39–83 TWh/yr (mid-November 2018)

105.82 TWh/yr (29 July 2018).

## Estimation the energy consumption of Bitcoin

### Result :

| %    | China  | Finland | Georgia | Iceland | India | Sweden | U.S    | Global |
|------|--------|---------|---------|---------|-------|--------|--------|--------|
| 2015 | 59.75  | 4.53    | 4.53    | 4.53    | -     | -      | 19.47  | 6.71   |
| 2016 | 64.27  | 3.27    | 3.27    | 3.27    | 1.267 | 0.39   | 15.29  | 8.86   |
| 2017 | 71.89  | 1.89    | 1.89    | 1.89    | 2.52  | -      | 9.45   | 10.23  |
| 2018 | 70.24  | 0.9     | 0.9     | 0.9     | 0.28  | -      | 9.39   | 17.35  |
| 2019 | 71.25  | 1.76    | 1.76    | 1.76    | -     | -      | 11.52  | 11.92  |
| 2020 | 75.945 | 0.27321 | 0.27321 | 0.27321 | -     | -      | 16.112 | 7.122  |

# Chapter 3

## Estimation of carbon footprint for electricity generation by sector

Related Folder : Document-2020\Chaptre-2\N1-MRIO-LCSAModel



## Estimation of carbon footprint for electricity generation by sector

## Steps :

we calculate the carbon footprint impacts of the regional and international supply chains. A Python programming language was used to carry out all matrix operations of big matrix data and sectorial multipliers for ten energy sources

[illegible]

# Estimation of carbon footprint for electricity generation by sector

## Result :

Screenshot of the part generated file that contains greenhouse gas emissions caused by electricity generation in China (The table involves all the global supply-chain sectors involved electricity generation in China)

| Abreviation | Sector                   | CO2 - combustion - air(air-kg) | CH4 - combustion - air(air-kg) | N2O - combustion - air(air-kg) |
|-------------|--------------------------|--------------------------------|--------------------------------|--------------------------------|
| CN          | Electricity by coal      | 24118847.76                    | 255.7464318                    | 841.3677882                    |
| CN          | Other Bituminous C       | 262125.0284                    | 4.337452792                    | 8.155646963                    |
| CN          | Basic iron and steel     | 81923.84043                    | 12.45610171                    | 0.477637363                    |
| CN          | Steam and hot water      | 24828.79037                    | 0.495026713                    | 0.839828438                    |
| CN          | Other non-metallic       | 11248.44819                    | 0.248067262                    | 0.162817433                    |
| CN          | Coke Oven Coke           | 10052.67771                    | 1.659153646                    | 0.249724094                    |
| CN          | Rubber and plastic       | 9672.216859                    | 1.008277706                    | 0.01398232                     |
| CN          | Air transport service    | 7025.701142                    | 0.161808632                    | 0.273299967                    |
| CN          | Chemicals nec            | 5966.967248                    | 0.644660034                    | 0.07700643                     |
| CN          | Coking Coal              | 5480.276696                    | 0.090683597                    | 0.170510997                    |
| RU          | Other Bituminous C       | 5399.188529                    | 0.074845764                    | 0.08306013                     |
| CN          | Other business services  | 5211.830486                    | 0.851275328                    | 0.048797387                    |
| CN          | Supporting and auxiliary | 5151.508507                    | 0.598559199                    | 0.086737968                    |
| CN          | Sea and coastal water    | 4886.710154                    | 0.444831238                    | 0.017808327                    |
| CN          | Crude petroleum and      | 4851.92831                     | 1.374437205                    | 0.025146993                    |
| ID          | Sub-Bituminous Coal      | 4345.455751                    | 0.045461989                    | 0.067515718                    |
| CN          | Inland water transport   | 3813.756388                    | 0.356606836                    | 0.070066695                    |
| CN          | Electricity by gas       | 3557.976173                    | 1.944614425                    | 0.006345521                    |
| CN          | Railway transport        | 3538.292057                    | 0.202735213                    | 0.068570079                    |

# Chapter 4

## Carbon Footprint for Electricity Generation of the Bitcoin-mining countries

Related Folder : Document-2020\Chaptre-2\N2-EstimationtheC.F.P.ElectricityCountry

# **Carbon Footprint for Electricity Generation of the Bitcoin-mining countries Footprint for Electricity Generation by country**

## **CHINA**

**Chapter 2 / N2-EstimationtheC.F.P.Bitcoin / China**

# Carbon Footprint for Electricity Generation by country

## Steps :

| Source of electricity | Electricity generation (%) |
|-----------------------|----------------------------|
| Coal                  | 64.6%                      |
| Hydro                 | 16.90%                     |
| Wind                  | 5.40%                      |
| Nuclear               | 4.60%                      |
| Natural gas           | 3.30%                      |
| Solar                 | 3%                         |
| Biomass               | 1.40%                      |
| Pumped storage hydro  | 0.40%                      |
| Other thermal         | 0.30%                      |

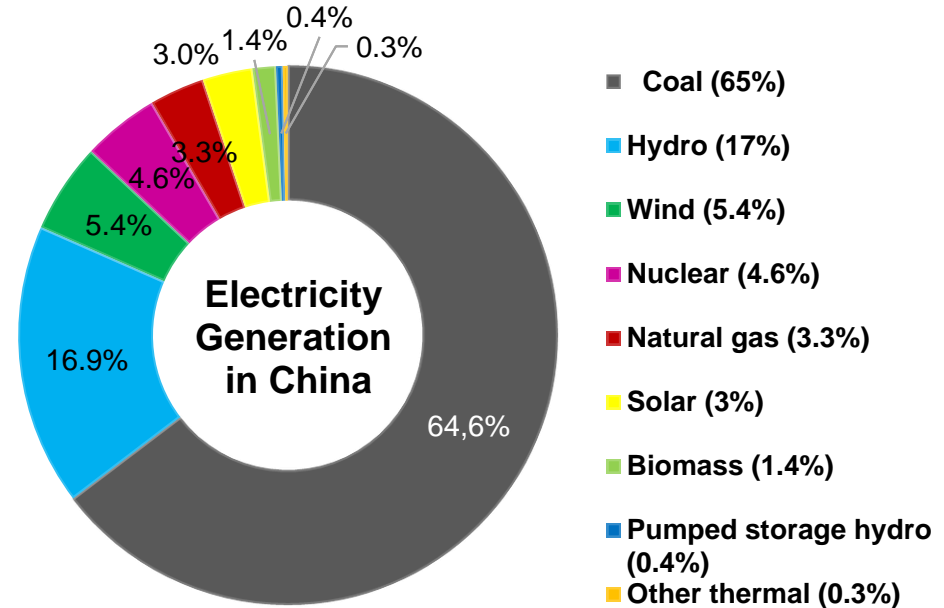

# Steps :

## China Price Electricity :

| Des /Country  | India | China | USA   | Finland | Sweden | Iceland | Georgia |
|---------------|-------|-------|-------|---------|--------|---------|---------|
| Price In Euro | 0.02  | 0.05  | 0.075 | 0.144   | 0.128  | 0.088   | 0.04    |
| Value         | 0.868 | 0.813 | 0.647 | 0.365   | 0.016  | 0.017   | 0.08    |

## Carbon Footprint for Electricity Generation by country

### Steps :

**Total** =  $0,64 \times \text{Coal} + 0,031 \times \text{Natural gas} + 0,042 \times \text{Nuclear} + 0,171 \times \text{Hydro} + 0,052 \times \text{Wind} + 0,025 \times \text{Solar} + 0,013 \times \text{Biomass}$

**Carbon Footprint** = Total  $\times$  Cost 1 kWh

**Carbon Footprint** =  $0.81 \text{ kgCO}_2/\text{kWh}$

## Carbon Footprint for Electricity Generation by country

# Result : China Carbon Footprint by Sector

| Abbreviation | Sector     | al Tax (M. | ensation(M | ng Surplus | oyment(10 | p hours(M | CO2 - combustion - air(air-kg) |
|--------------|------------|------------|------------|------------|-----------|-----------|--------------------------------|
| AT           | Paddy rice | 0          | 0          | 0          | 0         | 0         | 0                              |
| AT           | Wheat      | -3.6E-16   | 1.17E-15   | 1.39E-14   | 5.18E-16  | 1.34E-15  | 8.2256E-09                     |
| AT           | Cereal gra | -8.9E-16   | 2.53E-15   | 3.55E-14   | 1.13E-15  | 2.91E-15  | 2.00117E-08                    |
| AT           | Vegetable  | -2.1E-15   | 3.56E-15   | 5.14E-14   | 1.58E-15  | 4.09E-15  | 2.6701E-09                     |
| AT           | Oil seeds  | -6.9E-16   | 6.17E-16   | 1.89E-14   | 2.74E-16  | 7.08E-16  | 4.33516E-10                    |
| AT           | Sugar cane | -2.5E-16   | 6.51E-16   | 7.67E-15   | 2.82E-16  | 7.29E-16  | 3.7411E-11                     |
| AT           | Plant-base | -1.2E-19   | 2.27E-19   | 5.91E-17   | 1.01E-19  | 2.6E-19   | 1.71912E-12                    |
| AT           | Crops nec  | -7.7E-17   | 2.24E-16   | 2.94E-15   | 9.97E-17  | 2.58E-16  | 1.66604E-09                    |
| AT           | Cattle     | -1.7E-14   | 3.01E-15   | 1.47E-14   | 1.34E-15  | 3.46E-15  | 5.24876E-09                    |
| AT           | Pigs       | 2.33E-16   | 3.19E-15   | 2.7E-14    | 1.42E-15  | 3.66E-15  | 4.43742E-10                    |
| AT           | Poultry    | 7.84E-17   | 1.08E-15   | 1.46E-14   | 4.78E-16  | 1.24E-15  | 5.85882E-10                    |
| AT           | Meat anim  | -7.9E-16   | 2.22E-16   | 1.44E-15   | 9.87E-17  | 2.55E-16  | 3.03034E-10                    |
| AT           | Animal pr  | -8E-16     | 1.89E-16   | 1.14E-15   | 8.39E-17  | 2.17E-16  | 2.74429E-10                    |
| AT           | Raw milk   | -2.4E-15   | 5.93E-15   | 5.1E-14    | 2.63E-15  | 6.81E-15  | 5.78725E-09                    |
| AT           | Wool, silk | -5E-19     | 2.42E-20   | 4.32E-19   | 1.08E-20  | 2.79E-20  | 3.39299E-11                    |
| AT           | Manure (c  | 0          | 0          | 0          | 0         | 0         | 0                              |
| AT           | Manure (k  | 0          | 0          | 0          | 0         | 0         | 0                              |



## Carbon Footprint for Electricity Generation by country

# Result : China Carbon Footprint by Country

| Abreviation | Total Tax | Compensation | Operating | Employment | Emp hour | CO2 - combustion - | CH4 - com | N2O - com |
|-------------|-----------|--------------|-----------|------------|----------|--------------------|-----------|-----------|
| AT          | 2.14E-12  | 1.96E-11     | 1.56E-11  | 4.94E-13   | 8.36E-13 | 6.07278E-06        | 1.8E-09   | 1.73E-10  |
| BE          | 2.81E-12  | 3.1E-11      | 2.41E-11  | 6.54E-13   | 1.07E-12 | 2.52414E-05        | 6.27E-09  | 3.7E-10   |
| BG          | 3.58E-13  | 1.87E-12     | 2.68E-12  | 2.85E-13   | 6.04E-13 | 1.69226E-06        | 3.86E-10  | 3.6E-11   |
| CY          | 6.22E-14  | 1.14E-12     | 1.07E-12  | 6.89E-14   | 1.45E-13 | 1.73632E-06        | 1.4E-10   | 1.26E-11  |
| CZ          | 8.32E-13  | 7.95E-12     | 8.67E-12  | 5.15E-13   | 9.34E-13 | 1.0253E-05         | 1.17E-09  | 2.99E-10  |
| DE          | 2.05E-11  | 3.59E-10     | 1.88E-10  | 8.48E-12   | 1.17E-11 | 0.000252989        | 3.32E-08  | 4.12E-09  |
| DK          | 3.17E-12  | 2.38E-11     | 1.16E-11  | 4.15E-13   | 7.66E-13 | 2.51418E-05        | 2.9E-09   | 3.47E-10  |
| EE          | 3.15E-13  | 1.5E-12      | 1.88E-12  | 1.01E-13   | 2.1E-13  | 2.07974E-06        | 3.48E-10  | 6.37E-11  |
| ES          | 5.3E-12   | 4.98E-11     | 4.65E-11  | 1.71E-12   | 3.44E-12 | 4.55414E-05        | 5.6E-09   | 1.35E-09  |
| FI          | 1.37E-12  | 1.58E-11     | 1.16E-11  | 3.54E-13   | 6.75E-13 | 8.99767E-06        | 1.2E-09   | 3.96E-10  |
| FR          | 1.82E-11  | 1.52E-10     | 6.6E-11   | 3.01E-12   | 4.6E-12  | 6.47679E-05        | 7.22E-09  | 1.83E-09  |
| GR          | 8.21E-13  | 3.9E-12      | 6.86E-12  | 2.35E-13   | 5.35E-13 | 2.46091E-05        | 2.3E-09   | 1.34E-10  |
| HR          | 3.01E-13  | 2.58E-12     | 1.49E-12  | 1.22E-13   | 2.55E-13 | 2.06653E-06        | 7.48E-10  | 2.78E-11  |
| HU          | 1.39E-12  | 7.63E-12     | 6.12E-12  | 5.33E-13   | 1.11E-12 | 5.80651E-06        | 2.85E-09  | 1.16E-10  |
| IE          | 3.92E-12  | 2.68E-11     | 2.22E-11  | 6.65E-13   | 1.19E-12 | 1.70429E-05        | 1.51E-09  | 6.01E-10  |
| IT          | 1.22E-11  | 5.69E-11     | 3.26E-11  | 1.45E-12   | 2.87E-12 | 3.13687E-05        | 7.24E-09  | 6.11E-10  |
| LT          | 1.01E-13  | 1.56E-12     | 2.6E-12   | 1.34E-13   | 2.76E-13 | 1.15718E-06        | 3.64E-10  | 1.78E-11  |

# Chapter 5

## Estimation of Carbon Footprint of Bitcoin Equipment

Related Folder : Document-2020\Chaptre-2\N3-CarbonFootprintofBitcoinEquipment

# Estimation of Carbon Footprint of Bitcoin Equipment

## Steps :

*List of Bitcoin processing hardware and their electricity consumption*

| Mining Hardware | Percentage | Hash Rate (Ghash/s) | Consumption (GWh) |
|-----------------|------------|---------------------|-------------------|
| AntMiner S9     | 79.9 %     | 14,000              | 1.38E-06          |
| Avalon821       | 7.6. %     | 11,000              | 1.2E-06           |
| Ebit E10        | 6.7%       | 18,000              | 1.62E-06          |
| Others          | 5.8 %      | 23,260              | 1.83E-06          |

## Estimation of Carbon Footprint of Bitcoin Equipment

### Steps :

|             | Average Hashrate<br>(TH/s) | Number Equipment | Value (M. USD) |
|-------------|----------------------------|------------------|----------------|
| <b>2015</b> | 405341                     | 28,453.4         | 33.44          |
| <b>2016</b> | 1,532,974                  | 107,609.0        | 126.45         |
| <b>2017</b> | 6,306,453                  | 442,689.6        | 520.21         |
| <b>2018</b> | 36,403,242                 | 2,555,372.6      | 3,002.86       |
| <b>2019</b> | 67,023,852                 | 4,704,825.9      | 5,528.72       |
| <b>2020</b> | 119,864,038                | 8,414,011.1      | 9,887.44       |

## Estimation of Carbon Footprint of Bitcoin Equipment

### Result : Carbon Footprint of Mining Equipment

| Years | Carbon Footprint of Mining Equipment<br>Per Transaction (KgCO <sub>2</sub> ) | Total Carbon Footprint of Mining Equipment (MTCO <sub>2</sub> )<br>Per year |
|-------|------------------------------------------------------------------------------|-----------------------------------------------------------------------------|
| 2015  | 0.50                                                                         | 0.02288                                                                     |
| 2016  | 1.09                                                                         | 0.08934                                                                     |
| 2017  | 3.11                                                                         | 0.32184                                                                     |
| 2018  | 23.84                                                                        | 1.947067                                                                    |
| 2019  | 30.50                                                                        | 3.661283                                                                    |
| 2020  | 53.36                                                                        | 6.006096                                                                    |

# Chapter 6

## Estimation of Carbon Footprint of Bitcoin energy consumption by country

Related Folder : Document-2020\Chaptre-2\N4-CarbonFootprintofEnergyconsumptionOfBitcoin

## Carbon Footprint of Bitcoin by country (Document : Result-1)

### Steps :

**The number of transactions mined per year (Example 2019) :**

| Date     | Number of transaction | Total Number of Transaction<br>per year |
|----------|-----------------------|-----------------------------------------|
| 1/2/2020 | 489274895             | 120034648                               |
| 1/1/2019 | 369240247             |                                         |

## Carbon Footprint of Bitcoin by country (Document : Result-1)

### Steps :

#### Average energy consumption per transaction:

$$AECTr_{i,t} = \frac{EC_{i,t}}{Tr_{i,t}}$$

Where,  $AECTr_{i,t}$  is annual electricity consumption per transaction in country  $i$  in year  $t$ .  $EC_{i,t}$  is the total annual electricity consumption for bitcoin mining country  $i$  in year  $t$ .  $Tr_{i,t}$  is total annual number transaction in country  $i$  in year  $t$ .

The average energy consumption per transaction for 2019 as follows:

$$AECTr_{total,2019} = 120034648 / 38.90745272$$

$$AECTr_{total,2019} = 3.24135E-07 \text{ (TWH) per transaction}$$

$$AECTr_{total,2019} = 324.14 \text{ (kWh) per transaction}$$



## Carbon Footprint of Bitcoin by country (Document : Result-1)

### Steps :

#### Average energy consumption per transaction:

$$AECTr_{i,t} = \frac{EC_{i,t}}{Tr_{i,t}}$$

Where,  $AECTr_{i,t}$  is annual electricity consumption per transaction in country  $i$  in year  $t$ .  $EC_{i,t}$  is the total annual electricity consumption for bitcoin mining country  $i$  in year  $t$ .  $Tr_{i,t}$  is total annual number transaction in country  $i$  in year  $t$ .

The average energy consumption per transaction for 2019 as follows:

$$AECTr_{total,2019} = 120034648 / 38.90745272$$

$$AECTr_{total,2019} = 3.24135E-07 \text{ (TWH) per transaction}$$

$$AECTr_{total,2019} = 324.14 \text{ (kWh) per transaction}$$

## Carbon Footprint of Bitcoin by country (Document : Result-1)

### Steps :

**Average number of transactions mined per country:**

$$ANTr_{i,t} = Tr_{i,t} \times MPr_{i,t}$$

Where,  $ANTr_{i,t}$  is average number of transactions mined in country  $i$  in year  $t$ .  $Tr_{i,t}$  is total annual number transaction mined in country  $i$  in year  $t$ .  $MPr_{i,t}$  is the mining percentage in country  $i$  in year  $t$ .

For example, we calculated the average number of transactions mined in 2019 in China as follows:

$$ANTr_{China,2019} = 120,034,648 * 0.72 = 85533777.22 \text{ Transaction}$$

## Carbon Footprint of Bitcoin by country (Document : Result-1)

### Steps :

#### Annual Carbon footprint of Bitcoin energy consumption per country per transaction

$$AFECBMTr_{i,t} = AECTr_{i,t} \times GWP100_{e,i}$$

Where  $AFECBMTr_{i,t}$  is annual carbon footprint from electricity generation consumption per transaction of the bitcoin-mining in country  $i$  in year  $t$  per transaction per kWh.  $AECTr_{i,t}$  is annual electricity consumption per transaction in country  $i$  in year  $t$ .  $GWP100_{e,i}$  is GWP100 of electricity generation  $e$  in country  $i$ .

As an example, the annual carbon footprint of Bitcoin energy consumption per transaction mined in China for 2019:

$AFECBMTr_{China,2019} = 324.1351839 \times 0.813166656 = 263.5759237$  (kWh) per transaction

## Carbon Footprint of Bitcoin by country (Document : Result-1)

### Steps :

#### Annual Footprint of electricity needed for mining Bitcoin per Country

$$AFECBM_{i,t} = AFEGBMTr_{i,t} \times Tr_{i,t}$$

Where  $AFECBM_{i,t}$  annual carbon footprint from electricity consumption of the bitcoin-mining in country  $i$  in year  $t$  per kWh.  $AFEGBMTr_{i,t}$  is annual carbon footprint from electricity generation of the bitcoin-mining in country  $i$  in year  $t$  per transaction.  $Tr_{i,t}$  is total annual number transaction in country  $i$  in year  $t$

For example, we calculated the average number of transactions mined in China in 2019 as follows:

$$\begin{aligned} AFECBM_{China,2019} &= 85533777.22 * 263.5759237 \\ &= 22544644334.45 \text{ kWh} \end{aligned}$$

## Global Warming Potential per kWh of electricity generation

### Result :

| Des /Country | India    | China    | USA      | Finland  | Georgia  |
|--------------|----------|----------|----------|----------|----------|
| Value        | 0.868103 | 0.813167 | 0.647817 | 0.365052 | 0.080715 |

| Des /Country | Iceland  | Sweden      |
|--------------|----------|-------------|
| Value        | 0.017168 | 0.016335747 |

# Carbon Footprint of Bitcoin energy consumption by country

## Result :

| Countries             | Total GWP per year (MtCO <sub>2</sub> -eqv.) |         |         |          |          |          |
|-----------------------|----------------------------------------------|---------|---------|----------|----------|----------|
|                       | 2015                                         | 2016    | 2017    | 2018     | 2019     | 2020     |
| <b>China</b>          | 0.13561                                      | 0.64899 | 2.94105 | 12.97205 | 22.79232 | 34.69843 |
| <b>U.S.</b>           | 0.03512                                      | 0.12270 | 0.30717 | 1.37899  | 2.92891  | 5.84839  |
| <b>Unknown server</b> | 0.00880                                      | 0.05170 | 0.24183 | 1.85170  | 2.20334  | 1.88017  |
| <b>Finland</b>        | 0.00476                                      | 0.01526 | 0.03581 | 0.07724  | 0.26006  | 0.05769  |
| <b>Georgia</b>        | 0.00104                                      | 0.00334 | 0.00783 | 0.01690  | 0.05690  | 0.01262  |
| <b>Iceland</b>        | 0.00022                                      | 0.00070 | 0.00164 | 0.00353  | 0.01188  | 0.00263  |
| <b>India</b>          | 0.00000                                      | 0.01373 | 0.11098 | 0.05530  | 0.00000  | 0.00000  |
| <b>Sweden</b>         | 0.00000                                      | 0.00008 | 0.00017 | 0.00000  | 0.00000  | 0.00000  |
| <b>Total</b>          | 0.1855                                       | 0.8427  | 3.5353  | 16.3004  | 28.2534  | 42.4999  |

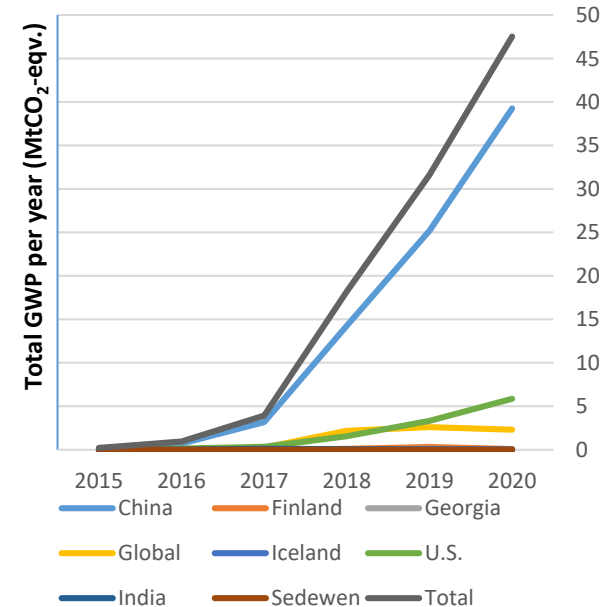

# Carbon Footprint of Bitcoin energy consumption by country

## Result :

| Countries             | GWP per transaction per year (kgCO <sub>2</sub> -eqv.) |        |        |         |         |         |
|-----------------------|--------------------------------------------------------|--------|--------|---------|---------|---------|
|                       | 2015                                                   | 2016   | 2017   | 2018    | 2019    | 2020    |
| <b>China</b>          | 5.005                                                  | 12.318 | 39.492 | 226.071 | 266.472 | 405.930 |
| <b>U.S.</b>           | 3.976                                                  | 9.787  | 31.375 | 179.607 | 211.704 | 322.500 |
| <b>Unknown server</b> | 2.892                                                  | 7.117  | 22.818 | 130.621 | 153.964 | 234.542 |
| <b>Finland</b>        | 2.313                                                  | 5.693  | 18.251 | 104.479 | 123.150 | 187.601 |
| <b>Georgia</b>        | 0.506                                                  | 1.246  | 3.993  | 22.860  | 26.945  | 41.047  |
| <b>Iceland</b>        | 0.106                                                  | 0.260  | 0.834  | 4.772   | 5.625   | 8.569   |
| <b>India</b>          | 0.000                                                  | 13.219 | 42.379 | 242.598 | 0.000   | 0.000   |
| <b>Sweden</b>         | 0.000                                                  | 0.259  | 0.831  | 0.000   | 0.000   | 0.000   |

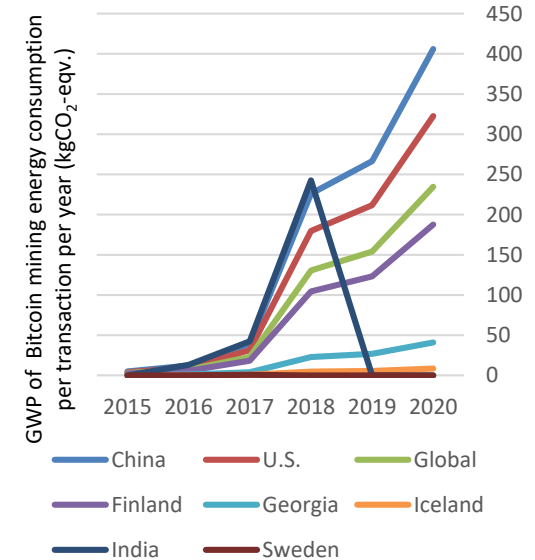

## Carbon Footprint of Bitcoin energy consumption by country

**Result :** Example China by Country

| Order | Country Code | P.A.D.* (%) | GWP per transaction per year (kgCO <sub>2</sub> -eqv.) |            |            |           |           |          |
|-------|--------------|-------------|--------------------------------------------------------|------------|------------|-----------|-----------|----------|
|       |              |             | 2020                                                   | 2019       | 2018       | 2017      | 2016      | 2015     |
| 1     | CN           | 99.391%     | 403.456760                                             | 264.848098 | 224.693283 | 39.251060 | 12.243238 | 4.974400 |
| 2     | WA           | 0.093%      | 0.378787                                               | 0.248654   | 0.210954   | 0.036851  | 0.011495  | 0.004670 |
| 3     | US           | 0.092%      | 0.371707                                               | 0.244006   | 0.207011   | 0.036162  | 0.011280  | 0.004583 |
| 4     | RU           | 0.077%      | 0.314406                                               | 0.206391   | 0.175099   | 0.030588  | 0.009541  | 0.003876 |
| 5     | WM           | 0.042%      | 0.171322                                               | 0.112464   | 0.095413   | 0.016667  | 0.005199  | 0.002112 |
| 6     | JP           | 0.037%      | 0.149740                                               | 0.098297   | 0.083393   | 0.014568  | 0.004544  | 0.001846 |
| 7     | KR           | 0.037%      | 0.149300                                               | 0.098008   | 0.083148   | 0.014525  | 0.004531  | 0.001841 |
| 8     | ID           | 0.035%      | 0.141601                                               | 0.092954   | 0.078861   | 0.013776  | 0.004297  | 0.001746 |
| 9     | DE           | 0.031%      | 0.125893                                               | 0.082642   | 0.070113   | 0.012248  | 0.003820  | 0.001552 |
| 10    | WL           | 0.025%      | 0.101351                                               | 0.066532   | 0.056445   | 0.009860  | 0.003076  | 0.001250 |



## Carbon Footprint of Bitcoin energy consumption by country

### Result : Example China by sector

| Order | Country Code | Sector                                                                          | P.A.D.* (%) | GWP per transaction per year (kgCO <sub>2</sub> -eqv.) |            |            |           |           |          |
|-------|--------------|---------------------------------------------------------------------------------|-------------|--------------------------------------------------------|------------|------------|-----------|-----------|----------|
|       |              |                                                                                 |             | 2020                                                   | 2019       | 2018       | 2017      | 2016      | 2015     |
| 1     | CN           | Electricity by coal                                                             | 95.260%     | 386.689357                                             | 253.841181 | 215.355175 | 37.619811 | 11.734417 | 4.767667 |
| 2     | CN           | Electricity by gas                                                              | 1.861%      | 7.552507                                               | 4.957823   | 4.206145   | 0.7347600 | 0.229187  | 0.093118 |
| 3     | CN           | Other Bituminous Coal                                                           | 1.039%      | 4.218519                                               | 2.769235   | 2.349379   | 0.4104066 | 0.128015  | 0.052012 |
| 4     | CN           | Basic iron and steel and of ferro-alloys and first products thereof             | 0.386%      | 1.567937                                               | 1.029268   | 0.873216   | 0.1525397 | 0.047580  | 0.019332 |
| 5     | CN           | Steam and hot water supply services                                             | 0.119%      | 0.482845                                               | 0.316962   | 0.268906   | 0.0469745 | 0.014652  | 0.005953 |
| 6     | CN           | Other non-metallic mineral products                                             | 0.058%      | 0.236244                                               | 0.155082   | 0.131569   | 0.0229834 | 0.007169  | 0.002913 |
| 7     | CN           | Rubber and plastic products (25)                                                | 0.046%      | 0.185159                                               | 0.121547   | 0.103119   | 0.018013  | 0.005619  | 0.002283 |
| 8     | CN           | Coke Oven Coke                                                                  | 0.042%      | 0.171680                                               | 0.112699   | 0.095612   | 0.016702  | 0.005210  | 0.002117 |
| 9     | CN           | Air transport services (62)                                                     | 0.039%      | 0.158272                                               | 0.103897   | 0.088145   | 0.015397  | 0.004803  | 0.001951 |
| 10    | WA           | Natural gas and services related to natural gas extraction, excluding surveying | 0.032%      | 0.129924                                               | 0.085288   | 0.072357   | 0.0126399 | 0.003943  | 0.001602 |

# Chapter 7

## Estimation of Carbon Footprint of Bitcoin Mining

## Carbon Footprint of Bitcoin by country

**Results :** Carbon Footprint of Bitcoin Mining = Carbon Footprint of Bitcoin energy consumption + Carbon Footprint of Bitcoin equipment

| Countries      | Total GWP per year (MtCO <sub>2</sub> -eqv.) |        |        |         |         |         |
|----------------|----------------------------------------------|--------|--------|---------|---------|---------|
|                | 2015                                         | 2016   | 2017   | 2018    | 2019    | 2020    |
| China          | 0.1477                                       | 0.6983 | 3.1682 | 14.2531 | 25.1848 | 39.2586 |
| U.S.           | 0.0391                                       | 0.1344 | 0.3369 | 1.5504  | 3.3159  | 6.815   |
| Unknown server | 0.0102                                       | 0.0585 | 0.2418 | 2.1682  | 2.6036  | 2.3078  |
| Finland        | 0.0057                                       | 0.0178 | 0.0418 | 0.0937  | 0.3192  | 0.0741  |
| Georgia        | 0.0020                                       | 0.0059 | 0.0138 | 0.0334  | 0.1160  | 0.0290  |
| Iceland        | 0.0011                                       | 0.0032 | 0.0076 | 0.0200  | 0.0710  | 0.0164  |
| India          | 0.0000                                       | 0.0147 | 0.1190 | 0.0604  | 0.0000  | 0.0000  |
| Sweden         | 0.0000                                       | 0.0004 | 0.0008 | 0.0000  | 0.0000  | 0.0000  |
| Total          | 0.2058                                       | 0.9332 | 3.9299 | 18.1792 | 31.6105 | 48.5343 |

## Carbon Footprint of Bitcoin by country

**Results :** Carbon Footprint of Bitcoin Mining = Carbon Footprint of Bitcoin energy consumption + Carbon Footprint of Bitcoin equipment

| Countries      | GWP per transaction per year (kgCO <sub>2</sub> -eqv.) |        |        |         |         |         |
|----------------|--------------------------------------------------------|--------|--------|---------|---------|---------|
|                | 2015                                                   | 2016   | 2017   | 2018    | 2019    | 2020    |
| China          | 5.453                                                  | 13.255 | 42.541 | 248.396 | 294.443 | 459.279 |
| U.S.           | 4.424                                                  | 10.723 | 34.408 | 201.932 | 239.676 | 375.849 |
| Unknown server | 3.340                                                  | 8.054  | 25.635 | 152.946 | 181.936 | 287.888 |
| Finland        | 2.761                                                  | 6.630  | 21.301 | 126.804 | 151.134 | 240.949 |
| Georgia        | 0.954                                                  | 2.182  | 7.043  | 45.185  | 54.929  | 94.395  |
| Iceland        | 0.553                                                  | 1.197  | 3.883  | 27.097  | 33.608  | 53.348  |
| India          | 0.000                                                  | 14.156 | 45.429 | 264.924 | 0.000   | 0.000   |
| Sweden         | 0.000                                                  | 1.196  | 3.881  | 0.000   | 0.000   | 0.000   |

## Carbon Footprint of Bitcoin by country

# Result : Example China by Country

| Order | GWP per transaction per year (kgCO <sub>2</sub> -eqv.) |             |         |      |             |         |      |             |         |      |             |                       |      |             |                       |      |             |                       |
|-------|--------------------------------------------------------|-------------|---------|------|-------------|---------|------|-------------|---------|------|-------------|-----------------------|------|-------------|-----------------------|------|-------------|-----------------------|
|       | 2020                                                   |             |         | 2019 |             |         | 2018 |             |         | 2017 |             |                       | 2016 |             |                       | 2015 |             |                       |
|       | C.C.                                                   | P.A.D.* (%) | GWP     | C.C. | P.A.D.* (%) | GWP     | C.C. | P.A.D.* (%) | GWP     | C.C. | P.A.D.* (%) | GWP                   | C.C. | P.A.D.* (%) | GWP                   | C.C. | P.A.D.* (%) | GWP                   |
| 1     | CN                                                     | 98.35%      | 451.676 | CN   | 98.54%      | 290.130 | CN   | 98.58%      | 244.872 | CN   | 98.75%      | 42.007                | CN   | 90.38%      | 8.58 10 <sup>-1</sup> | CN   | 98.65%      | 5.379                 |
| 2     | WA                                                     | 0.24%       | 1.100   | WA   | 0.21%       | 0.627   | WA   | 0.21%       | 0.513   | WA   | 0.18%       | 7.81 10 <sup>-2</sup> | JP   | 1.45%       | 1.74 10 <sup>-1</sup> | WA   | 0.20%       | 1.07 10 <sup>-2</sup> |
| 3     | JP                                                     | 0.20%       | 0.923   | US   | 0.18%       | 0.533   | US   | 0.18%       | 0.437   | US   | 0.16%       | 6.76 10 <sup>-2</sup> | WA   | 1.35%       | 2.58 10 <sup>-2</sup> | US   | 0.17%       | 9.20 10 <sup>-3</sup> |
| 4     | US                                                     | 0.20%       | 0.922   | JP   | 0.17%       | 0.504   | JP   | 0.16%       | 0.407   | JP   | 0.14%       | 5.88 10 <sup>-2</sup> | KR   | 1.12%       | 2.12 10 <sup>-2</sup> | JP   | 0.15%       | 8.33 10 <sup>-3</sup> |
| 5     | KR                                                     | 0.16%       | 0.745   | KR   | 0.14%       | 0.410   | KR   | 0.13%       | 0.332   | KR   | 0.11%       | 4.86 10 <sup>-2</sup> | US   | 1.03%       | 1.76 10 <sup>-2</sup> | KR   | 0.13%       | 6.84 10 <sup>-3</sup> |
| 6     | WM                                                     | 0.16%       | 0.715   | WM   | 0.14%       | 0.398   | WM   | 0.13%       | 0.323   | WM   | 0.11%       | 4.78 10 <sup>-2</sup> | WM   | 1.02%       | 1.44 10 <sup>-2</sup> | WM   | 0.12%       | 6.68 10 <sup>-3</sup> |
| 7     | RU                                                     | 0.13%       | 0.578   | RU   | 0.12%       | 0.345   | RU   | 0.12%       | 0.285   | RU   | 0.11%       | 4.57 10 <sup>-2</sup> | DE   | 0.68%       | 1.43 10 <sup>-2</sup> | RU   | 0.11%       | 6.09 10 <sup>-3</sup> |
| 8     | DE                                                     | 0.11%       | 0.489   | DE   | 0.09%       | 0.273   | DE   | 0.09%       | 0.222   | DE   | 0.08%       | 3.30 10 <sup>-2</sup> | RU   | 0.49%       | 1.21 10 <sup>-2</sup> | DE   | 0.08%       | 4.60 10 <sup>-3</sup> |
| 9     | ID                                                     | 0.06%       | 0.272   | ID   | 0.06%       | 0.162   | ID   | 0.05%       | 0.134   | ID   | 0.05%       | 2.13 10 <sup>-2</sup> | IN   | 0.31%       | 9.31 10 <sup>-3</sup> | ID   | 0.05%       | 2.84 10 <sup>-3</sup> |
| 10    | IN                                                     | 0.05%       | 0.229   | IN   | 0.04%       | 0.129   | IN   | 0.04%       | 0.105   | WL   | 0.04%       | 1.63 10 <sup>-2</sup> | ID   | 0.25%       | 5.31 10 <sup>-3</sup> | WL   | 0.04%       | 2.20 10 <sup>-3</sup> |

# Carbon Footprint of Bitcoin by country

## Result : Example China by Sector

| O. | GWP per transaction per year (kgCO <sub>2</sub> -eqv.) |                               |             |         |      |                               |             |         |      |                               |             |         |      |                               |             |                      |      |                               |             |                      |      |                               |             |                     |
|----|--------------------------------------------------------|-------------------------------|-------------|---------|------|-------------------------------|-------------|---------|------|-------------------------------|-------------|---------|------|-------------------------------|-------------|----------------------|------|-------------------------------|-------------|----------------------|------|-------------------------------|-------------|---------------------|
|    | 2020                                                   |                               |             |         | 2019 |                               |             |         | 2018 |                               |             |         | 2017 |                               |             |                      | 2016 |                               |             |                      | 2015 |                               |             |                     |
|    | C.C.                                                   | Sector                        | P.A.D.* (%) | GWP     | C.C. | Sector                        | P.A.D.* (%) | GWP     | C.C. | Sector                        | P.A.D.* (%) | GWP     | C.C. | Sector                        | P.A.D.* (%) | GWP                  | C.C. | Sector                        | P.A.D.* (%) | GWP                  | C.C. | Sector                        | P.A.D.* (%) | GWP                 |
| 1  | CN                                                     | Elec. Coal                    | 90.19%      | 414.226 | CN   | Elec. Coal                    | 91.10%      | 268.279 | CN   | Elec. Coal                    | 91.34%      | 226.879 | CN   | Elec. Coal                    | 92.13%      | 39.194               | CN   | Elec. Coal                    | 92.18%      | 12.218               | CN   | Elec. Coal                    | 91.68%      | 4.999               |
| 2  | CN                                                     | Elec. Gas                     | 1.73%       | 7.931   | CN   | Elec. Gas                     | 1.75%       | 5.156   | CN   | Elec. Gas                     | 1.76%       | 4.365   | CN   | Elec. Gas                     | 1.78%       | $7.56 \cdot 10^{-1}$ | CN   | Elec. Gas                     | 1.78%       | $2.36 \cdot 10^{-1}$ | CN   | Elec. Gas                     | 1.77%       | $9.6 \cdot 10^{-2}$ |
| 3  | CN                                                     | Iron and Steel                | 1.68%       | 7.712   | CN   | Iron and Steel                | 1.44%       | 4.251   | CN   | Iron and Steel                | 1.39%       | 3.444   | CN   | Iron and Steel                | 1.18%       | $5.04 \cdot 10^{-1}$ | CN   | Iron and Steel                | 1.17%       | $1.55 \cdot 10^{-1}$ | CN   | Iron and Steel                | 1.30%       | $7.1 \cdot 10^{-2}$ |
| 4  | CN                                                     | Bituminous Coal               | 1.07%       | 4.899   | CN   | Bituminous Coal               | 1.06%       | 3.126   | CN   | Bituminous Coal               | 1.06%       | 2.634   | CN   | Bituminous Coal               | 1.06%       | $4.49 \cdot 10^{-1}$ | CN   | Bituminous Coal               | 1.06%       | $1.4 \cdot 10^{-1}$  | CN   | Bituminous Coal               | 1.06%       | $5.8 \cdot 10^{-2}$ |
| 5  | CN                                                     | Steam-Hot W. <del>Solv.</del> | 0.67%       | 3.072   | CN   | Steam-Hot W. <del>Solv.</del> | 0.57%       | 1.674   | CN   | Steam-Hot W. <del>Solv.</del> | 0.54%       | 1.352   | CN   | Steam-Hot W. <del>Solv.</del> | 0.46%       | $1.95 \cdot 10^{-1}$ | CN   | Steam-Hot W. <del>Solv.</del> | 0.45%       | $6 \cdot 10^{-2}$    | CN   | Steam-Hot W. <del>Solv.</del> | 0.51%       | $2.8 \cdot 10^{-2}$ |
| 6  | CN                                                     | Rubber and plastic            | 0.37%       | 1.684   | CN   | Rubber and plastic            | 0.31%       | 0.907   | CN   | Rubber and plastic            | 0.29%       | 0.73    | CN   | Rubber and plastic            | 0.24%       | $1.04 \cdot 10^{-1}$ | CN   | Rubber and plastic            | 0.24%       | $3.2 \cdot 10^{-2}$  | CN   | Rubber and plastic            | 0.27%       | $1.5 \cdot 10^{-2}$ |
| 7  | CN                                                     | O. machinery and computers    | 0.34%       | 1.543   | CN   | O. machinery and computers    | 0.28%       | 0.81    | CN   | O. machinery and computers    | 0.26%       | 0.647   | CN   | O. machinery and computers    | 0.21%       | $8.9 \cdot 10^{-2}$  | CN   | O. machinery and computers    | 0.21%       | $2.7 \cdot 10^{-2}$  | CN   | O. machinery and computers    | 0.24%       | $1.3 \cdot 10^{-2}$ |
| 8  | CN                                                     | Chemicals nec                 | 0.26%       | 1.207   | CN   | Chemicals nec                 | 0.22%       | 0.649   | CN   | Chemicals nec                 | 0.21%       | 0.522   | CN   | Chemicals nec                 | 0.17%       | $7.4 \cdot 10^{-2}$  | CN   | Chemicals nec                 | 0.17%       | $2.3 \cdot 10^{-2}$  | CN   | Chemicals nec                 | 0.20%       | $1.1 \cdot 10^{-2}$ |
| 9  | CN                                                     | Air transport services        | 0.19%       | 0.858   | CN   | Other mineral products        | 0.16%       | 0.478   | CN   | Other mineral products        | 0.16%       | 0.389   | CN   | Other mineral products        | 0.14%       | $5.8 \cdot 10^{-2}$  | CN   | Other mineral products        | 0.14%       | $1.8 \cdot 10^{-2}$  | CN   | Other mineral products        | 0.15%       | $8 \cdot 10^{-3}$   |
| 10 | CN                                                     | Other mineral products        | 0.19%       | 0.851   | CN   | Air transport services        | 0.16%       | 0.471   | CN   | Air transport services        | 0.15%       | 0.381   | CN   | Air transport services        | 0.13%       | $5.5 \cdot 10^{-2}$  | CN   | Air transport services        | 0.13%       | $1.7 \cdot 10^{-2}$  | CN   | Air transport services        | 0.14%       | $8 \cdot 10^{-3}$   |

**THANK YOU**
