# Supplementary material for: Bitcoin and Global Climate Change: Emissions Beyond Borders
Source: Research Square preprint supplement (doi:10.21203/rs.3.rs-564281/v1), 2021-06-22
Supplement: Supplementary file 2 [file b066ec7e3c14f8c5da965458.pdf]

# Bitcoin and Global Climate Change: Emissions beyond borders

## Table of Content

|                                                                                        |    |
|----------------------------------------------------------------------------------------|----|
| Supplementary Methods .....                                                            | 6  |
| 1. Introduction and Background .....                                                   | 6  |
| 2. Methodology.....                                                                    | 8  |
| 3. Estimation of the energy consumption of Bitcoin .....                               | 9  |
| 3.1. Extract Bitcoin Data .....                                                        | 9  |
| 3.2. Energy consumption of Bitcoin .....                                               | 10 |
| 4. Estimation of the Carbon Footprint of Bitcoin .....                                 | 13 |
| 4.1. Carbon Footprint for Electricity Generation by sector .....                       | 13 |
| 4.2. Carbon Footprint for Electricity Generation of the Bitcoin-mining countries ..... | 15 |
| 4.3. Carbon Footprint of Bitcoin Equipment.....                                        | 20 |
| 4.4. Carbon Footprint of Bitcoin energy consumption by country .....                   | 23 |
| 4.5. Carbon Footprint of Bitcoin Mining by country .....                               | 63 |
| References .....                                                                       | 88 |

## Table of Figures

|                                                                                                                                        |    |
|----------------------------------------------------------------------------------------------------------------------------------------|----|
| Figure 1: Methodology to estimate the carbon footprint of Bitcoin .....                                                                | 8  |
| Figure 2: Screenshot of the data extracted from Bitcoin.com.....                                                                       | 10 |
| Figure 3: Screenshot of the source code that energy consumption of Bitcoin.....                                                        | 12 |
| Figure 4: Screenshot of the part generated file that contains greenhouse gas emissions caused by electricity generation in China ..... | 15 |
| Figure 5: GWP of Bitcoin mining energy consumption per transaction by country by year.....                                             | 32 |
| Figure 6: Total annual GWP of Bitcoin mining energy consumption by country by year .....                                               | 33 |
| Figure 7: GWP of Bitcoin Mining per transaction by country by year in kgCO <sub>2</sub> -eqv .....                                     | 64 |
| Figure 8: Total Gas emissions emission by country by year.....                                                                         | 65 |

## Table of Tables

|                                                                                                                                        |    |
|----------------------------------------------------------------------------------------------------------------------------------------|----|
| Table 1. List of Bitcoin processing hardware and their electricity consumption.....                                                    | 10 |
| Table 2. List of companies doing mining Bitcoin .....                                                                                  | 11 |
| Table 3. Energy consumption by country for 2020.....                                                                                   | 12 |
| Table 4. Global annual energy consumption of Bitcoin.....                                                                              | 13 |
| Table 5. Electricity production by source .....                                                                                        | 14 |
| Table 6: Electricity Generation by the energy source in China .....                                                                    | 16 |
| Table 7: Costs of generating electricity by countries in Euro .....                                                                    | 16 |
| Table 8: Global Warming Potentials (IPCC Second Assessment Report).....                                                                | 17 |
| Table 9: Electricity Generation by the energy source in USA .....                                                                      | 17 |
| Table 10: Electricity Generation by the energy source in India.....                                                                    | 18 |
| Table 11: Electricity Generation by the energy source in Georgia .....                                                                 | 18 |
| Table 12: Electricity Generation by the energy source in Iceland .....                                                                 | 19 |
| Table 13: Electricity Generation by the energy source in Sweden .....                                                                  | 19 |
| Table 14: Electricity Generation by the energy source in Finland.....                                                                  | 19 |
| Table 15: GWP kWh of Electricity generation sector for Bitcoin-mining countries.....                                                   | 20 |
| Table 16: Distribution of other mining equipment in this study .....                                                                   | 21 |
| Table 17: Average hash rate in the Bitcoin platform per year .....                                                                     | 21 |
| Table 18: Carbon Footprint of Mining Equipment .....                                                                                   | 23 |
| Table 19: The number of transactions mined per year .....                                                                              | 23 |
| Table 20: List of countries by electricity production .....                                                                            | 25 |
| Table 21: GWP of Bitcoin mining energy consumption per transaction by country by year .....                                            | 31 |
| Table 22: Total annual GWP of Bitcoin mining energy consumption by country by year.....                                                | 32 |
| Table 23: Carbon Footprint Distribution of Bitcoin mining energy consumption in China per transaction by country .....                 | 34 |
| Table 24: Carbon Footprint Distribution of Bitcoin mining energy consumption in China per transaction by sector in Supply Chain.....   | 34 |
| Table 25: Total Annual Carbon Footprint Distribution of Bitcoin mining energy consumption in China by country .....                    | 35 |
| Table 26: Total Annual Carbon Footprint Distribution of Bitcoin mining energy consumption in China by sector.....                      | 36 |
| Table 27: Carbon Footprint Distribution of Bitcoin mining energy consumption in Finland per transaction by country .....               | 38 |
| Table 28: Carbon Footprint Distribution of Bitcoin mining energy consumption in Finland per transaction by sector in Supply Chain..... | 38 |

|                                                                                                                                        |    |
|----------------------------------------------------------------------------------------------------------------------------------------|----|
| Table 29: Total Annual Carbon Footprint Distribution of Bitcoin mining energy consumption in Finland by country .....                  | 40 |
| Table 30: Total Annual Carbon Footprint Distribution of Bitcoin mining energy consumption in Finland by sector .....                   | 40 |
| Table 31: Carbon Footprint Distribution of Bitcoin mining energy consumption in Georgia per transaction by sector in Supply Chain..... | 43 |
| Table 32: Total Annual Carbon Footprint Distribution of Bitcoin mining energy consumption in Georgia by country .....                  | 44 |
| Table 33: Total Annual Carbon Footprint Distribution of Bitcoin mining energy consumption in Georgia by sector .....                   | 45 |
| Table 34: Carbon Footprint Distribution of Bitcoin mining energy consumption in Iceland per transaction by country .....               | 46 |
| Table 35: Carbon Footprint Distribution of Bitcoin mining energy consumption in Iceland per transaction by sector in Supply Chain..... | 47 |
| Table 36: Total Annual Carbon Footprint Distribution of Bitcoin mining energy consumption in Iceland by country.....                   | 48 |
| Table 37: Total Annual Carbon Footprint Distribution of Bitcoin mining energy consumption in Iceland by sector.....                    | 49 |
| Table 38: Carbon Footprint Distribution of Bitcoin mining energy consumption in USA per transaction by country .....                   | 51 |
| Table 39: Carbon Footprint Distribution of Bitcoin mining energy consumption in USA per transaction by sector in Supply Chain.....     | 52 |
| Table 40: Total Annual Carbon Footprint Distribution of Bitcoin mining energy consumption in USA by country.....                       | 53 |
| Table 41: Total Annual Carbon Footprint Distribution of Bitcoin mining energy consumption in USA by sector .....                       | 54 |
| Table 42: Carbon Footprint Distribution of Bitcoin mining energy consumption in India per transaction by country .....                 | 55 |
| Table 43: Carbon Footprint Distribution of Bitcoin mining energy consumption in India per transaction by sector in Supply Chain.....   | 56 |
| Table 44: Total Annual Carbon Footprint Distribution of Bitcoin mining energy consumption in India by country.....                     | 57 |
| Table 45: Total Annual Carbon Footprint Distribution of Bitcoin mining energy consumption in India by sector .....                     | 58 |
| Table 46: Carbon Footprint Distribution of Bitcoin mining energy consumption in Sweden per transaction by country .....                | 59 |
| Table 47: Carbon Footprint Distribution of Bitcoin mining energy consumption in Sweden per transaction by sector in Supply Chain.....  | 60 |
| Table 48: Total Annual Carbon Footprint Distribution of Bitcoin mining energy consumption in Sweden by country .....                   | 61 |
| Table 49: Total Annual Carbon Footprint Distribution of Bitcoin mining energy consumption in Sweden by sector.....                     | 61 |
| Table 50: GWP of Bitcoin Mining per transaction by country by year in kgCO <sub>2</sub> -eqv. ....                                     | 63 |
| Table 51: Total Annual GHG emission of Bitcoin mining per by country by country by year.....                                           | 64 |
| Table 52: Abbreviation of sectors .....                                                                                                | 66 |
| Table 53: Carbon Footprint Distribution of Bitcoin mining in China per transaction by country.....                                     | 67 |
| Table 54: Carbon Footprint Distribution of Bitcoin mining in China per transaction by sector in Supply Chain.....                      | 67 |
| Table 55: Total Annual Carbon Footprint Distribution of Bitcoin mining in China by country.....                                        | 68 |

|                                                                                                                      |    |
|----------------------------------------------------------------------------------------------------------------------|----|
| Table 56: Total Annual Carbon Footprint Distribution of Bitcoin mining in China by sector.....                       | 68 |
| Table 57: Carbon Footprint Distribution of Bitcoin mining in Finland per transaction by country ....                 | 69 |
| Table 58: Carbon Footprint Distribution of Bitcoin mining in Finland per transaction by sector in Supply Chain ..... | 70 |
| Table 59: Total Annual Carbon Footprint Distribution of Bitcoin mining in Finland by country .....                   | 71 |
| Table 60: Total Annual Carbon Footprint Distribution of Bitcoin mining in Finland by sector .....                    | 71 |
| Table 61: Carbon Footprint Distribution of Bitcoin mining in Georgia per transaction by country ...                  | 72 |
| Table 62: Carbon Footprint Distribution of Bitcoin mining in Georgia per transaction by sector in Supply Chain ..... | 73 |
| Table 63: Total Annual Carbon Footprint Distribution of Bitcoin mining in Georgia by country .....                   | 73 |
| Table 64: Total Annual Carbon Footprint Distribution of Bitcoin mining in Georgia by sector .....                    | 74 |
| Table 65: Carbon Footprint Distribution of Bitcoin mining in Iceland per transaction by country ....                 | 75 |
| Table 66: Carbon Footprint Distribution of Bitcoin mining in Iceland per transaction by sector in Supply Chain ..... | 75 |
| Table 67: Total Annual Carbon Footprint Distribution of Bitcoin mining in Iceland by country.....                    | 76 |
| Table 68: Total Annual Carbon Footprint Distribution of Bitcoin mining in Iceland by sector.....                     | 77 |
| Table 69: Carbon Footprint Distribution of Bitcoin mining in USA per transaction by country .....                    | 78 |
| Table 70: Carbon Footprint Distribution of Bitcoin mining in USA per transaction by sector in Supply Chain .....     | 78 |
| Table 71: Total Annual Carbon Footprint Distribution of Bitcoin mining in USA by country.....                        | 79 |
| Table 72: Total Annual Carbon Footprint Distribution of Bitcoin mining in USA by sector .....                        | 80 |
| Table 73: Carbon Footprint Distribution of Bitcoin mining in India per transaction by country .....                  | 81 |
| Table 74: Carbon Footprint Distribution of Bitcoin mining in India per transaction by sector in Supply Chain .....   | 81 |
| Table 75: Total Annual Carbon Footprint Distribution of Bitcoin mining in India by country .....                     | 82 |
| Table 76: Total Annual Carbon Footprint Distribution of Bitcoin mining in India by sector .....                      | 82 |
| Table 77: Carbon Footprint Distribution of Bitcoin mining in Sweden per transaction by country....                   | 83 |
| Table 78: Carbon Footprint Distribution of Bitcoin mining in Sweden per transaction by sector in Supply Chain .....  | 83 |
| Table 79: Total Annual Carbon Footprint Distribution of Bitcoin mining in Sweden by country .....                    | 84 |
| Table 80: Total Annual Carbon Footprint Distribution of Bitcoin mining in Sweden by sector.....                      | 85 |

## Table of Equations

|                                                                                                                |    |
|----------------------------------------------------------------------------------------------------------------|----|
| Equation 1: Leontief's inverse formula.....                                                                    | 13 |
| Equation 2: Environmental, economic and social impacts per industry per economic output unit ....              | 14 |
| Equation 3: Quantification of the direct and indirect social, economic and environmental impacts sectors ..... | 14 |
| Equation 4: Impact of electricity generation in country I per M. Euro .....                                    | 15 |
| Equation 5: Impact of electricity generation in China per M. Euro .....                                        | 16 |
| Equation 6: Footprint of electricity generation in Country I per Kg/ kWh.....                                  | 16 |
| Equation 7: Global Warming Potentials of electricity generation in country I per.....                          | 17 |
| Equation 8: Number of mining machine used per year.....                                                        | 22 |
| Equation 9: Cost of machine used for Bitcoin mining per year. ....                                             | 22 |
| Equation 10: Carbon Footprint of Mining Equipment per Year .....                                               | 22 |
| Equation 11: Average energy consumption per transaction.....                                                   | 23 |
| Equation 12: Average number of transactions mined per country .....                                            | 24 |
| Equation 13: Annual carbon footprint of Bitcoin electricity consumption per country per tr. ....               | 24 |
| Equation 14: Annual footprint of energy electricity needed for mining Bitcoin per country .....                | 25 |

## Glossary

|                  |                                                                                                                                        |
|------------------|----------------------------------------------------------------------------------------------------------------------------------------|
| PoW              | Proof of work                                                                                                                          |
| SDG              | Sustainable Development Goals                                                                                                          |
| MRIO             | Multi-Regional Input-Output modeling                                                                                                   |
| GWP              | Global Warming Potential                                                                                                               |
| GHG              | Greenhouse gas                                                                                                                         |
| $I_{i,me}$       | Impact of electricity generation in country i per M. Euro                                                                              |
| $PIS_{k,i}$      | Percentage of impact of energy source k in electricity generation in country i                                                         |
| $IS_{k,i}$       | Impact of energy source k in electricity generation in country i                                                                       |
| $FEG_i$          | Footprint of electricity generation in country i per Kg/ kWh                                                                           |
| $CEG_i$          | Cost generation of 1 kWh in country i in Euro .                                                                                        |
| $GWP100_{e,i}$   | GWP100 of electricity generation e in country i en Kg CO <sub>2</sub> -eqv per kWh                                                     |
| $ID_{i,k}$       | Industrial designation or common name of Species k in country i                                                                        |
| $GWP100_{i,k}$   | Global warming potentials species k in country i                                                                                       |
| $NMM_t$          | Average number of mining machine used per year t                                                                                       |
| $NMM_{t,k}$      | Average number of mining machine used per machine type k per year t.                                                                   |
| $AH_t$           | Average of hashrate per year t.                                                                                                        |
| $MPr_k$          | Percentage of using machine type k                                                                                                     |
| $MSl_k$          | The service life of a machine k                                                                                                        |
| $H_k$            | Hashrate per machine type k                                                                                                            |
| $CMM_t$          | Cost of mining machines per year                                                                                                       |
| $MPri_k$         | Prices of mining machine type k                                                                                                        |
| $CFME_t$         | Carbon footprint of mining equipment per year t.                                                                                       |
| $CFME$           | Footprint of mining equipment per million euro                                                                                         |
| $AECTr_{i,t}$    | Annual electricity consumption per transaction in country i in year t.                                                                 |
| $EC_{i,t}$       | Annual electricity consumption for Bitcoin mining country i in year t                                                                  |
| $Tr_{i,t}$       | Total annual number transaction in country i in year t.                                                                                |
| $ANTr_{i,t}$     | Average number of transactions mined in country i in year t                                                                            |
| $MPr_{i,t}$      | Mining percentage in country i in year t                                                                                               |
| $AFECBMTr_{i,t}$ | Annual carbon footprint from electricity gene consumption ration of the Bitcoin-mining in country i in year t per transaction per kWh. |
| $AFECBM_{i,t}$   | Annual carbon footprint from electricity consumption of the Bitcoin-mining in country i in year t per kWh                              |

# Supplementary Methods

## 1. Introduction and Background

All 193 member states of the United Nations (UN) have adopted the Sustainable Development Goals<sup>1</sup> in 2015 as the organizing framework for global cooperation development from 2015 to 2030. The goals were defined considering unsatisfactory world economy and considerable progress in know-how and modern technologies. Furthermore, the world is currently experiencing environmental threats such as loss of biodiversity and global warming and increasing social and economic inequalities. Thus, the member states of the UN adopted the Sustainable Development Goals to fight the global challenges that the world is facing, such as environmental threats and increasing inequalities and social exclusion<sup>1</sup>. To do so, six significant transformations are needed to change the way industries and technologies are used namely (1) education, gender and inequality; (2) health, well-being and demography; (3) energy decarbonization and sustainable industry; (4) sustainable food, land, water and oceans; (5) sustainable cities and communities; and (6) digital revolution for sustainable development.

One fundamental transformation should be achieved is to harness in a positive way the digital revolution. Our lives are being transformed by using emerging technologies such as internet, social media, artificial intelligence, robotics, cryptocurrencies, virtual reality, augmented reality and cloud computing.

However, these new technologies really challenge us and the idea of a transformation to a digital world that is a productive, secure, sustainable and protects our human rights does not defeat them through surveillance and loss of property, is the sixth of these great transformations. In addition, this transformation must be in line with the United Nations Sustainable Development Goals, especially goal 13 on climate action since the planet is undergoing three mega environmental crises at the moment: human-induced climate change, the massive destruction of biological diversity and the weakening of the functioning of the ecosystems, and mega-pollution in forms of air and water pollution.

Furthermore, the digital revolution includes cryptocurrencies, as one of the most promising emerging technologies. Comparable to national currencies such as the US dollar, a cryptocurrency represents a medium of exchange. However, it is digital and employs encryption techniques to control the creation of monetary units and verification of fund transfers. Cryptocurrencies have gained the attention of financial, banking, and governmental institutions. To illustrate, Mark Carney, the Bank of England Governor, said in a speech to the Inaugural Scottish Economics Conference on the future of money in March 2018<sup>2</sup> “bringing crypto-assets onto a level regulatory playing field could also catalyze private innovation to create a more resilient, effective payments system.” Therefore, politicians and financial experts have recognized the importance and advantages of cryptocurrencies like Bitcoin the best-known cryptocurrency and the one for which Blockchain technology was invented. Owing to the growing interest, the price of Bitcoin has reached 60,000 USD<sup>3</sup>. According to JPMorgan<sup>4</sup>, it is estimated that a value of 1 Bitcoin will reach 146,000 USD. In conclusion, cryptocurrencies and

Blockchain are very likely to transform the financial world fundamentally. Cryptocurrency and Blockchain applications in this ecosystem are ever-evolving technologies aiming to meet users' needs.

Bitcoin is an electronic, virtual, decentralized currency based on Blockchain technology which was established in 2009 and was created by Satoshi Nakamoto<sup>5</sup> (pseudonym). The Bitcoin ecosystem consists of users that establish communication online through the Bitcoin protocol, which is an open-source software application. Users employ this protocol for storing and purchasing Bitcoins. Furthermore, Bitcoins can be exchanged for other currencies and used to buy and sell goods. Bitcoins are issued on the network and the transactions occur via Bitcoin mining. Its exchange rate is characterized by high fluctuations. In January 2021, there were 18.3 million Bitcoins in circulation with a total value of roughly 730 billion US dollars<sup>6</sup>, although the exchange rate of Bitcoins has shown very large fluctuations.

The purpose of using Blockchain in the Bitcoin platform was to bypass a central authority and instead use a trusted peer-to-peer network pseudo-anonymously to ensure the use of digital money to purchase services and goods in a secure way. Blockchain is a public ledger that involves a record of publicly announced transactions. Most importantly, all involved participants can access those transactions, which implies that the identical Blockchain copy is accessible by all of them. Blockchain functions by dividing individual transactions into published and time-stamped blocks, which cannot be reversed or modified. Any potential modification is prevented because the hash of the previous blocks is included in all upcoming blocks.

It is critical to highlight that Bitcoin and Blockchain are not supervised or controlled by any particular body, such as a governing body, centralized body, or bank. Bitcoin transactions are conducted by the mining community, which comprises individual users with mining hardware and computing power. The miners are necessary to validate, verify, and record transactions in the public Blockchain. The mining operation focuses on solving complex mathematical puzzles respecting the proof of work process. The proof of work (PoW) has a double function. First, It serves for validating a transaction. Second, miners need proof of work for earning a reward. Accordingly, there is a competition among the miners for mining a specific transaction, considering the reward is given to the user who is the first to resolve the puzzle. The number of computer calculations required for recording and verifying transactions is enormous. Moreover, the puzzles are exceptionally complex, and their complexity is gradually increasing owing to the increasing value and popularity of Bitcoins. Consequently, the demand for high-powered computer processing and electricity is also on the rise.

## 2. Methodology

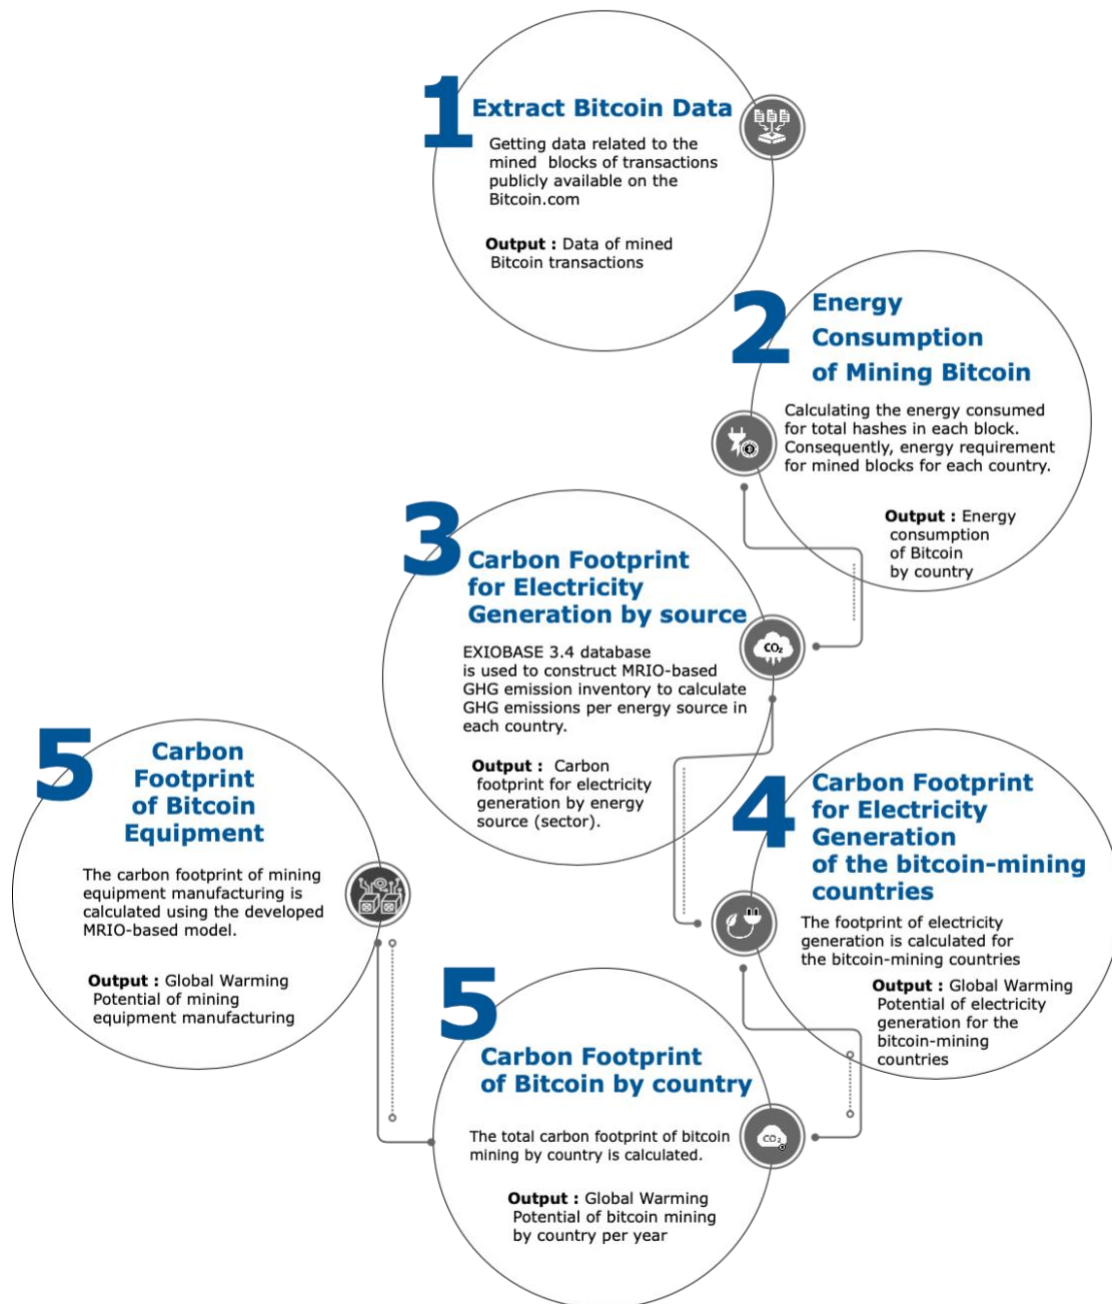

Figure 1: Methodology to estimate the carbon footprint of Bitcoin



To estimate the carbon footprint of Bitcoin, there are six main strategic steps to be followed as shown in Figure 1. The first step is to extract all the data related to the mined Bitcoin transaction publicly available on the Bitcoin website. Next, the energy consumed per total hashes in each transaction is calculated. As a result, the output of the second step is the energy consumption of Bitcoin per country per year. In the third step, the global EXIOBASE 3.4 database is used to develop a MRIO-based carbon footprint analysis and to calculate the carbon footprint of electricity generation. In the fourth step, the footprint of carbon dioxide equivalent to electricity generation calculated in the previous step is used to calculate the footprint of electricity generation by country. Next, carbon footprint of mining equipment manufacturing is calculated using the developed MRIO-based model. Finally, the two main source of carbon emissions are merged and analyzed per country, per transaction for the last 6 years. The function unit of the analysis is per transaction as, arguably, the service provided by the Bitcoin use case. While the utility of Bitcoin can also be considered as “an asset which holds value (such as gold)”, the functional unit, in such case, would be significantly fluctuating (e.g. per \$ value holding or per gram gold equivalent). Hence, per transaction would provide more a meaningful analysis from carbon footprint estimation perspective. However, we also provide estimations on annual basis per country, per transaction, and per country.

### **3. Estimation of the energy consumption of Bitcoin**

The first step is to extract Bitcoin transaction data from “Bitcoin.com” (please see 3.1. to access the data). Next, we estimated the energy consumption stemming from Bitcoin mining, which is explained in detail in Section 3.2.

#### **3.1. Extract Bitcoin Data**

To access the energy consumption data by country please see the related Folder: Document\Chaptre-1\N1-Extract-Data

##### **3.1.1. Method**

The "proof-of-work" (PoW) process is used for mining Bitcoins and verifying related transactions on the network. PoW implies that through solving hard math problems, computing power has been used to mine Bitcoin in each block. The computing power requires energy consumption. Thus, for calculating this consumption, it is necessary to access data about the blocks publicly available on the Bitcoin website<sup>7</sup>. To perform the calculation, we proposed a script aimed at downloading all the blocks mined in a given year.

##### **3.1.2. Results**

Figure 2 shows the downloaded data of all blocks mined in a given year. The purpose of extracting data is to obtain information regarding the degree of difficulty of mining a Bitcoin block. In terms of the technical aspect, it refers to detecting a hash below a particular target. The degree of difficulty refers to the computing power need to mine the same number of blocks. The more difficult the problem, the more computing power is needed; however, the difficulty increases the security of the network against attacks. In addition, the data regarding the mining pool shows the country in which the mining process takes part.

| height | version | mrlk_root | timestamp | bits  | nonce | hash     | prev_blo | next_blo | size   | pool_diff | difficulty | tx_count | reward_b | reward_f | created | confirm | is_orpha | curr_max | is_sw_bk | stripped | weight | Mining_p  |
|--------|---------|-----------|-----------|-------|-------|----------|----------|----------|--------|-----------|------------|----------|----------|----------|---------|---------|----------|----------|----------|----------|--------|-----------|
| 556459 | 5E+08   | 3351928:  | 2E+09     | 4E+08 | 2E+09 | 00000000 | 00000000 | 00000000 | 728024 | 8E+12     | 6E+12      | 946      | 1E+09    | 5E+06    | 2E+09   | 64753   | FALSE    | 2E+09    | TRUE     | 629612   | 3E+06  | BitFury   |
| 556460 | 5E+08   | 6642612:  | 2E+09     | 4E+08 | 4E+09 | 00000000 | 00000000 | 00000000 | 1E+06  | 2E+13     | 6E+12      | 3492     | 1E+09    | 2E+07    | 2E+09   | 64752   | FALSE    | 2E+09    | TRUE     | 923263   | 4E+06  | AntPool   |
| 556461 | 5E+08   | dc702d1:  | 2E+09     | 4E+08 | 2E+09 | 00000000 | 00000000 | 00000000 | 991069 | 3E+13     | 6E+12      | 1608     | 1E+09    | 2E+06    | 2E+09   | 64751   | FALSE    | 2E+09    | TRUE     | 882179   | 4E+06  | SlushPox  |
| 556462 | 5E+08   | 794f4ed:  | 2E+09     | 4E+08 | 3E+09 | 00000000 | 00000000 | 00000000 | 1E+06  | 1E+13     | 6E+12      | 1883     | 1E+09    | 2E+07    | 2E+09   | 64750   | FALSE    | 2E+09    | TRUE     | 966697   | 4E+06  | BTC.com   |
| 556463 | 5E+08   | f761e7b:  | 2E+09     | 4E+08 | 7E+07 | 00000000 | 00000000 | 00000000 | 740677 | 2E+14     | 6E+12      | 1560     | 1E+09    | 4E+06    | 2E+09   | 64749   | FALSE    | 2E+09    | TRUE     | 634798   | 3E+06  | WAV1CN    |
| 556464 | 5E+08   | 35e31e3:  | 2E+09     | 4E+08 | 4E+09 | 00000000 | 00000000 | 00000000 | 688149 | 8E+13     | 6E+12      | 1573     | 1E+09    | 5E+06    | 2E+09   | 64748   | FALSE    | 2E+09    | TRUE     | 579571   | 2E+06  | AntPool   |
| 556465 | 1E+09   | 00955d3:  | 2E+09     | 4E+08 | 5E+08 | 00000000 | 00000000 | 00000000 | 358678 | 7E+12     | 6E+12      | 676      | 1E+09    | 3E+06    | 2E+09   | 64747   | FALSE    | 2E+09    | TRUE     | 303493   | 1E+06  | HuobiPool |
| 556466 | 5E+08   | c068a78:  | 2E+09     | 4E+08 | 1E+09 | 00000000 | 00000000 | 00000000 | 536247 | 3E+13     | 6E+12      | 1084     | 1E+09    | 1E+07    | 2E+09   | 64746   | FALSE    | 2E+09    | TRUE     | 453115   | 2E+06  | AntPool   |
| 556467 | 5E+08   | 8128ef7e: | 2E+09     | 4E+08 | 2E+09 | 00000000 | 00000000 | 00000000 | 202433 | 6E+12     | 6E+12      | 379      | 1E+09    | 4E+06    | 2E+09   | 64745   | FALSE    | 2E+09    | TRUE     | 181386   | 746531 | SlushPox  |
| 556468 | 5E+08   | 0ee1277f: | 2E+09     | 4E+08 | 3E+09 | 00000000 | 00000000 | 00000000 | 1E+06  | 7E+12     | 6E+12      | 2547     | 1E+09    | 8E+06    | 2E+09   | 64744   | FALSE    | 2E+09    | TRUE     | 960067   | 4E+06  | ViaBTC    |
| 556469 | 5E+08   | 93421b1e: | 2E+09     | 4E+08 | 2E+08 | 00000000 | 00000000 | 00000000 | 690467 | 1E+13     | 6E+12      | 1384     | 1E+09    | 5E+06    | 2E+09   | 64743   | FALSE    | 2E+09    | TRUE     | 600388   | 2E+06  | BitFury   |
| 556470 | 5E+08   | fe557c7:  | 2E+09     | 4E+08 | 4E+08 | 00000000 | 00000000 | 00000000 | 848405 | 3E+13     | 6E+12      | 1527     | 1E+09    | 2E+07    | 2E+09   | 64742   | FALSE    | 2E+09    | TRUE     | 717917   | 3E+06  | F2Pool    |
| 556471 | 5E+08   | e33205d:  | 2E+09     | 4E+08 | 2E+09 | 00000000 | 00000000 | 00000000 | 1E+06  | 2E+13     | 6E+12      | 3040     | 1E+09    | 2E+07    | 2E+09   | 64741   | FALSE    | 2E+09    | TRUE     | 928370   | 4E+06  | Poolin    |
| 556472 | 5E+08   | c8742be:  | 2E+09     | 4E+08 | 2E+09 | 00000000 | 00000000 | 00000000 | 1E+06  | 6E+12     | 6E+12      | 3005     | 1E+09    | 7E+06    | 2E+09   | 64740   | FALSE    | 2E+09    | TRUE     | 959428   | 4E+06  | AntPool   |
| 556473 | 5E+08   | 8197d4d:  | 2E+09     | 4E+08 | 1E+09 | 00000000 | 00000000 | 00000000 | 1E+06  | 6E+12     | 6E+12      | 3321     | 1E+09    | 2E+07    | 2E+09   | 64739   | FALSE    | 2E+09    | TRUE     | 920464   | 4E+06  | HuobiPool |
| 556474 | 5E+08   | 53a0d4e:  | 2E+09     | 4E+08 | 2E+09 | 00000000 | 00000000 | 00000000 | 1E+06  | 2E+14     | 6E+12      | 1762     | 1E+09    | 3E+06    | 2E+09   | 64738   | FALSE    | 2E+09    | TRUE     | 979140   | 4E+06  | SlushPox  |
| 556475 | 5E+08   | f97787c:  | 2E+09     | 4E+08 | 3E+07 | 00000000 | 00000000 | 00000000 | 611994 | 4E+13     | 6E+12      | 1212     | 1E+09    | 5E+06    | 2E+09   | 64737   | FALSE    | 2E+09    | TRUE     | 480726   | 2E+06  | F2Pool    |
| 556476 | 5E+08   | 7b09233:  | 2E+09     | 4E+08 | 2E+09 | 00000000 | 00000000 | 00000000 | 877186 | 6E+12     | 6E+12      | 1843     | 1E+09    | 8E+06    | 2E+09   | 64736   | FALSE    | 2E+09    | TRUE     | 758626   | 3E+06  | BTC.com   |
| 556477 | 5E+08   | 9e52e8f:  | 2E+09     | 4E+08 | 3E+09 | 00000000 | 00000000 | 00000000 | 294313 | 2E+14     | 6E+12      | 630      | 1E+09    | 2E+06    | 2E+09   | 64735   | FALSE    | 2E+09    | TRUE     | 248827   | 1E+06  | ViaBTC    |
| 556478 | 5E+08   | 9e67d58:  | 2E+09     | 4E+08 | 4E+09 | 00000000 | 00000000 | 00000000 | 1E+06  | 2E+13     | 6E+12      | 2186     | 1E+09    | 7E+06    | 2E+09   | 64734   | FALSE    | 2E+09    | TRUE     | 921130   | 4E+06  | BTC.com   |
| 556479 | 5E+08   | 8f8a499f: | 2E+09     | 4E+08 | 3E+08 | 00000000 | 00000000 | 00000000 | 1E+06  | 8E+12     | 6E+12      | 2094     | 1E+09    | 9E+06    | 2E+09   | 64733   | FALSE    | 2E+09    | TRUE     | 923719   | 4E+06  | HuobiPool |
| 556480 | 5E+08   | 9c68820a: | 2E+09     | 4E+08 | 2E+09 | 00000000 | 00000000 | 00000000 | 141952 | 1E+14     | 6E+12      | 317      | 1E+09    | 845556   | 2E+09   | 64732   | FALSE    | 2E+09    | TRUE     | 115443   | 488281 | Poolin    |
| 556481 | 5E+08   | f3525205: | 2E+09     | 4E+08 | 4E+09 | 00000000 | 00000000 | 00000000 | 642204 | 1E+14     | 6E+12      | 1301     | 1E+09    | 4E+06    | 2E+09   | 64731   | FALSE    | 2E+09    | TRUE     | 542324   | 2E+06  | Poolin    |
| 556482 | 5E+08   | 22fe4d0f: | 2E+09     | 4E+08 | 2E+07 | 00000000 | 00000000 | 00000000 | 1E+06  | 1E+13     | 6E+12      | 2725     | 1E+09    | 1E+07    | 2E+09   | 64730   | FALSE    | 2E+09    | TRUE     | 949810   | 4E+06  | BTC.com   |
| 556483 | 5E+08   | 11c01c3f: | 2E+09     | 4E+08 | 9E+08 | 00000000 | 00000000 | 00000000 | 911937 | 7E+12     | 6E+12      | 1287     | 1E+09    | 6E+06    | 2E+09   | 64729   | FALSE    | 2E+09    | TRUE     | 789661   | 3E+06  | F2Pool    |
| 556484 | 5E+08   | 947489e:  | 2E+09     | 4E+08 | 3E+09 | 00000000 | 00000000 | 00000000 | 894476 | 2E+13     | 6E+12      | 1952     | 1E+09    | 1E+07    | 2E+09   | 64728   | FALSE    | 2E+09    | TRUE     | 751724   | 3E+06  | DPOOL     |
| 556485 | 5E+08   | e58eeb11: | 2E+09     | 4E+08 | 4E+09 | 00000000 | 00000000 | 00000000 | 361987 | 4E+13     | 6E+12      | 862      | 1E+09    | 3E+06    | 2E+09   | 64727   | FALSE    | 2E+09    | TRUE     | 312041   | 1E+06  | ViaBTC    |
| 556486 | 5E+08   | ab32c83:  | 2E+09     | 4E+08 | 4E+09 | 00000000 | 00000000 | 00000000 | 1E+06  | 3E+13     | 6E+12      | 2800     | 1E+09    | 2E+07    | 2E+09   | 64726   | FALSE    | 2E+09    | TRUE     | 196609   | 4E+06  | BTC.TOF   |
| 556487 | 5E+08   | 758309f:  | 2E+09     | 4E+08 | 2E+09 | 00000000 | 00000000 | 00000000 | 1E+06  | 2E+13     | 6E+12      | 2125     | 1E+09    | 4E+06    | 2E+09   | 64725   | FALSE    | 2E+09    | TRUE     | 970223   | 4E+06  | Poolin    |
| 556488 | 5E+08   | 62f2a50f: | 2E+09     | 4E+08 | 2E+09 | 00000000 | 00000000 | 00000000 | 402337 | 8E+12     | 6E+12      | 653      | 1E+09    | 2E+06    | 2E+09   | 64724   | FALSE    | 2E+09    | TRUE     | 330503   | 1E+06  | ViaBTC    |
| 556489 | 5E+08   | b5d338b:  | 2E+09     | 4E+08 | 7E+08 | 00000000 | 00000000 | 00000000 | 907584 | 6E+12     | 6E+12      | 1670     | 1E+09    | 7E+06    | 2E+09   | 64723   | FALSE    | 2E+09    | TRUE     | 765479   | 3E+06  | DPOOL     |
| 556490 | 5E+08   | 720e56a:  | 2E+09     | 4E+08 | 4E+08 | 00000000 | 00000000 | 00000000 | 763862 | 4E+13     | 6E+12      | 1723     | 1E+09    | 6E+06    | 2E+09   | 64722   | FALSE    | 2E+09    | TRUE     | 645507   | 3E+06  | unknown   |
| 556491 | 5E+08   | 24088f4:  | 2E+09     | 4E+08 | 2E+09 | 00000000 | 00000000 | 00000000 | 366121 | 2E+13     | 6E+12      | 748      | 1E+09    | 2E+06    | 2E+09   | 64721   | FALSE    | 2E+09    | TRUE     | 291021   | 1E+06  | HuobiPool |
| 556492 | 5E+08   | 5fd9d99f: | 2E+09     | 4E+08 | 2E+09 | 00000000 | 00000000 | 00000000 | 1E+06  | 3E+15     | 6E+12      | 2330     | 1E+09    | 1E+07    | 2E+09   | 64720   | FALSE    | 2E+09    | TRUE     | 952794   | 4E+06  | Poolin    |

Figure 2: Screenshot of the data extracted from Bitcoin.com

### 3.2. Energy consumption of Bitcoin

To access the energy consumption data by country please see the related Folder: Document\Chaptre-1\N2-EnergyConsumptionOfCountries

#### 3.2.1. Method

This section shows the steps required for estimating the energy consumption needed to mine Bitcoin.

##### Step 1: Load Data:

To perform analysis, three sources of data were used.

- Source One: We used the following load databases that include all blocks per year. Those data were used to conduct calculations shown previously.
- Source Two: We followed Bendiksen et al.<sup>8,9</sup> to adopt the equipment types used in the analysis, as those authors noted that approximately 80% of miners used Antminer S9 for modeling, followed by 7.6% and 6.7% of miners who used Avalon 841 and Ebang E 10, respectively. The remaining 5.8% used other machines for modeling. Those three types of mining hardware are shown in Table 1 along with the metrics required for calculating the energy consumption.

Table 1. List of Bitcoin processing hardware and their electricity consumption

| Mining Hardware    | Hash Rate (Ghash/s) | Consumption (GWh) | Energy Efficiency (Mhash/J) | References  |
|--------------------|---------------------|-------------------|-----------------------------|-------------|
| <b>AntMiner S9</b> | 14,000              | 1.38E-06          | 10.448                      | 10          |
| <b>Avalon821</b>   | 11,000              | 1.2E-06           | 9.167                       | 10 , 11, 12 |
| <b>Ebit E10</b>    | 18,000              | 1.62E-06          | 11.111                      | 10 , 11, 12 |

Table 1 shows the hash rate (Ghash/s), Consumption, (GWh), Energy Efficiency (Mhash/J), and references for AntMiner S9, Avalon 821, and Ebit E10. It can be seen that the lowest hash rate is for Avalon 821 (11 000 Ghash/s) and the highest rate for Ebit E10 (18 000 Ghash/s).

- *Source Three:* we use the list of companies doing mining and the CO<sub>2</sub> emissions of electricity generation in their claimed countries proposed by Mora et al<sup>10</sup>. Table 2 shows the list of companies engaged in mining Bitcoin and claiming blocks, the place where they are located, and the amount of CO<sub>2</sub>e emitted in those places. It can be seen that the majority of the companies are located either in China or in the US, depending on their server location. However, a significant number of companies also operate globally. This Table shows the values of CO<sub>2</sub> emissions of electricity generation in the countries where mining takes place, although it does not show where the actual Bitcoin computing occurs.

*Table 2. List of companies doing mining Bitcoin*

| Mining pool                | Known Server Location     | CO <sub>2</sub> -eqv. /GWh(Tons) | Carbon/GWh(Tons) | Mining pool website                                                     |
|----------------------------|---------------------------|----------------------------------|------------------|-------------------------------------------------------------------------|
| <b>1Hash</b>               | China                     | 661.73                           | 180.4554         | <a href="http://www.1hash.com/">http://www.1hash.com/</a>               |
| <b>AntPool</b>             | China                     | 661.73                           | 180.4554         | <a href="https://antpool.com">https://antpool.com</a>                   |
| <b>BATPOOL</b>             | China                     | 661.73                           | 180.4554         | <a href="https://www.batpool.com/">https://www.batpool.com/</a>         |
| <b>BCMonster</b>           | U.S., China               | 580.04                           | 158.1783         | <a href="http://www.bcmonster.com/">http://www.bcmonster.com/</a>       |
| <b>BitClub Network</b>     | U.S.                      | 498.34                           | 135.8986         | <a href="https://bitclubnetwork.com">https://bitclubnetwork.com</a>     |
| <b>Bitcoin.com</b>         | Global                    | 573.86                           | 156.493          | <a href="https://pool.Bitcoin.com">https://pool.Bitcoin.com</a>         |
| <b>Bitfury</b>             | Georgia, Finland, Iceland | 132.6                            | 36.16035         | <a href="http://www.bitfury.org/">http://www.bitfury.org/</a>           |
| <b>BitMinter</b>           | U.S., E.U.                | 414.46                           | 113.0243         | <a href="https://bitminter.com">https://bitminter.com</a>               |
| <b>BTC.com</b>             | China                     | 661.73                           | 180.4554         | <a href="https://pool.btc.com">https://pool.btc.com</a>                 |
| <b>BTC.TOP</b>             | China                     | 661.73                           | 180.4554         | <a href="http://btc.top/">http://btc.top/</a>                           |
| <b>BTCC</b>                | China                     | 661.73                           | 180.4554         | <a href="https://pool.btcc.com/">https://pool.btcc.com/</a>             |
| <b>BW Pool</b>             | China                     | 661.73                           | 180.4554         | <a href="https://www.bw.com">https://www.bw.com</a>                     |
| <b>Canoe Pool</b>          | U.S.                      | 498.34                           | 135.8986         | <a href="https://www.canoepool.com">https://www.canoepool.com</a>       |
| <b>ConnectBTC</b>          | China                     | 661.73                           | 180.4554         | <a href="https://www.connectbtc.com/#">https://www.connectbtc.com/#</a> |
| <b>DiscusFish / F2Pool</b> | U.S., China               | 580.04                           | 158.1783         | <a href="http://www.f2pool.com">http://www.f2pool.com</a>               |
| <b>Eligius</b>             | U.S.                      | 498.34                           | 135.8986         | <a href="http://eligius.st">http://eligius.st</a>                       |
| <b>EXX &amp; BW</b>        | China                     | 661.73                           | 180.4554         | <a href="https://xbtc.exx.com/">https://xbtc.exx.com/</a>               |
| <b>GBMiners</b>            | India                     | 706.44                           | 192.6479         | <a href="http://52.66.51.105/">http://52.66.51.105/</a>                 |
| <b>GoGreenLight</b>        | Sweden                    | 60.32                            | 16.44941         | <a href="http://www.gogreenlight.se/">http://www.gogreenlight.se/</a>   |
| <b>HaoBTC</b>              | China                     | 661.73                           | 180.4554         | <a href="https://haobtc.com/">https://haobtc.com/</a>                   |
| <b>Kano CKPool</b>         | Global                    | 573.86                           | 156.493          | <a href="http://www.kano.is">http://www.kano.is</a>                     |
| <b>MMPool</b>              | Global                    | 573.86                           | 156.493          | <a href="http://mmpool.org">http://mmpool.org</a>                       |
| <b>NA</b>                  | Global                    | 573.86                           | 156.493          | ForBlocksWithNoCompany                                                  |
| <b>NiceHashSolo</b>        | Global                    | 573.86                           | 156.493          | <a href="https://solo.nicehash.com/">https://solo.nicehash.com/</a>     |
| <b>P2Pool.org</b>          | Global                    | 573.86                           | 156.493          | <a href="http://p2pool.org">http://p2pool.org</a>                       |
| <b>Slush</b>               | Global                    | 573.86                           | 156.493          | <a href="https://mining.Bitcoin.cz">https://mining.Bitcoin.cz</a>       |
| <b>Solo CKPool</b>         | Global                    | 573.86                           | 156.493          | <a href="http://solo.ckpool.org">http://solo.ckpool.org</a>             |
| <b>Telco 214</b>           | U.S.                      | 498.34                           | 135.8986         | <a href="http://www.telco214.com/">http://www.telco214.com/</a>         |
| <b>ViaBTC</b>              | China                     | 661.73                           | 180.4554         | <a href="http://www.viabtc.com/">http://www.viabtc.com/</a>             |

## Step 2: Energy consumption of Bitcoin:

After loading the data, we first converted the unit so all the data are in the same metrics level. After that, we merged all the information and then calculated the energy consumed per total hashes in each block. Consequently, we estimated carbon emissions from the given block in tons of Carbon. Finally, we displayed the result per country based on the server location as illustrated in Figure 3.

```
for i in range(iterations):
    efficiencies = processors_df.sample(n=merged_df.shape[0], replace=True).reset_index()
    #pd.DataFrame(efficiencies).to_csv("C:/Users/LENOVO/Desktop/Datasource/efficienciesTest1.csv")
    simulation_df = pd.concat([merged_df, efficiencies], axis=1)

    # Energy consumed
    simulation_df["TotalGwhInBlock"] = (simulation_df["Hashes"] / simulation_df["HashesPerJ"]) * (2.78 * (10 ** -13))
    simulation_df["TotalTwhInBlock"] = simulation_df["TotalGwhInBlock"] / 1000
    # Carbon-dioxide gas emitted
    simulation_df["CarboninGtnForBlock"] = simulation_df["TotalGwhInBlock"] * simulation_df["TonsOfCarbonPerGWh"] / (10 ** 9)
    # Energy consumed per total hashes in each block
    simulation_df["EnergyPerHashes"] = simulation_df["TotalGwhInBlock"] * (10**9) / simulation_df["Hashes"]

    total_carbon_emissions = simulation_df["CarboninGtnForBlock"].sum()
    emissions.append(total_carbon_emissions)
    total_energy_consumptions = simulation_df["TotalTwhInBlock"].sum()
    energy_consumptions.append(total_energy_consumptions)

    grouped_df = simulation_df.groupby(["Known_Server_Location"])
    #pd.DataFrame(grouped_df).to_csv("C:/Users/LENOVO/Desktop/Datasource/groupedTest2.csv")
    grouped_df = grouped_df.sum()

    #pd.DataFrame(grouped_df).to_csv("C:/Users/LENOVO/Desktop/Datasource/groupedTest2.csv")
    emissions_energy_per_country.append(grouped_df[["CarboninGtnForBlock", "TotalTwhInBlock", "EnergyPerHashes"]].reset_index(drop=False))
```

Figure 3: Screenshot of the source code that energy consumption of Bitcoin

### 3.2.2. Results

In Table 3, the energy consumption used for Bitcoin mining is provided as well as the percentage of mean energy per country. The mean and standard deviation of the energy consumption for 1,000 iterations in 2020 were 55.575156623000346 TWh/yr +/- 0.026148636138702892. Moreover, Table 3 is in line with Table 2, demonstrating that the vast majority of consumed energy occurred in China, followed by the US. More precisely, China consumed 42.207 TWh, which comprises more than 75% of the total energy consumed. The next biggest consumer is the US with 8.954320183 TWh/yr, which is approximately 16.1% of total consumption. Comparably, unknown servers consumed 3.958248079 TWh/yr, which is almost 7%.

Table 3. Energy consumption by country for 2020

| Years          | Energy consumption TWh | Percentage Consumption (%) |
|----------------|------------------------|----------------------------|
| China          | 42.20706448            | 75.945                     |
| Finland        | 0.151841293            | 0.273                      |
| Georgia        | 0.151841293            | 0.273                      |
| Unknow Servers | 3.958248079            | 7.122                      |
| Iceland        | 0.151841293            | 0.273                      |
| U.S.           | 8.954320183            | 16.112                     |
| <b>Total</b>   | 55.57515662            | 100                        |

The total global annual consumption of energy is shown in Table 4, confirming the results of Köhler, Susanne, and Massimo Pizzol<sup>9</sup> (31,29 TWh/yr) and of Alex de Vries<sup>13</sup> (22–67 TWh/yr). It shows a constantly increasing trend from 2015 when the total energy consumption was 0.152 TWh. However, a striking increase has occurred starting from 2018. To illustrate, the total consumption in 2017 was 4.97 TWh, and it dramatically increased to 22.462 TWh in 2018, 38.907 TWh in 2019, and 55.57 TWh in 2020. It is expected that this trend will continue in the upcoming years.

*Table 4. Global annual energy consumption of Bitcoin*

| Years | Energy consumption TWh |
|-------|------------------------|
| 2015  | 0.15209092427180862    |
| 2016  | 1.2281897287226884     |
| 2017  | 4.976362706069375      |
| 2018  | 22.46275130593014      |
| 2019  | 38.90745271604894      |
| 2020  | 55.575156623000346     |

## 4. Estimation of the Carbon Footprint of Bitcoin

Related Folder: Document\Chapitre-2\ N1-MRIO-LCSAModel

### 4.1. Carbon Footprint for Electricity Generation by sector

#### 4.1.1. Method

The calculation of a carbon footprint occurring from electricity generation by Bitcoin-mining countries is estimated using EXIOBASE 3.4<sup>14</sup>. Electricity can be generated using nuclear power, wind, gas petrol, and coal, but also other resources. Thus, It is important to determine which resource a particular country uses in order to estimate its carbon emissions from electricity generation as each source has different emission intensity per kWh of electricity generation. The global EXIOBASE 3.4 database<sup>14</sup> was selected because it comprises numerous social, economic, environmental, and sustainability factors related to electricity generation by source, encompassing the supply-chain of the electricity generation by source, by country, and by industrial sector. It provides a time series of symmetric multinational input-output tables encompassing 43 countries, 5 rest of the world regions, and 163 industries, covering approximately the entire global economy. These tables are based on raw data obtained from Eurostat, Comtrade, UN System of National Accounts, and national agencies<sup>15</sup>. Stadler et al. <sup>15</sup> provide a comprehensive discussion on methodological aspects of MRIO. The MRIO model is constructed as by using Leontief's inverse formula to show inputs and outputs:

*Equation 1: Leontief's inverse formula*

$$\mathbf{X} = (\mathbf{I} - \mathbf{A})^{-1} * \mathbf{y}$$

Where, an output vector,  $\mathbf{x}$ , represents a function of  $\mathbf{I}$ ,  $\mathbf{A}$ , and  $\mathbf{y}$ ;  $\mathbf{y}$  denotes the column vector of the total demand (in M. Euro),  $\mathbf{A}$  denotes the input/output coefficient matrix (in M. Euro/M. Euro),  $\mathbf{I}$  denotes the identity matrix, and  $\mathbf{x}$  denotes the column vector of total output (in M. Euro). The term  $(\mathbf{I} - \mathbf{A})^{-1}$  is the Leontief inverse, where  $\mathbf{L}$  represents the total requirements matrix. In the direct

requirement matrix of A, each element represents the total inputs necessary to fabricate one output unit per sector.

This relationship, socioeconomic factors (e.g., value-added tax, income, employment rate, and tax), and sector-specific environmental satellite factors (e.g., resource use, carbon emissions, water consumption, energy use) were analysed in a global MRIO model to access impacts related to an output unit of a given sector and indirect impacts of the global supply chains of the industry. We used the total requirement matrix to perform this analysis. In Equation (2), a B represents a vector of social, economic, and environmental impacts created per industry per economic output unit (M. Euro):

*Equation 2: Environmental, economic and social impacts per industry per economic output unit (M. Euro)*

$$B = E * (diag(x)) - 1$$

Here, the totals are denoted with x (in M. Euro) and E represents the satellite accounts. Thus, B represents the matrix of intensities per M. Euro. With diagonal, I shows that it is necessary to diagonalize the vector x. We multiplied B of Equation (1) by L and y to obtain Equation (3) as follows:

*Equation 3: Quantification of the direct and indirect social, economic and environmental impacts sectors*

$$r = BLy$$

In this Equation, we multiplied by B (intensity matrix per unit of output) to calculate the r vector. Subsequently, we multiplied the r factor by y (the total output of each sector (final output vector)). After that, we used the r vector to quantify both direct and indirect environmental, economic, and social impacts per sector. Finally, we calculate the carbon footprint impacts of the regional and international supply chains. A powerful Python programming language was used to carry out all matrix operations of big matrix data and sectorial multipliers for ten energy sources are listed in Table 5.

*Table 5. Electricity production by source*

| Source                                             | Unit |
|----------------------------------------------------|------|
| Electricity by coal                                | TJ   |
| Electricity by gas                                 | TJ   |
| Electricity by nuclear                             | TJ   |
| Electricity by hydro                               | TJ   |
| Electricity by wind                                | TJ   |
| Electricity by petroleum and other oil derivatives | TJ   |
| Electricity by biomass and waste                   | TJ   |
| Electricity by solar photovoltaic                  | TJ   |
| Electricity by solar thermal                       | TJ   |
| Electricity by tide, wave and ocean                | TJ   |
| Electricity by Geothermal                          | TJ   |



#### 4.1.2. Results

Figure 4 shows a screenshot of the part generated file. Figure 4 displays the GHG emissions per Million Euro output of each electricity sector provided in Table 5 for each mining country. Figure 4 shows an example output of this step.

For all result of this step please see;

Related Folder: Document\Chaptre-2\N1-MRIO-LCSAModel

| Abreviation | Sector                | CO2 - combustion - air(air-kg) | CH4 - combustion - air(air-kg) | N2O - combustion - air(air-kg) |
|-------------|-----------------------|--------------------------------|--------------------------------|--------------------------------|
| CN          | Electricity by coal   | 24118847.76                    | 255.7464318                    | 841.3677882                    |
| CN          | Other Bituminous C    | 262125.0284                    | 4.337452792                    | 8.155646963                    |
| CN          | Basic iron and steel  | 81923.84043                    | 12.45610171                    | 0.477637363                    |
| CN          | Steam and hot water   | 24828.79037                    | 0.495026713                    | 0.839828438                    |
| CN          | Other non-metallic    | 11248.44819                    | 0.248067262                    | 0.162817433                    |
| CN          | Coke Oven Coke        | 10052.67771                    | 1.659153646                    | 0.249724094                    |
| CN          | Rubber and plastic    | 9672.216859                    | 1.008277706                    | 0.01398232                     |
| CN          | Air transport service | 7025.701142                    | 0.161808632                    | 0.273299967                    |
| CN          | Chemicals nec         | 5966.967248                    | 0.644660034                    | 0.07700643                     |
| CN          | Coking Coal           | 5480.276696                    | 0.090683597                    | 0.170510997                    |
| RU          | Other Bituminous C    | 5399.188529                    | 0.074845764                    | 0.08306013                     |
| CN          | Other business serv   | 5211.830486                    | 0.851275328                    | 0.048797387                    |
| CN          | Supporting and aux    | 5151.508507                    | 0.598559199                    | 0.086737968                    |
| CN          | Sea and coastal wat   | 4886.710154                    | 0.444831238                    | 0.017808327                    |
| CN          | Crude petroleum ai    | 4851.92831                     | 1.374437205                    | 0.025146993                    |
| ID          | Sub-Bituminous Co     | 4345.455751                    | 0.045461989                    | 0.067515718                    |
| CN          | Inland water transp   | 3813.756388                    | 0.356606836                    | 0.070066695                    |
| CN          | Electricity by gas    | 3557.976173                    | 1.944614425                    | 0.006345521                    |
| CN          | Railway transportat   | 3538.292057                    | 0.202735213                    | 0.068570079                    |

Figure 4: Screenshot of the part generated file that contains greenhouse gas emissions caused by electricity generation in China (The table involves all the global supply-chain sectors involved electricity generation in China)

## 4.2. Carbon Footprint for Electricity Generation of the Bitcoin-mining countries

### 4.2.1. Method:

The purpose of this part was to estimate the footprint by calculating the Global Warming Potential (GWP). It measures how much energy the emissions of 1 ton of a gas will absorb over a given period, relative to the emissions of 1 ton of carbon dioxide (CO<sub>2</sub>).

In China, 65% of electricity generation in 2019 came from coal<sup>16,17</sup>, as shown in Table 6. All the other sources of power account for considerably lower amounts of total electricity generation. The electricity from hydroelectric power plants accounts for 17%. However, it is important to note that China has gradually increased the amount of electricity from renewable resources, such as wind power (5.4%), solar power (3%), and biomass (1.4%). The total Chinese renewable capacity in 2020 was 850 GW.

We multiplied the impact of each source by the percentage to calculate the impact of electricity generation using the following Equation (4):

Equation 4: Impact of electricity generation in country *I* per *M*. Euro

$$I_{i,me} = \sum_{k=0}^n (PIS_{k,i} \times IS_{k,i})$$

Where  $I_{i,me}$  is impact of electricity generation in country  $i$  per M. Euro.  $PIS_{k,i}$  is the percentage of impact of energy source  $k$  in electricity generation in country  $i$ .  $IS_{k,i}$  is the impact of energy source  $k$  in electricity generation in country  $i$ .

In the case of China, the carbon footprint of electricity generation is calculated by following Equation (5)

*Equation 5: Impact of electricity generation in China per M. Euro*

$$I_{China,me} = 0,646 \times IS_{Coal,China} + 0,033 \times IS_{N.Gas,China} + 0,046 \times IS_{Nuclear,China} + 0,171 \times IS_{Hydro,China} + 0,054 \times IS_{Wind,China} + 0,03 \times IS_{Solar,China} + 0,014 \times IS_{Biomass,China} \cdot$$

*Table 6: Electricity Generation by the energy source in China*

| Source of electricity       | Electricity generation (%) |
|-----------------------------|----------------------------|
| <b>Coal</b>                 | 64.6%                      |
| <b>Hydro</b>                | 16.90%                     |
| <b>Wind</b>                 | 5.40%                      |
| <b>Nuclear</b>              | 4.60%                      |
| <b>Natural gas</b>          | 3.30%                      |
| <b>Solar</b>                | 3%                         |
| <b>Biomass</b>              | 1.40%                      |
| <b>Pumped storage hydro</b> | 0.40%                      |
| <b>Other thermal</b>        | 0.30%                      |

Next, we multiplied the carbon footprint of electricity generation per M. Euro by the cost of electricity generation to calculate the footprint by equivalent carbon dioxide using the EXIOBASES's MRIO model through the following Equation (6):

*Equation 6: Footprint of electricity generation in Country I per Kg/ kWh*

$$FEG_i = I_{i,me} \times CEG_i \times 10^{-6}$$

Where  $FEG_i$  is footprint of electricity generation in country  $i$  per Kg/ kWh  $I_{i,me}$  is the impact of electricity generation in country  $i$  per M. Euro.  $CEG_i$  is the cost generation of 1 kWh in country  $i$  in Euro .

Producer prices of electricity (\$2015 constant dollar) are shown in Table 7; we deducted tax and profit margin values from 2015. The prices are collected from multiple sources<sup>18,19</sup>

*Table 7: Costs of generating electricity by countries in Euro*

| Country              | India | China | USA   | Finland | Sweden | Iceland | Georgia |
|----------------------|-------|-------|-------|---------|--------|---------|---------|
| <b>Price in Euro</b> | 0.02  | 0.05  | 0.075 | 0.144   | 0.128  | 0.088   | 0.04    |



Global Warming Potentials (GWP) can be calculated by multiplying the impact metric in columns 6, 7, and 8, which show the combustion of CO<sub>2</sub>, CH<sub>4</sub>, and N<sub>2</sub>O in air, respectively, with the Global Warming Potentials presented by the UN Climate Change<sup>20</sup> and illustrated in Table 8.

*Table 8: Global Warming Potentials (IPCC Second Assessment Report)*

| Industrial designation | Chemical formula | GWP values for X-year time horizon |           |           |
|------------------------|------------------|------------------------------------|-----------|-----------|
|                        |                  | 20 years                           | 100 years | 500 years |
| <b>Carbon dioxide</b>  | CO <sub>2</sub>  | 1                                  | 1         | 1         |
| <b>Methane</b>         | CH <sub>4</sub>  | 56                                 | 21        | 6.5       |
| <b>Nitrous oxide</b>   | N <sub>2</sub> O | 280                                | 310       | 170       |

GWP values of electricity generation in China for the 100-year period is calculated following the Equation (7):

*Equation 7: Global Warming Potentials of electricity generation in country I per*

$$GWP100_{e,i} = \sum_{k=0}^n ID_{i,k} \times GWP100_{i,k}$$

Where  $GWP100_{e,i}$  is GWP100 of electricity generation  $e$  in country  $i$  in  $Kg\ CO_2\text{-eqv per kWh}$ .  $ID_{i,k}$  is Industrial designation or common name of Species  $k$  in country  $i$ .  $GWP100_{i,k}$  is global warming potentials species  $k$  in country  $i$ .

The  $GWP_{100}$  for the other countries such as the U.S, India, Iceland, Finland, Sweden, and Georgia is calculated using the same methodology using the information:

a) USA

In the U.S, electricity is primarily generated by fossil fuels. In 2019, natural gas accounted for approximately 38% of electricity generation in the U.S<sup>21</sup>. Electricity is generated from natural gas using gas turbines and steam turbines. Natural gas is followed by coal as the energy source, accounting for one-quarter of electricity generation as illustrated in Table 9. The majority of coal-fired power plants operate on steam turbines, whereas a minority first convert coal to gas to be further used in gas turbines. The third-largest energy source, nuclear energy, operating on the principle of nuclear fission, also employs steam turbines to generate electricity. Different renewable resources generate approximately 17% of electricity in the US. 7.3% of electricity is generated via wind power, followed by hydropower (7.3%) and solar power (1.8%). Moreover, the electricity generation in the US also uses petroleum as a source (1%). More precisely, petroleum coke and residual fuel oil generate electricity via steam turbines, whereas in the case of diesel fuel oil, electricity is generated using diesel-engine generators. In addition, it is also possible to burn distillates and residual fuel oil in gas turbines.

*Table 9: Electricity Generation by the energy source in USA*

| Source of electricity | Electricity generation (%) |
|-----------------------|----------------------------|
| <b>Natural gas</b>    | 38.4%                      |
| <b>Coal</b>           | 23.5%                      |

|                   |       |
|-------------------|-------|
| <b>Nuclear</b>    | 19.7% |
| <b>Wind power</b> | 7.3%  |
| <b>Hydro</b>      | 6.6%  |
| <b>Solar</b>      | 1.8%  |
| <b>Biomass</b>    | 1.4%  |
| <b>Petroleum</b>  | 0.5%  |
| <b>Geothermal</b> | 0.4%  |
| <b>Other</b>      | 0.4%  |

#### a) India

India is both the third global largest producer and consumer of electricity. In November 2020, the capacity of the Indian national electric grid was 374.2 GW<sup>22</sup>. Table 10 shows that electricity generated from coal accounts for more than one half of Indian total electricity production. However, India also generates a significant amount of electricity from renewable resources. 12.2% of electricity generation is conducted by large hydro power plants, followed by wind power (10.2%), solar power (9.7%), gas (6.7%), and biomass (2.8%).

*Table 10: Electricity Generation by the energy source in India*

| <b>Source of electricity</b> | <b>Electricity generation (%)</b> |
|------------------------------|-----------------------------------|
| <b>Coal</b>                  | 53.4%                             |
| <b>Large Hydro</b>           | 12.2%                             |
| <b>Wind Power</b>            | 10.2%                             |
| <b>Solar</b>                 | 9.7%                              |
| <b>Gas</b>                   | 6.7%                              |
| <b>Biomass</b>               | 2.8%                              |
| <b>Nuclear</b>               | 1.8%                              |
| <b>Lignite</b>               | 1.7%                              |
| <b>Small Hydro</b>           | 1.3%                              |
| <b>Diesel</b>                | 0.1%                              |

#### b) Georgia

A total primary energy supply (TPES) in Georgia was 4.793 Mtoe in 2016<sup>23</sup>, whereas electricity generation was 11.5 TWh. Remarkably, natural gas is the main energy source of electricity generation in Georgia accounting for 43%, which is followed by oil (26%), hydropower (16%), and Biofuels (9%). The electricity from Coal plants accounts for 6% as shown in Table 11.

*Table 11: Electricity Generation by the energy source in Georgia*

| <b>Source of electricity</b> | <b>Electricity generation (%)</b> |
|------------------------------|-----------------------------------|
| Natural gas                  | 43%                               |
| Oil                          | 26%                               |
| Hydroelectric                | 16%                               |
| Biofuels and waste           | 9%                                |
| Coal                         | 6%                                |

#### c) Iceland

Iceland<sup>24</sup> is a unique country in the world as it uses a variety of renewable resources to meet all its needs for electricity (99.99%), considering that only 0.01% of its total energy generation comes from fossil fuels. The most important energy source is hydropower (71.03%), followed by geothermal sources (28.91%). In addition, Iceland also invests in wind power (0.04%) as illustrated in Table 12.

*Table 12: Electricity Generation by the energy source in Iceland*

| Source of electricity | Electricity generation (%) |
|-----------------------|----------------------------|
| Hydro power           | 71.03%                     |
| Geothermal            | 28.91%                     |
| Wind Power            | 0.04%                      |
| Fossil fuels          | 0.01%                      |

#### d) Sweden

Sweden is among the countries that are leaders in a low-carbon economy<sup>25</sup>. Among 30 members of the International Energy Agency (IEA), it had the second-lowest CO<sub>2</sub> emissions per capita and per GDP in 2017. Sweden is a signatory to the Energy Agreement and Climate Framework and its deadline for becoming a net-zero carbon economy in 2045. Its primary resources of electricity generation are nuclear power and hydropower. In 2019, hydropower accounted for 39.3% (65 TWh) of electricity generation, which is comparable to nuclear power with 39.1% (TWh). Moreover, wind power contributed with 12.1% (19.9 TWh) as shown in Table 13.

*Table 13: Electricity Generation by the energy source in Sweden*

| Source of electricity | Electricity generation (%) |
|-----------------------|----------------------------|
| Hydro power           | 39.3%                      |
| Nuclear               | 39.1%                      |
| Wind Power            | 12.1%                      |
| Other                 | 9.5%                       |

#### e) Finland

The Finnish electricity sector depends on cogeneration and import from Sweden (23.3%), forest industry black liquor and wood consumption, and nuclear power. In 2019, electricity generation<sup>26</sup> from two power plants at the shores of the Baltic sea accounted for 26.6% of the total production. In addition, electricity generation from hydropower accounted for 14.3%, followed by wood (13%) and wind power (7%) as illustrated in Table 14.

*Table 14: Electricity Generation by the energy source in Finland*

| Source of electricity | Electricity generation (%) |
|-----------------------|----------------------------|
| Nuclear               | 26.60%                     |
| Imports               | 23.30%                     |
| Hydro                 | 14.30%                     |
| Wood                  | 13.00%                     |
| Wind Power            | 7%                         |
| Coal                  | 4.90%                      |

|              |       |
|--------------|-------|
| <b>Gas</b>   | 4.50% |
| <b>Peat</b>  | 3.30% |
| <b>Other</b> | 2.70% |
| <b>Oil</b>   | 0.30% |
| <b>Solar</b> | 0.20% |

#### 4.2.2. Results

Table 15 shows total GWP100 per kWh of electricity generation in each Bitcoin mining country. This estimation includes the entire global supply-chain of electricity generation sectors in the associated countries thus providing a comprehensive estimate.

*Table 15: GWP kWh of Electricity generation sector for Bitcoin-mining countries*

| <b>Countries</b> | <b>GWP100<br/>(gram CO<sub>2</sub>-<br/>eqv per<br/>kWh)</b> |
|------------------|--------------------------------------------------------------|
| <b>China</b>     | 822.1                                                        |
| <b>USA</b>       | 653.135                                                      |
| <b>India</b>     | 882.203                                                      |
| <b>Finland</b>   | 379.934                                                      |
| <b>Georgia</b>   | 83.129                                                       |
| <b>Iceland</b>   | 17.353                                                       |

### 4.3. Carbon Footprint of Bitcoin Equipment

#### 4.3.1. Method

To estimate the carbon footprint indicators caused by the production of mining equipment per Million Euro Market, MRIO process for “Office machinery and computers (30)” in China was selected. Because, all the machines are produced in China. Thus, in order to estimate the average cost of the Mining Equipment production each year, we calculated the average Hashrate used in the Bitcoin network to determine the number of equipment used.

##### i. Mining Equipment specification:

According to Bendiksen et al.<sup>8,9</sup>, 79.9% of miners used Antminer S9 for modeling, followed by 7.6.% and 6.7% of miners who used Avalon 841 and Ebang E 10, respectively. The remaining 5.8% used other machines for modeling, as shown in Table :

- **Antminer S9** : Different versions and batches of Antminer S9s are available. However, it is not possible to know the exact distribution of these batches and versions. Therefore, the specifications of the only version currently available for sale were taken. They are of the Antminer S9i, which has four different batches. Assuming that all batches are on the market with an equal share, this leads to specifications of 13.75 TH/sec, 1321.25 W, and 4.2 kg.<sup>17</sup>
- **Avalon 841** : The specifications of the Avalon 841 are 14 TH/sec, 1290W, and 5.2kg.<sup>18</sup>
- **Ebang E10**: The specifications for the Ebang E10 miner are 18 TH/sec, 1650W, and 9.8kg.<sup>19</sup>
- **Other machines**: To obtain the same numbers for the remaining machines, a distribution had to be determined, which is shown in Table 16.

Table 16: Distribution of other mining equipment in this study

| Machine                         | Share    | Hashrate [TH/s] | Price (\$) |
|---------------------------------|----------|-----------------|------------|
| <b>Total</b>                    | 100.000% |                 |            |
| <b>Bitfily</b>                  | 0.578%   | 24.5            | 400        |
| <b>Bitfury Tardis</b>           | 0.578%   | 80              | 2000       |
| <b>Antminer S15</b>             | 11.561%  | 28              | 1700       |
| <b>Avalon 921</b>               | 43.353%  | 20              | 290        |
| <b>GMO Mining B2/B3</b>         | 9.249%   | 24              | 2000       |
| <b>DragonMint T1</b>            | 14.451%  | 16              | 2729       |
| <b>Innosilicon T2 Turbo</b>     | 5.780%   | 24              | 1300       |
| <b>MicroBT's Whatsminer M10</b> | 14.451%  | 33              | 2300       |

Thus, we determined following specifications of other machines:

- The hash rate is 23.26 TH/s.
- The electricity consumption is 1836.6 W.
- The average cost is \$1323. The average cost multiplied by 0.8 to estimate an average producer price in \$2015 dollar. Assuming that 20% of the sale price is for profit and taxes.

## ii. Average hash rate in the Bitcoin platform per year

We calculated the average hash rate in the Bitcoin platform per year, as shown in the Table 17.

Table 17: Average hash rate in the Bitcoin platform per year

| Year        | Average hash rate TH/s |
|-------------|------------------------|
| <b>2015</b> | 405341                 |
| <b>2016</b> | 1,532,974              |
| <b>2017</b> | 6,306,453              |
| <b>2018</b> | 36,403,242             |
| <b>2019</b> | 67,023,852             |
| <b>2020</b> | 119,864,038            |

i. Number of mining machine per year

The number of equipment used for Bitcoin mining per years can be calculated following Equation (8):

*Equation 8: Number of mining machine used per year*

$$NMM_t = \sum_{k=0}^n NMM_{k,t} = \sum_{k=0}^n (AH_t \times MPr_k) / (MSl_k \times H_k)$$

Where,  $NMM_t$  is the average number of mining machine used per year  $t$ .  $NMM_{t,k}$  is the average number of mining machine used per machine type  $k$  per year  $t$ .  $AH_t$  is average of hashrate per year  $t$ .  $MPr_k$  is the percentage of using machine type  $k$ .  $MSl_k$  is the service life of a machine  $k$ .  $H_k$  is the hashrate per machine type  $k$ .

The amount of equipment that is produced and hence needs to be disposed of is approximated using machine lifetime. According to Digiconomist<sup>27</sup>. Bitcoin mining equipment has an average lifetime of 1.5 years.

Par example for 2020 the estimated number of mining machine is

$$NMM_t = (119,864,038 \times 0.79) / (1.5 \times 14) + (119,864,038 \times 0.076) / (1.5 \times 11) + (119,864,038 \times 0.067) / (1.5 \times 18) + (119,864,038 \times 0.058) / (1.5 \times 23.26)$$

$NMM_t = 8414011$  machines.

ii. Cost of mining machine per year

The cost of the machine used for Bitcoin mining is calculated following Equation (9):

*Equation 9: Cost of machine used for Bitcoin mining per year.*

$$\text{Cost of mining machine per year} = \sum_{k=0}^n \text{NumberOfMachineUsed} * \text{Price Of Machine} * 0.8$$

$$CMM_t = \sum_{k=0}^n NMM_{t,k} \times MPri_k \times 0.8$$

Where,  $CMM_t$  is the cost of mining machines per year  $t$ .  $NMM_{t,k}$  is the average number of mining machine used per machine type  $k$  per year  $t$ .  $MPr_k$  is the prices of mining machine type  $k$ .

iii. Carbon footprint of mining equipment

The carbon footprint of mining equipment is calculated following the Equation (10):

*Equation 10: Carbon Footprint of Mining Equipment per Year*

$$CFME_t = CMM_t \times CFME$$

Where  $CFME_t$  is the carbon footprint of mining equipment per year  $t$ .  $CMM_t$  is the cost of mining machines per year  $t$ .  $CFME$  is the footprint of mining equipment per million euro.

#### 4.3.2. Results

Table 18: Carbon Footprint of Mining Equipment

| Years | Carbon Footprint of Mining Equipment<br>Per Transaction (gCO <sub>2</sub> -eqv.) | Total Carbon Footprint of Mining Equipment (Mt gCO <sub>2</sub> -eqv.)<br>Per year |
|-------|----------------------------------------------------------------------------------|------------------------------------------------------------------------------------|
| 2015  | 0.50                                                                             | 0.022885524                                                                        |
| 2016  | 1.09                                                                             | 0.089343288                                                                        |
| 2017  | 3.11                                                                             | 0.321840044                                                                        |
| 2018  | 23.84                                                                            | 1.947067268                                                                        |
| 2019  | 30.50                                                                            | 3.661283543                                                                        |
| 2020  | 53.36                                                                            | 6.006096182                                                                        |

#### 4.4. Carbon Footprint of Bitcoin energy consumption by country

##### 4.4.1. Method

###### a) Average electricity consumption per transaction

For estimating carbon footprint of a Bitcoin-mining in each the countries, It is required to calculate the average energy consumption per transaction. To do this, we followed Equation (11), where the total energy used in Bitcoin mining a given year is divided by the number of transactions in the same year.

Equation 11: Average energy consumption per transaction

$$AECTr_{i,t} = \frac{EC_{i,t}}{Tr_{i,t}}$$

Where,  $AECTr_{i,t}$  is annual electricity consumption per transaction in country  $i$  in year  $t$ .  $EC_{i,t}$  is the total annual electricity consumption for Bitcoin mining country  $i$  in year  $t$ .  $Tr_{i,t}$  is total annual number transaction in country  $i$  in year  $t$ .

Table 19 shows the number of transactions mined per year; there were 120,034,648 transactions mined in 2019.

Table 19: The number of transactions mined per year

| Years | Number of Transaction mined |
|-------|-----------------------------|
|-------|-----------------------------|

|             |             |
|-------------|-------------|
|             |             |
| <b>2015</b> | 45,343,445  |
| <b>2016</b> | 81,967,153  |
| <b>2017</b> | 103,593,217 |
| <b>2018</b> | 81,685,231  |
| <b>2019</b> | 120,034,648 |
| <b>2020</b> | 112,552,302 |

As an example, we calculate the average energy consumption per transaction for 2019  
Based on Table 4, the energy consumption consumed by the miners in 2019 is 38.90745272 (TWh).

Accordingly, we calculated the average energy consumption per transaction for 2019 as follows:

$$AECTr_{total,2019} = 120034648 / 38.90745272$$

$$AECTr_{total,2019} = 3.24135E-07 \text{ (TWH) per transaction}$$

$$AECTr_{total,2019} = 324.14 \text{ (kWh) per transaction}$$

**b) Average number of transactions mined in the mining countries:**

We used Equation (12) to calculate the average number of transactions mined per country.  
Accordingly, the total number of the transactions mined in a given year was multiplied by the percentage of energy consumed for mining Bitcoin:

*Equation 12: Average number of transactions mined per country*

$$ANTr_{i,t} = Tr_{i,t} \times MPr_{i,t}$$

Where,  $ANTr_{i,t}$  is average number of transactions mined in country  $i$  in year  $t$ .  $Tr_{i,t}$  is total annual number transaction mined in country  $i$  in year  $t$ .  $MPr_{i,t}$  is the mining percentage in country  $i$  in year  $t$ .

For example, we calculated the average number of transactions mined in 2019 in China as follows:

$$ANTr_{China,2019} = 120,034,648 * 0.72 = 85533777.22 \text{ Transaction}$$

**c) Annual Carbon footprint of Bitcoin energy consumption per country per transaction:**

We used Equation (13) to calculate annual carbon footprint of Bitcoin energy consumption for mining per country per transaction. Accordingly, the total number of the transactions mined in a given year was multiplied by the percentage of energy consumed for mining Bitcoin:

*Equation 13: Annual carbon footprint of Bitcoin electricity consumption per country per transaction*

$$AFECBMTr_{i,t} = AECTr_{i,t} \times GWP100_{e,i}$$

Where  $AFECBMTr_{i,t}$  is annual carbon footprint from electricity gene consumption ration of the Bitcoin-mining in country  $i$  in year  $t$  per transaction per kWh.  $AECTr_{i,t}$  is annual electricity



consumption per transaction in country  $i$  in year  $t$ .  $GWP100_{e,i}$  is GWP100 of electricity generation  $e$  in country  $i$ .

As an example, the annual carbon footprint of Bitcoin energy consumption per transaction mined in China for 2019:

$$AFECBMTr_{China,2019} = 324.1351839 * 0.813166656 = 263.5759237 \text{ (kWh) per transaction}$$

#### d) Annual Footprint of electricity needed for mining Bitcoin per Country:

Equation (14) is used to estimate the annual footprint of energy electricity needed for mining Bitcoin per country.

*Equation 14: Annual Footprint of Energy Electricity needed for mining Bitcoin per Country per kWh*

$$AFECBM_{i,t} = AFECBMTr_{i,t} \times Tr_{i,t}$$

Where  $AFECBM_{i,t}$  annual carbon footprint from electricity consumption of the Bitcoin-mining in country  $i$  in year  $t$  per kWh.  $AFECBMTr_{i,t}$  is annual carbon footprint from electricity generation of the Bitcoin-mining in country  $i$  in year  $t$  per transaction.  $Tr_{i,t}$  is total annual number transaction in country  $i$  in year  $t$

For example, we calculated the average number of transactions mined in China in 2019 as follows:

$$\begin{aligned} AFECBM_{China,2019} &= 85533777.22 * 263.5759237 \\ &= 22544644334.45 \text{ kWh} \end{aligned}$$

#### e) Annual for unknown servers

The results presented in Section 1.1 indicate that approximately 11 % of the transactions are mined via servers in unknown locations. Therefore, for calculating the footprint impact of mining for these transactions, it is necessary to compile electricity generation of the most important Bitcoin-mining countries and calculate the percentage of electricity generation per country.

Table 20 shows the list of countries by electricity production. The electricity production of China is 7.503,400 GWh, which accounts for 27.142% of global production, which is followed by the US (15.921%), India (5.638), and Russia (4.045%).

*Table 20: List of countries by electricity production*

|                      | Electricity production (GWh) | Percentage | Date of information |
|----------------------|------------------------------|------------|---------------------|
| <b>Total</b>         | 27385428                     | 100.000%   |                     |
| <b>China</b>         | 7503400                      | 27.399%    | 2019 <sup>27</sup>  |
| <b>United States</b> | 4401300                      | 16.072%    | 2019 <sup>27</sup>  |
| <b>India</b>         | 1558700                      | 5.692%     | 2019 <sup>27</sup>  |
| <b>Russia</b>        | 1118100                      | 4.083%     | 2019 <sup>27</sup>  |

|                                                   |         |        |                    |
|---------------------------------------------------|---------|--------|--------------------|
| <b>Japan</b>                                      | 1036300 | 3.784% | 2019 <sup>27</sup> |
| <b>Canada</b>                                     | 954400  | 3.485% | 2018 <sup>28</sup> |
| <b>South Korea</b>                                | 794300  | 2.900% | 2018 <sup>28</sup> |
| <b>Brazil</b>                                     | 688000  | 2.512% | 2018 <sup>28</sup> |
| <b>Germany</b>                                    | 648700  | 2.369% | 2018 <sup>28</sup> |
| <b>France</b>                                     | 574200  | 2.097% | 2018 <sup>28</sup> |
| <b>Saudi Arabia</b>                               | 383800  | 1.401% | 2018 <sup>28</sup> |
| <b>UK</b>                                         | 333900  | 1.219% | 2018 <sup>28</sup> |
| <b>Mexico</b>                                     | 332100  | 1.213% | 2018 <sup>28</sup> |
| <b>Iran</b>                                       | 310800  | 1.135% | 2018 <sup>28</sup> |
| <b>Turkey (see: Electricity sector in Turkey)</b> | 302500  | 1.105% | 2018 <sup>28</sup> |
| <b>Italy</b>                                      | 290600  | 1.061% | 2018 <sup>28</sup> |
| <b>Spain</b>                                      | 275000  | 1.004% | 2018 <sup>28</sup> |
| <b>Taiwan</b>                                     | 273600  | 0.999% | 2018 <sup>28</sup> |
| <b>Indonesia</b>                                  | 267300  | 0.976% | 2018 <sup>28</sup> |
| <b>Australia</b>                                  | 261400  | 0.955% | 2018 <sup>28</sup> |
| <b>South Africa</b>                               | 256000  | 0.935% | 2018 <sup>28</sup> |
| <b>Vietnam</b>                                    | 212900  | 0.777% | 2018 <sup>28</sup> |
| <b>Egypt</b>                                      | 200000  | 0.730% | 2018 <sup>28</sup> |
| <b>Thailand</b>                                   | 177600  | 0.649% | 2018 <sup>28</sup> |
| <b>Poland</b>                                     | 170100  | 0.621% | 2018 <sup>28</sup> |
| <b>Malaysia</b>                                   | 168400  | 0.615% | 2018 <sup>28</sup> |
| <b>Sweden</b>                                     | 163500  | 0.597% | 2018 <sup>28</sup> |
| <b>Ukraine</b>                                    | 159400  | 0.582% | 2018 <sup>28</sup> |
| <b>Norway</b>                                     | 147000  | 0.537% | 2018 <sup>28</sup> |
| <b>Argentina</b>                                  | 146600  | 0.535% | 2018 <sup>28</sup> |
| <b>Pakistan</b>                                   | 140600  | 0.513% | 2018 <sup>28</sup> |
| <b>UAE</b>                                        | 136900  | 0.500% | 2018 <sup>28</sup> |
| <b>Netherlands</b>                                | 117500  | 0.429% | 2018 <sup>28</sup> |
| <b>Kazakhstan</b>                                 | 107100  | 0.391% | 2018 <sup>28</sup> |
| <b>Iraq</b>                                       | 103300  | 0.377% | 2018 <sup>28</sup> |
| <b>Philippines</b>                                | 99800   | 0.364% | 2018 <sup>28</sup> |
| <b>Venezuela</b>                                  | 99200   | 0.362% | 2018 <sup>28</sup> |
| <b>Czech Republic</b>                             | 88000   | 0.321% | 2018 <sup>28</sup> |
| <b>Chile</b>                                      | 80200   | 0.293% | 2018 <sup>28</sup> |
| <b>Bangladesh</b>                                 | 79100   | 0.289% | 2018 <sup>28</sup> |
| <b>Colombia</b>                                   | 77400   | 0.283% | 2018 <sup>28</sup> |
| <b>Algeria</b>                                    | 76400   | 0.279% | 2018 <sup>28</sup> |
| <b>Belgium</b>                                    | 74600   | 0.272% | 2018 <sup>28</sup> |
| <b>Kuwait</b>                                     | 74200   | 0.271% | 2018 <sup>28</sup> |
| <b>Switzerland</b>                                | 69800   | 0.255% | 2018 <sup>28</sup> |
| <b>Finland</b>                                    | 69600   | 0.254% | 2018 <sup>28</sup> |

|                               |       |        |                    |
|-------------------------------|-------|--------|--------------------|
| <b>Israel</b>                 | 69600 | 0.254% | 2018 <sup>28</sup> |
| <b>Austria</b>                | 68200 | 0.249% | 2018 <sup>28</sup> |
| <b>Romania</b>                | 65200 | 0.238% | 2018 <sup>28</sup> |
| <b>Paraguay</b>               | 63700 | 0.233% | 2016 <sup>29</sup> |
| <b>Uzbekistan</b>             | 62400 | 0.228% | 2018 <sup>28</sup> |
| <b>Portugal</b>               | 59900 | 0.219% | 2018 <sup>28</sup> |
| <b>Peru</b>                   | 58817 | 0.215% | 2018 <sup>30</sup> |
| <b>Greece</b>                 | 54200 | 0.198% | 2018 <sup>28</sup> |
| <b>Singapore</b>              | 52900 | 0.193% | 2018 <sup>28</sup> |
| <b>Bulgaria</b>               | 45300 | 0.165% | 2017 <sup>31</sup> |
| <b>New Zealand</b>            | 44300 | 0.162% | 2018 <sup>28</sup> |
| <b>Qatar</b>                  | 39500 | 0.144% | 2018 <sup>28</sup> |
| <b>Serbia</b>                 | 38821 | 0.142% | 2017 <sup>32</sup> |
| <b>Belarus</b>                | 38800 | 0.142% | 2018 <sup>28</sup> |
| <b>Oman</b>                   | 37300 | 0.136% | 2018 <sup>28</sup> |
| <b>Hong Kong</b>              | 36700 | 0.134% | 2018 <sup>28</sup> |
| <b>Syria</b>                  | 35892 | 0.131% | 2018 <sup>21</sup> |
| <b>Libya</b>                  | 35450 | 0.129% | 2015 <sup>33</sup> |
| <b>Morocco</b>                | 34400 | 0.126% | 2018 <sup>28</sup> |
| <b>Denmark</b>                | 33716 | 0.123% | 2017 <sup>34</sup> |
| <b>Hungary</b>                | 32000 | 0.117% | 2018 <sup>28</sup> |
| <b>Ireland</b>                | 30400 | 0.111% | 2016 <sup>29</sup> |
| <b>Ecuador</b>                | 29400 | 0.107% | 2018 <sup>28</sup> |
| <b>Nigeria</b>                | 28000 | 0.102% | 2018 <sup>35</sup> |
| <b>Slovakia</b>               | 27500 | 0.100% | 2018 <sup>22</sup> |
| <b>Azerbaijan</b>             | 25200 | 0.092% | 2018 <sup>28</sup> |
| <b>Turkmenistan</b>           | 24200 | 0.088% | 2018 <sup>28</sup> |
| <b>North Korea</b>            | 20992 | 0.077% | 2018 <sup>28</sup> |
| <b>Puerto Rico</b>            | 20015 | 0.073% | 2018 <sup>28</sup> |
| <b>Iceland</b>                | 18550 | 0.068% | 2018 <sup>35</sup> |
| <b>Cuba</b>                   | 16745 | 0.061% | 2018 <sup>28</sup> |
| <b>Mozambique</b>             | 16661 | 0.061% | 2018 <sup>28</sup> |
| <b>Slovenia</b>               | 16500 | 0.060% | 2018 <sup>22</sup> |
| <b>Kyrgyzstan</b>             | 16035 | 0.059% | 2018 <sup>28</sup> |
| <b>Sri Lanka</b>              | 15500 | 0.057% | 2018 <sup>28</sup> |
| <b>Lebanon</b>                | 15423 | 0.056% | 2018 <sup>28</sup> |
| <b>Ethiopia</b>               | 15192 | 0.055% | 2020 <sup>3</sup>  |
| <b>Tajikistan</b>             | 14956 | 0.055% | 2018 <sup>28</sup> |
| <b>Tunisia</b>                | 14762 | 0.054% | 2012 <sup>36</sup> |
| <b>Bosnia and Herzegovina</b> | 14472 | 0.053% | 2017 <sup>37</sup> |
| <b>Dominican Republic</b>     | 14367 | 0.052% | 2015 <sup>8</sup>  |
| <b>Bahrain</b>                | 13086 | 0.048% | 2018 <sup>28</sup> |

|                                           |       |        |                    |
|-------------------------------------------|-------|--------|--------------------|
| <b>Jordan</b>                             | 12998 | 0.047% | 2018 <sup>28</sup> |
| <b>Croatia</b>                            | 12820 | 0.047% | 2016 <sup>35</sup> |
| <b>Laos</b>                               | 12242 | 0.045% | 2018 <sup>28</sup> |
| <b>Estonia</b>                            | 12176 | 0.044% | 2016 <sup>35</sup> |
| <b>Georgia</b>                            | 11574 | 0.042% | 2016 <sup>35</sup> |
| <b>Zambia</b>                             | 11338 | 0.041% | 2015 <sup>8</sup>  |
| <b>Ghana</b>                              | 10906 | 0.040% | 2018 <sup>28</sup> |
| <b>Trinidad and Tobago</b>                | 10300 | 0.038% | 2018 <sup>28</sup> |
| <b>Uruguay</b>                            | 10161 | 0.037% | 2018 <sup>28</sup> |
| <b>Costa Rica</b>                         | 9888  | 0.036% | 2018 <sup>28</sup> |
| <b>Côte d'Ivoire</b>                      | 9796  | 0.036% | 2017 <sup>38</sup> |
| <b>Kenya</b>                              | 9258  | 0.034% | 2015 <sup>39</sup> |
| <b>Sudan (both Sudan and South Sudan)</b> | 8917  | 0.033% | 2018 <sup>28</sup> |
| <b>Guatemala</b>                          | 8361  | 0.031% | 2018 <sup>28</sup> |
| <b>Congo, Democratic Republic of the</b>  | 7802  | 0.028% | 2018 <sup>28</sup> |
| <b>Armenia</b>                            | 7763  | 0.028% | 2017 <sup>40</sup> |
| <b>Panama</b>                             | 7642  | 0.028% | 2018 <sup>28</sup> |
| <b>Zimbabwe</b>                           | 7297  | 0.027% | 2018 <sup>28</sup> |
| <b>Burma</b>                              | 7144  | 0.026% | 2018 <sup>28</sup> |
| <b>Bhutan</b>                             | 6976  | 0.025% | 2018 <sup>28</sup> |
| <b>Bolivia</b>                            | 6835  | 0.025% | 2018 <sup>28</sup> |
| <b>Honduras</b>                           | 6712  | 0.025% | 2018 <sup>28</sup> |
| <b>Latvia</b>                             | 6425  | 0.023% | 2016 <sup>35</sup> |
| <b>El Salvador</b>                        | 5992  | 0.022% | 2018 <sup>28</sup> |
| <b>Kosovo</b>                             | 5906  | 0.022% | 2017 <sup>41</sup> |
| <b>Cameroon</b>                           | 5857  | 0.021% | 2018 <sup>28</sup> |
| <b>Yemen</b>                              | 5834  | 0.021% | 2018 <sup>28</sup> |
| <b>Mongolia</b>                           | 5802  | 0.021% | 2016 <sup>42</sup> |
| <b>North Macedonia</b>                    | 5629  | 0.021% | 2016 <sup>35</sup> |
| <b>Angola</b>                             | 5512  | 0.020% | 2018 <sup>28</sup> |
| <b>Moldova</b>                            | 5456  | 0.020% | 2018 <sup>28</sup> |
| <b>Tanzania</b>                           | 5115  | 0.019% | 2018 <sup>28</sup> |
| <b>Cyprus</b>                             | 4887  | 0.018% | 2016 <sup>35</sup> |
| <b>Jamaica</b>                            | 4745  | 0.017% | 2018 <sup>28</sup> |
| <b>Albania</b>                            | 4525  | 0.017% | 2017 <sup>43</sup> |
| <b>Lithuania</b>                          | 4266  | 0.016% | 2016 <sup>35</sup> |
| <b>Senegal</b>                            | 3921  | 0.014% | 2017 <sup>44</sup> |
| <b>Nicaragua</b>                          | 3522  | 0.013% | 2018 <sup>28</sup> |
| <b>Brunei</b>                             | 3500  | 0.013% | 2018 <sup>28</sup> |
| <b>Botswana</b>                           | 3449  | 0.013% | 2015 <sup>37</sup> |

|                               |      |        |                    |
|-------------------------------|------|--------|--------------------|
| <b>Papua New Guinea</b>       | 3325 | 0.012% | 2018 <sup>28</sup> |
| <b>Nepal</b>                  | 3279 | 0.012% | 2018 <sup>28</sup> |
| <b>Montenegro</b>             | 3141 | 0.011% | 2016 <sup>35</sup> |
| <b>Reunion</b>                | 2841 | 0.010% | 2018 <sup>28</sup> |
| <b>Mauritius</b>              | 2627 | 0.010% | 2018 <sup>28</sup> |
| <b>Uganda</b>                 | 2493 | 0.009% | 2018 <sup>28</sup> |
| <b>New Caledonia</b>          | 2430 | 0.009% | 2018 <sup>28</sup> |
| <b>Malta</b>                  | 2250 | 0.008% | 2016 <sup>45</sup> |
| <b>Luxembourg</b>             | 2196 | 0.008% | 2016 <sup>35</sup> |
| <b>Bahamas</b>                | 2190 | 0.008% | 2018 <sup>28</sup> |
| <b>Malawi</b>                 | 2069 | 0.008% | 2018 <sup>28</sup> |
| <b>Guam</b>                   | 1734 | 0.006% | 2018 <sup>28</sup> |
| <b>Gabon</b>                  | 1702 | 0.006% | 2018 <sup>28</sup> |
| <b>Martinique</b>             | 1702 | 0.006% | 2018 <sup>28</sup> |
| <b>Guadeloupe</b>             | 1650 | 0.006% | 2018 <sup>28</sup> |
| <b>Suriname</b>               | 1600 | 0.006% | 2018 <sup>28</sup> |
| <b>Namibia</b>                | 1585 | 0.006% | 2018 <sup>28</sup> |
| <b>Madagascar</b>             | 1340 | 0.005% | 2018 <sup>28</sup> |
| <b>Netherlands Antilles</b>   | 1287 | 0.005% | 2018 <sup>28</sup> |
| <b>Congo, Republic of the</b> | 1255 | 0.005% | 2018 <sup>28</sup> |
| <b>Barbados</b>               | 1002 | 0.004% | 2018 <sup>28</sup> |
| <b>U.S. Virgin Islands</b>    | 996  | 0.004% | 2018 <sup>28</sup> |
| <b>Cambodia</b>               | 991  | 0.004% | 2018 <sup>28</sup> |
| <b>Aruba</b>                  | 980  | 0.004% | 2018 <sup>28</sup> |
| <b>Guinea</b>                 | 950  | 0.003% | 2018 <sup>28</sup> |
| <b>Mauritania</b>             | 930  | 0.003% | 2018 <sup>28</sup> |
| <b>French Guiana</b>          | 885  | 0.003% | 2018 <sup>28</sup> |
| <b>Fiji</b>                   | 836  | 0.003% | 2018 <sup>28</sup> |
| <b>Afghanistan</b>            | 833  | 0.003% | 2018 <sup>28</sup> |
| <b>Macau</b>                  | 833  | 0.003% | 2018 <sup>28</sup> |
| <b>French Polynesia</b>       | 825  | 0.003% | 2018 <sup>28</sup> |
| <b>Guyana</b>                 | 725  | 0.003% | 2018 <sup>28</sup> |
| <b>Lesotho</b>                | 700  | 0.003% | 2018 <sup>28</sup> |
| <b>Bermuda</b>                | 674  | 0.002% | 2018 <sup>28</sup> |
| <b>Haiti</b>                  | 652  | 0.002% | 2018 <sup>28</sup> |
| <b>Cayman Islands</b>         | 594  | 0.002% | 2018 <sup>28</sup> |
| <b>Burkina Faso</b>           | 579  | 0.002% | 2018 <sup>28</sup> |
| <b>Greenland</b>              | 538  | 0.002% | 2016 <sup>46</sup> |
| <b>Palestine</b>              | 535  | 0.002% | 2018 <sup>28</sup> |
| <b>Rwanda</b>                 | 525  | 0.002% | 2016 <sup>46</sup> |
| <b>Mali</b>                   | 520  | 0.002% | 2018 <sup>28</sup> |
| <b>Equatorial Guinea</b>      | 500  | 0.002% | 2016 <sup>46</sup> |

|                                         |     |        |                    |
|-----------------------------------------|-----|--------|--------------------|
| <b>Niger</b>                            | 495 | 0.002% | 2016 <sup>46</sup> |
| <b>Belize</b>                           | 452 | 0.002% | 2018 <sup>28</sup> |
| <b>Eritrea</b>                          | 416 | 0.002% | 2016 <sup>46</sup> |
| <b>Djibouti</b>                         | 406 | 0.001% | 2016 <sup>46</sup> |
| <b>Maldives</b>                         | 402 | 0.001% | 2016 <sup>46</sup> |
| <b>Eswatini</b>                         | 381 | 0.001% | 2016 <sup>46</sup> |
| <b>Saint Lucia</b>                      | 369 | 0.001% | 2016 <sup>46</sup> |
| <b>Somalia</b>                          | 339 | 0.001% | 2016 <sup>46</sup> |
| <b>Benin</b>                            | 335 | 0.001% | 2016 <sup>46</sup> |
| <b>Antigua and Barbuda</b>              | 331 | 0.001% | 2016 <sup>46</sup> |
| <b>Faroe Islands</b>                    | 306 | 0.001% | 2016 <sup>46</sup> |
| <b>Gambia</b>                           | 304 | 0.001% | 2016 <sup>46</sup> |
| <b>Burundi</b>                          | 304 | 0.001% | 2016 <sup>46</sup> |
| <b>Liberia</b>                          | 300 | 0.001% | 2016 <sup>46</sup> |
| <b>Sierra Leone</b>                     | 300 | 0.001% | 2016 <sup>46</sup> |
| <b>Gibraltar</b>                        | 239 | 0.001% | 2016 <sup>46</sup> |
| <b>Turks and Caicos Islands</b>         | 235 | 0.001% | 2016 <sup>46</sup> |
| <b>Togo</b>                             | 233 | 0.001% | 2016 <sup>46</sup> |
| <b>Chad</b>                             | 224 | 0.001% | 2016 <sup>46</sup> |
| <b>Saint Kitts and Nevis</b>            | 208 | 0.001% | 2016 <sup>46</sup> |
| <b>Grenada</b>                          | 202 | 0.001% | 2016 <sup>46</sup> |
| <b>Central African Republic</b>         | 171 | 0.001% | 2016 <sup>46</sup> |
| <b>American Samoa</b>                   | 169 | 0.001% | 2016 <sup>46</sup> |
| <b>Saint Vincent and the Grenadines</b> | 157 | 0.001% | 2016 <sup>46</sup> |
| <b>Samoa</b>                            | 132 | 0.000% | 2016 <sup>46</sup> |
| <b>Dominica</b>                         | 111 | 0.000% | 2016 <sup>46</sup> |
| <b>Solomon Islands</b>                  | 103 | 0.000% | 2016 <sup>46</sup> |
| <b>Sao Tome and Principe</b>            | 66  | 0.000% | 2016 <sup>46</sup> |
| <b>Tonga</b>                            | 52  | 0.000% | 2016 <sup>46</sup> |
| <b>Saint Pierre and Miquelon</b>        | 46  | 0.000% | 2016 <sup>46</sup> |
| <b>Comoros</b>                          | 42  | 0.000% | 2016 <sup>46</sup> |
| <b>Guinea-Bissau</b>                    | 39  | 0.000% | 2016 <sup>46</sup> |
| <b>Kiribati</b>                         | 29  | 0.000% | 2016 <sup>46</sup> |
| <b>Montserrat</b>                       | 24  | 0.000% | 2016 <sup>46</sup> |
| <b>Falkland Islands</b>                 | 19  | 0.000% | 2016 <sup>46</sup> |
| <b>Saint Helena</b>                     | 7   | 0.000% | 2016 <sup>46</sup> |
| <b>Niue</b>                             | 3   | 0.000% | 2016 <sup>46</sup> |

The Global Energy and CO<sub>2</sub> Status Report [48] states the average carbon emission of electricity produced in 2018 was 475 gCO<sub>2</sub>/kWh, which represents an increase of 10% from 2010. In terms of intensity, this contributed to the significantly lower global CO<sub>2</sub> emission. Without this improvement, global CO<sub>2</sub> emissions would have been 11% higher than current power sector emissions. To estimate the emission of electricity generated, we divided the average carbon emission of electricity by the percentage of electricity production. Hence, the emission of electricity generated is multiplied by the emission of electricity generated to calculate the annual Carbon emission per transaction. Furthermore, we multiplied the annual carbon emission per transaction by the number of transactions to calculate the annual carbon emission distribution.

#### 4.4.2. Results

##### a) Total Carbon footprint of Bitcoin mining energy consumption

Table 21: GWP of Bitcoin mining energy consumption per transaction by country by year

| Countries             | GWP per transaction per year (kgCO <sub>2</sub> -eqv.) |        |        |         |         |         |
|-----------------------|--------------------------------------------------------|--------|--------|---------|---------|---------|
|                       | 2015                                                   | 2016   | 2017   | 2018    | 2019    | 2020    |
| <b>China</b>          | 5.005                                                  | 12.318 | 39.492 | 226.071 | 266.472 | 405.930 |
| <b>U.S.</b>           | 3.976                                                  | 9.787  | 31.375 | 179.607 | 211.704 | 322.500 |
| <b>Unknown server</b> | 2.892                                                  | 7.117  | 22.818 | 130.621 | 153.964 | 234.542 |
| <b>Finland</b>        | 2.313                                                  | 5.693  | 18.251 | 104.479 | 123.150 | 187.601 |
| <b>Georgia</b>        | 0.506                                                  | 1.246  | 3.993  | 22.860  | 26.945  | 41.047  |
| <b>Iceland</b>        | 0.106                                                  | 0.260  | 0.834  | 4.772   | 5.625   | 8.569   |
| <b>India</b>          | 0.000                                                  | 13.219 | 42.379 | 242.598 | 0.000   | 0.000   |
| <b>Sweden</b>         | 0.000                                                  | 0.259  | 0.831  | 0.000   | 0.000   | 0.000   |

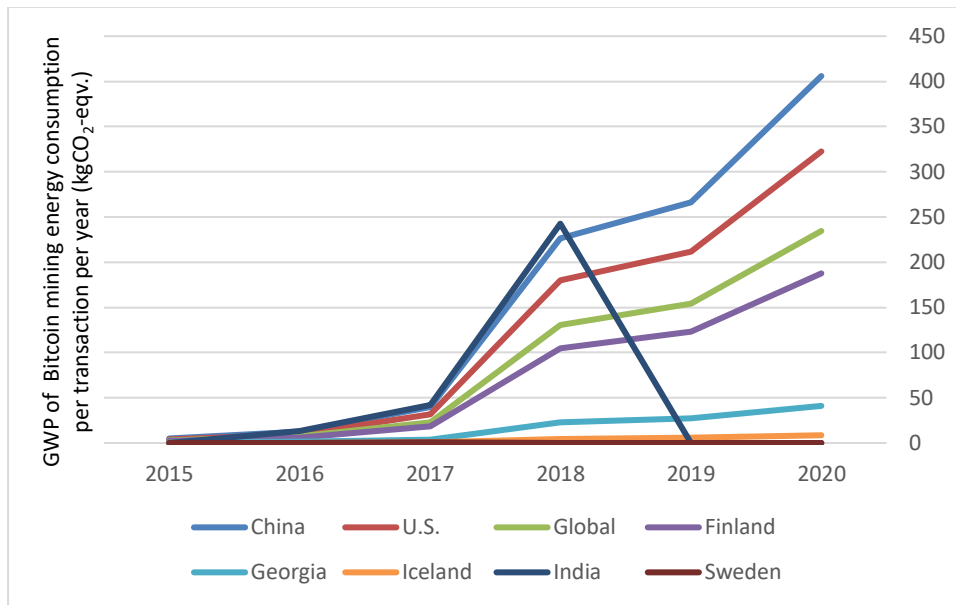

Figure 5: GWP of Bitcoin mining energy consumption per transaction by country by year (kgCO<sub>2</sub>-eqv.)

Table 22: Total annual GWP of Bitcoin mining energy consumption by country by country by year

| Countries             | Total GWP per year (MtCO <sub>2</sub> -eqv.) |         |         |          |          |          |
|-----------------------|----------------------------------------------|---------|---------|----------|----------|----------|
|                       | 2015                                         | 2016    | 2017    | 2018     | 2019     | 2020     |
| <b>China</b>          | 0.13561                                      | 0.64899 | 2.94105 | 12.97205 | 22.79232 | 34.69843 |
| <b>U.S.</b>           | 0.03512                                      | 0.12270 | 0.30717 | 1.37899  | 2.92891  | 5.84839  |
| <b>Unknown server</b> | 0.00880                                      | 0.05170 | 0.24183 | 1.85170  | 2.20334  | 1.88017  |
| <b>Finland</b>        | 0.00476                                      | 0.01526 | 0.03581 | 0.07724  | 0.26006  | 0.05769  |
| <b>Georgia</b>        | 0.00104                                      | 0.00334 | 0.00783 | 0.01690  | 0.05690  | 0.01262  |
| <b>Iceland</b>        | 0.00022                                      | 0.00070 | 0.00164 | 0.00353  | 0.01188  | 0.00263  |
| <b>India</b>          | 0.00000                                      | 0.01373 | 0.11098 | 0.05530  | 0.00000  | 0.00000  |
| <b>Sweden</b>         | 0.00000                                      | 0.00008 | 0.00017 | 0.00000  | 0.00000  | 0.00000  |
| <b>Total</b>          | 0.1855                                       | 0.8427  | 3.5353  | 16.3004  | 28.2534  | 42.4999  |



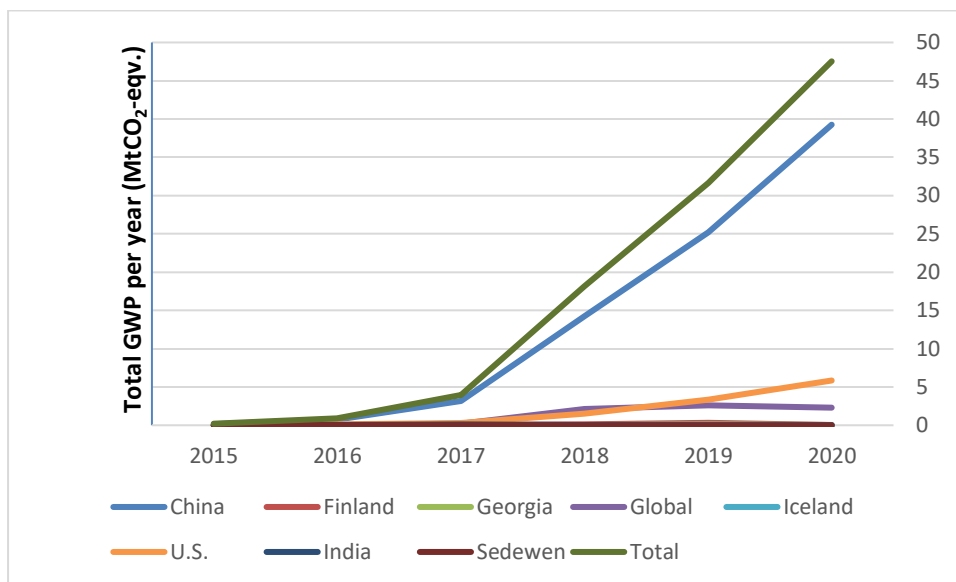

Figure 6: Total annual GWP of Bitcoin mining energy consumption by country by country by year (MtCO<sub>2</sub>-eqv.)

b) China

\*C: Country Code \*\* P.A.D: Percentage Annual Carbon emission distribution

*Table 23: Carbon Footprint Distribution of Bitcoin mining energy consumption in China per transaction by country*

| Order | Country Code | P.A.D.* (%) | GWP per transaction per year (kgCO <sub>2</sub> -eqv.) |            |            |           |           |          |
|-------|--------------|-------------|--------------------------------------------------------|------------|------------|-----------|-----------|----------|
|       |              |             | 2020                                                   | 2019       | 2018       | 2017      | 2016      | 2015     |
| 1     | CN           | 99.391%     | 403.456760                                             | 264.848098 | 224.693283 | 39.251060 | 12.243238 | 4.974400 |
| 2     | WA           | 0.093%      | 0.378787                                               | 0.248654   | 0.210954   | 0.036851  | 0.011495  | 0.004670 |
| 3     | US           | 0.092%      | 0.371707                                               | 0.244006   | 0.207011   | 0.036162  | 0.011280  | 0.004583 |
| 4     | RU           | 0.077%      | 0.314406                                               | 0.206391   | 0.175099   | 0.030588  | 0.009541  | 0.003876 |
| 5     | WM           | 0.042%      | 0.171322                                               | 0.112464   | 0.095413   | 0.016667  | 0.005199  | 0.002112 |
| 6     | JP           | 0.037%      | 0.149740                                               | 0.098297   | 0.083393   | 0.014568  | 0.004544  | 0.001846 |
| 7     | KR           | 0.037%      | 0.149300                                               | 0.098008   | 0.083148   | 0.014525  | 0.004531  | 0.001841 |
| 8     | ID           | 0.035%      | 0.141601                                               | 0.092954   | 0.078861   | 0.013776  | 0.004297  | 0.001746 |
| 9     | DE           | 0.031%      | 0.125893                                               | 0.082642   | 0.070113   | 0.012248  | 0.003820  | 0.001552 |
| 10    | WL           | 0.025%      | 0.101351                                               | 0.066532   | 0.056445   | 0.009860  | 0.003076  | 0.001250 |

*Table 24: Carbon Footprint Distribution of Bitcoin mining energy consumption in China per transaction by sector in Supply Chain*

| Order | Country Code | Sector                                                              | P.A.D.* (%) | GWP per transaction per year (kgCO <sub>2</sub> -eqv.) |            |            |           |           |          |
|-------|--------------|---------------------------------------------------------------------|-------------|--------------------------------------------------------|------------|------------|-----------|-----------|----------|
|       |              |                                                                     |             | 2020                                                   | 2019       | 2018       | 2017      | 2016      | 2015     |
| 1     | CN           | Electricity by coal                                                 | 95.260%     | 386.689357                                             | 253.841181 | 215.355175 | 37.619811 | 11.734417 | 4.767667 |
| 2     | CN           | Electricity by gas                                                  | 1.861%      | 7.552507                                               | 4.957823   | 4.206145   | 0.7347600 | 0.229187  | 0.093118 |
| 3     | CN           | Other Bituminous Coal                                               | 1.039%      | 4.218519                                               | 2.769235   | 2.349379   | 0.4104066 | 0.128015  | 0.052012 |
| 4     | CN           | Basic iron and steel and of ferro-alloys and first products thereof | 0.386%      | 1.567937                                               | 1.029268   | 0.873216   | 0.1525397 | 0.047580  | 0.019332 |

|    |    |                                                                                   |        |          |          |          |           |          |          |
|----|----|-----------------------------------------------------------------------------------|--------|----------|----------|----------|-----------|----------|----------|
| 5  | CN | Steam and hot water supply services                                               | 0.119% | 0.482845 | 0.316962 | 0.268906 | 0.0469745 | 0.014652 | 0.005953 |
| 6  | CN | Other non-metallic mineral products                                               | 0.058% | 0.236244 | 0.155082 | 0.131569 | 0.0229834 | 0.007169 | 0.002913 |
| 7  | CN | Rubber and plastic products (25)                                                  | 0.046% | 0.185159 | 0.121547 | 0.103119 | 0.018013  | 0.005619 | 0.002283 |
| 8  | CN | Coke Oven Coke                                                                    | 0.042% | 0.171680 | 0.112699 | 0.095612 | 0.016702  | 0.005210 | 0.002117 |
| 9  | CN | Air transport services (62)                                                       | 0.039% | 0.158272 | 0.103897 | 0.088145 | 0.015397  | 0.004803 | 0.001951 |
| 10 | WA | Natural gas and services related to natural gas extraction, excluding surveying   | 0.032% | 0.129924 | 0.085288 | 0.072357 | 0.0126399 | 0.003943 | 0.001602 |
| 11 | CN | Chemicals nec                                                                     | 0.030% | 0.122509 | 0.080421 | 0.068228 | 0.0119185 | 0.003718 | 0.001510 |
| 12 | CN | Supporting and auxiliary transport services; travel agency services (63)          | 0.029% | 0.118832 | 0.078007 | 0.066180 | 0.0115607 | 0.003606 | 0.001465 |
| 13 | US | Air transport services (62)                                                       | 0.028% | 0.114479 | 0.075149 | 0.063755 | 0.011137  | 0.003474 | 0.001411 |
| 14 | CN | Sea and coastal water transportation services                                     | 0.028% | 0.112173 | 0.073636 | 0.062471 | 0.010912  | 0.003404 | 0.001383 |
| 15 | CN | Other business services (74)                                                      | 0.027% | 0.109266 | 0.071727 | 0.060852 | 0.0106301 | 0.003316 | 0.001347 |
| 16 | CN | Electricity by hydro                                                              | 0.026% | 0.107285 | 0.070427 | 0.059749 | 0.010437  | 0.003256 | 0.001323 |
| 17 | CN | Crude petroleum and services related to crude oil extraction, excluding surveying | 0.025% | 0.101896 | 0.066889 | 0.056748 | 0.009913  | 0.003092 | 0.001256 |
| 18 | CN | Coking Coal                                                                       | 0.023% | 0.094611 | 0.062107 | 0.052691 | 0.009204  | 0.002871 | 0.001167 |
| 19 | RU | Other Bituminous Coal                                                             | 0.022% | 0.088975 | 0.058408 | 0.049552 | 0.008656  | 0.002700 | 0.001097 |
| 20 | CN | Inland water transportation services                                              | 0.022% | 0.088228 | 0.057917 | 0.049136 | 0.008583  | 0.002677 | 0.001088 |

*Table 25: Total Annual Carbon Footprint Distribution of Bitcoin mining energy consumption in China by country*

| Order | Country Code | P.A.D. * (%) | Total GWP per year (MtCO <sub>2</sub> -eqv.) |        |        |       |                        |                        |
|-------|--------------|--------------|----------------------------------------------|--------|--------|-------|------------------------|------------------------|
|       |              |              | 2020                                         | 2019   | 2018   | 2017  | 2016                   | 2015                   |
| 1     | CN           | 99.391%      | 34.487                                       | 22.653 | 12.893 | 2.923 | 6.450 10 <sup>-1</sup> | 1.348 10 <sup>-1</sup> |

|           |    |        |                        |                        |                        |                        |                        |                        |
|-----------|----|--------|------------------------|------------------------|------------------------|------------------------|------------------------|------------------------|
| <b>2</b>  | WA | 0.093% | 3.238 10 <sup>-2</sup> | 2.127 10 <sup>-2</sup> | 1.210 10 <sup>-2</sup> | 2.744 10 <sup>-3</sup> | 6.056 10 <sup>-4</sup> | 1.265 10 <sup>-4</sup> |
| <b>3</b>  | US | 0.092% | 3.177 10 <sup>-2</sup> | 2.087 10 <sup>-2</sup> | 1.188 10 <sup>-2</sup> | 2.693 10 <sup>-3</sup> | 5.943 10 <sup>-4</sup> | 1.242 10 <sup>-4</sup> |
| <b>4</b>  | RU | 0.077% | 2.688 10 <sup>-2</sup> | 1.765 10 <sup>-2</sup> | 1.005 10 <sup>-2</sup> | 2.278 10 <sup>-3</sup> | 5.027 10 <sup>-4</sup> | 1.050 10 <sup>-4</sup> |
| <b>5</b>  | WM | 0.042% | 1.464 10 <sup>-2</sup> | 9.619 10 <sup>-3</sup> | 5.475 10 <sup>-3</sup> | 1.241 10 <sup>-3</sup> | 2.739 10 <sup>-4</sup> | 5.723 10 <sup>-5</sup> |
| <b>6</b>  | JP | 0.037% | 1.280 10 <sup>-2</sup> | 8.408 10 <sup>-3</sup> | 4.785 10 <sup>-3</sup> | 1.085 10 <sup>-3</sup> | 2.394 10 <sup>-4</sup> | 5.002 10 <sup>-5</sup> |
| <b>7</b>  | KR | 0.037% | 1.276 10 <sup>-2</sup> | 8.383 10 <sup>-3</sup> | 4.771 10 <sup>-3</sup> | 1.082 10 <sup>-3</sup> | 2.387 10 <sup>-4</sup> | 4.988 10 <sup>-5</sup> |
| <b>8</b>  | ID | 0.035% | 1.210 10 <sup>-2</sup> | 7.951 10 <sup>-3</sup> | 4.525 10 <sup>-3</sup> | 1.026 10 <sup>-3</sup> | 2.264 10 <sup>-4</sup> | 4.730 10 <sup>-5</sup> |
| <b>9</b>  | DE | 0.031% | 1.076 10 <sup>-2</sup> | 7.069 10 <sup>-3</sup> | 4.023 10 <sup>-3</sup> | 9.121 10 <sup>-4</sup> | 2.013 10 <sup>-4</sup> | 4.206 10 <sup>-5</sup> |
| <b>10</b> | WL | 0.025% | 8.663 10 <sup>-3</sup> | 5.691 10 <sup>-3</sup> | 3.239 10 <sup>-3</sup> | 7.343 10 <sup>-4</sup> | 1.620 10 <sup>-4</sup> | 3.386 10 <sup>-5</sup> |

*Table 26: Total Annual Carbon Footprint Distribution of Bitcoin mining energy consumption in China by sector*

| Order    | Country Code | Sector                                                              | P.A.D.* (%) | Total GWP per year (MtCO <sub>2</sub> -eqv.) |                         |                         |                         |                         |                         |
|----------|--------------|---------------------------------------------------------------------|-------------|----------------------------------------------|-------------------------|-------------------------|-------------------------|-------------------------|-------------------------|
|          |              |                                                                     |             | 2020                                         | 2019                    | 2018                    | 2017                    | 2016                    | 2015                    |
| <b>1</b> | CN           | Electricity by coal                                                 | 95.260 %    | 33 .054                                      | 21 .712                 | 12 .357                 | 2 .802                  | 6 .182 10 <sup>-1</sup> | 1 .292 10 <sup>-1</sup> |
| <b>2</b> | CN           | Electricity by gas                                                  | 1.861%      | 6 .456 10 <sup>-1</sup>                      | 4 .241 10 <sup>-1</sup> | 2 .414 10 <sup>-1</sup> | 5 .472 10 <sup>-2</sup> | 1 .207 10 <sup>-2</sup> | 2 .523 10 <sup>-3</sup> |
| <b>3</b> | CN           | Other Bituminous Coal                                               | 1.039%      | 3 .606 10 <sup>-1</sup>                      | 2 .369 10 <sup>-1</sup> | 1 .348 10 <sup>-1</sup> | 3 .056 10 <sup>-2</sup> | 6 .744 10 <sup>-3</sup> | 1 .409 10 <sup>-3</sup> |
| <b>4</b> | CN           | Basic iron and steel and of ferro-alloys and first products thereof | 0.386%      | 1 .340 10 <sup>-1</sup>                      | 8 .804 10 <sup>-2</sup> | 5 .011 10 <sup>-2</sup> | 1 .136 10 <sup>-2</sup> | 2 .507 10 <sup>-3</sup> | 5 .238 10 <sup>-4</sup> |
| <b>5</b> | CN           | Steam and hot water supply services                                 | 0.119%      | 4 .127 10 <sup>-2</sup>                      | 2 .711 10 <sup>-2</sup> | 1 .543 10 <sup>-2</sup> | 3 .498 10 <sup>-3</sup> | 7 .720 10 <sup>-4</sup> | 1 .613 10 <sup>-4</sup> |
| <b>6</b> | CN           | Other non-metallic mineral products                                 | 0.058%      | 2 .019 10 <sup>-2</sup>                      | 1 .326 10 <sup>-2</sup> | 7 .550 10 <sup>-3</sup> | 1 .712 10 <sup>-3</sup> | 3 .777 10 <sup>-4</sup> | 7 .892 10 <sup>-5</sup> |
| <b>7</b> | CN           | Rubber and plastic products (25)                                    | 0.046%      | 1 .583 10 <sup>-2</sup>                      | 1 .040 10 <sup>-2</sup> | 5 .917 10 <sup>-3</sup> | 1 .342 10 <sup>-3</sup> | 2 .960 10 <sup>-4</sup> | 6 .186 10 <sup>-5</sup> |
| <b>8</b> | CN           | Coke Oven Coke                                                      | 0.042%      | 1 .468 10 <sup>-2</sup>                      | 9 .640 10 <sup>-3</sup> | 5 .486 10 <sup>-3</sup> | 1 .244 10 <sup>-3</sup> | 2 .745 10 <sup>-4</sup> | 5 .735 10 <sup>-5</sup> |

|           |    |                                                                                   |        |                         |                         |                         |                         |                         |                         |
|-----------|----|-----------------------------------------------------------------------------------|--------|-------------------------|-------------------------|-------------------------|-------------------------|-------------------------|-------------------------|
| <b>9</b>  | CN | Air transport services (62)                                                       | 0.039% | 1 .353 10 <sup>-2</sup> | 8 .887 10 <sup>-3</sup> | 5 .058 10 <sup>-3</sup> | 1 .147 10 <sup>-3</sup> | 2 .530 10 <sup>-4</sup> | 5 .287 10 <sup>-5</sup> |
| <b>10</b> | WA | Natural gas and services related to natural gas extraction, excluding surveying   | 0.032% | 1 .111 10 <sup>-2</sup> | 7 .295 10 <sup>-3</sup> | 4 .152 10 <sup>-3</sup> | 9 .413 10 <sup>-4</sup> | 2 .077 10 <sup>-4</sup> | 4 .340 10 <sup>-5</sup> |
| <b>11</b> | CN | Chemicals nec                                                                     | 0.030% | 1 .047 10 <sup>-2</sup> | 6 .879 10 <sup>-3</sup> | 3 .915 10 <sup>-3</sup> | 8 .876 10 <sup>-4</sup> | 1 .959 10 <sup>-4</sup> | 4 .093 10 <sup>-5</sup> |
| <b>12</b> | CN | Supporting and auxiliary transport services; travel agency services (63)          | 0.029% | 1 .016 10 <sup>-2</sup> | 6 .672 10 <sup>-3</sup> | 3 .797 10 <sup>-3</sup> | 8 .610 10 <sup>-4</sup> | 1 .900 10 <sup>-4</sup> | 3 .970 10 <sup>-5</sup> |
| <b>13</b> | US | Air transport services (62)                                                       | 0.028% | 9 .786 10 <sup>-3</sup> | 6 .428 10 <sup>-3</sup> | 3 .658 10 <sup>-3</sup> | 8 .294 10 <sup>-4</sup> | 1 .830 10 <sup>-4</sup> | 3 .824 10 <sup>-5</sup> |
| <b>14</b> | CN | Sea and coastal water transportation services                                     | 0.028% | 9 .588 10 <sup>-3</sup> | 6 .298 10 <sup>-3</sup> | 3 .585 10 <sup>-3</sup> | 8 .127 10 <sup>-4</sup> | 1 .793 10 <sup>-4</sup> | 3 .747 10 <sup>-5</sup> |
| <b>15</b> | CN | Other business services (74)                                                      | 0.027% | 9 .340 10 <sup>-3</sup> | 6 .135 10 <sup>-3</sup> | 3 .492 10 <sup>-3</sup> | 7 .917 10 <sup>-4</sup> | 1 .747 10 <sup>-4</sup> | 3 .650 10 <sup>-5</sup> |
| <b>16</b> | CN | Electricity by hydro                                                              | 0.026% | 9 .171 10 <sup>-3</sup> | 6 .024 10 <sup>-3</sup> | 3 .428 10 <sup>-3</sup> | 7 .773 10 <sup>-4</sup> | 1 .715 10 <sup>-4</sup> | 3 .584 10 <sup>-5</sup> |
| <b>17</b> | CN | Crude petroleum and services related to crude oil extraction, excluding surveying | 0.025% | 8 .710 10 <sup>-3</sup> | 5 .721 10 <sup>-3</sup> | 3 .256 10 <sup>-3</sup> | 7 .383 10 <sup>-4</sup> | 1 .629 10 <sup>-4</sup> | 3 .404 10 <sup>-5</sup> |
| <b>18</b> | CN | Coking Coal                                                                       | 0.023% | 8 .087 10 <sup>-3</sup> | 5 .312 10 <sup>-3</sup> | 3 .023 10 <sup>-3</sup> | 6 .855 10 <sup>-4</sup> | 1 .513 10 <sup>-4</sup> | 3 .161 10 <sup>-5</sup> |
| <b>19</b> | RU | Other Bituminous Coal                                                             | 0.022% | 7 .606 10 <sup>-3</sup> | 4 .996 10 <sup>-3</sup> | 2 .843 10 <sup>-3</sup> | 6 .446 10 <sup>-4</sup> | 1 .423 10 <sup>-4</sup> | 2 .972 10 <sup>-5</sup> |
| <b>20</b> | CN | Inland water transportation services                                              | 0.022% | 7 .542 10 <sup>-3</sup> | 4 .954 10 <sup>-3</sup> | 2 .819 10 <sup>-3</sup> | 6 .392 10 <sup>-4</sup> | 1 .411 10 <sup>-4</sup> | 2 .947 10 <sup>-5</sup> |

c) Finland

*Table 27: Carbon Footprint Distribution of Bitcoin mining energy consumption in Finland per transaction by country*

| Order | Country Code | P.A.D.* (%) | GWP per transaction per year (kgCO2-eqv.) |           |           |          |          |          |
|-------|--------------|-------------|-------------------------------------------|-----------|-----------|----------|----------|----------|
|       |              |             | 2020                                      | 2019      | 2018      | 2017     | 2016     | 2015     |
| 1     | FI           | 51.471%     | 96.559885                                 | 63.386475 | 53.776166 | 9.394012 | 2.930192 | 1.190530 |
| 2     | RU           | 45.311%     | 85.003120                                 | 55.800068 | 47.339968 | 8.269691 | 2.579492 | 1.048042 |
| 3     | SE           | 0.593%      | 1.112213                                  | 0.730109  | 0.619414  | 0.108204 | 0.033751 | 0.013713 |
| 4     | WA           | 0.330%      | 0.619010                                  | 0.406347  | 0.344739  | 0.060222 | 0.018784 | 0.007632 |
| 5     | WM           | 0.266%      | 0.499096                                  | 0.327630  | 0.277957  | 0.048555 | 0.015145 | 0.006154 |
| 6     | CN           | 0.254%      | 0.476906                                  | 0.313064  | 0.265599  | 0.046397 | 0.014472 | 0.005880 |
| 7     | DE           | 0.192%      | 0.359942                                  | 0.236283  | 0.200459  | 0.035018 | 0.010923 | 0.004438 |
| 8     | US           | 0.185%      | 0.346721                                  | 0.227604  | 0.193096  | 0.033731 | 0.010522 | 0.004275 |
| 9     | IN           | 0.135%      | 0.253339                                  | 0.166304  | 0.141090  | 0.024647 | 0.007688 | 0.003124 |
| 10    | PL           | 0.110%      | 0.207134                                  | 0.135972  | 0.115357  | 0.020151 | 0.006286 | 0.002554 |

*Table 28: Carbon Footprint Distribution of Bitcoin mining energy consumption in Finland per transaction by sector in Supply Chain*

| Order | Country Code | Sector              | P.A.D.* (%) | GWP per transaction per year (kgCO2-eqv.) |           |           |           |          |          |
|-------|--------------|---------------------|-------------|-------------------------------------------|-----------|-----------|-----------|----------|----------|
|       |              |                     |             | 2020                                      | 2019      | 2018      | 2017      | 2016     | 2015     |
| 1     | FI           | Electricity by coal | 41.402%     | 77.669877                                 | 50.986180 | 43.255936 | 7.5562620 | 2.356958 | 0.957627 |

|           |    |                                                                                              |         |           |           |           |           |          |          |
|-----------|----|----------------------------------------------------------------------------------------------|---------|-----------|-----------|-----------|-----------|----------|----------|
| <b>2</b>  | RU | Natural gas and services related to natural gas extraction. excluding surveying              | 39.494% | 74.091745 | 48.637325 | 41.263201 | 7.2081566 | 2.248377 | 0.913511 |
| <b>3</b>  | RU | Other Bituminous Coal                                                                        | 3.825%  | 7.176369  | 4.710908  | 3.996666  | 0.698166  | 0.217773 | 0.088481 |
| <b>4</b>  | FI | Electricity by biomass and waste                                                             | 3.003%  | 5.633945  | 3.698388  | 3.137659  | 0.5481090 | 0.170967 | 0.069463 |
| <b>5</b>  | FI | Natural Gas Liquids                                                                          | 1.419%  | 2.661855  | 1.747368  | 1.482442  | 0.2589636 | 0.080776 | 0.032819 |
| <b>6</b>  | FI | Electricity by nuclear                                                                       | 1.183%  | 2.218764  | 1.456501  | 1.235675  | 0.2158566 | 0.067330 | 0.027356 |
| <b>7</b>  | FI | Electricity by gas                                                                           | 0.848%  | 1.591157  | 1.044511  | 0.886148  | 0.1547987 | 0.048285 | 0.019618 |
| <b>8</b>  | FI | Electricity by hydro                                                                         | 0.821%  | 1.539449  | 1.010567  | 0.857350  | 0.1497682 | 0.046716 | 0.018981 |
| <b>9</b>  | RU | Heavy Fuel Oil                                                                               | 0.383%  | 0.717964  | 0.471305  | 0.399849  | 0.0698484 | 0.021787 | 0.008852 |
| <b>10</b> | RU | Steam and hot water supply services                                                          | 0.370%  | 0.693650  | 0.455345  | 0.386308  | 0.0674830 | 0.021049 | 0.008552 |
| <b>11</b> | FI | Electricity by petroleum and other oil derivatives                                           | 0.355%  | 0.666181  | 0.437313  | 0.371010  | 0.0648107 | 0.020216 | 0.008214 |
| <b>12</b> | RU | Transportation services via pipelines                                                        | 0.332%  | 0.622810  | 0.408842  | 0.346856  | 0.0605912 | 0.018900 | 0.007679 |
| <b>13</b> | FI | Steam and hot water supply services                                                          | 0.315%  | 0.591575  | 0.388338  | 0.329460  | 0.0575524 | 0.017952 | 0.007294 |
| <b>14</b> | FI | Distribution services of gaseous fuels through mains                                         | 0.263%  | 0.494062  | 0.324326  | 0.275153  | 0.0480657 | 0.014993 | 0.006092 |
| <b>15</b> | FI | Wholesale trade and commission trade services. except of motor vehicles and motorcycles (51) | 0.233%  | 0.437961  | 0.287498  | 0.243910  | 0.0426078 | 0.013290 | 0.005400 |
| <b>16</b> | FI | Electricity by wind                                                                          | 0.139%  | 0.260495  | 0.171001  | 0.145075  | 0.0253427 | 0.007905 | 0.003212 |
| <b>17</b> | RU | Crude petroleum and services related to crude oil extraction. excluding surveying            | 0.134%  | 0.251462  | 0.165071  | 0.140044  | 0.0244639 | 0.007631 | 0.003100 |
| <b>18</b> | FI | Air transport services (62)                                                                  | 0.132%  | 0.246906  | 0.162081  | 0.137507  | 0.0240207 | 0.007493 | 0.003044 |
| <b>19</b> | FI | Motor Gasoline                                                                               | 0.129%  | 0.242020  | 0.158873  | 0.134786  | 0.0235453 | 0.007344 | 0.002984 |
| <b>20</b> | SE | Electricity by hydro                                                                         | 0.124%  | 0.232214  | 0.152436  | 0.129325  | 0.0225913 | 0.007047 | 0.002863 |

Table 29: Total Annual Carbon Footprint Distribution of Bitcoin mining energy consumption in Finland by country

| Order | Country Code | P.A.D.* (%) | Total GWP per year (MtCO <sub>2</sub> -eqv.) |                        |                        |                        |                        |                        |
|-------|--------------|-------------|----------------------------------------------|------------------------|------------------------|------------------------|------------------------|------------------------|
|       |              |             | 2020                                         | 2019                   | 2018                   | 2017                   | 2016                   | 2015                   |
| 1     | FI           | 51.471%     | 2.969 10 <sup>-2</sup>                       | 1.339 10 <sup>-1</sup> | 3.976 10 <sup>-2</sup> | 1.843 10 <sup>-2</sup> | 7.856 10 <sup>-3</sup> | 2.450 10 <sup>-3</sup> |
| 2     | RU           | 45.311%     | 2.614 10 <sup>-2</sup>                       | 1.178 10 <sup>-1</sup> | 3.500 10 <sup>-2</sup> | 1.622 10 <sup>-2</sup> | 6.916 10 <sup>-3</sup> | 2.157 10 <sup>-3</sup> |
| 3     | SE           | 0.593%      | 3.420 10 <sup>-4</sup>                       | 1.542 10 <sup>-3</sup> | 4.579 10 <sup>-4</sup> | 2.123 10 <sup>-4</sup> | 9.049 10 <sup>-5</sup> | 2.822 10 <sup>-5</sup> |
| 4     | WA           | 0.330%      | 1.904 10 <sup>-4</sup>                       | 8.581 10 <sup>-4</sup> | 2.549 10 <sup>-4</sup> | 1.182 10 <sup>-4</sup> | 5.036 10 <sup>-5</sup> | 1.571 10 <sup>-5</sup> |
| 5     | WM           | 0.266%      | 1.535 10 <sup>-4</sup>                       | 6.919 10 <sup>-4</sup> | 2.055 10 <sup>-4</sup> | 9.526 10 <sup>-5</sup> | 4.061 10 <sup>-5</sup> | 1.267 10 <sup>-5</sup> |
| 6     | CN           | 0.254%      | 1.467 10 <sup>-4</sup>                       | 6.611 10 <sup>-4</sup> | 1.964 10 <sup>-4</sup> | 9.103 10 <sup>-5</sup> | 3.880 10 <sup>-5</sup> | 1.210 10 <sup>-5</sup> |
| 7     | DE           | 0.192%      | 1.107 10 <sup>-4</sup>                       | 4.990 10 <sup>-4</sup> | 1.482 10 <sup>-4</sup> | 6.870 10 <sup>-5</sup> | 2.929 10 <sup>-5</sup> | 9.134 10 <sup>-6</sup> |
| 8     | US           | 0.185%      | 1.066 10 <sup>-4</sup>                       | 4.806 10 <sup>-4</sup> | 1.428 10 <sup>-4</sup> | 6.618 10 <sup>-5</sup> | 2.821 10 <sup>-5</sup> | 8.799 10 <sup>-6</sup> |
| 9     | IN           | 0.135%      | 7.790 10 <sup>-5</sup>                       | 3.512 10 <sup>-4</sup> | 1.043 10 <sup>-4</sup> | 4.836 10 <sup>-5</sup> | 2.061 10 <sup>-5</sup> | 6.429 10 <sup>-6</sup> |
| 10    | PL           | 0.110%      | 6.370 10 <sup>-5</sup>                       | 2.871 10 <sup>-4</sup> | 8.528 10 <sup>-5</sup> | 3.954 10 <sup>-5</sup> | 1.685 10 <sup>-5</sup> | 5.256 10 <sup>-6</sup> |

Table 30: Total Annual Carbon Footprint Distribution of Bitcoin mining energy consumption in Finland by sector

| Order | Country Code | Sector | P.A.D.* (%) | Total GWP per year (MtCO <sub>2</sub> -eqv.) |      |      |      |      |      |
|-------|--------------|--------|-------------|----------------------------------------------|------|------|------|------|------|
|       |              |        |             | 2020                                         | 2019 | 2018 | 2017 | 2016 | 2015 |



|    |    |                                                                                              |         |                        |                        |                        |                        |                        |                        |
|----|----|----------------------------------------------------------------------------------------------|---------|------------------------|------------------------|------------------------|------------------------|------------------------|------------------------|
| 1  | FI | Electricity by coal                                                                          | 41.402% | 2.388 10 <sup>-2</sup> | 1.077 10 <sup>-1</sup> | 3.198 10 <sup>-2</sup> | 1.482 10 <sup>-2</sup> | 6.319 10 <sup>-3</sup> | 1.971 10 <sup>-3</sup> |
| 2  | RU | Natural gas and services related to natural gas extraction, excluding surveying              | 39.494% | 2.278 10 <sup>-2</sup> | 1.027 10 <sup>-1</sup> | 3.051 10 <sup>-2</sup> | 1.414 10 <sup>-2</sup> | 6.028 10 <sup>-3</sup> | 1.880 10 <sup>-3</sup> |
| 3  | RU | Other Bituminous Coal                                                                        | 3.825%  | 2.207 10 <sup>-3</sup> | 9.948 10 <sup>-3</sup> | 2.955 10 <sup>-3</sup> | 1.370 10 <sup>-3</sup> | 5.839 10 <sup>-4</sup> | 1.821 10 <sup>-4</sup> |
| 4  | FI | Electricity by biomass and waste                                                             | 3.003%  | 1.733 10 <sup>-3</sup> | 7.810 10 <sup>-3</sup> | 2.320 10 <sup>-3</sup> | 1.075 10 <sup>-3</sup> | 4.584 10 <sup>-4</sup> | 1.430 10 <sup>-4</sup> |
| 5  | FI | Natural Gas Liquids                                                                          | 1.419%  | 8.186 10 <sup>-4</sup> | 3.690 10 <sup>-3</sup> | 1.096 10 <sup>-3</sup> | 5.081 10 <sup>-4</sup> | 2.166 10 <sup>-4</sup> | 6.755 10 <sup>-5</sup> |
| 6  | FI | Electricity by nuclear                                                                       | 1.183%  | 6.823 10 <sup>-4</sup> | 3.076 10 <sup>-3</sup> | 9.135 10 <sup>-4</sup> | 4.235 10 <sup>-4</sup> | 1.805 10 <sup>-4</sup> | 5.631 10 <sup>-5</sup> |
| 7  | FI | Electricity by gas                                                                           | 0.848%  | 4.893 10 <sup>-4</sup> | 2.206 10 <sup>-3</sup> | 6.551 10 <sup>-4</sup> | 3.037 10 <sup>-4</sup> | 1.295 10 <sup>-4</sup> | 4.038 10 <sup>-5</sup> |
| 8  | FI | Electricity by hydro                                                                         | 0.821%  | 4.734 10 <sup>-4</sup> | 2.134 10 <sup>-3</sup> | 6.338 10 <sup>-4</sup> | 2.938 10 <sup>-4</sup> | 1.253 10 <sup>-4</sup> | 3.907 10 <sup>-5</sup> |
| 9  | RU | Heavy Fuel Oil                                                                               | 0.383%  | 2.208 10 <sup>-4</sup> | 9.953 10 <sup>-4</sup> | 2.956 10 <sup>-4</sup> | 1.370 10 <sup>-4</sup> | 5.841 10 <sup>-5</sup> | 1.822 10 <sup>-5</sup> |
| 10 | RU | Steam and hot water supply services                                                          | 0.370%  | 2.133 10 <sup>-4</sup> | 9.616 10 <sup>-4</sup> | 2.856 10 <sup>-4</sup> | 1.324 10 <sup>-4</sup> | 5.644 10 <sup>-5</sup> | 1.760 10 <sup>-5</sup> |
| 11 | FI | Electricity by petroleum and other oil derivatives                                           | 0.355%  | 2.049 10 <sup>-4</sup> | 9.235 10 <sup>-4</sup> | 2.743 10 <sup>-4</sup> | 1.272 10 <sup>-4</sup> | 5.420 10 <sup>-5</sup> | 1.691 10 <sup>-5</sup> |
| 12 | RU | Transportation services via pipelines                                                        | 0.332%  | 1.915 10 <sup>-4</sup> | 8.634 10 <sup>-4</sup> | 2.564 10 <sup>-4</sup> | 1.189 10 <sup>-4</sup> | 5.067 10 <sup>-5</sup> | 1.581 10 <sup>-5</sup> |
| 13 | FI | Steam and hot water supply services                                                          | 0.315%  | 1.819 10 <sup>-4</sup> | 8.201 10 <sup>-4</sup> | 2.436 10 <sup>-4</sup> | 1.129 10 <sup>-4</sup> | 4.813 10 <sup>-5</sup> | 1.501 10 <sup>-5</sup> |
| 14 | FI | Distribution services of gaseous fuels through mains                                         | 0.263%  | 1.519 10 <sup>-4</sup> | 6.849 10 <sup>-4</sup> | 2.034 10 <sup>-4</sup> | 9.430 10 <sup>-5</sup> | 4.020 10 <sup>-5</sup> | 1.254 10 <sup>-5</sup> |
| 15 | FI | Wholesale trade and commission trade services, except of motor vehicles and motorcycles (51) | 0.233%  | 1.347 10 <sup>-4</sup> | 6.071 10 <sup>-4</sup> | 1.803 10 <sup>-4</sup> | 8.359 10 <sup>-5</sup> | 3.563 10 <sup>-5</sup> | 1.111 10 <sup>-5</sup> |
| 16 | FI | Electricity by wind                                                                          | 0.139%  | 8.011 10 <sup>-5</sup> | 3.611 10 <sup>-4</sup> | 1.073 10 <sup>-4</sup> | 4.972 10 <sup>-5</sup> | 2.119 10 <sup>-5</sup> | 6.611 10 <sup>-6</sup> |
| 17 | RU | Crude petroleum and services related to crude oil extraction, excluding surveying            | 0.134%  | 7.733 10 <sup>-5</sup> | 3.486 10 <sup>-4</sup> | 1.035 10 <sup>-4</sup> | 4.800 10 <sup>-5</sup> | 2.046 10 <sup>-5</sup> | 6.381 10 <sup>-6</sup> |

|           |    |                             |        |                        |                        |                        |                        |                        |                        |
|-----------|----|-----------------------------|--------|------------------------|------------------------|------------------------|------------------------|------------------------|------------------------|
| <b>18</b> | FI | Air transport services (62) | 0.132% | 7.593 10 <sup>-5</sup> | 3.423 10 <sup>-4</sup> | 1.017 10 <sup>-4</sup> | 4.713 10 <sup>-5</sup> | 2.009 10 <sup>-5</sup> | 6.266 10 <sup>-6</sup> |
| <b>19</b> | FI | Motor Gasoline              | 0.129% | 7.442 10 <sup>-5</sup> | 3.355 10 <sup>-4</sup> | 9.964 10 <sup>-5</sup> | 4.619 10 <sup>-5</sup> | 1.969 10 <sup>-5</sup> | 6.142 10 <sup>-6</sup> |
| <b>20</b> | SE | Electricity by hydro        | 0.124% | 7.141 10 <sup>-5</sup> | 3.219 10 <sup>-4</sup> | 9.561 10 <sup>-5</sup> | 4.432 10 <sup>-5</sup> | 1.889 10 <sup>-5</sup> | 5.893 10 <sup>-6</sup> |

d) Georgia

*Carbon Footprint Distribution of Bitcoin mining energy consumption in Georgia per transaction by country*

| Order     | Country Code | P.A.D.* (%) | GWP per transaction per year (kgCO2-equiv.) |           |           |          |          |          |
|-----------|--------------|-------------|---------------------------------------------|-----------|-----------|----------|----------|----------|
|           |              |             | 2020                                        | 2019      | 2018      | 2017     | 2016     | 2015     |
| <b>1</b>  | WE           | 96.061%     | 39.430061                                   | 25.883757 | 21.959404 | 3.836029 | 1.196539 | 0.000058 |
| <b>2</b>  | RU           | 1.110%      | 0.455531                                    | 0.299032  | 0.253695  | 0.044317 | 0.013823 | 0.000162 |
| <b>3</b>  | CN           | 0.484%      | 0.198660                                    | 0.130410  | 0.110638  | 0.019327 | 0.006029 | 0.000203 |
| <b>4</b>  | WM           | 0.316%      | 0.129813                                    | 0.085215  | 0.072295  | 0.012629 | 0.003939 | 0.000008 |
| <b>5</b>  | WA           | 0.316%      | 0.129551                                    | 0.085044  | 0.072150  | 0.012604 | 0.003931 | 0.000123 |
| <b>6</b>  | US           | 0.250%      | 0.102471                                    | 0.067267  | 0.057068  | 0.009969 | 0.003110 | 0.000633 |
| <b>7</b>  | DE           | 0.127%      | 0.052076                                    | 0.034185  | 0.029002  | 0.005066 | 0.001580 | 0.000075 |
| <b>8</b>  | IT           | 0.095%      | 0.038936                                    | 0.025559  | 0.021684  | 0.003788 | 0.001182 | 0.000042 |
| <b>9</b>  | IN           | 0.094%      | 0.038500                                    | 0.025273  | 0.021442  | 0.003746 | 0.001168 | 0.000394 |
| <b>10</b> | ES           | 0.079%      | 0.032314                                    | 0.021213  | 0.017997  | 0.003144 | 0.000981 | 0.000068 |

Table 31: Carbon Footprint Distribution of Bitcoin mining energy consumption in Georgia per transaction by sector in Supply Chain

| Order | Country Code | Sector                                                                                                                | P.A.D.* (%) | Total GWP per year (MtCO <sub>2</sub> -eqv.) |           |           |           |          |            |
|-------|--------------|-----------------------------------------------------------------------------------------------------------------------|-------------|----------------------------------------------|-----------|-----------|-----------|----------|------------|
|       |              |                                                                                                                       |             | 2020                                         | 2019      | 2018      | 2017      | 2016     | 2015       |
| 1     | WE           | Electricity by gas                                                                                                    | 78.292%     | 32.136439                                    | 21.095878 | 17.897437 | 3.1264547 | 0.975208 | 0.39622464 |
| 2     | WE           | Distribution services of gaseous fuels through mains                                                                  | 4.973%      | 2.041423                                     | 1.340086  | 1.136910  | 0.1986036 | 0.061949 | 0.02516962 |
| 3     | WE           | Electricity by coal                                                                                                   | 3.926%      | 1.611373                                     | 1.057782  | 0.897407  | 0.1567655 | 0.048898 | 0.01986735 |
| 4     | WE           | Steam and hot water supply services                                                                                   | 3.283%      | 1.347747                                     | 0.884725  | 0.750588  | 0.1311181 | 0.040899 | 0.01661698 |
| 5     | WE           | Electricity by hydro                                                                                                  | 2.047%      | 0.840123                                     | 0.551496  | 0.467881  | 0.0817329 | 0.025494 | 0.01035825 |
| 6     | WE           | Construction work (45)                                                                                                | 0.587%      | 0.240873                                     | 0.158121  | 0.134147  | 0.0234338 | 0.007310 | 0.00296984 |
| 7     | WE           | Wholesale trade and commission trade services, except of motor vehicles and motorcycles (51)                          | 0.277%      | 0.113725                                     | 0.074655  | 0.063336  | 0.0110639 | 0.003451 | 0.00140217 |
| 8     | WE           | Retail trade services, except of motor vehicles and motorcycles; repair services of personal and household goods (52) | 0.227%      | 0.093323                                     | 0.061262  | 0.051974  | 0.0090791 | 0.002832 | 0.00115063 |
| 9     | RU           | Heavy Fuel Oil                                                                                                        | 0.218%      | 0.089420                                     | 0.058700  | 0.049800  | 0.0086994 | 0.002714 | 0.0011025  |
| 10    | CN           | Electricity by coal                                                                                                   | 0.216%      | 0.088545                                     | 0.058125  | 0.049313  | 0.0086142 | 0.002687 | 0.00109171 |
| 11    | RU           | Steam and hot water supply services                                                                                   | 0.204%      | 0.083777                                     | 0.054995  | 0.046657  | 0.0081503 | 0.002542 | 0.00103292 |
| 12    | WE           | Cement, lime and plaster                                                                                              | 0.204%      | 0.083622                                     | 0.054893  | 0.046571  | 0.008135  | 0.002538 | 0.00103101 |
| 13    | WE           | Poultry                                                                                                               | 0.135%      | 0.055252                                     | 0.036270  | 0.030771  | 0.0053752 | 0.001677 | 0.00068122 |
| 14    | WE           | Other business services (74)                                                                                          | 0.132%      | 0.054104                                     | 0.035516  | 0.030132  | 0.0052636 | 0.001642 | 0.00066707 |
| 15    | WE           | Blast Furnace Gas                                                                                                     | 0.129%      | 0.053125                                     | 0.034874  | 0.029587  | 0.0051684 | 0.001612 | 0.00065501 |
| 16    | WE           | Coke oven gas                                                                                                         | 0.124%      | 0.050871                                     | 0.033394  | 0.028331  | 0.004949  | 0.001544 | 0.00062722 |

|           |    |                                                                     |        |          |          |          |           |          |            |
|-----------|----|---------------------------------------------------------------------|--------|----------|----------|----------|-----------|----------|------------|
| <b>17</b> | RU | Transportation services via pipelines                               | 0.115% | 0.047102 | 0.030920 | 0.026232 | 0.0045824 | 0.001429 | 0.00058074 |
| <b>18</b> | RU | Gas/Diesel Oil                                                      | 0.095% | 0.039151 | 0.025701 | 0.021804 | 0.0038088 | 0.001188 | 0.00048271 |
| <b>19</b> | WE | Natural Gas Liquids                                                 | 0.086% | 0.035260 | 0.023146 | 0.019637 | 0.0034303 | 0.001070 | 0.00043474 |
| <b>20</b> | RU | Basic iron and steel and of ferro-alloys and first products thereof | 0.084% | 0.034500 | 0.022648 | 0.019214 | 0.0033564 | 0.001047 | 0.00042537 |

*Table 32: Total Annual Carbon Footprint Distribution of Bitcoin mining energy consumption in Georgia by country*

| Order     | Country Code | P.A.D.* (%) | Total GWP per year (MtCO <sub>2</sub> -eqv.) |                        |                        |                        |                        |                        |
|-----------|--------------|-------------|----------------------------------------------|------------------------|------------------------|------------------------|------------------------|------------------------|
|           |              |             | 2020                                         | 2019                   | 2018                   | 2017                   | 2016                   | 2015                   |
| <b>1</b>  | WE           | 96.061%     | 1.213 10 <sup>-2</sup>                       | 5.466 10 <sup>-2</sup> | 1.623 10 <sup>-2</sup> | 7.526 10 <sup>-3</sup> | 3.208 10 <sup>-3</sup> | 1.001 10 <sup>-3</sup> |
| <b>2</b>  | RU           | 1.110%      | 1.401 10 <sup>-4</sup>                       | 6.315 10 <sup>-4</sup> | 1.876 10 <sup>-4</sup> | 8.695 10 <sup>-5</sup> | 3.706 10 <sup>-5</sup> | 1.156 10 <sup>-5</sup> |
| <b>3</b>  | CN           | 0.484%      | 6.109 10 <sup>-5</sup>                       | 2.754 10 <sup>-4</sup> | 8.179 10 <sup>-5</sup> | 3.792 10 <sup>-5</sup> | 1.616 10 <sup>-5</sup> | 5.041 10 <sup>-6</sup> |
| <b>4</b>  | WM           | 0.316%      | 3.992 10 <sup>-5</sup>                       | 1.800 10 <sup>-4</sup> | 5.345 10 <sup>-5</sup> | 2.478 10 <sup>-5</sup> | 1.056 10 <sup>-5</sup> | 3.294 10 <sup>-6</sup> |
| <b>5</b>  | WA           | 0.316%      | 3.984 10 <sup>-5</sup>                       | 1.796 10 <sup>-4</sup> | 5.334 10 <sup>-5</sup> | 2.473 10 <sup>-5</sup> | 1.054 10 <sup>-5</sup> | 3.288 10 <sup>-6</sup> |
| <b>6</b>  | US           | 0.250%      | 3.151 10 <sup>-5</sup>                       | 1.421 10 <sup>-4</sup> | 4.219 10 <sup>-5</sup> | 1.956 10 <sup>-5</sup> | 8.337 10 <sup>-6</sup> | 2.600 10 <sup>-6</sup> |
| <b>7</b>  | DE           | 0.127%      | 1.601 10 <sup>-5</sup>                       | 7.219 10 <sup>-5</sup> | 2.144 10 <sup>-5</sup> | 9.940 10 <sup>-6</sup> | 4.237 10 <sup>-6</sup> | 1.322 10 <sup>-6</sup> |
| <b>8</b>  | IT           | 0.095%      | 1.197 10 <sup>-5</sup>                       | 5.398 10 <sup>-5</sup> | 1.603 10 <sup>-5</sup> | 7.432 10 <sup>-6</sup> | 3.168 10 <sup>-6</sup> | 9.881 10 <sup>-7</sup> |
| <b>9</b>  | IN           | 0.094%      | 1.184 10 <sup>-5</sup>                       | 5.337 10 <sup>-5</sup> | 1.585 10 <sup>-5</sup> | 7.349 10 <sup>-6</sup> | 3.132 10 <sup>-6</sup> | 9.770 10 <sup>-7</sup> |
| <b>10</b> | ES           | 0.079%      | 9.937 10 <sup>-6</sup>                       | 4.480 10 <sup>-5</sup> | 1.330 10 <sup>-5</sup> | 6.168 10 <sup>-6</sup> | 2.629 10 <sup>-6</sup> | 8.200 10 <sup>-7</sup> |

Table 33: Total Annual Carbon Footprint Distribution of Bitcoin mining energy consumption in Georgia by sector

| Order | Country Code | Sector                                                                                                                | P.A.D.* (%) | Total GWP per year (MtCO <sub>2</sub> -eqv.) |                        |                        |                        |                        |                        |
|-------|--------------|-----------------------------------------------------------------------------------------------------------------------|-------------|----------------------------------------------|------------------------|------------------------|------------------------|------------------------|------------------------|
|       |              |                                                                                                                       |             | 2020                                         | 2019                   | 2018                   | 2017                   | 2016                   | 2015                   |
| 1     | WE           | Electricity by gas                                                                                                    | 78.292%     | 9.882 10 <sup>-3</sup>                       | 4.455 10 <sup>-2</sup> | 1.323 10 <sup>-2</sup> | 6.134 10 <sup>-3</sup> | 2.615 10 <sup>-3</sup> | 8.155 10 <sup>-4</sup> |
| 2     | WE           | Distribution services of gaseous fuels through mains                                                                  | 4.973%      | 6.278 10 <sup>-4</sup>                       | 2.830 10 <sup>-3</sup> | 8.405 10 <sup>-4</sup> | 3.896 10 <sup>-4</sup> | 1.661 10 <sup>-4</sup> | 5.181 10 <sup>-5</sup> |
| 3     | WE           | Electricity by coal                                                                                                   | 3.926%      | 4.955 10 <sup>-4</sup>                       | 2.234 10 <sup>-3</sup> | 6.634 10 <sup>-4</sup> | 3.076 10 <sup>-4</sup> | 1.311 10 <sup>-4</sup> | 4.089 10 <sup>-5</sup> |
| 4     | WE           | Steam and hot water supply services                                                                                   | 3.283%      | 4.144 10 <sup>-4</sup>                       | 1.868 10 <sup>-3</sup> | 5.549 10 <sup>-4</sup> | 2.572 10 <sup>-4</sup> | 1.097 10 <sup>-4</sup> | 3.420 10 <sup>-5</sup> |
| 5     | WE           | Electricity by hydro                                                                                                  | 2.047%      | 2.583 10 <sup>-4</sup>                       | 1.165 10 <sup>-3</sup> | 3.459 10 <sup>-4</sup> | 1.604 10 <sup>-4</sup> | 6.835 10 <sup>-5</sup> | 2.132 10 <sup>-5</sup> |
| 6     | WE           | Construction work (45)                                                                                                | 0.587%      | 7.407 10 <sup>-5</sup>                       | 3.339 10 <sup>-4</sup> | 9.917 10 <sup>-5</sup> | 4.598 10 <sup>-5</sup> | 1.960 10 <sup>-5</sup> | 6.113 10 <sup>-6</sup> |
| 7     | WE           | Wholesale trade and commission trade services, except of motor vehicles and motorcycles (51)                          | 0.277%      | 3.497 10 <sup>-5</sup>                       | 1.577 10 <sup>-4</sup> | 4.682 10 <sup>-5</sup> | 2.171 10 <sup>-5</sup> | 9.253 10 <sup>-6</sup> | 2.886 10 <sup>-6</sup> |
| 8     | WE           | Retail trade services, except of motor vehicles and motorcycles; repair services of personal and household goods (52) | 0.227%      | 2.870 10 <sup>-5</sup>                       | 1.294 10 <sup>-4</sup> | 3.842 10 <sup>-5</sup> | 1.781 10 <sup>-5</sup> | 7.593 10 <sup>-6</sup> | 2.368 10 <sup>-6</sup> |
| 9     | RU           | Heavy Fuel Oil                                                                                                        | 0.218%      | 2.750 10 <sup>-5</sup>                       | 1.240 10 <sup>-4</sup> | 3.682 10 <sup>-5</sup> | 1.707 10 <sup>-5</sup> | 7.275 10 <sup>-6</sup> | 2.269 10 <sup>-6</sup> |
| 10    | CN           | Electricity by coal                                                                                                   | 0.216%      | 2.723 10 <sup>-5</sup>                       | 1.227 10 <sup>-4</sup> | 3.646 10 <sup>-5</sup> | 1.690 10 <sup>-5</sup> | 7.204 10 <sup>-6</sup> | 2.247 10 <sup>-6</sup> |
| 11    | RU           | Steam and hot water supply services                                                                                   | 0.204%      | 2.576 10 <sup>-5</sup>                       | 1.161 10 <sup>-4</sup> | 3.449 10 <sup>-5</sup> | 1.599 10 <sup>-5</sup> | 6.816 10 <sup>-6</sup> | 2.126 10 <sup>-6</sup> |
| 12    | WE           | Cement, lime and plaster                                                                                              | 0.204%      | 2.571 10 <sup>-5</sup>                       | 1.159 10 <sup>-4</sup> | 3.443 10 <sup>-5</sup> | 1.596 10 <sup>-5</sup> | 6.804 10 <sup>-6</sup> | 2.122 10 <sup>-6</sup> |
| 13    | WE           | Poultry                                                                                                               | 0.135%      | 1.699 10 <sup>-5</sup>                       | 7.659 10 <sup>-5</sup> | 2.275 10 <sup>-5</sup> | 1.055 10 <sup>-5</sup> | 4.495 10 <sup>-6</sup> | 1.402 10 <sup>-6</sup> |
| 14    | WE           | Other business services (74)                                                                                          | 0.132%      | 1.664 10 <sup>-5</sup>                       | 7.500 10 <sup>-5</sup> | 2.228 10 <sup>-5</sup> | 1.033 10 <sup>-5</sup> | 4.402 10 <sup>-6</sup> | 1.373 10 <sup>-6</sup> |

|    |    |                                                                     |        |                        |                        |                        |                        |                        |                        |
|----|----|---------------------------------------------------------------------|--------|------------------------|------------------------|------------------------|------------------------|------------------------|------------------------|
| 15 | WE | Blast Furnace Gas                                                   | 0.129% | 1.634 10 <sup>-5</sup> | 7.365 10 <sup>-5</sup> | 2.187 10 <sup>-5</sup> | 1.014 10 <sup>-5</sup> | 4.322 10 <sup>-6</sup> | 1.348 10 <sup>-6</sup> |
| 16 | WE | Coke oven gas                                                       | 0.124% | 1.564 10 <sup>-5</sup> | 7.052 10 <sup>-5</sup> | 2.094 10 <sup>-5</sup> | 9.710 10 <sup>-6</sup> | 4.139 10 <sup>-6</sup> | 1.291 10 <sup>-6</sup> |
| 17 | RU | Transportation services via pipelines                               | 0.115% | 1.448 10 <sup>-5</sup> | 6.530 10 <sup>-5</sup> | 1.939 10 <sup>-5</sup> | 8.990 10 <sup>-6</sup> | 3.832 10 <sup>-6</sup> | 1.195 10 <sup>-6</sup> |
| 18 | RU | Gas/Diesel Oil                                                      | 0.095% | 1.204 10 <sup>-5</sup> | 5.427 10 <sup>-5</sup> | 1.612 10 <sup>-5</sup> | 7.473 10 <sup>-6</sup> | 3.185 10 <sup>-6</sup> | 9.935 10 <sup>-7</sup> |
| 19 | WE | Natural Gas Liquids                                                 | 0.086% | 1.084 10 <sup>-5</sup> | 4.888 10 <sup>-5</sup> | 1.452 10 <sup>-5</sup> | 6.730 10 <sup>-6</sup> | 2.869 10 <sup>-6</sup> | 8.948 10 <sup>-7</sup> |
| 20 | RU | Basic iron and steel and of ferro-alloys and first products thereof | 0.084% | 1.061 10 <sup>-5</sup> | 4.783 10 <sup>-5</sup> | 1.420 10 <sup>-5</sup> | 6.585 10 <sup>-6</sup> | 2.807 10 <sup>-6</sup> | 8.755 10 <sup>-7</sup> |

e) Iceland

Table 34: Carbon Footprint Distribution of Bitcoin mining energy consumption in Iceland per transaction by country

| Order | Country Code | P.A.D.* (%) | GWP per transaction per year (kgCO2-equiv.) |          |          |          |          |          |
|-------|--------------|-------------|---------------------------------------------|----------|----------|----------|----------|----------|
|       |              |             | 2020                                        | 2019     | 2018     | 2017     | 2016     | 2015     |
| 1     | WE           | 66.470%     | 5.695668                                    | 3.738906 | 3.172034 | 0.554114 | 0.172840 | 0.070224 |
| 2     | RU           | 8.125%      | 0.696177                                    | 0.457003 | 0.387715 | 0.067729 | 0.021126 | 0.008583 |
| 3     | CN           | 4.289%      | 0.367536                                    | 0.241268 | 0.204688 | 0.035756 | 0.011153 | 0.004532 |
| 4     | WA           | 3.298%      | 0.282615                                    | 0.185522 | 0.157394 | 0.027495 | 0.008576 | 0.003484 |
| 5     | WM           | 3.082%      | 0.264066                                    | 0.173345 | 0.147064 | 0.025690 | 0.008013 | 0.003256 |
| 6     | US           | 1.778%      | 0.152377                                    | 0.100027 | 0.084862 | 0.014824 | 0.004624 | 0.001879 |
| 7     | DE           | 1.129%      | 0.096708                                    | 0.063483 | 0.053858 | 0.009408 | 0.002935 | 0.001192 |
| 8     | IN           | 0.932%      | 0.079884                                    | 0.052440 | 0.044489 | 0.007772 | 0.002424 | 0.000985 |
| 9     | IT           | 0.707%      | 0.060572                                    | 0.039762 | 0.033734 | 0.005893 | 0.001838 | 0.000747 |
| 10    | KR           | 0.628%      | 0.053840                                    | 0.035343 | 0.029985 | 0.005238 | 0.001634 | 0.000664 |

*Table 35: Carbon Footprint Distribution of Bitcoin mining energy consumption in Iceland per transaction by sector in Supply Chain*

| Order | Country Code | Sector                                                                                                                | P.A.D.* (%) | GWP per transaction per year (kgCO <sub>2</sub> -eqv.) |          |          |           |          |            |
|-------|--------------|-----------------------------------------------------------------------------------------------------------------------|-------------|--------------------------------------------------------|----------|----------|-----------|----------|------------|
|       |              |                                                                                                                       |             | 2020                                                   | 2019     | 2018     | 2017      | 2016     | 2015       |
| 1     | WE           | Electricity by hydro                                                                                                  | 18.903%     | 1.619751                                               | 1.063281 | 0.902072 | 0.1575805 | 0.049153 | 0.01997064 |
| 2     | WE           | Electricity by coal                                                                                                   | 13.525%     | 1.158887                                               | 0.760748 | 0.645408 | 0.1127444 | 0.035167 | 0.01428843 |
| 3     | WE           | Distribution services of gaseous fuels through mains                                                                  | 7.880%      | 0.675220                                               | 0.443246 | 0.376044 | 0.0656900 | 0.020490 | 0.00832509 |
| 4     | WE           | Steam and hot water supply services                                                                                   | 6.853%      | 0.587227                                               | 0.385483 | 0.327039 | 0.0571294 | 0.017820 | 0.00724018 |
| 5     | WE           | Construction work (45)                                                                                                | 3.202%      | 0.274407                                               | 0.180134 | 0.152823 | 0.026696  | 0.008327 | 0.00338329 |
| 6     | CN           | Electricity by coal                                                                                                   | 1.909%      | 0.163556                                               | 0.107366 | 0.091088 | 0.0159118 | 0.004963 | 0.00201656 |
| 7     | RU           | Steam and hot water supply services                                                                                   | 1.519%      | 0.130129                                               | 0.085423 | 0.072471 | 0.0126598 | 0.003949 | 0.00160441 |
| 8     | RU           | Heavy Fuel Oil                                                                                                        | 1.383%      | 0.118500                                               | 0.077789 | 0.065995 | 0.0115284 | 0.003596 | 0.00146103 |
| 9     | WE           | Wholesale trade and commission trade services, except of motor vehicles and motorcycles (51)                          | 1.284%      | 0.109989                                               | 0.072202 | 0.061255 | 0.0107005 | 0.003338 | 0.00135611 |
| 10    | WE           | Retail trade services, except of motor vehicles and motorcycles; repair services of personal and household goods (52) | 1.167%      | 0.100010                                               | 0.065651 | 0.055698 | 0.0097296 | 0.003035 | 0.00123307 |
| 11    | WE           | Cement, lime and plaster                                                                                              | 1.093%      | 0.093659                                               | 0.061482 | 0.052161 | 0.0091118 | 0.002842 | 0.00115477 |
| 12    | WE           | Poultry                                                                                                               | 0.876%      | 0.075091                                               | 0.049294 | 0.041820 | 0.0073054 | 0.002279 | 0.00092584 |
| 13    | WE           | Electricity by solar thermal                                                                                          | 0.873%      | 0.074785                                               | 0.049092 | 0.041649 | 0.0072755 | 0.002269 | 0.00092205 |
| 14    | WE           | Electricity by gas                                                                                                    | 0.843%      | 0.072272                                               | 0.047443 | 0.040250 | 0.0070311 | 0.002193 | 0.00089107 |
| 15    | RU           | Transportation services via pipelines                                                                                 | 0.684%      | 0.058586                                               | 0.038459 | 0.032628 | 0.0056996 | 0.001778 | 0.00072233 |

|           |    |                                                                     |        |          |          |          |           |          |            |
|-----------|----|---------------------------------------------------------------------|--------|----------|----------|----------|-----------|----------|------------|
| <b>16</b> | CN | Basic iron and steel and of ferro-alloys and first products thereof | 0.647% | 0.055473 | 0.036415 | 0.030894 | 0.0053967 | 0.001683 | 0.00068395 |
| <b>17</b> | WE | Other business services (74)                                        | 0.592% | 0.050731 | 0.033302 | 0.028253 | 0.0049354 | 0.001539 | 0.00062549 |
| <b>18</b> | US | Electricity by coal                                                 | 0.561% | 0.048112 | 0.031583 | 0.026795 | 0.0046807 | 0.001460 | 0.0005932  |
| <b>19</b> | RU | Gas/Diesel Oil                                                      | 0.532% | 0.045592 | 0.029928 | 0.025391 | 0.0044354 | 0.001384 | 0.00056212 |
| <b>20</b> | WE | Pigs                                                                | 0.524% | 0.044881 | 0.029462 | 0.024995 | 0.0043663 | 0.001362 | 0.00055336 |

*Table 36: Total Annual Carbon Footprint Distribution of Bitcoin mining energy consumption in Iceland by country*

| Order     | Country Code | P.A.D.* (%) | Total GWP per year (MtCO <sub>2</sub> -eqv.) |                        |                        |                        |                        |                        |
|-----------|--------------|-------------|----------------------------------------------|------------------------|------------------------|------------------------|------------------------|------------------------|
|           |              |             | 2020                                         | 2019                   | 2018                   | 2017                   | 2016                   | 2015                   |
| <b>1</b>  | WE           | 66.470%     | 1.751 10 <sup>-3</sup>                       | 7.896 10 <sup>-3</sup> | 2.345 10 <sup>-3</sup> | 1.087 10 <sup>-3</sup> | 4.634 10 <sup>-4</sup> | 1.445 10 <sup>-4</sup> |
| <b>2</b>  | RU           | 8.125%      | 2.141 10 <sup>-4</sup>                       | 9.651 10 <sup>-4</sup> | 2.866 10 <sup>-4</sup> | 1.329 10 <sup>-4</sup> | 5.664 10 <sup>-5</sup> | 1.767 10 <sup>-5</sup> |
| <b>3</b>  | CN           | 4.289%      | 1.130 10 <sup>-4</sup>                       | 5.095 10 <sup>-4</sup> | 1.513 10 <sup>-4</sup> | 7.015 10 <sup>-5</sup> | 2.990 10 <sup>-5</sup> | 9.327 10 <sup>-6</sup> |
| <b>4</b>  | WA           | 3.298%      | 8.691 10 <sup>-5</sup>                       | 3.918 10 <sup>-4</sup> | 1.164 10 <sup>-4</sup> | 5.394 10 <sup>-5</sup> | 2.299 10 <sup>-5</sup> | 7.172 10 <sup>-6</sup> |
| <b>5</b>  | WM           | 3.082%      | 8.120 10 <sup>-5</sup>                       | 3.661 10 <sup>-4</sup> | 1.087 10 <sup>-4</sup> | 5.040 10 <sup>-5</sup> | 2.148 10 <sup>-5</sup> | 6.701 10 <sup>-6</sup> |
| <b>6</b>  | US           | 1.778%      | 4.686 10 <sup>-5</sup>                       | 2.112 10 <sup>-4</sup> | 6.274 10 <sup>-5</sup> | 2.908 10 <sup>-5</sup> | 1.240 10 <sup>-5</sup> | 3.867 10 <sup>-6</sup> |
| <b>7</b>  | DE           | 1.129%      | 2.974 10 <sup>-5</sup>                       | 1.341 10 <sup>-4</sup> | 3.982 10 <sup>-5</sup> | 1.846 10 <sup>-5</sup> | 7.868 10 <sup>-6</sup> | 2.454 10 <sup>-6</sup> |
| <b>8</b>  | IN           | 0.932%      | 2.457 10 <sup>-5</sup>                       | 1.107 10 <sup>-4</sup> | 3.289 10 <sup>-5</sup> | 1.525 10 <sup>-5</sup> | 6.499 10 <sup>-6</sup> | 2.027 10 <sup>-6</sup> |
| <b>9</b>  | IT           | 0.707%      | 1.863 10 <sup>-5</sup>                       | 8.397 10 <sup>-5</sup> | 2.494 10 <sup>-5</sup> | 1.156 10 <sup>-5</sup> | 4.928 10 <sup>-6</sup> | 1.537 10 <sup>-6</sup> |
| <b>10</b> | KR           | 0.628%      | 1.656 10 <sup>-5</sup>                       | 7.464 10 <sup>-5</sup> | 2.217 10 <sup>-5</sup> | 1.028 10 <sup>-5</sup> | 4.380 10 <sup>-6</sup> | 1.366 10 <sup>-6</sup> |



Table 37: Total Annual Carbon Footprint Distribution of Bitcoin mining energy consumption in Iceland by sector

| Order | Country Code | Sector                                                                                                                | P.A.D.* (%) | Total GWP per year (MtCO <sub>2</sub> -eqv.) |                        |                        |                        |                        |                        |
|-------|--------------|-----------------------------------------------------------------------------------------------------------------------|-------------|----------------------------------------------|------------------------|------------------------|------------------------|------------------------|------------------------|
|       |              |                                                                                                                       |             | 2020                                         | 2019                   | 2018                   | 2017                   | 2016                   | 2015                   |
| 1     | WE           | Electricity by hydro                                                                                                  | 18.903%     | 4.981 10 <sup>-4</sup>                       | 2.245 10 <sup>-3</sup> | 6.669 10 <sup>-4</sup> | 3.092 10 <sup>-4</sup> | 1.318 10 <sup>-4</sup> | 4.110 10 <sup>-5</sup> |
| 2     | WE           | Electricity by coal                                                                                                   | 13.525%     | 3.564 10 <sup>-4</sup>                       | 1.607 10 <sup>-3</sup> | 4.771 10 <sup>-4</sup> | 2.212 10 <sup>-4</sup> | 9.429 10 <sup>-5</sup> | 2.941 10 <sup>-5</sup> |
| 3     | WE           | Distribution services of gaseous fuels through mains                                                                  | 7.880%      | 2.076 10 <sup>-4</sup>                       | 9.360 10 <sup>-4</sup> | 2.780 10 <sup>-4</sup> | 1.289 10 <sup>-4</sup> | 5.494 10 <sup>-5</sup> | 1.714 10 <sup>-5</sup> |
| 4     | WE           | Steam and hot water supply services                                                                                   | 6.853%      | 1.806 10 <sup>-4</sup>                       | 8.140 10 <sup>-4</sup> | 2.418 10 <sup>-4</sup> | 1.121 10 <sup>-4</sup> | 4.778 10 <sup>-5</sup> | 1.490 10 <sup>-5</sup> |
| 5     | WE           | Construction work (45)                                                                                                | 3.202%      | 8.438 10 <sup>-5</sup>                       | 3.804 10 <sup>-4</sup> | 1.130 10 <sup>-4</sup> | 5.238 10 <sup>-5</sup> | 2.233 10 <sup>-5</sup> | 6.964 10 <sup>-6</sup> |
| 6     | CN           | Electricity by coal                                                                                                   | 1.909%      | 5.030 10 <sup>-5</sup>                       | 2.267 10 <sup>-4</sup> | 6.734 10 <sup>-5</sup> | 3.122 10 <sup>-5</sup> | 1.331 10 <sup>-5</sup> | 4.151 10 <sup>-6</sup> |
| 7     | RU           | Steam and hot water supply services                                                                                   | 1.519%      | 4.002 10 <sup>-5</sup>                       | 1.804 10 <sup>-4</sup> | 5.358 10 <sup>-5</sup> | 2.484 10 <sup>-5</sup> | 1.059 10 <sup>-5</sup> | 3.302 10 <sup>-6</sup> |
| 8     | RU           | Heavy Fuel Oil                                                                                                        | 1.383%      | 3.644 10 <sup>-5</sup>                       | 1.643 10 <sup>-4</sup> | 4.879 10 <sup>-5</sup> | 2.262 10 <sup>-5</sup> | 9.641 10 <sup>-6</sup> | 3.007 10 <sup>-6</sup> |
| 9     | WE           | Wholesale trade and commission trade services, except of motor vehicles and motorcycles (51)                          | 1.284%      | 3.382 10 <sup>-5</sup>                       | 1.525 10 <sup>-4</sup> | 4.528 10 <sup>-5</sup> | 2.099 10 <sup>-5</sup> | 8.949 10 <sup>-6</sup> | 2.791 10 <sup>-6</sup> |
| 10    | WE           | Retail trade services, except of motor vehicles and motorcycles; repair services of personal and household goods (52) | 1.167%      | 3.075 10 <sup>-5</sup>                       | 1.386 10 <sup>-4</sup> | 4.118 10 <sup>-5</sup> | 1.909 10 <sup>-5</sup> | 8.137 10 <sup>-6</sup> | 2.538 10 <sup>-6</sup> |
| 11    | WE           | Cement, lime and plaster                                                                                              | 1.093%      | 2.880 10 <sup>-5</sup>                       | 1.298 10 <sup>-4</sup> | 3.856 10 <sup>-5</sup> | 1.788 10 <sup>-5</sup> | 7.620 10 <sup>-6</sup> | 2.377 10 <sup>-6</sup> |
| 12    | WE           | Poultry                                                                                                               | 0.876%      | 2.309 10 <sup>-5</sup>                       | 1.041 10 <sup>-4</sup> | 3.092 10 <sup>-5</sup> | 1.433 10 <sup>-5</sup> | 6.110 10 <sup>-6</sup> | 1.906 10 <sup>-6</sup> |
| 13    | WE           | Electricity by solar thermal                                                                                          | 0.873%      | 2.300 10 <sup>-5</sup>                       | 1.037 10 <sup>-4</sup> | 3.079 10 <sup>-5</sup> | 1.427 10 <sup>-5</sup> | 6.085 10 <sup>-6</sup> | 1.898 10 <sup>-6</sup> |

|           |    |                                                                     |        |                       |                       |                       |                       |                       |                       |
|-----------|----|---------------------------------------------------------------------|--------|-----------------------|-----------------------|-----------------------|-----------------------|-----------------------|-----------------------|
| <b>14</b> | WE | Electricity by gas                                                  | 0.843% | $2.222 \cdot 10^{-5}$ | $1.002 \cdot 10^{-4}$ | $2.976 \cdot 10^{-5}$ | $1.379 \cdot 10^{-5}$ | $5.880 \cdot 10^{-6}$ | $1.834 \cdot 10^{-6}$ |
| <b>15</b> | RU | Transportation services via pipelines                               | 0.684% | $1.802 \cdot 10^{-5}$ | $8.122 \cdot 10^{-5}$ | $2.412 \cdot 10^{-5}$ | $1.118 \cdot 10^{-5}$ | $4.767 \cdot 10^{-6}$ | $1.487 \cdot 10^{-6}$ |
| <b>16</b> | CN | Basic iron and steel and of ferro-alloys and first products thereof | 0.647% | $1.706 \cdot 10^{-5}$ | $7.690 \cdot 10^{-5}$ | $2.284 \cdot 10^{-5}$ | $1.059 \cdot 10^{-5}$ | $4.513 \cdot 10^{-6}$ | $1.408 \cdot 10^{-6}$ |
| <b>17</b> | WE | Other business services (74)                                        | 0.592% | $1.560 \cdot 10^{-5}$ | $7.033 \cdot 10^{-5}$ | $2.089 \cdot 10^{-5}$ | $9.683 \cdot 10^{-6}$ | $4.128 \cdot 10^{-6}$ | $1.287 \cdot 10^{-6}$ |
| <b>18</b> | US | Electricity by coal                                                 | 0.561% | $1.480 \cdot 10^{-5}$ | $6.670 \cdot 10^{-5}$ | $1.981 \cdot 10^{-5}$ | $9.183 \cdot 10^{-6}$ | $3.914 \cdot 10^{-6}$ | $1.221 \cdot 10^{-6}$ |
| <b>19</b> | RU | Gas/Diesel Oil                                                      | 0.532% | $1.402 \cdot 10^{-5}$ | $6.320 \cdot 10^{-5}$ | $1.877 \cdot 10^{-5}$ | $8.702 \cdot 10^{-6}$ | $3.709 \cdot 10^{-6}$ | $1.157 \cdot 10^{-6}$ |
| <b>20</b> | WE | Pigs                                                                | 0.524% | $1.380 \cdot 10^{-5}$ | $6.222 \cdot 10^{-5}$ | $1.848 \cdot 10^{-5}$ | $8.567 \cdot 10^{-6}$ | $3.652 \cdot 10^{-6}$ | $1.139 \cdot 10^{-6}$ |

## f) USA

Table 38: Carbon Footprint Distribution of Bitcoin mining energy consumption in USA per transaction by country

| Order | Total GWP per year (MtCO <sub>2</sub> -eqv.) |             |         |       |             |                      |       |             |                      |       |             |                      |       |             |                      |       |             |                      |
|-------|----------------------------------------------|-------------|---------|-------|-------------|----------------------|-------|-------------|----------------------|-------|-------------|----------------------|-------|-------------|----------------------|-------|-------------|----------------------|
|       | 2020                                         |             |         | 2019  |             |                      | 2018  |             |                      | 2017  |             |                      | 2016  |             |                      | 2015  |             |                      |
|       | C. C.                                        | P.A.D.* (%) | GWP     | C. C. | P.A.D.* (%) | GWP                  | C. C. | P.A.D.* (%) | GWP                  | C. C. | P.A.D.* (%) | GWP                  | C. C. | P.A.D.* (%) | GWP                  | C. C. | P.A.D.* (%) | GWP                  |
| 1     | US                                           | 85.76 %     | 322.310 | US    | 88.25 %     | 211.507              | US    | 88.85 %     | 179.425              | US    | 91.07 %     | 31.334               | US    | 91.14 %     | 9.774                | US    | 89.78 %     | 3.972                |
| 2     | CN                                           | 12.85 %     | 48.307  | CN    | 10.57 %     | 25.340               | CN    | 10.02 %     | 20.227               | CN    | 7.99%       | 2.750                | CN    | 7.92%       | 8.4910 <sup>-1</sup> | CN    | 9.17 %      | 4.0610 <sup>-1</sup> |
| 3     | JP                                           | 0.21%       | 0.781   | JP    | 0.17%       | 4.1110 <sup>-1</sup> | JP    | 0.16%       | 3.2810 <sup>-1</sup> | JP    | 0.13%       | 4.4710 <sup>-2</sup> | JP    | 0.13%       | 1.3810 <sup>-2</sup> | JP    | 0.15 %      | 6.5910 <sup>-3</sup> |
| 4     | WA                                           | 0.20%       | 0.747   | WA    | 0.17%       | 3.9510 <sup>-1</sup> | WA    | 0.16%       | 3.1610 <sup>-1</sup> | WA    | 0.13%       | 4.3510 <sup>-2</sup> | WA    | 0.13%       | 1.3410 <sup>-2</sup> | WA    | 0.14 %      | 6.3710 <sup>-3</sup> |
| 5     | KR                                           | 0.16%       | 0.602   | KR    | 0.13%       | 3.1710 <sup>-1</sup> | KR    | 0.13%       | 2.5310 <sup>-1</sup> | KR    | 0.10%       | 3.4510 <sup>-2</sup> | KR    | 0.10%       | 1.0710 <sup>-2</sup> | KR    | 0.12 %      | 5.0810 <sup>-3</sup> |
| 6     | WM                                           | 0.15%       | 0.575   | WM    | 0.13%       | 3.0610 <sup>-1</sup> | WM    | 0.12%       | 2.4510 <sup>-1</sup> | WM    | 0.10%       | 3.410 <sup>-2</sup>  | WM    | 0.10%       | 1.0510 <sup>-2</sup> | WM    | 0.11 %      | 4.9510 <sup>-3</sup> |
| 7     | RU                                           | 0.10%       | 0.386   | RU    | 0.09%       | 2.1810 <sup>-1</sup> | RU    | 0.09%       | 1.7810 <sup>-1</sup> | RU    | 0.08%       | 2.6910 <sup>-2</sup> | RU    | 0.08%       | 8.3310 <sup>-3</sup> | RU    | 0.08 %      | 3.7210 <sup>-3</sup> |
| 8     | DE                                           | 0.10%       | 0.376   | DE    | 0.08%       | 1.9910 <sup>-1</sup> | DE    | 0.08%       | 1.5910 <sup>-1</sup> | WL    | 0.07%       | 2.2810 <sup>-2</sup> | WL    | 0.07%       | 7.0810 <sup>-3</sup> | DE    | 0.07 %      | 3.2110 <sup>-3</sup> |
| 9     | WL                                           | 0.08%       | 0.281   | WL    | 0.07%       | 1.710 <sup>-1</sup>  | WL    | 0.07%       | 1.4110 <sup>-1</sup> | DE    | 0.06%       | 2.210 <sup>-2</sup>  | DE    | 0.06%       | 6.7910 <sup>-3</sup> | WL    | 0.07 %      | 3.0210 <sup>-3</sup> |
| 10    | IN                                           | 0.05%       | 0.177   | IN    | 0.04%       | 9.4310 <sup>-2</sup> | IN    | 0.04%       | 7.5710 <sup>-2</sup> | IN    | 0.03%       | 1.0610 <sup>-2</sup> | IN    | 0.03%       | 3.2710 <sup>-3</sup> | IN    | 0.04 %      | 1.5310 <sup>-3</sup> |

Table 39: Carbon Footprint Distribution of Bitcoin mining energy consumption in USA per transaction by sector in Supply Chain

| Order | Country Code | Sector                                                                                                                | P.A.D.* (%) | GWP per transaction per year (kgCO2-equiv.) |            |            |           |          |          |
|-------|--------------|-----------------------------------------------------------------------------------------------------------------------|-------------|---------------------------------------------|------------|------------|-----------|----------|----------|
|       |              |                                                                                                                       |             | 2020                                        | 2019       | 2018       | 2017      | 2016     | 2015     |
| 1     | US           | Electricity by coal                                                                                                   | 56.791%     | 183.149687                                  | 120.228116 | 101.999789 | 17.818066 | 5.557833 | 2.258135 |
| 2     | US           | Electricity by gas                                                                                                    | 41.142%     | 132.681598                                  | 87.098476  | 73.893083  | 12.90818  | 4.026336 | 1.635891 |
| 3     | US           | Electricity by petroleum and other oil derivatives                                                                    | 0.659%      | 2.125696                                    | 1.395407   | 1.183843   | 0.2068024 | 0.064506 | 0.026209 |
| 4     | US           | Electricity by biomass and waste                                                                                      | 0.604%      | 1.947295                                    | 1.278296   | 1.084488   | 0.1894462 | 0.059092 | 0.024009 |
| 5     | US           | Other Bituminous Coal                                                                                                 | 0.232%      | 0.749653                                    | 0.492108   | 0.417497   | 0.0729314 | 0.022749 | 0.009243 |
| 6     | US           | Transportation services via pipelines                                                                                 | 0.102%      | 0.330010                                    | 0.216634   | 0.183789   | 0.0321056 | 0.010014 | 0.004069 |
| 7     | US           | Retail trade services, except of motor vehicles and motorcycles; repair services of personal and household goods (52) | 0.086%      | 0.276179                                    | 0.181297   | 0.153810   | 0.0268686 | 0.008381 | 0.003405 |
| 8     | US           | Sub-Bituminous Coal                                                                                                   | 0.029%      | 0.093179                                    | 0.061167   | 0.051893   | 0.0090651 | 0.002828 | 0.001149 |
| 9     | US           | Electricity by nuclear                                                                                                | 0.019%      | 0.061936                                    | 0.040658   | 0.034494   | 0.0060255 | 0.001880 | 0.000764 |
| 10    | US           | Retail trade services of motor fuel                                                                                   | 0.018%      | 0.059098                                    | 0.038794   | 0.032913   | 0.0057494 | 0.001793 | 0.000729 |
| 11    | US           | Air transport services (62)                                                                                           | 0.017%      | 0.055055                                    | 0.036141   | 0.030661   | 0.0053561 | 0.001671 | 0.000679 |
| 12    | RU           | Heavy Fuel Oil                                                                                                        | 0.015%      | 0.049414                                    | 0.032437   | 0.027519   | 0.0048072 | 0.001499 | 0.000609 |
| 13    | US           | Railway transportation services                                                                                       | 0.013%      | 0.043451                                    | 0.028524   | 0.024199   | 0.0042272 | 0.001319 | 0.000536 |
| 14    | CN           | Electricity by coal                                                                                                   | 0.013%      | 0.041566                                    | 0.027286   | 0.023149   | 0.0040437 | 0.001261 | 0.000512 |
| 15    | WL           | Heavy Fuel Oil                                                                                                        | 0.011%      | 0.035360                                    | 0.023212   | 0.019693   | 0.0034400 | 0.001073 | 0.000436 |

|           |    |                                                                                   |        |          |          |          |           |          |          |
|-----------|----|-----------------------------------------------------------------------------------|--------|----------|----------|----------|-----------|----------|----------|
| <b>16</b> | WL | Crude petroleum and services related to crude oil extraction, excluding surveying | 0.011% | 0.034211 | 0.022458 | 0.019053 | 0.0033282 | 0.001038 | 0.000422 |
| <b>17</b> | MX | Heavy Fuel Oil                                                                    | 0.010% | 0.030998 | 0.020349 | 0.017263 | 0.0030157 | 0.000941 | 0.000382 |
| <b>18</b> | RU | Steam and hot water supply services                                               | 0.009% | 0.028765 | 0.018882 | 0.016020 | 0.0027984 | 0.000873 | 0.000355 |
| <b>19</b> | WL | Petroleum Coke                                                                    | 0.009% | 0.027482 | 0.018040 | 0.015305 | 0.0026736 | 0.000834 | 0.000339 |
| <b>20</b> | US | Steam and hot water supply services                                               | 0.008% | 0.027049 | 0.017756 | 0.015064 | 0.0026314 | 0.000821 | 0.000333 |

*Table 40: Total Annual Carbon Footprint Distribution of Bitcoin mining energy consumption in USA by country*

| Order     | Country Code | P.A.D.* (%) | Total GWP per year (MtCO <sub>2</sub> -eqv.) |                        |                        |                        |                        |                        |
|-----------|--------------|-------------|----------------------------------------------|------------------------|------------------------|------------------------|------------------------|------------------------|
|           |              |             | 2020                                         | 2019                   | 2018                   | 2017                   | 2016                   | 2015                   |
| <b>1</b>  | US           | 99.770%     | 5.835                                        | 2.922                  | 1.376                  | 3.065 10 <sup>-1</sup> | 1.224 10 <sup>-1</sup> | 3.503 10 <sup>-2</sup> |
| <b>2</b>  | WL           | 0.052%      | 3.045 10 <sup>-3</sup>                       | 1.525 10 <sup>-3</sup> | 7.179 10 <sup>-4</sup> | 1.599 10 <sup>-4</sup> | 6.388 10 <sup>-5</sup> | 1.828 10 <sup>-5</sup> |
| <b>3</b>  | RU           | 0.038%      | 2.213 10 <sup>-3</sup>                       | 1.108 10 <sup>-3</sup> | 5.217 10 <sup>-4</sup> | 1.162 10 <sup>-4</sup> | 4.642 10 <sup>-5</sup> | 1.329 10 <sup>-5</sup> |
| <b>4</b>  | CN           | 0.027%      | 1.590 10 <sup>-3</sup>                       | 7.961 10 <sup>-4</sup> | 3.748 10 <sup>-4</sup> | 8.349 10 <sup>-5</sup> | 3.335 10 <sup>-5</sup> | 9.544 10 <sup>-6</sup> |
| <b>5</b>  | MX           | 0.022%      | 1.287 10 <sup>-3</sup>                       | 6.443 10 <sup>-4</sup> | 3.033 10 <sup>-4</sup> | 6.757 10 <sup>-5</sup> | 2.699 10 <sup>-5</sup> | 7.725 10 <sup>-6</sup> |
| <b>6</b>  | CA           | 0.022%      | 1.258 10 <sup>-3</sup>                       | 6.299 10 <sup>-4</sup> | 2.966 10 <sup>-4</sup> | 6.606 10 <sup>-5</sup> | 2.639 10 <sup>-5</sup> | 7.552 10 <sup>-6</sup> |
| <b>7</b>  | WM           | 0.010%      | 5.714 10 <sup>-4</sup>                       | 2.862 10 <sup>-4</sup> | 1.347 10 <sup>-4</sup> | 3.001 10 <sup>-5</sup> | 1.199 10 <sup>-5</sup> | 3.431 10 <sup>-6</sup> |
| <b>8</b>  | WA           | 0.008%      | 4.733 10 <sup>-4</sup>                       | 2.370 10 <sup>-4</sup> | 1.116 10 <sup>-4</sup> | 2.486 10 <sup>-5</sup> | 9.929 10 <sup>-6</sup> | 2.842 10 <sup>-6</sup> |
| <b>9</b>  | WF           | 0.005%      | 2.999 10 <sup>-4</sup>                       | 1.502 10 <sup>-4</sup> | 7.072 10 <sup>-5</sup> | 1.575 10 <sup>-5</sup> | 6.293 10 <sup>-6</sup> | 1.801 10 <sup>-6</sup> |
| <b>10</b> | GB           | 0.004%      | 2.536 10 <sup>-4</sup>                       | 1.270 10 <sup>-4</sup> | 5.980 10 <sup>-5</sup> | 1.332 10 <sup>-5</sup> | 5.321 10 <sup>-6</sup> | 1.523 10 <sup>-6</sup> |

*Table 41: Total Annual Carbon Footprint Distribution of Bitcoin mining energy consumption in USA by sector*

| Order | Country Code | Sector                                                                                                                | P.A.D.* (%) | Total GWP per year (MtCO <sub>2</sub> -eqv.) |                        |                        |                        |                        |                        |
|-------|--------------|-----------------------------------------------------------------------------------------------------------------------|-------------|----------------------------------------------|------------------------|------------------------|------------------------|------------------------|------------------------|
|       |              |                                                                                                                       |             | 2020                                         | 2019                   | 2018                   | 2017                   | 2016                   | 2015                   |
| 1     | US           | Electricity by coal                                                                                                   | 56.791%     | 3.321                                        | 1.663                  | 7.831 10 <sup>-1</sup> | 1.327                  | 6.968 10 <sup>-2</sup> | 1.994 10 <sup>-2</sup> |
| 2     | US           | Electricity by gas                                                                                                    | 41.142%     | 2.406                                        | 1.205                  | 5.673 10 <sup>-1</sup> | 9.613 10 <sup>-1</sup> | 5.048 10 <sup>-2</sup> | 1.445 10 <sup>-2</sup> |
| 3     | US           | Electricity by petroleum and other oil derivatives                                                                    | 0.659%      | 3.855 10 <sup>-2</sup>                       | 1.931 10 <sup>-2</sup> | 9.089 10 <sup>-3</sup> | 1.540 10 <sup>-2</sup> | 8.088 10 <sup>-4</sup> | 2.315 10 <sup>-4</sup> |
| 4     | US           | Electricity by biomass and waste                                                                                      | 0.604%      | 3.531 10 <sup>-2</sup>                       | 1.769 10 <sup>-2</sup> | 8.326 10 <sup>-3</sup> | 1.411 10 <sup>-2</sup> | 7.409 10 <sup>-4</sup> | 2.120 10 <sup>-4</sup> |
| 5     | US           | Other Bituminous Coal                                                                                                 | 0.232%      | 1.359 10 <sup>-2</sup>                       | 6.808 10 <sup>-3</sup> | 3.205 10 <sup>-3</sup> | 5.431 10 <sup>-3</sup> | 2.852 10 <sup>-4</sup> | 8.163 10 <sup>-5</sup> |
| 6     | US           | Transportation services via pipelines                                                                                 | 0.102%      | 5.985 10 <sup>-3</sup>                       | 2.997 10 <sup>-3</sup> | 1.411 10 <sup>-3</sup> | 2.391 10 <sup>-3</sup> | 1.256 10 <sup>-4</sup> | 3.593 10 <sup>-5</sup> |
| 7     | US           | Retail trade services, except of motor vehicles and motorcycles; repair services of personal and household goods (52) | 0.086%      | 5.008 10 <sup>-3</sup>                       | 2.508 10 <sup>-3</sup> | 1.181 10 <sup>-3</sup> | 2.001 10 <sup>-3</sup> | 1.051 10 <sup>-4</sup> | 3.007 10 <sup>-5</sup> |
| 8     | US           | Sub-Bituminous Coal                                                                                                   | 0.029%      | 1.690 10 <sup>-3</sup>                       | 8.462 10 <sup>-4</sup> | 3.984 10 <sup>-4</sup> | 6.751 10 <sup>-4</sup> | 3.545 10 <sup>-5</sup> | 1.015 10 <sup>-5</sup> |
| 9     | US           | Electricity by nuclear                                                                                                | 0.019%      | 1.123 10 <sup>-3</sup>                       | 5.625 10 <sup>-4</sup> | 2.648 10 <sup>-4</sup> | 4.487 10 <sup>-4</sup> | 2.357 10 <sup>-5</sup> | 6.744 10 <sup>-6</sup> |
| 10    | US           | Retail trade services of motor fuel                                                                                   | 0.018%      | 1.072 10 <sup>-3</sup>                       | 5.367 10 <sup>-4</sup> | 2.527 10 <sup>-4</sup> | 4.282 10 <sup>-4</sup> | 2.249 10 <sup>-5</sup> | 6.435 10 <sup>-6</sup> |
| 11    | US           | Air transport services (62)                                                                                           | 0.017%      | 9.984 10 <sup>-4</sup>                       | 5.000 10 <sup>-4</sup> | 2.354 10 <sup>-4</sup> | 3.989 10 <sup>-4</sup> | 2.095 10 <sup>-5</sup> | 5.995 10 <sup>-6</sup> |
| 12    | RU           | Heavy Fuel Oil                                                                                                        | 0.015%      | 8.961 10 <sup>-4</sup>                       | 4.488 10 <sup>-4</sup> | 2.113 10 <sup>-4</sup> | 3.580 10 <sup>-4</sup> | 1.880 10 <sup>-5</sup> | 5.380 10 <sup>-6</sup> |
| 13    | US           | Railway transportation services                                                                                       | 0.013%      | 7.880 10 <sup>-4</sup>                       | 3.946 10 <sup>-4</sup> | 1.858 10 <sup>-4</sup> | 3.148 10 <sup>-4</sup> | 1.653 10 <sup>-5</sup> | 4.731 10 <sup>-6</sup> |
| 14    | CN           | Electricity by coal                                                                                                   | 0.013%      | 7.538 10 <sup>-4</sup>                       | 3.775 10 <sup>-4</sup> | 1.777 10 <sup>-4</sup> | 3.012 10 <sup>-4</sup> | 1.581 10 <sup>-5</sup> | 4.526 10 <sup>-6</sup> |
| 15    | WL           | Heavy Fuel Oil                                                                                                        | 0.011%      | 6.412 10 <sup>-4</sup>                       | 3.211 10 <sup>-4</sup> | 1.512 10 <sup>-4</sup> | 2.562 10 <sup>-4</sup> | 1.345 10 <sup>-5</sup> | 3.850 10 <sup>-6</sup> |

|           |    |                                                                                   |        |                        |                        |                        |                        |                        |                        |
|-----------|----|-----------------------------------------------------------------------------------|--------|------------------------|------------------------|------------------------|------------------------|------------------------|------------------------|
| <b>16</b> | WL | Crude petroleum and services related to crude oil extraction, excluding surveying | 0.011% | 6.204 10 <sup>-4</sup> | 3.107 10 <sup>-4</sup> | 1.463 10 <sup>-4</sup> | 2.479 10 <sup>-4</sup> | 1.302 10 <sup>-5</sup> | 3.725 10 <sup>-6</sup> |
| <b>17</b> | MX | Heavy Fuel Oil                                                                    | 0.010% | 5.621 10 <sup>-4</sup> | 2.815 10 <sup>-4</sup> | 1.325 10 <sup>-4</sup> | 2.246 10 <sup>-4</sup> | 1.179 10 <sup>-5</sup> | 3.375 10 <sup>-6</sup> |
| <b>18</b> | RU | Steam and hot water supply services                                               | 0.009% | 5.216 10 <sup>-4</sup> | 2.612 10 <sup>-4</sup> | 1.230 10 <sup>-4</sup> | 2.084 10 <sup>-4</sup> | 1.094 10 <sup>-5</sup> | 3.132 10 <sup>-6</sup> |
| <b>19</b> | WL | Petroleum Coke                                                                    | 0.009% | 4.984 10 <sup>-4</sup> | 2.496 10 <sup>-4</sup> | 1.175 10 <sup>-4</sup> | 1.991 10 <sup>-4</sup> | 1.046 10 <sup>-5</sup> | 2.992 10 <sup>-6</sup> |
| <b>20</b> | US | Steam and hot water supply services                                               | 0.008% | 4.905 10 <sup>-4</sup> | 2.457 10 <sup>-4</sup> | 1.157 10 <sup>-4</sup> | 1.960 10 <sup>-4</sup> | 1.029 10 <sup>-5</sup> | 2.945 10 <sup>-6</sup> |

g) India

*Table 42: Carbon Footprint Distribution of Bitcoin mining energy consumption in India per transaction by country*

| Order     | Country Code | P.A.D.* (%) | GWP per transaction per year (kgCO2-equiv.) |           |            |
|-----------|--------------|-------------|---------------------------------------------|-----------|------------|
|           |              |             | 2018                                        | 2017      | 2016       |
| <b>1</b>  | IN           | 99.739%     | 13.184345                                   | 42.268191 | 241.964893 |
| <b>2</b>  | CN           | 0.073%      | 0.009612                                    | 0.030816  | 0.176407   |
| <b>3</b>  | ID           | 0.061%      | 0.008095                                    | 0.025952  | 0.148564   |
| <b>4</b>  | US           | 0.020%      | 0.002684                                    | 0.008605  | 0.049259   |
| <b>5</b>  | WM           | 0.018%      | 0.002415                                    | 0.007741  | 0.044312   |
| <b>6</b>  | WA           | 0.014%      | 0.001793                                    | 0.005749  | 0.032910   |
| <b>7</b>  | AU           | 0.012%      | 0.001584                                    | 0.005080  | 0.029078   |
| <b>8</b>  | RU           | 0.011%      | 0.001395                                    | 0.004472  | 0.025603   |
| <b>9</b>  | ZA           | 0.010%      | 0.001262                                    | 0.004045  | 0.023154   |
| <b>10</b> | KR           | 0.009%      | 0.001162                                    | 0.003726  | 0.021329   |

Table 43: Carbon Footprint Distribution of Bitcoin mining energy consumption in India per transaction by sector in Supply Chain

| Order | Country Code | Sector                                                              | P.A.D* (%) | GWP per transaction per year (kgCO2-equiv.) |            |           |
|-------|--------------|---------------------------------------------------------------------|------------|---------------------------------------------|------------|-----------|
|       |              |                                                                     |            | 2018                                        | 2017       | 2016      |
| 1     | IN           | Electricity by coal                                                 | 94.832%    | 230.061748                                  | 40.1888626 | 12.535759 |
| 2     | IN           | Electricity by gas                                                  | 3.627%     | 8.799549                                    | 1.5371693  | 0.479476  |
| 3     | IN           | Electricity by biomass and waste                                    | 0.539%     | 1.308463                                    | 0.2285719  | 0.071296  |
| 4     | IN           | Other Bituminous Coal                                               | 0.460%     | 1.116126                                    | 0.1949730  | 0.060816  |
| 5     | IN           | Coking Coal                                                         | 0.069%     | 0.167356                                    | 0.0292349  | 0.009119  |
| 6     | ID           | Sub-Bituminous Coal                                                 | 0.054%     | 0.130555                                    | 0.0228062  | 0.007114  |
| 7     | IN           | Electricity by petroleum and other oil derivatives                  | 0.042%     | 0.101649                                    | 0.0177567  | 0.005539  |
| 8     | CN           | Electricity by coal                                                 | 0.038%     | 0.091587                                    | 0.0159991  | 0.004990  |
| 9     | IN           | Other land transportation services                                  | 0.029%     | 0.069684                                    | 0.0121729  | 0.003797  |
| 10    | IN           | Basic iron and steel and of ferro-alloys and first products thereof | 0.016%     | 0.039732                                    | 0.0069406  | 0.002165  |
| 11    | IN           | Railway transportation services                                     | 0.016%     | 0.038604                                    | 0.0067436  | 0.002103  |
| 12    | IN           | Electricity by hydro                                                | 0.011%     | 0.027326                                    | 0.0047734  | 0.001489  |
| 13    | IN           | Furniture; other manufactured goods n.e.c. (36)                     | 0.011%     | 0.027019                                    | 0.0047198  | 0.001472  |
| 14    | CN           | Basic iron and steel and of ferro-alloys and first products thereof | 0.010%     | 0.025426                                    | 0.0044415  | 0.001385  |
| 15    | IN           | Rubber and plastic products (25)                                    | 0.008%     | 0.020047                                    | 0.0035020  | 0.001092  |
| 16    | US           | Other Bituminous Coal                                               | 0.007%     | 0.017379                                    | 0.0030358  | 0.000947  |



|           |    |                                                                          |        |          |           |          |
|-----------|----|--------------------------------------------------------------------------|--------|----------|-----------|----------|
| <b>17</b> | IN | Supporting and auxiliary transport services; travel agency services (63) | 0.007% | 0.016729 | 0.0029222 | 0.000912 |
| <b>18</b> | IN | Gas/Diesel Oil                                                           | 0.007% | 0.016005 | 0.0027958 | 0.000872 |
| <b>19</b> | AU | Coking Coal                                                              | 0.007% | 0.015866 | 0.0027715 | 0.000864 |
| <b>20</b> | ID | Other Bituminous Coal                                                    | 0.006% | 0.015102 | 0.0026382 | 0.000823 |

*Table 44: Total Annual Carbon Footprint Distribution of Bitcoin mining energy consumption in India by country*

| Order     | Country Code | P.A.D.* (%) | Total GWP per year (MtCO <sub>2</sub> -eqv.) |                        |                        |
|-----------|--------------|-------------|----------------------------------------------|------------------------|------------------------|
|           |              |             | 2018                                         | 2017                   | 2016                   |
| <b>1</b>  | IN           | 99.739%     | 1.370 10 <sup>-2</sup>                       | 1.107 10 <sup>-1</sup> | 5.515 10 <sup>-2</sup> |
| <b>2</b>  | CN           | 0.073%      | 9.985 10 <sup>-6</sup>                       | 8.070 10 <sup>-5</sup> | 4.021 10 <sup>-5</sup> |
| <b>3</b>  | ID           | 0.061%      | 8.409 10 <sup>-6</sup>                       | 6.796 10 <sup>-5</sup> | 3.386 10 <sup>-5</sup> |
| <b>4</b>  | US           | 0.020%      | 2.788 10 <sup>-6</sup>                       | 2.253 10 <sup>-5</sup> | 1.123 10 <sup>-5</sup> |
| <b>5</b>  | WM           | 0.018%      | 2.508 10 <sup>-6</sup>                       | 2.027 10 <sup>-5</sup> | 1.010 10 <sup>-5</sup> |
| <b>6</b>  | WA           | 0.014%      | 1.863 10 <sup>-6</sup>                       | 1.505 10 <sup>-5</sup> | 7.502 10 <sup>-6</sup> |
| <b>7</b>  | AU           | 0.012%      | 1.646 10 <sup>-6</sup>                       | 1.330 10 <sup>-5</sup> | 6.628 10 <sup>-6</sup> |
| <b>8</b>  | RU           | 0.011%      | 1.449 10 <sup>-6</sup>                       | 1.171 10 <sup>-5</sup> | 5.836 10 <sup>-6</sup> |
| <b>9</b>  | ZA           | 0.010%      | 1.311 10 <sup>-6</sup>                       | 1.059 10 <sup>-5</sup> | 5.278 10 <sup>-6</sup> |
| <b>10</b> | KR           | 0.009%      | 1.207 10 <sup>-6</sup>                       | 9.757 10 <sup>-6</sup> | 4.862 10 <sup>-6</sup> |

Table 45: Total Annual Carbon Footprint Distribution of Bitcoin mining energy consumption in India by sector

| Order | Country Code | Sector                                                              | P.A.D.* | Total GWP per year (MtCO <sub>2</sub> -eqv.) |                        |                        |
|-------|--------------|---------------------------------------------------------------------|---------|----------------------------------------------|------------------------|------------------------|
|       |              |                                                                     |         | 2018                                         | 2017                   | 2016                   |
| 1     | IN           | Electricity by coal                                                 | 94.832% | 5.244 10 <sup>-2</sup>                       | 1.052 10 <sup>-1</sup> | 1.302 10 <sup>-2</sup> |
| 2     | IN           | Electricity by gas                                                  | 3.627%  | 2.006 10 <sup>-3</sup>                       | 4.025 10 <sup>-3</sup> | 4.981 10 <sup>-4</sup> |
| 3     | IN           | Electricity by biomass and waste                                    | 0.539%  | 2.983 10 <sup>-4</sup>                       | 5.986 10 <sup>-4</sup> | 7.407 10 <sup>-5</sup> |
| 4     | IN           | Other Bituminous Coal                                               | 0.460%  | 2.544 10 <sup>-4</sup>                       | 5.106 10 <sup>-4</sup> | 6.318 10 <sup>-5</sup> |
| 5     | IN           | Coking Coal                                                         | 0.069%  | 3.815 10 <sup>-5</sup>                       | 7.656 10 <sup>-5</sup> | 9.473 10 <sup>-6</sup> |
| 6     | ID           | Sub-Bituminous Coal                                                 | 0.054%  | 2.976 10 <sup>-5</sup>                       | 5.972 10 <sup>-5</sup> | 7.390 10 <sup>-6</sup> |
| 7     | IN           | Electricity by petroleum and other oil derivatives                  | 0.042%  | 2.317 10 <sup>-5</sup>                       | 4.650 10 <sup>-5</sup> | 5.754 10 <sup>-6</sup> |
| 8     | CN           | Electricity by coal                                                 | 0.038%  | 2.088 10 <sup>-5</sup>                       | 4.190 10 <sup>-5</sup> | 5.184 10 <sup>-6</sup> |
| 9     | IN           | Other land transportation services                                  | 0.029%  | 1.588 10 <sup>-5</sup>                       | 3.188 10 <sup>-5</sup> | 3.944 10 <sup>-6</sup> |
| 10    | IN           | Basic iron and steel and of ferro-alloys and first products thereof | 0.016%  | 9.057 10 <sup>-6</sup>                       | 1.818 10 <sup>-5</sup> | 2.249 10 <sup>-6</sup> |
| 11    | IN           | Railway transportation services                                     | 0.016%  | 8.799 10 <sup>-6</sup>                       | 1.766 10 <sup>-5</sup> | 2.185 10 <sup>-6</sup> |
| 12    | IN           | Electricity by hydro                                                | 0.011%  | 6.229 10 <sup>-6</sup>                       | 1.250 10 <sup>-5</sup> | 1.547 10 <sup>-6</sup> |
| 13    | IN           | Furniture; other manufactured goods n.e.c. (36)                     | 0.011%  | 6.159 10 <sup>-6</sup>                       | 1.236 10 <sup>-5</sup> | 1.529 10 <sup>-6</sup> |
| 14    | CN           | Basic iron and steel and of ferro-alloys and first products thereof | 0.010%  | 5.796 10 <sup>-6</sup>                       | 1.163 10 <sup>-5</sup> | 1.439 10 <sup>-6</sup> |
| 15    | IN           | Rubber and plastic products (25)                                    | 0.008%  | 4.570 10 <sup>-6</sup>                       | 9.171 10 <sup>-6</sup> | 1.135 10 <sup>-6</sup> |

|           |    |                                                                          |        |                        |                        |                        |
|-----------|----|--------------------------------------------------------------------------|--------|------------------------|------------------------|------------------------|
| <b>16</b> | US | Other Bituminous Coal                                                    | 0.007% | 3.961 10 <sup>-6</sup> | 7.950 10 <sup>-6</sup> | 9.837 10 <sup>-7</sup> |
| <b>17</b> | IN | Supporting and auxiliary transport services; travel agency services (63) | 0.007% | 3.813 10 <sup>-6</sup> | 7.653 10 <sup>-6</sup> | 9.469 10 <sup>-7</sup> |
| <b>18</b> | IN | Gas/Diesel Oil                                                           | 0.007% | 3.648 10 <sup>-6</sup> | 7.321 10 <sup>-6</sup> | 9.060 10 <sup>-7</sup> |
| <b>19</b> | AU | Coking Coal                                                              | 0.007% | 3.616 10 <sup>-6</sup> | 7.258 10 <sup>-6</sup> | 8.981 10 <sup>-7</sup> |
| <b>20</b> | ID | Other Bituminous Coal                                                    | 0.006% | 3.443 10 <sup>-6</sup> | 6.909 10 <sup>-6</sup> | 8.549 10 <sup>-7</sup> |

#### h) Sweden

*Table 46: Carbon Footprint Distribution of Bitcoin mining energy consumption in Sweden per transaction by country*

| Order     | Country Code | P.A.D.* (%) | GWP per transaction per year (kgCO <sub>2</sub> -eqv.) |             |
|-----------|--------------|-------------|--------------------------------------------------------|-------------|
|           |              |             | 2017                                                   | 2016        |
| <b>1</b>  | SE           | 45%         | 0.376321457                                            | 0.117382643 |
| <b>2</b>  | RU           | 6%          | 0.052933418                                            | 0.016511056 |
| <b>3</b>  | WM           | 6%          | 0.048119902                                            | 0.015009618 |
| <b>4</b>  | CN           | 5%          | 0.04158796                                             | 0.012972167 |
| <b>5</b>  | WA           | 5%          | 0.04106802                                             | 0.012809986 |
| <b>6</b>  | DE           | 3%          | 0.027536192                                            | 0.008589122 |
| <b>7</b>  | US           | 3%          | 0.023165755                                            | 0.00722589  |
| <b>8</b>  | FI           | 2%          | 0.014892919                                            | 0.004645417 |
| <b>9</b>  | NL           | 2%          | 0.013234116                                            | 0.004128001 |
| <b>10</b> | GB           | 2%          | 0.013154834                                            | 0.004103272 |

Table 47: Carbon Footprint Distribution of Bitcoin mining energy consumption in Sweden per transaction by sector in Supply Chain

| Order | Country Code | Sector                                                                                                                | P.A.D.* (%) | Total GWP per year (MtCO <sub>2</sub> -eqv.) |          |
|-------|--------------|-----------------------------------------------------------------------------------------------------------------------|-------------|----------------------------------------------|----------|
|       |              |                                                                                                                       |             | 2017                                         | 2016     |
| 1     | SE           | Electricity by hydro                                                                                                  | 10.594%     | 0.3763214                                    | 0.027459 |
| 2     | SE           | Electricity by nuclear                                                                                                | 10.406%     | 0.0529334                                    | 0.026973 |
| 3     | SE           | Electricity by solar thermal                                                                                          | 7.328%      | 0.0481199                                    | 0.018994 |
| 4     | SE           | Wholesale trade and commission trade services, except of motor vehicles and motorcycles (51)                          | 2.058%      | 0.041587                                     | 0.005334 |
| 5     | CN           | Electricity by coal                                                                                                   | 2.045%      | 0.041068                                     | 0.005300 |
| 6     | SE           | Sea and coastal water transportation services                                                                         | 2.038%      | 0.0275361                                    | 0.005282 |
| 7     | RU           | Heavy Fuel Oil                                                                                                        | 1.444%      | 0.0231657                                    | 0.003742 |
| 8     | WA           | Sea and coastal water transportation services                                                                         | 1.292%      | 0.0148929                                    | 0.003349 |
| 9     | SE           | Retail trade services, except of motor vehicles and motorcycles; repair services of personal and household goods (52) | 1.158%      | 0.0132341                                    | 0.003001 |
| 10    | SE           | Supporting and auxiliary transport services; travel agency services (63)                                              | 1.104%      | 0.0131548                                    | 0.002861 |
| 11    | SE           | Other land transportation services                                                                                    | 1.083%      | 0.0124654                                    | 0.002808 |
| 12    | RU           | Steam and hot water supply services                                                                                   | 1.046%      | 0.0118584                                    | 0.002710 |
| 13    | WM           | Sea and coastal water transportation services                                                                         | 1.006%      | 0.0112138                                    | 0.002608 |
| 14    | SE           | Pulp                                                                                                                  | 0.977%      | 0.0110292                                    | 0.002533 |
| 15    | SE           | Electricity by wind                                                                                                   | 0.892%      | 0.0094867                                    | 0.002312 |

|           |    |                                                                     |        |           |          |
|-----------|----|---------------------------------------------------------------------|--------|-----------|----------|
| <b>16</b> | LV | Products of forestry, logging and related services (02)             | 0.849% | 0.0094850 | 0.002200 |
| <b>17</b> | SE | Products of forestry, logging and related services (02)             | 0.795% | 0.0091078 | 0.002062 |
| <b>18</b> | CN | Basic iron and steel and of ferro-alloys and first products thereof | 0.750% | 0.0079432 | 0.001944 |
| <b>19</b> | WM | Rubber and plastic products (25)                                    | 0.709% | 0.0075450 | 0.001836 |
| <b>20</b> | DE | Sea and coastal water transportation services                       | 0.688% | 0.0067209 | 0.001783 |

*Table 48: Total Annual Carbon Footprint Distribution of Bitcoin mining energy consumption in Sweden by country*

| <b>Order</b> | <b>Country Code</b> | <b>P.A.D.* (%)</b> | <b>Total GWP per year (MtCO<sub>2</sub>-eqv.)</b> |                        |
|--------------|---------------------|--------------------|---------------------------------------------------|------------------------|
|              |                     |                    | 2017                                              | 2016                   |
| <b>1</b>     | SE                  | 45%                | 7.822 10 <sup>-5</sup>                            | 3.820 10 <sup>-5</sup> |
| <b>2</b>     | RU                  | 6%                 | 1.100 10 <sup>-5</sup>                            | 5.374 10 <sup>-6</sup> |
| <b>3</b>     | WM                  | 6%                 | 1.000 10 <sup>-5</sup>                            | 4.885 10 <sup>-6</sup> |
| <b>4</b>     | CN                  | 5%                 | 8.644 10 <sup>-6</sup>                            | 4.222 10 <sup>-6</sup> |
| <b>5</b>     | WA                  | 5%                 | 8.536 10 <sup>-6</sup>                            | 4.169 10 <sup>-6</sup> |
| <b>6</b>     | DE                  | 3%                 | 5.723 10 <sup>-6</sup>                            | 2.795 10 <sup>-6</sup> |
| <b>7</b>     | US                  | 3%                 | 4.815 10 <sup>-6</sup>                            | 2.352 10 <sup>-6</sup> |
| <b>8</b>     | FI                  | 2%                 | 3.095 10 <sup>-6</sup>                            | 1.512 10 <sup>-6</sup> |
| <b>9</b>     | NL                  | 2%                 | 2.751 10 <sup>-6</sup>                            | 1.344 10 <sup>-6</sup> |
| <b>10</b>    | GB                  | 2%                 | 2.734 10 <sup>-6</sup>                            | 1.335 10 <sup>-6</sup> |

*Table 49: Total Annual Carbon Footprint Distribution of Bitcoin mining energy consumption in Sweden by sector*

| <b>Order</b> | <b>Country Code</b> | <b>Sector</b> | <b>P.A.D.*</b> | <b>Total GWP per year (MtCO<sub>2</sub>-eqv.)</b> |
|--------------|---------------------|---------------|----------------|---------------------------------------------------|
|--------------|---------------------|---------------|----------------|---------------------------------------------------|

|           |    |                                                                                                                       |         | 2017                  | 2016                  |
|-----------|----|-----------------------------------------------------------------------------------------------------------------------|---------|-----------------------|-----------------------|
| <b>1</b>  | SE | Electricity by hydro                                                                                                  | 10.594% | $9.413 \cdot 10^{-5}$ | $8.937 \cdot 10^{-6}$ |
| <b>2</b>  | SE | Electricity by nuclear                                                                                                | 10.406% | $1.324 \cdot 10^{-5}$ | $8.779 \cdot 10^{-6}$ |
| <b>3</b>  | SE | Electricity by solar thermal                                                                                          | 7.328%  | $1.204 \cdot 10^{-5}$ | $6.182 \cdot 10^{-6}$ |
| <b>4</b>  | SE | Wholesale trade and commission trade services, except of motor vehicles and motorcycles (51)                          | 2.058%  | $1.040 \cdot 10^{-5}$ | $1.736 \cdot 10^{-6}$ |
| <b>5</b>  | CN | Electricity by coal                                                                                                   | 2.045%  | $1.027 \cdot 10^{-5}$ | $1.725 \cdot 10^{-6}$ |
| <b>6</b>  | SE | Sea and coastal water transportation services                                                                         | 2.038%  | $6.888 \cdot 10^{-6}$ | $1.719 \cdot 10^{-6}$ |
| <b>7</b>  | RU | Heavy Fuel Oil                                                                                                        | 1.444%  | $5.794 \cdot 10^{-6}$ | $1.218 \cdot 10^{-6}$ |
| <b>8</b>  | WA | Sea and coastal water transportation services                                                                         | 1.292%  | $3.725 \cdot 10^{-6}$ | $1.090 \cdot 10^{-6}$ |
| <b>9</b>  | SE | Retail trade services, except of motor vehicles and motorcycles; repair services of personal and household goods (52) | 1.158%  | $3.310 \cdot 10^{-6}$ | $9.767 \cdot 10^{-7}$ |
| <b>10</b> | SE | Supporting and auxiliary transport services; travel agency services (63)                                              | 1.104%  | $3.290 \cdot 10^{-6}$ | $9.313 \cdot 10^{-7}$ |
| <b>11</b> | SE | Other land transportation services                                                                                    | 1.083%  | $3.118 \cdot 10^{-6}$ | $9.140 \cdot 10^{-7}$ |
| <b>12</b> | RU | Steam and hot water supply services                                                                                   | 1.046%  | $2.966 \cdot 10^{-6}$ | $8.821 \cdot 10^{-7}$ |
| <b>13</b> | WM | Sea and coastal water transportation services                                                                         | 1.006%  | $2.805 \cdot 10^{-6}$ | $8.489 \cdot 10^{-7}$ |
| <b>14</b> | SE | Pulp                                                                                                                  | 0.977%  | $2.759 \cdot 10^{-6}$ | $8.243 \cdot 10^{-7}$ |
| <b>15</b> | SE | Electricity by wind                                                                                                   | 0.892%  | $2.373 \cdot 10^{-6}$ | $7.526 \cdot 10^{-7}$ |
| <b>16</b> | LV | Products of forestry, logging and related services (02)                                                               | 0.849%  | $2.372 \cdot 10^{-6}$ | $7.161 \cdot 10^{-7}$ |
| <b>17</b> | SE | Products of forestry, logging and related services (02)                                                               | 0.795%  | $2.278 \cdot 10^{-6}$ | $6.710 \cdot 10^{-7}$ |
| <b>18</b> | CN | Basic iron and steel and of ferro-alloys and first products thereof                                                   | 0.750%  | $1.987 \cdot 10^{-6}$ | $6.326 \cdot 10^{-7}$ |

|           |    |                                               |        |                       |                       |
|-----------|----|-----------------------------------------------|--------|-----------------------|-----------------------|
| <b>19</b> | WM | Rubber and plastic products (25)              | 0.709% | $1.887 \cdot 10^{-6}$ | $5.977 \cdot 10^{-7}$ |
| <b>20</b> | DE | Sea and coastal water transportation services | 0.688% | $1.681 \cdot 10^{-6}$ | $5.802 \cdot 10^{-7}$ |

## 4.5. Carbon Footprint of Bitcoin Mining by country

### 4.5.1. Method

After calculating the carbon footprint of equipment (section 4.3) needed for mining Bitcoin and analyzing the carbon footprint of electricity needed for mining Bitcoin by country (section 4.4). In this section we will analyze the total carbon footprint of Bitcoin mining. Furthermore, the GWP per transaction per year and Total Annual Carbon Footprint Distribution of Bitcoin mining was calculated using the same methodology described in the previous section.

### 4.5.2. Results

#### i) Total Carbon footprint of Bitcoin Mining

Table 50: GWP of Bitcoin Mining per transaction by country by year in kgCO<sub>2</sub>-eqv.

| Countries      | GWP per transaction per year (kgCO <sub>2</sub> -eqv.) |        |        |         |         |         |
|----------------|--------------------------------------------------------|--------|--------|---------|---------|---------|
|                | 2015                                                   | 2016   | 2017   | 2018    | 2019    | 2020    |
| China          | 5.453                                                  | 13.255 | 42.541 | 248.396 | 294.443 | 459.279 |
| U.S.           | 4.424                                                  | 10.723 | 34.408 | 201.932 | 239.676 | 375.849 |
| Unknown server | 3.340                                                  | 8.054  | 25.635 | 152.946 | 181.936 | 287.888 |
| Finland        | 2.761                                                  | 6.630  | 21.301 | 126.804 | 151.134 | 240.949 |
| Georgia        | 0.954                                                  | 2.182  | 7.043  | 45.185  | 54.929  | 94.395  |
| Iceland        | 0.553                                                  | 1.197  | 3.883  | 27.097  | 33.608  | 53.348  |
| India          | 0.000                                                  | 14.156 | 45.429 | 264.924 | 0.000   | 0.000   |
| Sweden         | 0.000                                                  | 1.196  | 3.881  | 0.000   | 0.000   | 0.000   |

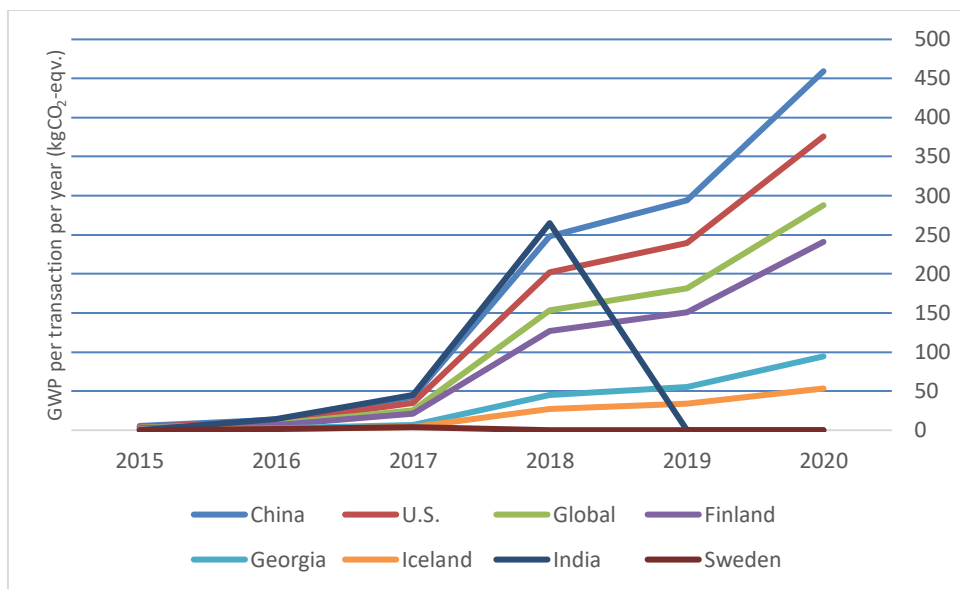

Figure 7: GWP of Bitcoin Mining per transaction by country by year in kgCO<sub>2</sub>-eqv

Table 51: Total Annual GHG emission of Bitcoin mining per by country by country by year

| Countries      | Total GWP per year (MtCO <sub>2</sub> -eqv.) |        |        |         |         |         |
|----------------|----------------------------------------------|--------|--------|---------|---------|---------|
|                | 2015                                         | 2016   | 2017   | 2018    | 2019    | 2020    |
| China          | 0.1477                                       | 0.6983 | 3.1682 | 14.2531 | 25.1848 | 39.2586 |
| U.S.           | 0.0391                                       | 0.1344 | 0.3369 | 1.5504  | 3.3159  | 5.8484  |
| Unknown server | 0.0102                                       | 0.0585 | 0.2418 | 2.1682  | 2.6036  | 2.3078  |
| Finland        | 0.0057                                       | 0.0178 | 0.0418 | 0.0937  | 0.3192  | 0.0741  |
| Georgia        | 0.0020                                       | 0.0059 | 0.0138 | 0.0334  | 0.1160  | 0.0290  |
| Iceland        | 0.0011                                       | 0.0032 | 0.0076 | 0.0200  | 0.0710  | 0.0164  |
| India          | 0.0000                                       | 0.0147 | 0.1190 | 0.0604  | 0.0000  | 0.0000  |
| Sweden         | 0.0000                                       | 0.0004 | 0.0008 | 0.0000  | 0.0000  | 0.0000  |
| Total          | 0.2058                                       | 0.9332 | 3.9299 | 18.1792 | 31.6105 | 47.5343 |



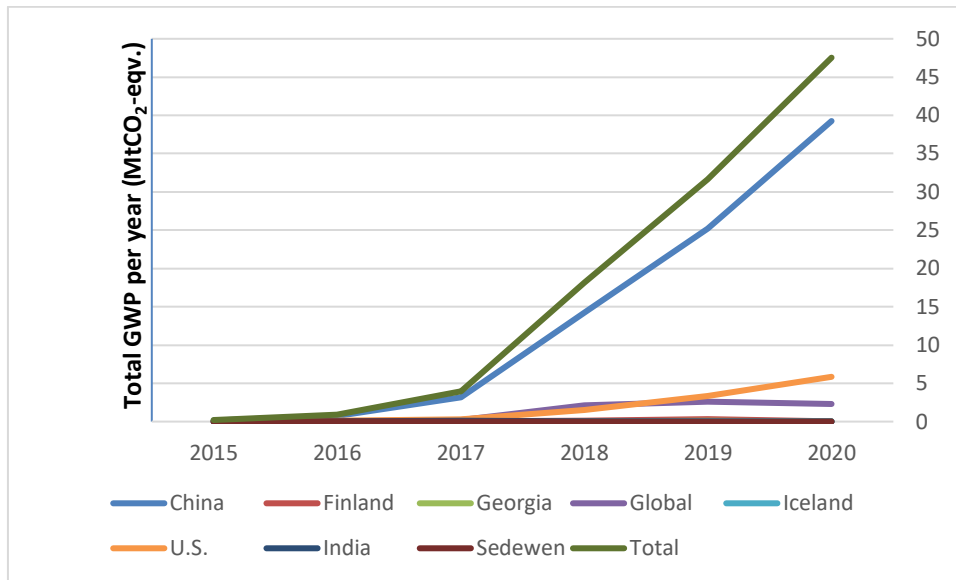

Figure 8: Total Gas emissions emission by country by year

a) China

Table 52: Abbreviation of sectors

| Sector                                                                                                                | Abbreviation               |
|-----------------------------------------------------------------------------------------------------------------------|----------------------------|
| Electricity by coal                                                                                                   | Elec. Coal                 |
| Electricity by gas                                                                                                    | Elec. Gas                  |
| Basic iron and steel and of ferro-alloys and first products thereof                                                   | Iron and Steel             |
| Other Bituminous Coal                                                                                                 | Bituminous Coal            |
| Steam and hot water supply services                                                                                   | Steam-Hot W. Sply.         |
| Rubber and plastic products (25)                                                                                      | Rubber and plastic         |
| Office machinery and computers (30)                                                                                   | O. Machinery and Computers |
| Chemicals nec                                                                                                         | Chemicals nec              |
| Air transport services (62)                                                                                           | Air transport services     |
| Other non-metallic mineral products                                                                                   | Other mineral products     |
| Supporting and auxiliary transport services; travel agency services (63)                                              | Supporting transport       |
| Coke Oven Coke                                                                                                        | Coke Oven                  |
| Chemicals nec                                                                                                         | Chemicals nec              |
| Inland water transportation services                                                                                  | Inland transportation      |
| Sea and coastal water transportation services                                                                         | Sea transportation         |
| Other business services (74)                                                                                          | Other business services    |
| Railway transportation services                                                                                       | Railway transportation     |
| Paper and paper products                                                                                              | paper products             |
| Other land transportation services                                                                                    | land transportation        |
| Crude petroleum and services related to crude oil extraction, excluding surveying                                     | Crude petroleum            |
| Electricity by petroleum and other oil derivatives                                                                    | Elec. Petroleum            |
| Wholesale trade and commission trade services, except of motor vehicles and motorcycles (51)                          | Wholesale trade            |
| Retail trade services. except of motor vehicles and motorcycles; repair services of personal and household goods (52) | Retail trade               |
| Bottles for treatment, Recycling of bottles by direct reuse                                                           | Bottles for treatment      |
| Distribution services of gaseous fuels through mains                                                                  | Dist. of gaseous fuels     |
| Re-processing of ash into clinker Natural gas and services related to natural gas extraction. excluding surveying     | Re-processing of ash       |
| Natural gas and services related to natural gas extraction. excluding surveying abbreviation                          | Natural Gas Services       |

Table 53: Carbon Footprint Distribution of Bitcoin mining in China per transaction by country

| Order | GWP per transaction per year (kgCO <sub>2</sub> -eqv.) |             |         |      |             |         |      |             |         |      |             |                       |      |             |                       |      |             |                       |
|-------|--------------------------------------------------------|-------------|---------|------|-------------|---------|------|-------------|---------|------|-------------|-----------------------|------|-------------|-----------------------|------|-------------|-----------------------|
|       | 2020                                                   |             |         | 2019 |             |         | 2018 |             |         | 2017 |             |                       | 2016 |             |                       | 2015 |             |                       |
|       | C.C.                                                   | P.A.D.* (%) | GWP     | C.C. | P.A.D.* (%) | GWP     | C.C. | P.A.D.* (%) | GWP     | C.C. | P.A.D.* (%) | GWP                   | C.C. | P.A.D.* (%) | GWP                   | C.C. | P.A.D.* (%) | GWP                   |
| 1     | CN                                                     | 98.35%      | 451.676 | CN   | 98.54%      | 290.130 | CN   | 98.58%      | 244.872 | CN   | 98.75%      | 42.007                | CN   | 90.38%      | 8.58 10 <sup>-1</sup> | CN   | 98.65%      | 5.379                 |
| 2     | WA                                                     | 0.24%       | 1.100   | WA   | 0.21%       | 0.627   | WA   | 0.21%       | 0.513   | WA   | 0.18%       | 7.81 10 <sup>-2</sup> | JP   | 1.45%       | 1.74 10 <sup>-1</sup> | WA   | 0.20%       | 1.07 10 <sup>-2</sup> |
| 3     | JP                                                     | 0.20%       | 0.923   | US   | 0.18%       | 0.533   | US   | 0.18%       | 0.437   | US   | 0.16%       | 6.76 10 <sup>-2</sup> | WA   | 1.35%       | 2.58 10 <sup>-2</sup> | US   | 0.17%       | 9.20 10 <sup>-3</sup> |
| 4     | US                                                     | 0.20%       | 0.922   | JP   | 0.17%       | 0.504   | JP   | 0.16%       | 0.407   | JP   | 0.14%       | 5.88 10 <sup>-2</sup> | KR   | 1.12%       | 2.12 10 <sup>-2</sup> | JP   | 0.15%       | 8.33 10 <sup>-3</sup> |
| 5     | KR                                                     | 0.16%       | 0.745   | KR   | 0.14%       | 0.410   | KR   | 0.13%       | 0.332   | KR   | 0.11%       | 4.86 10 <sup>-2</sup> | US   | 1.03%       | 1.76 10 <sup>-2</sup> | KR   | 0.13%       | 6.84 10 <sup>-3</sup> |
| 6     | WM                                                     | 0.16%       | 0.715   | WM   | 0.14%       | 0.398   | WM   | 0.13%       | 0.323   | WM   | 0.11%       | 4.78 10 <sup>-2</sup> | WM   | 1.02%       | 1.44 10 <sup>-2</sup> | WM   | 0.12%       | 6.68 10 <sup>-3</sup> |
| 7     | RU                                                     | 0.13%       | 0.578   | RU   | 0.12%       | 0.345   | RU   | 0.12%       | 0.285   | RU   | 0.11%       | 4.57 10 <sup>-2</sup> | DE   | 0.68%       | 1.43 10 <sup>-2</sup> | RU   | 0.11%       | 6.09 10 <sup>-3</sup> |
| 8     | DE                                                     | 0.11%       | 0.489   | DE   | 0.09%       | 0.273   | DE   | 0.09%       | 0.222   | DE   | 0.08%       | 3.30 10 <sup>-2</sup> | RU   | 0.49%       | 1.21 10 <sup>-2</sup> | DE   | 0.08%       | 4.60 10 <sup>-3</sup> |
| 9     | ID                                                     | 0.06%       | 0.272   | ID   | 0.06%       | 0.162   | ID   | 0.05%       | 0.134   | ID   | 0.05%       | 2.13 10 <sup>-2</sup> | IN   | 0.31%       | 9.31 10 <sup>-3</sup> | ID   | 0.05%       | 2.84 10 <sup>-3</sup> |
| 10    | IN                                                     | 0.05%       | 0.229   | IN   | 0.04%       | 0.129   | IN   | 0.04%       | 0.105   | WL   | 0.04%       | 1.63 10 <sup>-2</sup> | ID   | 0.25%       | 5.31 10 <sup>-3</sup> | WL   | 0.04%       | 2.20 10 <sup>-3</sup> |

Table 54: Carbon Footprint Distribution of Bitcoin mining in China per transaction by sector in Supply Chain

| O. | GWP per transaction per year (kgCO <sub>2</sub> -eqv.) |                            |             |         |      |                            |             |         |      |                            |             |         |      |                            |             |                       |      |                            |             |                       |      |                            |             |                      |
|----|--------------------------------------------------------|----------------------------|-------------|---------|------|----------------------------|-------------|---------|------|----------------------------|-------------|---------|------|----------------------------|-------------|-----------------------|------|----------------------------|-------------|-----------------------|------|----------------------------|-------------|----------------------|
|    | 2020                                                   |                            |             |         | 2019 |                            |             |         | 2018 |                            |             |         | 2017 |                            |             |                       | 2016 |                            |             |                       | 2015 |                            |             |                      |
|    | C.C.                                                   | Sector                     | P.A.D.* (%) | GWP     | C.C. | Sector                     | P.A.D.* (%) | GWP     | C.C. | Sector                     | P.A.D.* (%) | GWP     | C.C. | Sector                     | P.A.D.* (%) | GWP                   | C.C. | Sector                     | P.A.D.* (%) | GWP                   | C.C. | Sector                     | P.A.D.* (%) | GWP                  |
| 1  | CN                                                     | Elec. Coal                 | 90.19%      | 414.226 | CN   | Elec. Coal                 | 91.10%      | 268.279 | CN   | Elec. Coal                 | 91.34%      | 226.879 | CN   | Elec. Coal                 | 92.13%      | 39.194                | CN   | Elec. Coal                 | 92.18%      | 12.218                | CN   | Elec. Coal                 | 91.68%      | 4.999                |
| 2  | CN                                                     | Elec. Gas                  | 1.73%       | 7.931   | CN   | Elec. Gas                  | 1.75%       | 5.156   | CN   | Elec. Gas                  | 1.76%       | 4.365   | CN   | Elec. Gas                  | 1.78%       | 7.56 10 <sup>-1</sup> | CN   | Elec. Gas                  | 1.78%       | 2.36 10 <sup>-1</sup> | CN   | Elec. Gas                  | 1.77%       | 9.6 10 <sup>-2</sup> |
| 3  | CN                                                     | Iron and Steel             | 1.68%       | 7.712   | CN   | Iron and Steel             | 1.44%       | 4.251   | CN   | Iron and Steel             | 1.39%       | 3.444   | CN   | Iron and Steel             | 1.18%       | 5.04 10 <sup>-1</sup> | CN   | Iron and Steel             | 1.17%       | 1.55 10 <sup>-1</sup> | CN   | Iron and Steel             | 1.30%       | 7.1 10 <sup>-2</sup> |
| 4  | CN                                                     | Bituminous Coal            | 1.07%       | 4.899   | CN   | Bituminous Coal            | 1.06%       | 3.126   | CN   | Bituminous Coal            | 1.06%       | 2.634   | CN   | Bituminous Coal            | 1.06%       | 4.49 10 <sup>-1</sup> | CN   | Bituminous Coal            | 1.06%       | 1.4 10 <sup>-1</sup>  | CN   | Bituminous Coal            | 1.06%       | 5.8 10 <sup>-2</sup> |
| 5  | CN                                                     | Steam-Hot W. Sply.         | 0.67%       | 3.072   | CN   | Steam-Hot W. Sply.         | 0.57%       | 1.674   | CN   | Steam-Hot W. Sply.         | 0.54%       | 1.352   | CN   | Steam-Hot W. Sply.         | 0.46%       | 1.95 10 <sup>-1</sup> | CN   | Steam-Hot W. Sply.         | 0.45%       | 6 10 <sup>-2</sup>    | CN   | Steam-Hot W. Sply.         | 0.51%       | 2.8 10 <sup>-2</sup> |
| 6  | CN                                                     | Rubber and plastic         | 0.37%       | 1.684   | CN   | Rubber and plastic         | 0.31%       | 0.907   | CN   | Rubber and plastic         | 0.29%       | 0.73    | CN   | Rubber and plastic         | 0.24%       | 1.04 10 <sup>-1</sup> | CN   | Rubber and plastic         | 0.24%       | 3.2 10 <sup>-2</sup>  | CN   | Rubber and plastic         | 0.27%       | 1.5 10 <sup>-2</sup> |
| 7  | CN                                                     | O. machinery and computers | 0.34%       | 1.543   | CN   | O. machinery and computers | 0.28%       | 0.81    | CN   | O. machinery and computers | 0.26%       | 0.647   | CN   | O. machinery and computers | 0.21%       | 8.9 10 <sup>-2</sup>  | CN   | O. machinery and computers | 0.21%       | 2.7 10 <sup>-2</sup>  | CN   | O. machinery and computers | 0.24%       | 1.3 10 <sup>-2</sup> |
| 8  | CN                                                     | Chemicals nec              | 0.26%       | 1.207   | CN   | Chemicals nec              | 0.22%       | 0.649   | CN   | Chemicals nec              | 0.21%       | 0.522   | CN   | Chemicals nec              | 0.17%       | 7.4 10 <sup>-2</sup>  | CN   | Chemicals nec              | 0.17%       | 2.3 10 <sup>-2</sup>  | CN   | Chemicals nec              | 0.20%       | 1.1 10 <sup>-2</sup> |
| 9  | CN                                                     | Air transport services     | 0.19%       | 0.858   | CN   | Other mineral products     | 0.16%       | 0.478   | CN   | Other mineral products     | 0.16%       | 0.389   | CN   | Other mineral products     | 0.14%       | 5.8 10 <sup>-2</sup>  | CN   | Other mineral products     | 0.14%       | 1.8 10 <sup>-2</sup>  | CN   | Other mineral products     | 0.15%       | 8 10 <sup>-3</sup>   |
| 10 | CN                                                     | Other mineral products     | 0.19%       | 0.851   | CN   | Air transport services     | 0.16%       | 0.471   | CN   | Air transport services     | 0.15%       | 0.381   | CN   | Air transport services     | 0.13%       | 5.5 10 <sup>-2</sup>  | CN   | Air transport services     | 0.13%       | 1.7 10 <sup>-2</sup>  | CN   | Air transport services     | 0.14%       | 8 10 <sup>-3</sup>   |
| 11 | CN                                                     | Supporting transport       | 0.12%       | 0.552   | CN   | Supporting transport       | 0.10%       | 0.305   | CN   | Supporting transport       | 0.10%       | 0.247   | CN   | Supporting transport       | 0.09%       | 3.6 10 <sup>-2</sup>  | CN   | Supporting transport       | 0.09%       | 1.1 10 <sup>-2</sup>  | CN   | Supporting transport       | 0.09%       | 5 10 <sup>-3</sup>   |
| 12 | CN                                                     | Coke Oven                  | 0.10%       | 0.444   | CN   | Coke Oven                  | 0.09%       | 0.255   | CN   | Coke Oven                  | 0.08%       | 0.209   | CN   | Coke Oven                  | 0.08%       | 3.2 10 <sup>-2</sup>  | CN   | Coke Oven                  | 0.08%       | 1 10 <sup>-2</sup>    | CN   | Coke Oven                  | 0.08%       | 4 10 <sup>-3</sup>   |
| 13 | CN                                                     | Inland transportation      | 0.09%       | 0.428   | CN   | Inland transportation      | 0.08%       | 0.236   | CN   | Inland transportation      | 0.08%       | 0.191   | CN   | Inland transportation      | 0.07%       | 2.8 10 <sup>-2</sup>  | CN   | Inland transportation      | 0.07%       | 9 10 <sup>-3</sup>    | CN   | Inland transportation      | 0.07%       | 4 10 <sup>-3</sup>   |

|    |    |                         |       |       |    |                         |       |       |    |                         |       |       |    |                         |       |                      |    |                         |       |                    |    |                         |       |                    |
|----|----|-------------------------|-------|-------|----|-------------------------|-------|-------|----|-------------------------|-------|-------|----|-------------------------|-------|----------------------|----|-------------------------|-------|--------------------|----|-------------------------|-------|--------------------|
| 14 | CN | Sea transportation      | 0.09% | 0.407 | CN | Sea transportation      | 0.08% | 0.228 | CN | Sea transportation      | 0.08% | 0.186 | CN | Sea transportation      | 0.07% | 2.8 10 <sup>-2</sup> | CN | Sea transportation      | 0.07% | 9 10 <sup>-3</sup> | CN | Sea transportation      | 0.07% | 4 10 <sup>-3</sup> |
| 15 | CN | Other business services | 0.07% | 0.341 | CN | Other business services | 0.07% | 0.193 | CN | Other business services | 0.06% | 0.158 | CN | Other business services | 0.06% | 2.4 10 <sup>-2</sup> | CN | Other business services | 0.06% | 7 10 <sup>-3</sup> | CN | Other business services | 0.06% | 3 10 <sup>-3</sup> |
| 16 | CN | Railway transportation  | 0.07% | 0.323 | CN | Railway transportation  | 0.06% | 0.18  | CN | Railway transportation  | 0.06% | 0.146 | CN | Railway transportation  | 0.05% | 2.2 10 <sup>-2</sup> | CN | Railway transportation  | 0.05% | 7 10 <sup>-3</sup> | CN | Railway transportation  | 0.06% | 3 10 <sup>-3</sup> |
| 17 | DE | Sea transportation      | 0.07% | 0.314 | DE | Sea transportation      | 0.06% | 0.173 | DE | Sea transportation      | 0.06% | 0.14  | DE | Sea transportation      | 0.05% | 2.1 10 <sup>-2</sup> | DE | Sea transportation      | 0.05% | 6 10 <sup>-3</sup> | DE | Sea transportation      | 0.05% | 3 10 <sup>-3</sup> |
| 18 | CN | Paper products          | 0.07% | 0.306 | CN | Paper products          | 0.06% | 0.167 | CN | Paper products          | 0.05% | 0.135 | CN | Crude petroleum         | 0.05% | 2 10 <sup>-2</sup>   | CN | Crude petroleum         | 0.05% | 6 10 <sup>-3</sup> | CN | Paper products          | 0.05% | 3 10 <sup>-3</sup> |
| 19 | CN | Land transportation     | 0.06% | 0.284 | CN | Crude petroleum         | 0.05% | 0.158 | CN | Crude petroleum         | 0.05% | 0.13  | CN | Paper products          | 0.05% | 2 10 <sup>-2</sup>   | CN | Paper products          | 0.05% | 6 10 <sup>-3</sup> | CN | Crude petroleum         | 0.05% | 3 10 <sup>-3</sup> |
| 20 | CN | Crude petroleum         | 0.06% | 0.276 | CN | Land transportation     | 0.05% | 0.157 | CN | Land transportation     | 0.05% | 0.127 | CN | Land transportation     | 0.04% | 1.9 10 <sup>-2</sup> | CN | Land transportation     | 0.04% | 6 10 <sup>-3</sup> | CN | Land transportation     | 0.05% | 3 10 <sup>-3</sup> |

Table 55: Total Annual Carbon Footprint Distribution of Bitcoin mining in China by country

| Order | Total GWP per year (MtCO <sub>2</sub> -eqv.) |             |        |      |             |        |      |             |       |      |             |                       |      |             |                       |      |             |                       |
|-------|----------------------------------------------|-------------|--------|------|-------------|--------|------|-------------|-------|------|-------------|-----------------------|------|-------------|-----------------------|------|-------------|-----------------------|
|       | 2020                                         |             |        | 2019 |             |        | 2018 |             |       | 2017 |             |                       | 2016 |             |                       | 2015 |             |                       |
|       | C.C.                                         | P.A.D.* (%) | GWP    | C.C. | P.A.D.* (%) | GWP    | C.C. | P.A.D.* (%) | GWP   | C.C. | P.A.D.* (%) | GWP                   | C.C. | P.A.D.* (%) | GWP                   | C.C. | P.A.D.* (%) | GWP                   |
| 1     | CN                                           | 98.35%      | 38.609 | CN   | 98.54%      | 24.816 | CN   | 98.58%      | 0.892 | CN   | 98.75%      | 3.128                 | CN   | 90.38%      | 2.31 10 <sup>-2</sup> | CN   | 98.651%     | 1.46 10 <sup>-1</sup> |
| 2     | WA                                           | 0.24%       | 0.094  | WA   | 0.21%       | 0.054  | US   | 0.21%       | 0.332 | WA   | 0.18%       | 5.81 10 <sup>-3</sup> | JP   | 1.45%       | 1.73 10 <sup>-3</sup> | WA   | 0.197%      | 2.9 10 <sup>-4</sup>  |
| 3     | JP                                           | 0.20%       | 0.079  | US   | 0.18%       | 0.046  | IN   | 0.18%       | 0.144 | US   | 0.16%       | 5.04 10 <sup>-3</sup> | WA   | 1.35%       | 1.38 10 <sup>-3</sup> | US   | 0.169%      | 2.49 10 <sup>-4</sup> |
| 4     | US                                           | 0.20%       | 0.079  | JP   | 0.17%       | 0.043  | RU   | 0.16%       | 0.063 | JP   | 0.14%       | 4.38 10 <sup>-3</sup> | KR   | 1.12%       | 1.31 10 <sup>-3</sup> | JP   | 0.153%      | 2.26 10 <sup>-4</sup> |
| 5     | KR                                           | 0.16%       | 0.064  | KR   | 0.14%       | 0.035  | JP   | 0.13%       | 0.063 | KR   | 0.11%       | 3.62 10 <sup>-3</sup> | US   | 1.03%       | 9.24 10 <sup>-3</sup> | KR   | 0.125%      | 1.85 10 <sup>-4</sup> |
| 6     | WM                                           | 0.16%       | 0.061  | WM   | 0.14%       | 0.034  | CA   | 0.13%       | 0.053 | WM   | 0.11%       | 3.56 10 <sup>-3</sup> | WM   | 1.02%       | 1.35 10 <sup>-3</sup> | WM   | 0.122%      | 1.81 10 <sup>-4</sup> |
| 7     | RU                                           | 0.13%       | 0.049  | RU   | 0.12%       | 0.029  | WA   | 0.12%       | 0.050 | RU   | 0.11%       | 3.4 10 <sup>-3</sup>  | DE   | 0.68%       | 1.05 10 <sup>-3</sup> | RU   | 0.112%      | 1.65 10 <sup>-4</sup> |
| 8     | DE                                           | 0.11%       | 0.042  | DE   | 0.09%       | 0.023  | WM   | 0.09%       | 0.049 | DE   | 0.08%       | 2.46 10 <sup>-3</sup> | RU   | 0.49%       | 1.76 10 <sup>-3</sup> | DE   | 0.084%      | 1.25 10 <sup>-4</sup> |
| 9     | ID                                           | 0.06%       | 0.023  | ID   | 0.06%       | 0.014  | KR   | 0.05%       | 0.048 | ID   | 0.05%       | 1.58 10 <sup>-3</sup> | IN   | 0.31%       | 4.0 10 <sup>-3</sup>  | ID   | 0.052%      | 7.7 10 <sup>-5</sup>  |
| 10    | IN                                           | 0.05%       | 0.020  | IN   | 0.04%       | 0.011  | WL   | 0.04%       | 0.047 | WL   | 0.04%       | 1.22 10 <sup>-3</sup> | ID   | 0.25%       | 4.32 10 <sup>-4</sup> | WL   | 0.040%      | 5.96 10 <sup>-5</sup> |

Table 56: Total Annual Carbon Footprint Distribution of Bitcoin mining in China by sector

| O. | Total GWP per year (MtCO <sub>2</sub> -eqv.) |                    |                |                          |      |                    |                |                          |      |                    |                |                          |      |                    |                |                          |      |                    |                |                          |      |                    |                |                          |
|----|----------------------------------------------|--------------------|----------------|--------------------------|------|--------------------|----------------|--------------------------|------|--------------------|----------------|--------------------------|------|--------------------|----------------|--------------------------|------|--------------------|----------------|--------------------------|------|--------------------|----------------|--------------------------|
|    | 2020                                         |                    |                |                          | 2019 |                    |                |                          | 2018 |                    |                |                          | 2017 |                    |                |                          | 2016 |                    |                |                          | 2015 |                    |                |                          |
|    | C.C.                                         | Sector             | P.A.D.*<br>(%) | GWP                      | C.C. | Sector             | P.A.D.*<br>(%) | GWP                      | C.C. | Sector             | P.A.D.*<br>(%) | GWP                      | C.C. | Sector             | P.A.D.*<br>(%) | GWP                      | C.C. | Sector             | P.A.D.*<br>(%) | GWP                      | C.C. | Sector             | P.A.D.*<br>(%) | GWP                      |
| 1  | CN                                           | Elec. Coal         | 90.19%         | 35.408                   | CN   | Elec. Coal         | 91.11%         | 22.947                   | CN   | Elec. Coal         | 91.34%         | 13.018                   | CN   | Elec. Coal         | 92.13%         | 2.919                    | CN   | Elec. Coal         | 92.18%         | 6.44<br>10 <sup>-1</sup> | CN   | Elec. Coal         | 91.68%         | 1.35<br>10 <sup>-1</sup> |
| 2  | CN                                           | Elec. Gas          | 1.73%          | 6.78<br>10 <sup>-1</sup> | CN   | Elec. Gas          | 1.75%          | 4.41<br>10 <sup>-1</sup> | CN   | Elec. Gas          | 1.76%          | 2.50<br>10 <sup>-1</sup> | CN   | Elec. Gas          | 1.78%          | 5.63<br>10 <sup>-2</sup> | CN   | Elec. Gas          | 1.78%          | 1.24<br>10 <sup>-2</sup> | CN   | Elec. Gas          | 1.77%          | 2.61<br>10 <sup>-3</sup> |
| 3  | CN                                           | Iron and Steel     | 1.68%          | 6.59<br>10 <sup>-1</sup> | CN   | Iron and Steel     | 1.44%          | 3.64<br>10 <sup>-1</sup> | CN   | Iron and Steel     | 1.39%          | 1.98<br>10 <sup>-1</sup> | CN   | Iron and Steel     | 1.18%          | 3.75<br>10 <sup>-2</sup> | CN   | Iron and Steel     | 1.17%          | 8.19<br>10 <sup>-3</sup> | CN   | Iron and Steel     | 1.30%          | 1.92<br>10 <sup>-3</sup> |
| 4  | CN                                           | Bituminous Coal    | 1.07%          | 4.19<br>10 <sup>-1</sup> | CN   | Bituminous Coal    | 1.06%          | 2.67<br>10 <sup>-1</sup> | CN   | Bituminous Coal    | 1.06%          | 1.51<br>10 <sup>-1</sup> | CN   | Bituminous Coal    | 1.06%          | 3.35<br>10 <sup>-2</sup> | CN   | Bituminous Coal    | 1.06%          | 7.37<br>10 <sup>-3</sup> | CN   | Bituminous Coal    | 1.06%          | 1.56<br>10 <sup>-3</sup> |
| 5  | CN                                           | Steam-Hot W. Sply. | 0.67%          | 2.63<br>10 <sup>-1</sup> | CN   | Steam-Hot W. Sply. | 0.57%          | 1.43<br>10 <sup>-1</sup> | CN   | Steam-Hot W. Sply. | 0.54%          | 7.76<br>10 <sup>-2</sup> | CN   | Steam-Hot W. Sply. | 0.46%          | 1.45<br>10 <sup>-2</sup> | CN   | Steam-Hot W. Sply. | 0.45%          | 3.17<br>10 <sup>-3</sup> | CN   | Steam-Hot W. Sply. | 0.51%          | 7.50<br>10 <sup>-4</sup> |

|    |    |                            |       |                      |    |                            |       |                      |    |                            |       |                      |    |                            |       |                      |    |                            |       |                      |    |                            |       |                      |
|----|----|----------------------------|-------|----------------------|----|----------------------------|-------|----------------------|----|----------------------------|-------|----------------------|----|----------------------------|-------|----------------------|----|----------------------------|-------|----------------------|----|----------------------------|-------|----------------------|
| 6  | CN | Rubber and plastic         | 0.37% | $1.44 \cdot 10^{-1}$ | CN | Rubber and plastic         | 0.31% | $7.76 \cdot 10^{-2}$ | CN | Rubber and plastic         | 0.29% | $4.19 \cdot 10^{-2}$ | CN | Rubber and plastic         | 0.24% | $7.72 \cdot 10^{-3}$ | CN | Rubber and plastic         | 0.24% | $1.68 \cdot 10^{-3}$ | CN | Rubber and plastic         | 0.27% | $4.03 \cdot 10^{-4}$ |
| 7  | CN | O. Machinery and Computers | 0.34% | $1.32 \cdot 10^{-1}$ | CN | O. Machinery and Computers | 0.28% | $6.93 \cdot 10^{-2}$ | CN | O. Machinery and Computers | 0.26% | $3.71 \cdot 10^{-2}$ | CN | O. Machinery and Computers | 0.21% | $6.60 \cdot 10^{-3}$ | CN | O. Machinery and Computers | 0.21% | $1.44 \cdot 10^{-3}$ | CN | O. Machinery and Computers | 0.24% | $3.52 \cdot 10^{-4}$ |
| 8  | CN | Chemicals nec              | 0.26% | $1.03 \cdot 10^{-1}$ | CN | Chemicals nec              | 0.22% | $5.55 \cdot 10^{-2}$ | CN | Chemicals nec              | 0.21% | $3.00 \cdot 10^{-2}$ | CN | Chemicals nec              | 0.17% | $5.50 \cdot 10^{-3}$ | CN | Chemicals nec              | 0.17% | $1.20 \cdot 10^{-3}$ | CN | Chemicals nec              | 0.20% | $2.88 \cdot 10^{-4}$ |
| 9  | CN | Air transport services     | 0.19% | $7.34 \cdot 10^{-2}$ | CN | Other mineral products     | 0.16% | $4.08 \cdot 10^{-2}$ | CN | Other mineral products     | 0.16% | $2.23 \cdot 10^{-2}$ | CN | Other mineral products     | 0.14% | $4.33 \cdot 10^{-3}$ | CN | Other mineral products     | 0.14% | $9.47 \cdot 10^{-4}$ | CN | Other mineral products     | 0.15% | $2.19 \cdot 10^{-4}$ |
| 10 | CN | Other mineral products     | 0.19% | $7.28 \cdot 10^{-2}$ | CN | Air transport services     | 0.16% | $4.03 \cdot 10^{-2}$ | CN | Air transport services     | 0.15% | $2.19 \cdot 10^{-2}$ | CN | Air transport services     | 0.13% | $4.13 \cdot 10^{-3}$ | CN | Air transport services     | 0.13% | $9.01 \cdot 10^{-4}$ | CN | Air transport services     | 0.14% | $2.12 \cdot 10^{-4}$ |
| 11 | CN | Supporting transport       | 0.12% | $4.72 \cdot 10^{-2}$ | CN | Supporting transport       | 0.10% | $2.61 \cdot 10^{-2}$ | CN | Supporting transport       | 0.10% | $1.42 \cdot 10^{-2}$ | CN | Supporting transport       | 0.09% | $2.70 \cdot 10^{-3}$ | CN | Supporting transport       | 0.09% | $5.91 \cdot 10^{-4}$ | CN | Supporting transport       | 0.09% | $1.38 \cdot 10^{-4}$ |
| 12 | CN | Coke Oven                  | 0.10% | $3.79 \cdot 10^{-2}$ | CN | Coke Oven                  | 0.09% | $2.18 \cdot 10^{-2}$ | CN | Coke Oven                  | 0.08% | $1.20 \cdot 10^{-2}$ | CN | Coke Oven                  | 0.08% | $2.40 \cdot 10^{-3}$ | CN | Coke Oven                  | 0.08% | $5.26 \cdot 10^{-4}$ | CN | Coke Oven                  | 0.08% | $1.19 \cdot 10^{-4}$ |
| 13 | CN | Inland transportation      | 0.09% | $3.65 \cdot 10^{-2}$ | CN | Inland transportation      | 0.08% | $2.02 \cdot 10^{-2}$ | CN | Inland transportation      | 0.08% | $1.10 \cdot 10^{-2}$ | CN | Inland transportation      | 0.07% | $2.08 \cdot 10^{-3}$ | CN | Inland transportation      | 0.07% | $4.55 \cdot 10^{-4}$ | CN | Inland transportation      | 0.07% | $1.07 \cdot 10^{-4}$ |
| 14 | CN | Sea transportation         | 0.09% | $3.47 \cdot 10^{-2}$ | CN | Sea transportation         | 0.08% | $1.95 \cdot 10^{-2}$ | CN | Sea transportation         | 0.08% | $1.07 \cdot 10^{-2}$ | CN | Sea transportation         | 0.07% | $2.07 \cdot 10^{-3}$ | CN | Sea transportation         | 0.07% | $4.52 \cdot 10^{-4}$ | CN | Sea transportation         | 0.07% | $1.04 \cdot 10^{-4}$ |
| 15 | CN | Other business services    | 0.07% | $2.91 \cdot 10^{-2}$ | CN | Other business services    | 0.07% | $1.65 \cdot 10^{-2}$ | CN | Other business services    | 0.06% | $9.06 \cdot 10^{-3}$ | CN | Other business services    | 0.06% | $1.78 \cdot 10^{-3}$ | CN | Other business services    | 0.06% | $3.89 \cdot 10^{-4}$ | CN | Other business services    | 0.06% | $8.92 \cdot 10^{-5}$ |
| 16 | CN | Railway transportation     | 0.07% | $2.76 \cdot 10^{-2}$ | CN | Railway transportation     | 0.06% | $1.54 \cdot 10^{-2}$ | CN | Railway transportation     | 0.06% | $8.39 \cdot 10^{-3}$ | CN | Railway transportation     | 0.05% | $1.61 \cdot 10^{-3}$ | CN | Railway transportation     | 0.05% | $3.52 \cdot 10^{-4}$ | CN | Railway transportation     | 0.06% | $8.20 \cdot 10^{-5}$ |
| 17 | DE | Sea transportation         | 0.07% | $2.68 \cdot 10^{-2}$ | DE | Sea transportation         | 0.06% | $1.48 \cdot 10^{-2}$ | DE | Sea transportation         | 0.06% | $8.06 \cdot 10^{-3}$ | DE | Sea transportation         | 0.05% | $1.53 \cdot 10^{-3}$ | DE | Sea transportation         | 0.05% | $3.34 \cdot 10^{-4}$ | DE | Sea transportation         | 0.05% | $7.84 \cdot 10^{-5}$ |
| 18 | CN | Paper products             | 0.07% | $2.61 \cdot 10^{-2}$ | CN | Paper products             | 0.06% | $1.43 \cdot 10^{-2}$ | CN | Paper products             | 0.05% | $7.76 \cdot 10^{-3}$ | CN | Crude petroleum            | 0.05% | $1.48 \cdot 10^{-3}$ | CN | Crude petroleum            | 0.05% | $3.24 \cdot 10^{-4}$ | CN | Paper products             | 0.05% | $7.51 \cdot 10^{-5}$ |
| 19 | CN | Land transportation        | 0.06% | $2.42 \cdot 10^{-2}$ | CN | Crude petroleum            | 0.05% | $1.35 \cdot 10^{-2}$ | CN | Crude petroleum            | 0.05% | $7.43 \cdot 10^{-3}$ | CN | Paper products             | 0.05% | $1.46 \cdot 10^{-3}$ | CN | Paper products             | 0.05% | $3.18 \cdot 10^{-4}$ | CN | Crude petroleum            | 0.05% | $7.36 \cdot 10^{-5}$ |
| 20 | CN | Crude petroleum            | 0.06% | $2.36 \cdot 10^{-2}$ | CN | Land transportation        | 0.05% | $1.34 \cdot 10^{-2}$ | CN | Land transportation        | 0.05% | $7.30 \cdot 10^{-3}$ | CN | Land transportation        | 0.04% | $1.39 \cdot 10^{-3}$ | CN | Land transportation        | 0.04% | $3.04 \cdot 10^{-4}$ | CN | Land transportation        | 0.05% | $7.11 \cdot 10^{-5}$ |

b) Finland

Table 57: Carbon Footprint Distribution of Bitcoin mining in Finland per transaction by country

| Order | GWP per transaction per year (kgCO2-eqv.) |             |        |      |             |        |      |             |        |      |             |       |      |             |       |      |             |                      |
|-------|-------------------------------------------|-------------|--------|------|-------------|--------|------|-------------|--------|------|-------------|-------|------|-------------|-------|------|-------------|----------------------|
|       | 2020                                      |             |        | 2019 |             |        | 2018 |             |        | 2017 |             |       | 2016 |             |       | 2015 |             |                      |
|       | C.C.                                      | P.A.D.* (%) | GWP    | C.C. | P.A.D.* (%) | GWP    | C.C. | P.A.D.* (%) | GWP    | C.C. | P.A.D.* (%) | GWP   | C.C. | P.A.D.* (%) | GWP   | C.C. | P.A.D.* (%) | GWP                  |
| 1     | FI                                        | 40.08%      | 96.568 | FI   | 41.94%      | 63.391 | FI   | 42.41%      | 53.780 | FI   | 44.10%      | 9.394 | FI   | 44.20%      | 2.930 | FI   | 43.13%      | 1.191                |
| 2     | RU                                        | 35.39%      | 85.267 | RU   | 37.01%      | 55.938 | RU   | 37.42%      | 47.450 | RU   | 38.89%      | 8.285 | RU   | 38.98%      | 2.584 | RU   | 38.04%      | 1.050                |
| 3     | CN                                        | 20.21%      | 48.695 | CN   | 16.94%      | 25.606 | CN   | 16.12%      | 20.444 | CN   | 13.16%      | 2.803 | CN   | 12.99%      | 0.861 | CN   | 14.87%      | $4.11 \cdot 10^{-1}$ |
| 4     | WA                                        | 0.56%       | 1.340  | WA   | 0.52%       | 0.784  | WA   | 0.51%       | 0.646  | SE   | 0.51%       | 0.109 | SE   | 0.51%       | 0.034 | SE   | 0.50%       | $1.38 \cdot 10^{-2}$ |
| 5     | SE                                        | 0.47%       | 1.124  | SE   | 0.49%       | 0.736  | SE   | 0.49%       | 0.624  | WA   | 0.48%       | 0.101 | WA   | 0.47%       | 0.031 | WA   | 0.50%       | $1.37 \cdot 10^{-2}$ |
| 6     | WM                                        | 0.43%       | 1.043  | WM   | 0.41%       | 0.613  | WM   | 0.40%       | 0.506  | WM   | 0.37%       | 0.080 | WM   | 0.37%       | 0.025 | WM   | 0.39%       | $1.07 \cdot 10^{-2}$ |
| 7     | US                                        | 0.37%       | 0.897  | US   | 0.34%       | 0.516  | US   | 0.33%       | 0.423  | US   | 0.31%       | 0.065 | US   | 0.30%       | 0.020 | US   | 0.32%       | $8.89 \cdot 10^{-3}$ |
| 8     | JP                                        | 0.35%       | 0.847  | JP   | 0.30%       | 0.454  | JP   | 0.29%       | 0.365  | DE   | 0.26%       | 0.056 | DE   | 0.26%       | 0.017 | DE   | 0.27%       | $7.48 \cdot 10^{-3}$ |

|           |    |       |       |    |       |       |    |       |       |    |       |       |    |       |       |    |       |                       |
|-----------|----|-------|-------|----|-------|-------|----|-------|-------|----|-------|-------|----|-------|-------|----|-------|-----------------------|
| <b>9</b>  | DE | 0.30% | 0.723 | DE | 0.28% | 0.427 | DE | 0.28% | 0.352 | JP | 0.24% | 0.051 | JP | 0.24% | 0.016 | JP | 0.27% | 7.41 10 <sup>-3</sup> |
| <b>10</b> | KR | 0.28% | 0.668 | KR | 0.24% | 0.360 | KR | 0.23% | 0.289 | KR | 0.19% | 0.041 | KR | 0.19% | 0.013 | KR | 0.21% | 5.89 10 <sup>-3</sup> |

Table 58: Carbon Footprint Distribution of Bitcoin mining in Finland per transaction by sector in Supply Chain

| O.        | GWP per transaction per year (kgCO <sub>2</sub> -eqv.) |                                  |             |        |      |                                  |             |        |      |                                  |             |        |      |                                  |             |                       |      |                                       |             |                       |      |                                  |             |                       |
|-----------|--------------------------------------------------------|----------------------------------|-------------|--------|------|----------------------------------|-------------|--------|------|----------------------------------|-------------|--------|------|----------------------------------|-------------|-----------------------|------|---------------------------------------|-------------|-----------------------|------|----------------------------------|-------------|-----------------------|
|           | 2020                                                   |                                  |             |        | 2019 |                                  |             |        | 2018 |                                  |             |        | 2017 |                                  |             |                       | 2016 |                                       |             |                       | 2015 |                                  |             |                       |
|           | C.C.                                                   | Sector                           | P.A.D.* (%) | GWP    | C.C. | Sector                           | P.A.D.* (%) | GWP    | C.C. | Sector                           | P.A.D.* (%) | GWP    | C.C. | Sector                           | P.A.D.* (%) | GWP                   | C.C. | Sector                                | P.A.D.* (%) | GWP                   | C.C. | Sector                           | P.A.D.* (%) | GWP                   |
| <b>1</b>  | FI                                                     | Elec. Coal                       | 32.24%      | 77.670 | FI   | Elec. Coal                       | 33.74%      | 50.986 | FI   | Elec. Coal                       | 34.11%      | 43.256 | FI   | Elec. Coal                       | 35.47%      | 7.556                 | FI   | Elec. Coal                            | 35.55%      | 2.357                 | FI   | Elec. Coal                       | 34.69%      | 9.58 10 <sup>-1</sup> |
| <b>2</b>  | RU                                                     | Natural Gas Services             | 30.75%      | 74.097 | RU   | Natural Gas Services             | 32.18%      | 48.640 | RU   | Natural Gas Services             | 32.54%      | 41.265 | RU   | Natural Gas Services             | 33.84%      | 7.208                 | RU   | Natural Gas Services                  | 33.91%      | 2.248                 | RU   | Natural Gas Services             | 33.09%      | 9.14 10 <sup>-1</sup> |
| <b>3</b>  | CN                                                     | Elec. Coal                       | 11.51%      | 27.734 | CN   | Elec. Coal                       | 9.64%       | 14.574 | CN   | Elec. Coal                       | 9.18%       | 11.634 | CN   | Elec. Coal                       | 7.48%       | 1.593                 | CN   | Elec. Coal                            | 7.39%       | 4.90 10 <sup>-1</sup> | CN   | Elec. Coal                       | 8.46%       | 2.34 10 <sup>-1</sup> |
| <b>4</b>  | RU                                                     | Bituminous Coal                  | 2.99%       | 7.209  | RU   | Bituminous Coal                  | 3.13%       | 4.728  | RU   | Bituminous Coal                  | 3.16%       | 4.010  | RU   | Bituminous Coal                  | 3.29%       | 7.00 10 <sup>-1</sup> | RU   | Bituminous Coal                       | 3.29%       | 2.18 10 <sup>-1</sup> | RU   | Bituminous Coal                  | 3.22%       | 8.88 10 <sup>-2</sup> |
| <b>5</b>  | CN                                                     | Iron and Steel                   | 2.58%       | 6.222  | FI   | Electricity by biomass and waste | 2.45%       | 3.698  | FI   | Electricity by biomass and waste | 2.47%       | 3.138  | FI   | Electricity by biomass and waste | 2.57%       | 5.48 10 <sup>-1</sup> | FI   | Electricity by biomass and waste      | 2.58%       | 1.71 10 <sup>-1</sup> | FI   | Electricity by biomass and waste | 2.52%       | 6.95 10 <sup>-2</sup> |
| <b>6</b>  | FI                                                     | Electricity by biomass and waste | 2.34%       | 5.634  | CN   | Iron and Steel                   | 2.17%       | 3.274  | CN   | Iron and Steel                   | 2.06%       | 2.614  | CN   | Iron and Steel                   | 1.68%       | 3.59 10 <sup>-1</sup> | CN   | Iron and Steel                        | 1.66%       | 1.10 10 <sup>-1</sup> | CN   | Iron and Steel                   | 1.90%       | 5.25 10 <sup>-2</sup> |
| <b>7</b>  | FI                                                     | Natural Gas Liquids              | 1.11%       | 2.662  | FI   | Natural Gas Liquids              | 1.16%       | 1.747  | FI   | Natural Gas Liquids              | 1.17%       | 1.483  | FI   | Natural Gas Liquids              | 1.22%       | 2.59 10 <sup>-1</sup> | FI   | Natural Gas Liquids                   | 1.22%       | 8.08 10 <sup>-2</sup> | FI   | Natural Gas Liquids              | 1.19%       | 3.28 10 <sup>-2</sup> |
| <b>8</b>  | CN                                                     | Steam-Hot W. Sply.               | 1.08%       | 2.609  | FI   | Electricity by nuclear           | 0.96%       | 1.457  | FI   | Electricity by nuclear           | 0.97%       | 1.236  | FI   | Electricity by nuclear           | 1.01%       | 2.16 10 <sup>-1</sup> | FI   | Electricity by nuclear                | 1.02%       | 6.73 10 <sup>-2</sup> | FI   | Electricity by nuclear           | 0.99%       | 2.74 10 <sup>-2</sup> |
| <b>9</b>  | FI                                                     | Electricity by nuclear           | 0.92%       | 2.219  | CN   | Steam-Hot W. Sply.               | 0.91%       | 1.371  | CN   | Steam-Hot W. Sply.               | 0.86%       | 1.095  | FI   | Elec. Gas                        | 0.73%       | 1.55 10 <sup>-1</sup> | FI   | Elec. Gas                             | 0.73%       | 4.83 10 <sup>-2</sup> | CN   | Steam-Hot W. Sply.               | 0.80%       | 2.20 10 <sup>-2</sup> |
| <b>10</b> | FI                                                     | Elec. Gas                        | 0.66%       | 1.591  | FI   | Elec. Gas                        | 0.69%       | 1.045  | FI   | Elec. Gas                        | 0.70%       | 0.886  | CN   | Steam-Hot W. Sply.               | 0.70%       | 1.50 10 <sup>-1</sup> | FI   | Electricity by hydro                  | 0.71%       | 4.67 10 <sup>-2</sup> | FI   | Elec. Gas                        | 0.71%       | 1.96 10 <sup>-2</sup> |
| <b>11</b> | FI                                                     | Electricity by hydro             | 0.64%       | 1.539  | FI   | Electricity by hydro             | 0.67%       | 1.011  | FI   | Electricity by hydro             | 0.68%       | 0.857  | FI   | Electricity by hydro             | 0.70%       | 1.50 10 <sup>-1</sup> | CN   | Steam-Hot W. Sply.                    | 0.70%       | 4.61 10 <sup>-2</sup> | FI   | Electricity by hydro             | 0.69%       | 1.90 10 <sup>-2</sup> |
| <b>12</b> | CN                                                     | O. Machinery and Computers       | 0.64%       | 1.531  | CN   | O. Machinery and Computers       | 0.53%       | 0.803  | CN   | O. Machinery and Computers       | 0.51%       | 0.641  | CN   | O. Machinery and Computers       | 0.41%       | 8.76 10 <sup>-2</sup> | CN   | O. Machinery and Computers            | 0.41%       | 2.69 10 <sup>-2</sup> | CN   | O. Machinery and Computers       | 0.47%       | 1.29 10 <sup>-2</sup> |
| <b>13</b> | CN                                                     | Rubber and plastic               | 0.63%       | 1.515  | CN   | Rubber and plastic               | 0.53%       | 0.797  | CN   | Rubber and plastic               | 0.50%       | 0.636  | CN   | Rubber and plastic               | 0.41%       | 8.72 10 <sup>-2</sup> | CN   | Rubber and plastic                    | 0.40%       | 2.68 10 <sup>-2</sup> | CN   | Rubber and plastic               | 0.46%       | 1.28 10 <sup>-2</sup> |
| <b>14</b> | CN                                                     | Chemicals nec                    | 0.46%       | 1.096  | CN   | Chemicals nec                    | 0.38%       | 0.576  | CN   | Chemicals nec                    | 0.36%       | 0.460  | RU   | Heavy Fuel Oil                   | 0.33%       | 7.10 10 <sup>-2</sup> | RU   | Heavy Fuel Oil                        | 0.33%       | 2.21 10 <sup>-2</sup> | CN   | Chemicals nec                    | 0.34%       | 9.25 10 <sup>-3</sup> |
| <b>15</b> | RU                                                     | Heavy Fuel Oil                   | 0.31%       | 0.738  | RU   | Heavy Fuel Oil                   | 0.32%       | 0.482  | RU   | Heavy Fuel Oil                   | 0.32%       | 0.408  | RU   | Steam-Hot W. Sply.               | 0.33%       | 6.92 10 <sup>-2</sup> | RU   | Steam-Hot W. Sply.                    | 0.33%       | 2.16 10 <sup>-2</sup> | RU   | Heavy Fuel Oil                   | 0.33%       | 9.02 10 <sup>-3</sup> |
| <b>16</b> | RU                                                     | Steam-Hot W. Sply.               | 0.30%       | 0.724  | RU   | Steam-Hot W. Sply.               | 0.31%       | 0.472  | RU   | Steam-Hot W. Sply.               | 0.32%       | 0.399  | FI   | Elec. Petroleum                  | 0.30%       | 6.48 10 <sup>-2</sup> | FI   | Elec. Petroleum                       | 0.31%       | 2.02 10 <sup>-2</sup> | RU   | Steam-Hot W. Sply.               | 0.32%       | 8.81 10 <sup>-3</sup> |
| <b>17</b> | CN                                                     | Air transport services           | 0.30%       | 0.710  | FI   | Elec. Petroleum                  | 0.29%       | 0.437  | FI   | Elec. Petroleum                  | 0.29%       | 0.371  | CN   | Chemicals nec                    | 0.30%       | 6.31 10 <sup>-2</sup> | RU   | Transportation services via pipelines | 0.29%       | 1.95 10 <sup>-2</sup> | FI   | Elec. Petroleum                  | 0.30%       | 8.21 10 <sup>-3</sup> |



|    |    |                                       |       |       |    |                                       |       |       |    |                                       |       |       |    |                                       |       |                      |    |                        |       |                      |    |                                       |       |                      |
|----|----|---------------------------------------|-------|-------|----|---------------------------------------|-------|-------|----|---------------------------------------|-------|-------|----|---------------------------------------|-------|----------------------|----|------------------------|-------|----------------------|----|---------------------------------------|-------|----------------------|
| 18 | CN | Bituminous Coal                       | 0.29% | 0.688 | RU | Transportation services via pipelines | 0.28% | 0.426 | RU | Transportation services via pipelines | 0.28% | 0.360 | RU | Transportation services via pipelines | 0.29% | $6.25 \cdot 10^{-2}$ | CN | Chemicals nec          | 0.29% | $1.94 \cdot 10^{-2}$ | RU | Transportation services via pipelines | 0.29% | $7.95 \cdot 10^{-3}$ |
| 19 | FI | Elec. Petroleum                       | 0.28% | 0.666 | FI | Steam-Hot W. Sply.                    | 0.26% | 0.388 | FI | Steam-Hot W. Sply.                    | 0.26% | 0.330 | FI | Steam-Hot W. Sply.                    | 0.27% | $5.76 \cdot 10^{-2}$ | FI | Steam-Hot W. Sply.     | 0.27% | $1.80 \cdot 10^{-2}$ | FI | Steam-Hot W. Sply.                    | 0.26% | $7.30 \cdot 10^{-3}$ |
| 20 | RU | Transportation services via pipelines | 0.27% | 0.655 | CN | Air transport services                | 0.25% | 0.374 | CN | Air transport services                | 0.24% | 0.298 | FI | Dist. of gaseous fuels                | 0.23% | $4.81 \cdot 10^{-2}$ | FI | Dist. of gaseous fuels | 0.23% | $1.50 \cdot 10^{-2}$ | FI | Dist. of gaseous fuels                | 0.22% | $6.09 \cdot 10^{-3}$ |

Table 59: Total Annual Carbon Footprint Distribution of Bitcoin mining in Finland by country

| Order | Total GWP per year (MtCO <sub>2</sub> -eqv.) |                |                       |      |                |                       |      |                |                       |      |                |                       |      |                |                       |      |                |                       |
|-------|----------------------------------------------|----------------|-----------------------|------|----------------|-----------------------|------|----------------|-----------------------|------|----------------|-----------------------|------|----------------|-----------------------|------|----------------|-----------------------|
|       | 2020                                         |                |                       | 2019 |                |                       | 2018 |                |                       | 2017 |                |                       | 2016 |                |                       | 2015 |                |                       |
|       | C.C.                                         | P.A.D.*<br>(%) | GWP                   | C.C. | P.A.D.*<br>(%) | GWP                   | C.C. | P.A.D.*<br>(%) | GWP                   | C.C. | P.A.D.*<br>(%) | GWP                   | C.C. | P.A.D.*<br>(%) | GWP                   | C.C. | P.A.D.*<br>(%) | GWP                   |
| 1     | FI                                           | 40.08%         | 2.97 10 <sup>-2</sup> | FI   | 41.94%         | 1.34 10 <sup>-1</sup> | FI   | 42.41%         | 3.98 10 <sup>-2</sup> | FI   | 44.10%         | 3.12841               | FI   | 44.20%         | 7.86 10 <sup>-3</sup> | FI   | 43.13%         | 2.45 10 <sup>-3</sup> |
| 2     | RU                                           | 35.39%         | 2.62 10 <sup>-2</sup> | RU   | 37.01%         | 1.18 10 <sup>-1</sup> | RU   | 37.42%         | 3.51 10 <sup>-2</sup> | RU   | 38.89%         | 5.81 10 <sup>-3</sup> | RU   | 38.98%         | 6.93 10 <sup>-3</sup> | RU   | 38.04%         | 2.16 10 <sup>-3</sup> |
| 3     | CN                                           | 20.21%         | 1.5 10 <sup>-2</sup>  | CN   | 16.94%         | 5.41 10 <sup>-2</sup> | CN   | 16.12%         | 1.51 10 <sup>-2</sup> | CN   | 13.16%         | 5.04 10 <sup>-3</sup> | CN   | 12.99%         | 2.31 10 <sup>-3</sup> | CN   | 14.87%         | 8.45 10 <sup>-4</sup> |
| 4     | WA                                           | 0.56%          | 4.12 10 <sup>-4</sup> | WA   | 0.52%          | 1.66 10 <sup>-3</sup> | WA   | 0.51%          | 4.78 10 <sup>-4</sup> | SE   | 0.51%          | 4.38 10 <sup>-3</sup> | SE   | 0.51%          | 9.1 10 <sup>-5</sup>  | SE   | 0.50%          | 2.84 10 <sup>-5</sup> |
| 5     | SE                                           | 0.47%          | 3.46 10 <sup>-4</sup> | SE   | 0.49%          | 1.55 10 <sup>-3</sup> | SE   | 0.49%          | 4.62 10 <sup>-4</sup> | WA   | 0.48%          | 3.62 10 <sup>-3</sup> | WA   | 0.47%          | 8.43 10 <sup>-5</sup> | WA   | 0.50%          | 2.82 10 <sup>-5</sup> |
| 6     | WM                                           | 0.43%          | 3.21 10 <sup>-4</sup> | WM   | 0.41%          | 1.29 10 <sup>-3</sup> | WM   | 0.40%          | 3.74 10 <sup>-4</sup> | WM   | 0.37%          | 3.56 10 <sup>-3</sup> | WM   | 0.37%          | 6.62 10 <sup>-5</sup> | WM   | 0.39%          | 2.21 10 <sup>-5</sup> |
| 7     | US                                           | 0.37%          | 2.76 10 <sup>-4</sup> | US   | 0.34%          | 1.09 10 <sup>-3</sup> | US   | 0.33%          | 3.13 10 <sup>-4</sup> | US   | 0.31%          | 3.4 10 <sup>-3</sup>  | US   | 0.30%          | 5.41 10 <sup>-5</sup> | US   | 0.32%          | 1.83 10 <sup>-5</sup> |
| 8     | JP                                           | 0.35%          | 2.61 10 <sup>-4</sup> | JP   | 0.30%          | 9.6 10 <sup>-4</sup>  | JP   | 0.29%          | 2.7 10 <sup>-4</sup>  | DE   | 0.26%          | 2.46 10 <sup>-3</sup> | DE   | 0.26%          | 4.64 10 <sup>-5</sup> | DE   | 0.27%          | 1.54 10 <sup>-5</sup> |
| 9     | DE                                           | 0.30%          | 2.22 10 <sup>-4</sup> | DE   | 0.28%          | 9.01 10 <sup>-4</sup> | DE   | 0.28%          | 2.6 10 <sup>-4</sup>  | JP   | 0.24%          | 1.58 10 <sup>-3</sup> | JP   | 0.24%          | 4.25 10 <sup>-5</sup> | JP   | 0.27%          | 1.52 10 <sup>-5</sup> |
| 10    | KR                                           | 0.28%          | 2.05 10 <sup>-4</sup> | KR   | 0.24%          | 7.6 10 <sup>-4</sup>  | KR   | 0.23%          | 2.14 10 <sup>-4</sup> | KR   | 0.19%          | 1.22 10 <sup>-3</sup> | KR   | 0.19%          | 3.39 10 <sup>-5</sup> | KR   | 0.21%          | 1.21 10 <sup>-5</sup> |

Table 60: Total Annual Carbon Footprint Distribution of Bitcoin mining in Finland by sector

| O. | GWP per transaction per year (kgCO <sub>2</sub> -eqv.) |                                  |             |                          |      |                                  |             |                          |      |                                  |             |                          |      |                                  |             |                          |      |                                  |             |                          |      |                                  |             |                          |
|----|--------------------------------------------------------|----------------------------------|-------------|--------------------------|------|----------------------------------|-------------|--------------------------|------|----------------------------------|-------------|--------------------------|------|----------------------------------|-------------|--------------------------|------|----------------------------------|-------------|--------------------------|------|----------------------------------|-------------|--------------------------|
|    | 2020                                                   |                                  |             |                          | 2019 |                                  |             |                          | 2018 |                                  |             |                          | 2017 |                                  |             |                          | 2016 |                                  |             |                          | 2015 |                                  |             |                          |
|    | C.C.                                                   | Sector                           | P.A.D.* (%) | GWP                      | C.C. | Sector                           | P.A.D.* (%) | GWP                      | C.C. | Sector                           | P.A.D.* (%) | GWP                      | C.C. | Sector                           | P.A.D.* (%) | GWP                      | C.C. | Sector                           | P.A.D.* (%) | GWP                      | C.C. | Sector                           | P.A.D.* (%) | GWP                      |
| 1  | FI                                                     | Elec. Coal                       | 32.24%      | 2.39<br>10 <sup>-2</sup> | FI   | Elec. Coal                       | 33.74%      | 1.08<br>10 <sup>-1</sup> | FI   | Elec. Coal                       | 34.11%      | 3.20<br>10 <sup>-2</sup> | FI   | Elec. Coal                       | 35.47%      | 1.48<br>10 <sup>-2</sup> | FI   | Elec. Coal                       | 35.55%      | 6.32<br>10 <sup>-3</sup> | FI   | Elec. Coal                       | 34.69%      | 1.97<br>10 <sup>-3</sup> |
| 2  | RU                                                     | Natural Gas Services             | 30.75%      | 2.28<br>10 <sup>-2</sup> | RU   | Natural Gas Services             | 32.18%      | 1.03<br>10 <sup>-1</sup> | RU   | Natural Gas Services             | 32.54%      | 3.05<br>10 <sup>-2</sup> | RU   | Natural Gas Services             | 33.84%      | 1.41<br>10 <sup>-2</sup> | RU   | Natural Gas Services             | 33.91%      | 6.03<br>10 <sup>-3</sup> | RU   | Natural Gas Services             | 33.09%      | 1.88<br>10 <sup>-3</sup> |
| 3  | CN                                                     | Elec. Coal                       | 11.51%      | 8.53<br>10 <sup>-3</sup> | CN   | Elec. Coal                       | 9.64%       | 3.08<br>10 <sup>-2</sup> | CN   | Elec. Coal                       | 9.18%       | 8.60<br>10 <sup>-3</sup> | CN   | Elec. Coal                       | 7.48%       | 3.13<br>10 <sup>-3</sup> | CN   | Elec. Coal                       | 7.39%       | 1.31<br>10 <sup>-3</sup> | CN   | Elec. Coal                       | 8.46%       | 4.81<br>10 <sup>-4</sup> |
| 4  | RU                                                     | Bituminous Coal                  | 2.99%       | 2.22<br>10 <sup>-3</sup> | RU   | Bituminous Coal                  | 3.13%       | 9.98<br>10 <sup>-3</sup> | RU   | Bituminous Coal                  | 3.16%       | 2.96<br>10 <sup>-3</sup> | RU   | Bituminous Coal                  | 3.29%       | 1.37<br>10 <sup>-3</sup> | RU   | Bituminous Coal                  | 3.29%       | 5.85<br>10 <sup>-4</sup> | RU   | Bituminous Coal                  | 3.22%       | 1.83<br>10 <sup>-4</sup> |
| 5  | CN                                                     | Iron and Steel                   | 2.58%       | 1.91<br>10 <sup>-3</sup> | FI   | Electricity by biomass and waste | 2.45%       | 7.81<br>10 <sup>-3</sup> | FI   | Electricity by biomass and waste | 2.47%       | 2.32<br>10 <sup>-3</sup> | FI   | Electricity by biomass and waste | 2.57%       | 1.08<br>10 <sup>-3</sup> | FI   | Electricity by biomass and waste | 2.58%       | 4.58<br>10 <sup>-4</sup> | FI   | Electricity by biomass and waste | 2.52%       | 1.43<br>10 <sup>-4</sup> |
| 6  | FI                                                     | Electricity by biomass and waste | 2.34%       | 1.73<br>10 <sup>-3</sup> | CN   | Iron and Steel                   | 2.17%       | 6.91<br>10 <sup>-3</sup> | CN   | Iron and Steel                   | 2.06%       | 1.93<br>10 <sup>-3</sup> | CN   | Iron and Steel                   | 1.68%       | 7.04<br>10 <sup>-4</sup> | CN   | Iron and Steel                   | 1.66%       | 2.96<br>10 <sup>-4</sup> | CN   | Iron and Steel                   | 1.90%       | 1.08<br>10 <sup>-4</sup> |

|    |    |                                       |       |                          |    |                                       |       |                          |    |                                       |       |                          |    |                                       |       |                          |    |                                       |       |                          |    |                                       |       |                          |
|----|----|---------------------------------------|-------|--------------------------|----|---------------------------------------|-------|--------------------------|----|---------------------------------------|-------|--------------------------|----|---------------------------------------|-------|--------------------------|----|---------------------------------------|-------|--------------------------|----|---------------------------------------|-------|--------------------------|
| 7  | FI | Natural Gas Liquids                   | 1.11% | 8.19<br>10 <sup>-4</sup> | FI | Natural Gas Liquids                   | 1.16% | 3.69<br>10 <sup>-3</sup> | FI | Natural Gas Liquids                   | 1.17% | 1.10<br>10 <sup>-3</sup> | FI | Natural Gas Liquids                   | 1.22% | 5.08<br>10 <sup>-4</sup> | FI | Natural Gas Liquids                   | 1.22% | 2.17<br>10 <sup>-4</sup> | FI | Natural Gas Liquids                   | 1.19% | 6.76<br>10 <sup>-5</sup> |
| 8  | CN | Steam-Hot W. Sply.                    | 1.08% | 8.02<br>10 <sup>-4</sup> | FI | Electricity by nuclear                | 0.96% | 3.08<br>10 <sup>-3</sup> | FI | Electricity by nuclear                | 0.97% | 9.14<br>10 <sup>-4</sup> | FI | Electricity by nuclear                | 1.01% | 4.23<br>10 <sup>-4</sup> | FI | Electricity by nuclear                | 1.02% | 1.81<br>10 <sup>-4</sup> | FI | Electricity by nuclear                | 0.99% | 5.63<br>10 <sup>-5</sup> |
| 9  | FI | Electricity by nuclear                | 0.92% | 6.82<br>10 <sup>-4</sup> | CN | Steam-Hot W. Sply.                    | 0.91% | 2.90<br>10 <sup>-3</sup> | CN | Steam-Hot W. Sply.                    | 0.86% | 8.09<br>10 <sup>-4</sup> | FI | Elec. Gas                             | 0.73% | 3.04<br>10 <sup>-4</sup> | FI | Elec. Gas                             | 0.73% | 1.29<br>10 <sup>-4</sup> | CN | Steam-Hot W. Sply.                    | 0.80% | 4.52<br>10 <sup>-5</sup> |
| 10 | FI | Elec. Gas                             | 0.66% | 4.89<br>10 <sup>-4</sup> | FI | Elec. Gas                             | 0.69% | 2.21<br>10 <sup>-3</sup> | FI | Elec. Gas                             | 0.70% | 6.55<br>10 <sup>-4</sup> | CN | Steam-Hot W. Sply.                    | 0.70% | 2.94<br>10 <sup>-4</sup> | FI | Electricity by hydro                  | 0.71% | 1.25<br>10 <sup>-4</sup> | FI | Elec. Gas                             | 0.71% | 4.04<br>10 <sup>-5</sup> |
| 11 | FI | Electricity by hydro                  | 0.64% | 4.73<br>10 <sup>-4</sup> | FI | Electricity by hydro                  | 0.67% | 2.13<br>10 <sup>-3</sup> | FI | Electricity by hydro                  | 0.68% | 6.34<br>10 <sup>-4</sup> | FI | Electricity by hydro                  | 0.70% | 2.94<br>10 <sup>-4</sup> | CN | Steam-Hot W. Sply.                    | 0.70% | 1.24<br>10 <sup>-4</sup> | FI | Electricity by hydro                  | 0.69% | 3.91<br>10 <sup>-5</sup> |
| 12 | CN | O. Machinery and Computers            | 0.64% | 4.71<br>10 <sup>-4</sup> | CN | O. Machinery and Computers            | 0.53% | 1.70<br>10 <sup>-3</sup> | CN | O. Machinery and Computers            | 0.51% | 4.74<br>10 <sup>-4</sup> | CN | O. Machinery and Computers            | 0.41% | 1.72<br>10 <sup>-4</sup> | CN | O. Machinery and Computers            | 0.41% | 7.21<br>10 <sup>-5</sup> | CN | O. Machinery and Computers            | 0.47% | 2.65<br>10 <sup>-5</sup> |
| 13 | CN | Rubber and plastic                    | 0.63% | 4.66<br>10 <sup>-4</sup> | CN | Rubber and plastic                    | 0.53% | 1.68<br>10 <sup>-3</sup> | CN | Rubber and plastic                    | 0.50% | 4.70<br>10 <sup>-4</sup> | CN | Rubber and plastic                    | 0.41% | 1.71<br>10 <sup>-4</sup> | CN | Rubber and plastic                    | 0.40% | 7.19<br>10 <sup>-5</sup> | CN | Rubber and plastic                    | 0.46% | 2.63<br>10 <sup>-5</sup> |
| 14 | CN | Chemicals nec                         | 0.46% | 3.37<br>10 <sup>-4</sup> | CN | Chemicals nec                         | 0.38% | 1.22<br>10 <sup>-3</sup> | CN | Chemicals nec                         | 0.36% | 3.40<br>10 <sup>-4</sup> | RU | Heavy Fuel Oil                        | 0.33% | 1.39<br>10 <sup>-4</sup> | RU | Heavy Fuel Oil                        | 0.33% | 5.94<br>10 <sup>-5</sup> | CN | Chemicals nec                         | 0.34% | 1.90<br>10 <sup>-5</sup> |
| 15 | RU | Heavy Fuel Oil                        | 0.31% | 2.27<br>10 <sup>-4</sup> | RU | Heavy Fuel Oil                        | 0.32% | 1.02<br>10 <sup>-3</sup> | RU | Heavy Fuel Oil                        | 0.32% | 3.02<br>10 <sup>-4</sup> | RU | Steam-Hot W. Sply.                    | 0.33% | 1.36<br>10 <sup>-4</sup> | RU | Steam-Hot W. Sply.                    | 0.33% | 5.79<br>10 <sup>-5</sup> | RU | Heavy Fuel Oil                        | 0.33% | 1.86<br>10 <sup>-5</sup> |
| 16 | RU | Steam-Hot W. Sply.                    | 0.30% | 2.23<br>10 <sup>-4</sup> | RU | Steam-Hot W. Sply.                    | 0.31% | 9.96<br>10 <sup>-4</sup> | RU | Steam-Hot W. Sply.                    | 0.32% | 2.95<br>10 <sup>-4</sup> | FI | Elec. Petroleum                       | 0.30% | 1.27<br>10 <sup>-4</sup> | FI | Elec. Petroleum                       | 0.31% | 5.42<br>10 <sup>-5</sup> | RU | Steam-Hot W. Sply.                    | 0.32% | 1.81<br>10 <sup>-5</sup> |
| 17 | CN | Air transport services                | 0.30% | 2.18<br>10 <sup>-4</sup> | FI | Elec. Petroleum                       | 0.29% | 9.24<br>10 <sup>-4</sup> | FI | Elec. Petroleum                       | 0.29% | 2.74<br>10 <sup>-4</sup> | CN | Chemicals nec                         | 0.30% | 1.24<br>10 <sup>-4</sup> | RU | Transportation services via pipelines | 0.29% | 5.22<br>10 <sup>-5</sup> | FI | Elec. Petroleum                       | 0.30% | 1.69<br>10 <sup>-5</sup> |
| 18 | CN | Bituminous Coal                       | 0.29% | 2.12<br>10 <sup>-4</sup> | RU | Transportation services via pipelines | 0.28% | 8.99<br>10 <sup>-4</sup> | RU | Transportation services via pipelines | 0.28% | 2.66<br>10 <sup>-4</sup> | RU | Transportation services via pipelines | 0.29% | 1.23<br>10 <sup>-4</sup> | CN | Chemicals nec                         | 0.29% | 5.20<br>10 <sup>-5</sup> | RU | Transportation services via pipelines | 0.29% | 1.64<br>10 <sup>-5</sup> |
| 19 | FI | Elec. Petroleum                       | 0.28% | 2.05<br>10 <sup>-4</sup> | FI | Steam-Hot W. Sply.                    | 0.26% | 8.20<br>10 <sup>-4</sup> | FI | Steam-Hot W. Sply.                    | 0.26% | 2.44<br>10 <sup>-4</sup> | FI | Steam-Hot W. Sply.                    | 0.27% | 1.13<br>10 <sup>-4</sup> | FI | Steam-Hot W. Sply.                    | 0.27% | 4.81<br>10 <sup>-5</sup> | FI | Steam-Hot W. Sply.                    | 0.26% | 1.50<br>10 <sup>-5</sup> |
| 20 | RU | Transportation services via pipelines | 0.27% | 2.02<br>10 <sup>-4</sup> | CN | Air transport services                | 0.25% | 7.89<br>10 <sup>-4</sup> | CN | Air transport services                | 0.24% | 2.21<br>10 <sup>-4</sup> | FI | Dist. of gaseous fuels                | 0.23% | 9.43<br>10 <sup>-5</sup> | FI | Dist. of gaseous fuels                | 0.23% | 4.02<br>10 <sup>-5</sup> | FI | Dist. of gaseous fuels                | 0.22% | 1.25<br>10 <sup>-5</sup> |

c) Georgia

Table 61: Carbon Footprint Distribution of Bitcoin mining in Georgia per transaction by country

| Order | Total GWP per year (MtCO <sub>2</sub> -eqv.) |             |        |      |             |        |      |             |        |      |             |                       |      |             |                       |      |             |                       |
|-------|----------------------------------------------|-------------|--------|------|-------------|--------|------|-------------|--------|------|-------------|-----------------------|------|-------------|-----------------------|------|-------------|-----------------------|
|       | 2020                                         |             |        | 2019 |             |        | 2018 |             |        | 2017 |             |                       | 2016 |             |                       | 2015 |             |                       |
|       | C.C.                                         | P.A.D.* (%) | GWP    | C.C. | P.A.D.* (%) | GWP    | C.C. | P.A.D.* (%) | GWP    | C.C. | P.A.D.* (%) | GWP                   | C.C. | P.A.D.* (%) | GWP                   | C.C. | P.A.D.* (%) | GWP                   |
| 1     | CN                                           | 51.29%      | 48.417 | WE   | 47.17%      | 25.911 | GE   | 48.65%      | 21.981 | GE   | 54.51%      | 3.839                 | GE   | 54.87%      | 1.197                 | CN   | 90.38%      | 4.07 10 <sup>-1</sup> |
| 2     | GE                                           | 41.83%      | 39.482 | CN   | 46.28%      | 25.423 | CN   | 44.90%      | 20.289 | CN   | 39.41%      | 2.776                 | CN   | 39.08%      | 8.53 10 <sup>-1</sup> | JP   | 1.45%       | 6.67 10 <sup>-3</sup> |
| 3     | WA                                           | 0.90%       | 0.850  | WA   | 0.84%       | 0.463  | WA   | 0.83%       | 0.374  | RU   | 0.84%       | 5.94 10 <sup>-2</sup> | RU   | 0.85%       | 1.85 10 <sup>-2</sup> | WA   | 1.35%       | 7.65 10 <sup>-3</sup> |
| 4     | JP                                           | 0.83%       | 0.788  | RU   | 0.80%       | 0.437  | RU   | 0.81%       | 0.364  | WA   | 0.76%       | 5.38 10 <sup>-2</sup> | WA   | 0.76%       | 1.66 10 <sup>-2</sup> | KR   | 1.12%       | 5.36 10 <sup>-3</sup> |
| 5     | RU                                           | 0.76%       | 0.719  | JP   | 0.76%       | 0.415  | JP   | 0.73%       | 0.332  | JP   | 0.65%       | 4.56 10 <sup>-2</sup> | JP   | 0.64%       | 1.4 10 <sup>-2</sup>  | US   | 1.03%       | 5.88 10 <sup>-3</sup> |
| 6     | WM                                           | 0.71%       | 0.674  | WM   | 0.68%       | 0.371  | WM   | 0.66%       | 0.300  | WM   | 0.62%       | 4.37 10 <sup>-2</sup> | WM   | 0.62%       | 1.35 10 <sup>-2</sup> | WM   | 1.02%       | 6.17 10 <sup>-3</sup> |
| 7     | US                                           | 0.69%       | 0.653  | US   | 0.65%       | 0.356  | US   | 0.64%       | 0.287  | US   | 0.59%       | 4.14 10 <sup>-2</sup> | US   | 0.59%       | 1.28 10 <sup>-2</sup> | DE   | 0.68%       | 3.69 10 <sup>-3</sup> |
| 8     | KR                                           | 0.66%       | 0.625  | KR   | 0.60%       | 0.332  | KR   | 0.59%       | 0.266  | KR   | 0.52%       | 3.69 10 <sup>-2</sup> | KR   | 0.52%       | 1.14 10 <sup>-2</sup> | RU   | 0.49%       | 7.83 10 <sup>-3</sup> |
| 9     | DE                                           | 0.44%       | 0.415  | DE   | 0.41%       | 0.224  | DE   | 0.40%       | 0.181  | DE   | 0.37%       | 2.58 10 <sup>-2</sup> | DE   | 0.36%       | 7.95 10 <sup>-3</sup> | IN   | 0.31%       | 1.85 10 <sup>-3</sup> |



|    |    |       |       |    |       |       |    |       |       |    |       |                       |    |       |                       |    |       |                       |
|----|----|-------|-------|----|-------|-------|----|-------|-------|----|-------|-----------------------|----|-------|-----------------------|----|-------|-----------------------|
| 10 | IN | 0.22% | 0.203 | IN | 0.20% | 0.111 | IN | 0.20% | 0.090 | IN | 0.19% | 1.31 10 <sup>-2</sup> | IN | 0.19% | 4.05 10 <sup>-3</sup> | ID | 0.25% | 1.18 10 <sup>-3</sup> |
|----|----|-------|-------|----|-------|-------|----|-------|-------|----|-------|-----------------------|----|-------|-----------------------|----|-------|-----------------------|

Table 62: Carbon Footprint Distribution of Bitcoin mining in Georgia per transaction by sector in Supply Chain

| O. | GWP per transaction per year (kgCO <sub>2</sub> -eqv.) |                            |             |        |      |                            |             |        |      |                            |             |        |      |                            |             |       |      |                            |             |                       |      |                            |             |                       |
|----|--------------------------------------------------------|----------------------------|-------------|--------|------|----------------------------|-------------|--------|------|----------------------------|-------------|--------|------|----------------------------|-------------|-------|------|----------------------------|-------------|-----------------------|------|----------------------------|-------------|-----------------------|
|    | 2020                                                   |                            |             |        | 2019 |                            |             |        | 2018 |                            |             |        | 2017 |                            |             |       | 2016 |                            |             |                       | 2015 |                            |             |                       |
|    | C.C.                                                   | Sector                     | P.A.D.* (%) | GWP    | C.C. | Sector                     | P.A.D.* (%) | GWP    | C.C. | Sector                     | P.A.D.* (%) | GWP    | C.C. | Sector                     | P.A.D.* (%) | GWP   | C.C. | Sector                     | P.A.D.* (%) | GWP                   | C.C. | Sector                     | P.A.D.* (%) | GWP                   |
| 1  | GE                                                     | Elec. Gas                  | 34.05%      | 32.138 | GE   | Elec. Gas                  | 38.41%      | 21.096 | GE   | Elec. Gas                  | 39.61%      | 17.898 | GE   | Elec. Gas                  | 44.39%      | 3.127 | GE   | Elec. Gas                  | 44.68%      | 9.75 10 <sup>-1</sup> | GE   | Elec. Gas                  | 41.54%      | 3.96 10 <sup>-1</sup> |
| 2  | CN                                                     | Elec. Coal                 | 29.27%      | 27.625 | CN   | Elec. Coal                 | 26.40%      | 14.502 | CN   | Elec. Coal                 | 25.61%      | 11.573 | CN   | Elec. Coal                 | 22.47%      | 1.583 | CN   | Elec. Coal                 | 22.28%      | 4.86 10 <sup>-1</sup> | CN   | Elec. Coal                 | 24.35%      | 2.32 10 <sup>-1</sup> |
| 3  | CN                                                     | Iron and Steel             | 6.54%       | 6.178  | CN   | Iron and Steel             | 5.91%       | 3.245  | CN   | Iron and Steel             | 5.73%       | 2.590  | CN   | Iron and Steel             | 5.03%       | 0.354 | CN   | Iron and Steel             | 4.99%       | 1.09 10 <sup>-1</sup> | CN   | Iron and Steel             | 5.45%       | 5.20 10 <sup>-2</sup> |
| 4  | CN                                                     | Steam-Hot W. Sply.         | 2.75%       | 2.597  | CN   | Steam-Hot W. Sply.         | 2.48%       | 1.363  | WE   | Dist. of gaseous fuels     | 2.52%       | 1.137  | WE   | Dist. of gaseous fuels     | 2.82%       | 0.199 | WE   | Dist. of gaseous fuels     | 2.84%       | 6.20 10 <sup>-2</sup> | WE   | Dist. of gaseous fuels     | 2.64%       | 2.52 10 <sup>-2</sup> |
| 5  | WE                                                     | Dist. of gaseous fuels     | 2.16%       | 2.042  | WE   | Dist. of gaseous fuels     | 2.44%       | 1.340  | CN   | Steam-Hot W. Sply.         | 2.41%       | 1.088  | WE   | Elec. Coal                 | 2.24%       | 0.157 | GE   | Elec. Coal                 | 2.25%       | 4.91 10 <sup>-2</sup> | CN   | Steam-Hot W. Sply.         | 2.29%       | 2.18 10 <sup>-2</sup> |
| 6  | GE                                                     | Elec. Coal                 | 1.72%       | 1.623  | GE   | Elec. Coal                 | 1.94%       | 1.064  | GE   | Elec. Coal                 | 2.00%       | 0.902  | CN   | Steam-Hot W. Sply          | 2.11%       | 0.149 | CN   | Steam-Hot W. Sply.         | 2.10%       | 4.57 10 <sup>-2</sup> | GE   | Elec. Coal                 | 2.09%       | 2.00 10 <sup>-2</sup> |
| 7  | CN                                                     | O. Machinery and Computers | 1.62%       | 1.531  | GE   | Steam-Hot W. Sply.         | 1.62%       | 0.891  | GE   | Steam-Hot W. Sply.         | 1.67%       | 0.755  | GE   | Steam-Hot W. Sply          | 1.87%       | 0.132 | GE   | Steam-Hot W. Sply.         | 1.88%       | 4.11 10 <sup>-2</sup> | GE   | Steam-Hot W. Sply.         | 1.75%       | 1.67 10 <sup>-2</sup> |
| 8  | CN                                                     | Rubber and plastic         | 1.59%       | 1.505  | CN   | O. Machinery and Computers | 1.46%       | 0.803  | CN   | O. Machinery and Computers | 1.42%       | 0.641  | CN   | O. Machinery and Computers | 1.24%       | 0.088 | CN   | O. Machinery and Computers | 1.23%       | 2.69 10 <sup>-2</sup> | CN   | O. Machinery and Computers | 1.35%       | 1.29 10 <sup>-2</sup> |
| 9  | GE                                                     | Steam-Hot W. Sply.         | 1.44%       | 1.359  | CN   | Rubber and plastic         | 1.44%       | 0.790  | CN   | Rubber and plastic         | 1.40%       | 0.631  | CN   | Rubber and plastic         | 1.23%       | 0.086 | CN   | Rubber and plastic         | 1.22%       | 2.65 10 <sup>-2</sup> | CN   | Rubber and plastic         | 1.33%       | 1.27 10 <sup>-2</sup> |
| 10 | CN                                                     | Chemicals nec              | 1.16%       | 1.090  | CN   | Chemicals nec              | 1.04%       | 0.573  | GE   | Electricity by hydro       | 1.04%       | 0.468  | GE   | Electricity by hydro       | 1.16%       | 0.082 | GE   | Electricity by hydro       | 1.17%       | 2.55 10 <sup>-2</sup> | GE   | Electricity by hydro       | 1.09%       | 1.04 10 <sup>-2</sup> |
| 11 | GE                                                     | Electricity by hydro       | 0.89%       | 0.840  | GE   | Electricity by hydro       | 1.00%       | 0.551  | CN   | Chemicals nec              | 1.01%       | 0.457  | CN   | Chemicals nec              | 0.89%       | 0.063 | CN   | Chemicals nec              | 0.88%       | 1.92 10 <sup>-2</sup> | CN   | Chemicals nec              | 0.96%       | 9.17 10 <sup>-3</sup> |
| 12 | CN                                                     | Air transport services     | 0.75%       | 0.704  | CN   | Air transport services     | 0.67%       | 0.370  | CN   | Air transport services     | 0.65%       | 0.295  | CN   | Air transport services     | 0.57%       | 0.040 | CN   | Air transport services     | 0.57%       | 1.24 10 <sup>-2</sup> | CN   | Air transport services     | 0.62%       | 5.93 10 <sup>-3</sup> |
| 13 | CN                                                     | Bituminous Coal            | 0.73%       | 0.684  | CN   | Bituminous Coal            | 0.65%       | 0.359  | CN   | Bituminous Coal            | 0.63%       | 0.287  | CN   | Bituminous Coal            | 0.56%       | 0.039 | CN   | Bituminous Coal            | 0.55%       | 1.21 10 <sup>-2</sup> | CN   | Bituminous Coal            | 0.60%       | 5.76 10 <sup>-3</sup> |
| 14 | CN                                                     | Other mineral products     | 0.66%       | 0.621  | CN   | Other mineral products     | 0.59%       | 0.327  | CN   | Other mineral products     | 0.58%       | 0.261  | CN   | Other mineral products     | 0.51%       | 0.036 | CN   | Other mineral products     | 0.50%       | 1.10 10 <sup>-2</sup> | CN   | Other mineral products     | 0.55%       | 5.24 10 <sup>-3</sup> |
| 15 | CN                                                     | Supporting transport       | 0.46%       | 0.434  | CN   | Supporting transport       | 0.42%       | 0.228  | CN   | Supporting transport       | 0.40%       | 0.182  | CN   | Supporting transport       | 0.35%       | 0.025 | CN   | Supporting transport       | 0.35%       | 7.64 10 <sup>-3</sup> | CN   | Supporting transport       | 0.38%       | 3.65 10 <sup>-3</sup> |
| 16 | CN                                                     | Elec. Gas                  | 0.40%       | 0.380  | CN   | Elec. Gas                  | 0.36%       | 0.199  | CN   | Elec. Gas                  | 0.35%       | 0.159  | GE   | Construction work (45)     | 0.33%       | 0.023 | GE   | Construction work (45)     | 0.34%       | 7.32 10 <sup>-3</sup> | CN   | Elec. Gas                  | 0.34%       | 3.19 10 <sup>-3</sup> |
| 17 | CN                                                     | Inland transportation      | 0.36%       | 0.340  | CN   | Inland transportation      | 0.33%       | 0.179  | CN   | Inland transportation      | 0.32%       | 0.143  | CN   | Elec. Gas                  | 0.31%       | 0.022 | CN   | Elec. Gas                  | 0.31%       | 6.69 10 <sup>-3</sup> | GE   | Construction work (45)     | 0.31%       | 2.97 10 <sup>-3</sup> |
| 18 | CN                                                     | Sea transportation         | 0.31%       | 0.296  | GE   | Construction work (45)     | 0.29%       | 0.158  | GE   | Construction work (45)     | 0.30%       | 0.134  | CN   | Inland transportation      | 0.28%       | 0.019 | CN   | Inland transportation      | 0.27%       | 5.99 10 <sup>-3</sup> | CN   | Inland transportation      | 0.30%       | 2.86 10 <sup>-3</sup> |
| 19 | CN                                                     | Coke Oven                  | 0.29%       | 0.273  | CN   | Sea transportation         | 0.28%       | 0.156  | CN   | Sea transportation         | 0.27%       | 0.124  | CN   | Sea transportation         | 0.24%       | 0.017 | CN   | Sea transportation         | 0.24%       | 5.22 10 <sup>-3</sup> | CN   | Sea transportation         | 0.26%       | 2.49 10 <sup>-3</sup> |
| 20 | CN                                                     | Paper products             | 0.27%       | 0.256  | CN   | Coke Oven                  | 0.26%       | 0.143  | CN   | Coke Oven                  | 0.25%       | 0.114  | CN   | Coke Oven                  | 0.22%       | 0.016 | CN   | Coke Oven                  | 0.22%       | 4.81 10 <sup>-3</sup> | CN   | Coke Oven                  | 0.24%       | 2.30 10 <sup>-3</sup> |

Table 63: Total Annual Carbon Footprint Distribution of Bitcoin mining in Georgia by country

| Order | Total GWP per year (MtCO <sub>2</sub> -eqv.) |             |                       |      |             |                       |      |             |                       |      |             |                       |      |             |                       |      |             |                       |
|-------|----------------------------------------------|-------------|-----------------------|------|-------------|-----------------------|------|-------------|-----------------------|------|-------------|-----------------------|------|-------------|-----------------------|------|-------------|-----------------------|
|       | 2020                                         |             |                       | 2019 |             |                       | 2018 |             |                       | 2017 |             |                       | 2016 |             |                       | 2015 |             |                       |
|       | C.C.                                         | P.A.D.* (%) | GWP                   | C.C. | P.A.D.* (%) | GWP                   | C.C. | P.A.D.* (%) | GWP                   | C.C. | P.A.D.* (%) | GWP                   | C.C. | P.A.D.* (%) | GWP                   | C.C. | P.A.D.* (%) | GWP                   |
| 1     | CN                                           | 51.29%      | 1.49 10 <sup>-2</sup> | GE   | 47.17%      | 5.47 10 <sup>-2</sup> | GE   | 48.65%      | 1.63 10 <sup>-2</sup> | GE   | 54.51%      | 7.53 10 <sup>-3</sup> | GE   | 54.87%      | 3.21 10 <sup>-3</sup> | CN   | 90.38%      | 8.38 10 <sup>-4</sup> |
| 2     | GE                                           | 41.83%      | 1.21 10 <sup>-2</sup> | CN   | 46.28%      | 5.37 10 <sup>-2</sup> | CN   | 44.90%      | 1.5 10 <sup>-2</sup>  | CN   | 39.41%      | 5.45 10 <sup>-3</sup> | CN   | 39.08%      | 2.29 10 <sup>-3</sup> | JP   | 1.45%       | 1.37 10 <sup>-5</sup> |
| 3     | WA                                           | 0.90%       | 2.61 10 <sup>-4</sup> | WA   | 0.84%       | 9.78 10 <sup>-4</sup> | WA   | 0.83%       | 2.76 10 <sup>-4</sup> | RU   | 0.84%       | 1.16 10 <sup>-4</sup> | RU   | 0.85%       | 4.95 10 <sup>-5</sup> | WA   | 1.35%       | 1.57 10 <sup>-5</sup> |
| 4     | JP                                           | 0.83%       | 2.42 10 <sup>-4</sup> | RU   | 0.80%       | 9.23 10 <sup>-4</sup> | RU   | 0.81%       | 2.69 10 <sup>-4</sup> | WA   | 0.76%       | 1.06 10 <sup>-4</sup> | WA   | 0.76%       | 4.45 10 <sup>-5</sup> | KR   | 1.12%       | 1.1 10 <sup>-5</sup>  |
| 5     | RU                                           | 0.76%       | 2.21 10 <sup>-4</sup> | JP   | 0.76%       | 8.77 10 <sup>-4</sup> | JP   | 0.73%       | 2.45 10 <sup>-4</sup> | JP   | 0.65%       | 8.95 10 <sup>-5</sup> | JP   | 0.64%       | 3.76 10 <sup>-5</sup> | US   | 1.03%       | 1.21 10 <sup>-5</sup> |
| 6     | WM                                           | 0.71%       | 2.07 10 <sup>-4</sup> | WM   | 0.68%       | 7.82 10 <sup>-4</sup> | WM   | 0.66%       | 2.22 10 <sup>-4</sup> | WM   | 0.62%       | 8.58 10 <sup>-5</sup> | WM   | 0.62%       | 3.62 10 <sup>-5</sup> | WM   | 1.02%       | 1.27 10 <sup>-5</sup> |
| 7     | US                                           | 0.69%       | 2.01 10 <sup>-4</sup> | US   | 0.65%       | 7.52 10 <sup>-4</sup> | US   | 0.64%       | 2.12 10 <sup>-4</sup> | US   | 0.59%       | 8.13 10 <sup>-5</sup> | US   | 0.59%       | 3.43 10 <sup>-5</sup> | DE   | 0.68%       | 7.59 10 <sup>-6</sup> |
| 8     | KR                                           | 0.66%       | 1.92 10 <sup>-4</sup> | KR   | 0.60%       | 7.01 10 <sup>-4</sup> | KR   | 0.59%       | 1.96 10 <sup>-4</sup> | KR   | 0.52%       | 7.24 10 <sup>-5</sup> | KR   | 0.52%       | 3.04 10 <sup>-5</sup> | RU   | 0.49%       | 1.61 10 <sup>-5</sup> |
| 9     | DE                                           | 0.44%       | 1.28 10 <sup>-4</sup> | DE   | 0.41%       | 4.74 10 <sup>-4</sup> | DE   | 0.40%       | 1.34 10 <sup>-4</sup> | DE   | 0.37%       | 5.06 10 <sup>-5</sup> | DE   | 0.36%       | 2.13 10 <sup>-5</sup> | IN   | 0.31%       | 3.81 10 <sup>-6</sup> |
| 10    | IN                                           | 0.22%       | 6.23 10 <sup>-5</sup> | IN   | 0.20%       | 2.35 10 <sup>-4</sup> | IN   | 0.20%       | 6.66 10 <sup>-5</sup> | IN   | 0.19%       | 2.58 10 <sup>-5</sup> | IN   | 0.19%       | 1.09 10 <sup>-5</sup> | ID   | 0.25%       | 2.43 10 <sup>-6</sup> |

Table 64: Total Annual Carbon Footprint Distribution of Bitcoin mining in Georgia by sector

| O. | Total GWP per year (MtCO <sub>2</sub> -eqv.) |                            |             |                       |      |                            |             |                       |      |                            |             |                       |      |                            |             |                       |      |                            |             |                       |      |                            |             |                       |
|----|----------------------------------------------|----------------------------|-------------|-----------------------|------|----------------------------|-------------|-----------------------|------|----------------------------|-------------|-----------------------|------|----------------------------|-------------|-----------------------|------|----------------------------|-------------|-----------------------|------|----------------------------|-------------|-----------------------|
|    | 2020                                         |                            |             |                       | 2019 |                            |             |                       | 2018 |                            |             |                       | 2017 |                            |             |                       | 2016 |                            |             |                       | 2015 |                            |             |                       |
|    | C.C.                                         | Sector                     | P.A.D.* (%) | GWP                   | C.C. | Sector                     | P.A.D.* (%) | GWP                   | C.C. | Sector                     | P.A.D.* (%) | GWP                   | C.C. | Sector                     | P.A.D.* (%) | GWP                   | C.C. | Sector                     | P.A.D.* (%) | GWP                   | C.C. | Sector                     | P.A.D.* (%) | GWP                   |
| 1  | GE                                           | Elec. Gas                  | 34.05%      | 9.88 10 <sup>-3</sup> | GE   | Elec. Gas                  | 38.41%      | 4.46 10 <sup>-2</sup> | GE   | Elec. Gas                  | 39.61%      | 1.32 10 <sup>-2</sup> | GE   | Elec. Gas                  | 44.39%      | 6.13 10 <sup>-3</sup> | GE   | Elec. Gas                  | 44.68%      | 2.61 10 <sup>-3</sup> | GE   | Elec. Gas                  | 41.54%      | 8.16 10 <sup>-4</sup> |
| 2  | CN                                           | Elec. Coal                 | 29.27%      | 8.50 10 <sup>-3</sup> | CN   | Elec. Coal                 | 26.40%      | 3.06 10 <sup>-2</sup> | CN   | Elec. Coal                 | 25.61%      | 8.56 10 <sup>-3</sup> | CN   | Elec. Coal                 | 22.47 %     | 3.11 10 <sup>-3</sup> | CN   | Elec. Coal                 | 22.28%      | 1.30 10 <sup>-3</sup> | CN   | Elec. Coal                 | 24.35%      | 4.78 10 <sup>-4</sup> |
| 3  | CN                                           | Iron and Steel             | 6.54%       | 1.90 10 <sup>-3</sup> | CN   | Iron and Steel             | 5.91%       | 6.85 10 <sup>-3</sup> | CN   | Iron and Steel             | 5.73%       | 1.91 10 <sup>-3</sup> | CN   | Iron and Steel             | 5.03%       | 6.95 10 <sup>-4</sup> | CN   | Iron and Steel             | 4.99%       | 2.92 10 <sup>-4</sup> | CN   | Iron and Steel             | 5.45%       | 1.07 10 <sup>-4</sup> |
| 4  | CN                                           | Steam-Hot W. Sply.         | 2.75%       | 7.99 10 <sup>-4</sup> | CN   | Steam-Hot W. Sply.         | 2.48%       | 2.88 10 <sup>-3</sup> | GE   | Dist. of gaseous fuels     | 2.52%       | 8.41 10 <sup>-4</sup> | GE   | Dist. of gaseous fuels     | 2.82%       | 3.90 10 <sup>-4</sup> | GE   | Dist. of gaseous fuels     | 2.84%       | 1.66 10 <sup>-4</sup> | GE   | Dist. of gaseous fuels     | 2.64%       | 5.18 10 <sup>-5</sup> |
| 5  | GE                                           | Dist. of gaseous fuels     | 2.16%       | 6.28 10 <sup>-4</sup> | GE   | Dist. of gaseous fuels     | 2.44%       | 2.83 10 <sup>-3</sup> | CN   | Steam-Hot W. Sply.         | 2.41%       | 8.04 10 <sup>-4</sup> | GE   | Elec. Coal                 | 2.24%       | 3.09 10 <sup>-4</sup> | GE   | Elec. Coal                 | 2.25%       | 1.32 10 <sup>-4</sup> | CN   | Steam-Hot W. Sply.         | 2.29%       | 4.49 10 <sup>-5</sup> |
| 6  | GE                                           | Elec. Coal                 | 1.72%       | 4.99 10 <sup>-4</sup> | GE   | Elec. Coal                 | 1.94%       | 2.25 10 <sup>-3</sup> | GE   | Elec. Coal                 | 2.00%       | 6.67 10 <sup>-4</sup> | CN   | Steam-Hot W. Sply          | 2.11%       | 2.92 10 <sup>-4</sup> | CN   | Steam-Hot W. Sply.         | 2.10%       | 1.23 10 <sup>-4</sup> | GE   | Elec. Coal                 | 2.09%       | 4.11 10 <sup>-5</sup> |
| 7  | CN                                           | O. Machinery and Computers | 1.62%       | 4.71 10 <sup>-4</sup> | GE   | Steam-Hot W. Sply.         | 1.62%       | 1.88 10 <sup>-3</sup> | GE   | Steam-Hot W. Sply.         | 1.67%       | 5.58 10 <sup>-4</sup> | GE   | Steam-Hot W. Sply          | 1.87%       | 2.59 10 <sup>-4</sup> | GE   | Steam-Hot W. Sply.         | 1.88%       | 1.10 10 <sup>-4</sup> | GE   | Steam-Hot W. Sply.         | 1.75%       | 3.44 10 <sup>-5</sup> |
| 8  | CN                                           | Rubber and plastic         | 1.59%       | 4.63 10 <sup>-4</sup> | CN   | O. Machinery and Computers | 1.46%       | 1.70 10 <sup>-3</sup> | CN   | O. Machinery and Computers | 1.42%       | 4.74 10 <sup>-4</sup> | CN   | O. Machinery and Computers | 1.24%       | 1.72 10 <sup>-4</sup> | CN   | O. Machinery and Computers | 1.23%       | 7.21 10 <sup>-5</sup> | CN   | O. Machinery and Computers | 1.35%       | 2.64 10 <sup>-5</sup> |
| 9  | GE                                           | Steam-Hot W. Sply.         | 1.44%       | 4.18 10 <sup>-4</sup> | CN   | Rubber and plastic         | 1.44%       | 1.67 10 <sup>-3</sup> | CN   | Rubber and plastic         | 1.40%       | 4.66 10 <sup>-4</sup> | CN   | Rubber and plastic         | 1.23%       | 1.69 10 <sup>-4</sup> | CN   | Rubber and plastic         | 1.22%       | 7.11 10 <sup>-5</sup> | CN   | Rubber and plastic         | 1.33%       | 2.61 10 <sup>-5</sup> |
| 10 | CN                                           | Chemicals nec              | 1.16%       | 3.35 10 <sup>-4</sup> | CN   | Chemicals nec              | 1.04%       | 1.21 10 <sup>-3</sup> | GE   | Electricity by hydro       | 1.04%       | 3.46 10 <sup>-4</sup> | GE   | Electricity by hydro       | 1.16%       | 1.60 10 <sup>-4</sup> | GE   | Electricity by hydro       | 1.17%       | 6.84 10 <sup>-5</sup> | GE   | Electricity by hydro       | 1.09%       | 2.13 10 <sup>-5</sup> |
| 11 | GE                                           | Electricity by hydro       | 0.89%       | 2.58 10 <sup>-4</sup> | GE   | Electricity by hydro       | 1.00%       | 1.16 10 <sup>-3</sup> | CN   | Chemicals nec              | 1.01%       | 3.38 10 <sup>-4</sup> | CN   | Chemicals nec              | 0.89%       | 1.23 10 <sup>-4</sup> | CN   | Chemicals nec              | 0.88%       | 5.15 10 <sup>-5</sup> | CN   | Chemicals nec              | 0.96%       | 1.89 10 <sup>-5</sup> |

|    |    |                        |       |                       |    |                         |       |                       |    |                         |       |                       |    |                         |       |                       |    |                         |       |                       |    |                         |       |                       |
|----|----|------------------------|-------|-----------------------|----|-------------------------|-------|-----------------------|----|-------------------------|-------|-----------------------|----|-------------------------|-------|-----------------------|----|-------------------------|-------|-----------------------|----|-------------------------|-------|-----------------------|
| 12 | CN | Air transport services | 0.75% | 2.17 10 <sup>-4</sup> | CN | Air transport services  | 0.67% | 7.82 10 <sup>-4</sup> | CN | Air transport services  | 0.65% | 2.18 10 <sup>-4</sup> | CN | Air transport services  | 0.57% | 7.94 10 <sup>-5</sup> | CN | Air transport services  | 0.57% | 3.33 10 <sup>-5</sup> | CN | Air transport services  | 0.62% | 1.22 10 <sup>-5</sup> |
| 13 | CN | Bituminous Coal        | 0.73% | 2.10 10 <sup>-4</sup> | CN | Bituminous Coal         | 0.65% | 7.59 10 <sup>-4</sup> | CN | Bituminous Coal         | 0.63% | 2.12 10 <sup>-4</sup> | CN | Bituminous Coal         | 0.56% | 7.70 10 <sup>-5</sup> | CN | Bituminous Coal         | 0.55% | 3.23 10 <sup>-5</sup> | CN | Bituminous Coal         | 0.60% | 1.18 10 <sup>-5</sup> |
| 14 | CN | Other mineral products | 0.66% | 1.91 10 <sup>-4</sup> | CN | Other mineral products  | 0.59% | 6.89 10 <sup>-4</sup> | CN | Other mineral products  | 0.58% | 1.93 10 <sup>-4</sup> | CN | Other mineral products  | 0.51% | 7.01 10 <sup>-5</sup> | CN | Other mineral products  | 0.50% | 2.94 10 <sup>-5</sup> | CN | Other mineral products  | 0.55% | 1.08 10 <sup>-5</sup> |
| 15 | CN | Supporting transport   | 0.46% | 1.34 10 <sup>-4</sup> | CN | Supporting transport    | 0.42% | 4.81 10 <sup>-4</sup> | CN | Supporting transport    | 0.40% | 1.35 10 <sup>-4</sup> | CN | Supporting transport    | 0.35% | 4.88 10 <sup>-5</sup> | CN | Supporting transport    | 0.35% | 2.05 10 <sup>-5</sup> | CN | Supporting transport    | 0.38% | 7.51 10 <sup>-6</sup> |
| 16 | CN | Elec. Gas              | 0.40% | 1.17 10 <sup>-4</sup> | CN | Elec. Gas               | 0.36% | 4.21 10 <sup>-4</sup> | CN | Elec. Gas               | 0.35% | 1.18 10 <sup>-4</sup> | GE | Constructio n work (45) | 0.33% | 4.60 10 <sup>-5</sup> | GE | Constructio n work (45) | 0.34% | 1.96 10 <sup>-5</sup> | CN | Elec. Gas               | 0.34% | 6.57 10 <sup>-6</sup> |
| 17 | CN | Inland transportati on | 0.36% | 1.05 10 <sup>-4</sup> | CN | Inland transportati on  | 0.33% | 3.77 10 <sup>-4</sup> | CN | Inland transportati on  | 0.32% | 1.05 10 <sup>-4</sup> | CN | Elec. Gas               | 0.31% | 4.27 10 <sup>-5</sup> | CN | Elec. Gas               | 0.31% | 1.79 10 <sup>-5</sup> | GE | Constructio n work (45) | 0.31% | 6.12 10 <sup>-6</sup> |
| 18 | CN | Sea transportati on    | 0.31% | 9.11 10 <sup>-5</sup> | GE | Constructio n work (45) | 0.29% | 3.34 10 <sup>-4</sup> | GE | Constructio n work (45) | 0.30% | 9.93 10 <sup>-5</sup> | CN | Inland transportati on  | 0.28% | 3.82 10 <sup>-5</sup> | CN | Inland transportati on  | 0.27% | 1.61 10 <sup>-5</sup> | CN | Inland transportati on  | 0.30% | 5.89 10 <sup>-6</sup> |
| 19 | CN | Coke Oven              | 0.29% | 8.40 10 <sup>-5</sup> | CN | Sea transportati on     | 0.28% | 3.28 10 <sup>-4</sup> | CN | Sea transportati on     | 0.27% | 9.18 10 <sup>-5</sup> | CN | Sea transportati on     | 0.24% | 3.33 10 <sup>-5</sup> | CN | Sea transportati on     | 0.24% | 1.40 10 <sup>-5</sup> | CN | Sea transportati on     | 0.26% | 5.13 10 <sup>-6</sup> |
| 20 | CN | Paper products         | 0.27% | 7.87 10 <sup>-5</sup> | CN | Coke Oven               | 0.26% | 3.03 10 <sup>-4</sup> | CN | Coke Oven               | 0.25% | 8.46 10 <sup>-5</sup> | CN | Coke Oven               | 0.22% | 3.07 10 <sup>-5</sup> | CN | Coke Oven               | 0.22% | 1.29 10 <sup>-5</sup> | CN | Coke Oven               | 0.24% | 4.73 10 <sup>-6</sup> |

d) Iceland

Table 65: Carbon Footprint Distribution of Bitcoin mining in Iceland per transaction by country

| Order | GWP per transaction per year (kgCO <sub>2</sub> -eqv.) |             |        |      |             |        |      |             |        |      |             |                       |      |             |                       |      |             |                       |
|-------|--------------------------------------------------------|-------------|--------|------|-------------|--------|------|-------------|--------|------|-------------|-----------------------|------|-------------|-----------------------|------|-------------|-----------------------|
|       | 2020                                                   |             |        | 2019 |             |        | 2018 |             |        | 2017 |             |                       | 2016 |             |                       | 2015 |             |                       |
|       | C.C.                                                   | P.A.D.* (%) | GWP    | C.C. | P.A.D.* (%) | GWP    | C.C. | P.A.D.* (%) | GWP    | C.C. | P.A.D.* (%) | GWP                   | C.C. | P.A.D.* (%) | GWP                   | C.C. | P.A.D.* (%) | GWP                   |
| 1     | CN                                                     | 78.47%      | 48.586 | CN   | 75.98%      | 25.534 | CN   | 75.22%      | 20.383 | CN   | 71.90%      | 2.792                 | CN   | 71.68%      | 8.58 10 <sup>-1</sup> | CN   | 73.95%      | 4.09 10 <sup>-1</sup> |
| 2     | IS                                                     | 9.28%       | 5.748  | IS   | 11.21%      | 3.766  | IS   | 11.79%      | 3.194  | IS   | 14.35%      | 5.57 10 <sup>-1</sup> | IS   | 14.52%      | 1.74 10 <sup>-1</sup> | IS   | 12.77%      | 7.07 10 <sup>-2</sup> |
| 3     | WA                                                     | 1.62%       | 1.003  | RU   | 1.77%       | 0.595  | RU   | 1.84%       | 0.498  | RU   | 2.13%       | 8.28 10 <sup>-2</sup> | RU   | 2.15%       | 2.58 10 <sup>-2</sup> | RU   | 1.95%       | 1.08 10 <sup>-2</sup> |
| 4     | RU                                                     | 1.55%       | 0.960  | WA   | 1.68%       | 0.564  | WA   | 1.69%       | 0.459  | WA   | 1.77%       | 6.87 10 <sup>-2</sup> | WA   | 1.77%       | 2.12 10 <sup>-2</sup> | WA   | 1.72%       | 9.53 10 <sup>-3</sup> |
| 5     | WM                                                     | 1.31%       | 0.808  | WM   | 1.37%       | 0.459  | WM   | 1.38%       | 0.375  | WM   | 1.46%       | 5.68 10 <sup>-2</sup> | WM   | 1.47%       | 1.76 10 <sup>-2</sup> | WM   | 1.41%       | 7.82 10 <sup>-3</sup> |
| 6     | JP                                                     | 1.29%       | 0.800  | JP   | 1.26%       | 0.423  | JP   | 1.25%       | 0.339  | JP   | 1.21%       | 4.69 10 <sup>-2</sup> | JP   | 1.20%       | 1.44 10 <sup>-2</sup> | JP   | 1.23%       | 6.83 10 <sup>-3</sup> |
| 7     | US                                                     | 1.14%       | 0.703  | US   | 1.16%       | 0.389  | US   | 1.16%       | 0.315  | US   | 1.19%       | 4.63 10 <sup>-2</sup> | US   | 1.19%       | 1.43 10 <sup>-2</sup> | US   | 1.17%       | 6.5 10 <sup>-3</sup>  |
| 8     | KR                                                     | 1.05%       | 0.649  | KR   | 1.03%       | 0.348  | KR   | 1.03%       | 0.279  | KR   | 1.01%       | 3.93 10 <sup>-2</sup> | KR   | 1.01%       | 1.21 10 <sup>-2</sup> | KR   | 1.02%       | 5.66 10 <sup>-3</sup> |
| 9     | DE                                                     | 0.74%       | 0.459  | DE   | 0.76%       | 0.254  | DE   | 0.76%       | 0.206  | DE   | 0.78%       | 3.01 10 <sup>-2</sup> | DE   | 0.78%       | 9.31 10 <sup>-3</sup> | DE   | 0.77%       | 4.24 10 <sup>-3</sup> |
| 10    | IN                                                     | 0.39%       | 0.244  | IN   | 0.41%       | 0.139  | IN   | 0.42%       | 0.113  | IN   | 0.44%       | 1.72 10 <sup>-2</sup> | IN   | 0.44%       | 5.31 10 <sup>-3</sup> | IN   | 0.43%       | 2.36 10 <sup>-3</sup> |

Table 66: Carbon Footprint Distribution of Bitcoin mining in Iceland per transaction by sector in Supply Chain

| O. | GWP per transaction per year (kgCO <sub>2</sub> -eqv.) |        |         |     |      |        |         |     |      |        |         |     |      |        |         |     |      |        |         |     |      |        |         |     |
|----|--------------------------------------------------------|--------|---------|-----|------|--------|---------|-----|------|--------|---------|-----|------|--------|---------|-----|------|--------|---------|-----|------|--------|---------|-----|
|    | 2020                                                   |        |         |     | 2019 |        |         |     | 2018 |        |         |     | 2017 |        |         |     | 2016 |        |         |     | 2015 |        |         |     |
|    | C.C.                                                   | Sector | P.A.D.* | GWP | C.C. | Sector | P.A.D.* | GWP | C.C. | Sector | P.A.D.* | GWP | C.C. | Sector | P.A.D.* | GWP | C.C. | Sector | P.A.D.* | GWP | C.C. | Sector | P.A.D.* | GWP |

|    |    |                            | (%)    |       |    |                            | (%)    |                          |    |                            | (%)    |                          |    |                            | (%)    |                          |    |                            | (%)    |                          |    | (%)                        |        |                          |
|----|----|----------------------------|--------|-------|----|----------------------------|--------|--------------------------|----|----------------------------|--------|--------------------------|----|----------------------------|--------|--------------------------|----|----------------------------|--------|--------------------------|----|----------------------------|--------|--------------------------|
| 1  | CN | Elec. Coal                 | 44.74% | 27.7  | CN | Elec. Coal                 | 43.30% | 14.552                   | CN | Elec. Coal                 | 42.86% | 11.615                   | CN | Elec. Coal                 | 40.95% | 1.59                     | CN | Elec. Coal                 | 40.82% | 4.89<br>10 <sup>-1</sup> | CN | Elec. Coal                 | 42.13% | 2.33<br>10 <sup>-1</sup> |
| 2  | CN | Iron and Steel             | 10.01% | 6.2   | CN | Iron and Steel             | 9.70%  | 3.259                    | CN | Iron and Steel             | 9.60%  | 2.602                    | CN | Iron and Steel             | 9.18%  | 3.57<br>10 <sup>-1</sup> | CN | Iron and Steel             | 9.16%  | 1.10<br>10 <sup>-1</sup> | CN | Iron and Steel             | 9.44%  | 5.23<br>10 <sup>-2</sup> |
| 3  | CN | Steam-Hot W. Sply.         | 4.21%  | 2.605 | CN | Steam-Hot W. Sply.         | 4.07%  | 1.368                    | CN | Steam-Hot W. Sply.         | 4.03%  | 1.092                    | IS | Electricity by hydro       | 4.06%  | 1.58<br>10 <sup>-1</sup> | IS | Electricity by hydro       | 4.11%  | 4.92<br>10 <sup>-2</sup> | CN | Steam-Hot W. Sply.         | 3.96%  | 2.19<br>10 <sup>-2</sup> |
| 4  | IS | Electricity by hydro       | 2.62%  | 1.620 | IS | Electricity by hydro       | 3.16%  | 1.063                    | IS | Electricity by hydro       | 3.33%  | 9.02<br>10 <sup>-1</sup> | CN | Steam-Hot W. Sply          | 3.85%  | 1.50<br>10 <sup>-1</sup> | CN | Steam-Hot W. Sply.         | 3.84%  | 4.59<br>10 <sup>-2</sup> | IS | Electricity by hydro       | 3.61%  | 2.00<br>10 <sup>-2</sup> |
| 5  | CN | O. Machinery and Computers | 2.47%  | 1.531 | CN | O. Machinery and Computers | 2.39%  | 8.03<br>10 <sup>-1</sup> | IS | Elec. Coal                 | 2.40%  | 6.50<br>10 <sup>-1</sup> | IS | Elec. Coal                 | 2.92%  | 1.13<br>10 <sup>-1</sup> | IS | Elec. Coal                 | 2.96%  | 3.54<br>10 <sup>-2</sup> | IS | Elec. Coal                 | 2.60%  | 1.44<br>10 <sup>-2</sup> |
| 6  | CN | Rubber and plastic         | 2.44%  | 1.512 | CN | Rubber and plastic         | 2.37%  | 7.95<br>10 <sup>-1</sup> | CN | O. Machinery and Computers | 2.36%  | 6.41<br>10 <sup>-1</sup> | CN | O. Machinery and Computers | 2.25%  | 8.75<br>10 <sup>-2</sup> | CN | O. Machinery and Computers | 2.25%  | 2.69<br>10 <sup>-2</sup> | CN | O. Machinery and Computers | 2.32%  | 1.29<br>10 <sup>-2</sup> |
| 7  | IS | Elec. Coal                 | 1.89%  | 1.170 | IS | Elec. Coal                 | 2.28%  | 7.67<br>10 <sup>-1</sup> | CN | Rubber and plastic         | 2.34%  | 6.35<br>10 <sup>-1</sup> | CN | Rubber and plastic         | 2.24%  | 8.70<br>10 <sup>-2</sup> | CN | Rubber and plastic         | 2.23%  | 2.67<br>10 <sup>-2</sup> | CN | Rubber and plastic         | 2.30%  | 1.27<br>10 <sup>-2</sup> |
| 8  | CN | Chemicals nec              | 1.77%  | 1.095 | CN | Chemicals nec              | 1.71%  | 5.75<br>10 <sup>-1</sup> | CN | Chemicals nec              | 1.70%  | 4.59<br>10 <sup>-1</sup> | IS | Dist. of gaseous fuels     | 1.69%  | 6.57<br>10 <sup>-2</sup> | IS | Dist. of gaseous fuels     | 1.71%  | 2.05<br>10 <sup>-2</sup> | CN | Chemicals nec              | 1.67%  | 9.23<br>10 <sup>-3</sup> |
| 9  | CN | Air transport services     | 1.14%  | 0.707 | IS | Dist. of gaseous fuels     | 1.32%  | 4.44<br>10 <sup>-1</sup> | IS | Dist. of gaseous fuels     | 1.39%  | 3.76<br>10 <sup>-1</sup> | CN | Chemicals nec              | 1.62%  | 6.30<br>10 <sup>-2</sup> | CN | Chemicals nec              | 1.62%  | 1.93<br>10 <sup>-2</sup> | IS | Dist. of gaseous fuels     | 1.51%  | 8.33<br>10 <sup>-3</sup> |
| 10 | CN | Bituminous Coal            | 1.11%  | 0.687 | IS | Steam-Hot W. Sply.         | 1.17%  | 3.91<br>10 <sup>-1</sup> | IS | Steam-Hot W. Sply.         | 1.23%  | 3.32<br>10 <sup>-1</sup> | IS | Steam-Hot W. Sply          | 1.49%  | 5.78<br>10 <sup>-2</sup> | IS | Steam-Hot W. Sply.         | 1.51%  | 1.80<br>10 <sup>-2</sup> | IS | Steam-Hot W. Sply.         | 1.33%  | 7.34<br>10 <sup>-3</sup> |
| 11 | IS | Dist. of gaseous fuels     | 1.09%  | 0.676 | CN | Air transport services     | 1.11%  | 3.72<br>10 <sup>-1</sup> | CN | Air transport services     | 1.10%  | 2.97<br>10 <sup>-1</sup> | CN | Air transport services     | 1.05%  | 4.07<br>10 <sup>-2</sup> | CN | Air transport services     | 1.05%  | 1.25<br>10 <sup>-2</sup> | CN | Air transport services     | 1.08%  | 5.96<br>10 <sup>-3</sup> |
| 12 | CN | Other mineral products     | 1.01%  | 0.627 | CN | Bituminous Coal            | 1.08%  | 3.61<br>10 <sup>-1</sup> | CN | Bituminous Coal            | 1.06%  | 2.88<br>10 <sup>-1</sup> | CN | Bituminous Coal            | 1.02%  | 3.95<br>10 <sup>-2</sup> | CN | Bituminous Coal            | 1.01%  | 1.21<br>10 <sup>-2</sup> | CN | Bituminous Coal            | 1.05%  | 5.79<br>10 <sup>-3</sup> |
| 13 | IS | Steam-Hot W. Sply.         | 0.97%  | 0.599 | CN | Other mineral products     | 0.98%  | 3.30<br>10 <sup>-1</sup> | CN | Other mineral products     | 0.97%  | 2.64<br>10 <sup>-1</sup> | CN | Other mineral products     | 0.93%  | 3.63<br>10 <sup>-2</sup> | CN | Other mineral products     | 0.93%  | 1.12<br>10 <sup>-2</sup> | CN | Other mineral products     | 0.96%  | 5.30<br>10 <sup>-3</sup> |
| 14 | CN | Supporting transport       | 0.70%  | 0.436 | CN | Supporting transport       | 0.68%  | 2.29<br>10 <sup>-1</sup> | CN | Supporting transport       | 0.67%  | 1.83<br>10 <sup>-1</sup> | IS | Construction work (45)     | 0.69%  | 2.67<br>10 <sup>-2</sup> | IS | Construction work (45)     | 0.70%  | 8.33<br>10 <sup>-3</sup> | CN | Supporting transport       | 0.66%  | 3.67<br>10 <sup>-3</sup> |
| 15 | CN | Elec. Gas                  | 0.62%  | 0.381 | CN | Elec. Gas                  | 0.60%  | 2.00<br>10 <sup>-1</sup> | CN | Elec. Gas                  | 0.59%  | 1.60<br>10 <sup>-1</sup> | CN | Supporting transport       | 0.64%  | 2.50<br>10 <sup>-2</sup> | CN | Supporting transport       | 0.64%  | 7.68<br>10 <sup>-3</sup> | IS | Construction work (45)     | 0.61%  | 3.39<br>10 <sup>-3</sup> |
| 16 | CN | Inland transportation      | 0.55%  | 0.341 | IS | Construction work (45)     | 0.54%  | 1.80<br>10 <sup>-1</sup> | IS | Construction work (45)     | 0.57%  | 1.53<br>10 <sup>-1</sup> | CN | Elec. Gas                  | 0.56%  | 2.19<br>10 <sup>-2</sup> | CN | Elec. Gas                  | 0.56%  | 6.72<br>10 <sup>-3</sup> | CN | Elec. Gas                  | 0.58%  | 3.21<br>10 <sup>-3</sup> |
| 17 | CN | Sea transportation         | 0.48%  | 0.298 | CN | Inland transportation      | 0.53%  | 1.79<br>10 <sup>-1</sup> | CN | Inland transportation      | 0.53%  | 1.43<br>10 <sup>-1</sup> | CN | Inland transportation      | 0.50%  | 1.96<br>10 <sup>-2</sup> | CN | Inland transportation      | 0.50%  | 6.02<br>10 <sup>-3</sup> | CN | Inland transportation      | 0.52%  | 2.87<br>10 <sup>-3</sup> |
| 18 | IS | Construction work (45)     | 0.44%  | 0.275 | CN | Sea transportation         | 0.47%  | 1.57<br>10 <sup>-1</sup> | CN | Sea transportation         | 0.46%  | 1.25<br>10 <sup>-1</sup> | CN | Sea transportation         | 0.44%  | 1.71<br>10 <sup>-2</sup> | CN | Sea transportation         | 0.44%  | 5.27<br>10 <sup>-3</sup> | CN | Sea transportation         | 0.45%  | 2.51<br>10 <sup>-3</sup> |
| 19 | CN | Coke Oven                  | 0.44%  | 0.274 | CN | Coke Oven                  | 0.43%  | 1.44<br>10 <sup>-1</sup> | CN | Coke Oven                  | 0.43%  | 1.15<br>10 <sup>-1</sup> | CN | Coke Oven                  | 0.41%  | 1.58<br>10 <sup>-2</sup> | CN | Coke Oven                  | 0.40%  | 4.85<br>10 <sup>-3</sup> | CN | Coke Oven                  | 0.42%  | 2.31<br>10 <sup>-3</sup> |
| 20 | CN | Paper products             | 0.42%  | 0.257 | CN | Paper products             | 0.40%  | 1.36<br>10 <sup>-1</sup> | CN | Paper products             | 0.40%  | 1.08<br>10 <sup>-1</sup> | CN | paper products             | 0.38%  | 1.49<br>10 <sup>-2</sup> | CN | Paper products             | 0.38%  | 4.57<br>10 <sup>-3</sup> | CN | Paper products             | 0.39%  | 2.17<br>10 <sup>-3</sup> |

Table 67: Total Annual Carbon Footprint Distribution of Bitcoin mining in Iceland by country

| Order | Total GWP per year (MtCO <sub>2</sub> -eqv.) |      |      |      |      |      |
|-------|----------------------------------------------|------|------|------|------|------|
|       | 2020                                         | 2019 | 2018 | 2017 | 2016 | 2015 |



|    | C.C. | P.A.D.*<br>(%) | GWP                   |
|----|------|----------------|-----------------------|------|----------------|-----------------------|------|----------------|-----------------------|------|----------------|-----------------------|------|----------------|-----------------------|------|----------------|-----------------------|
| 1  | CN   | 78.47%         | 1.49 10 <sup>-2</sup> | CN   | 75.98%         | 5.39 10 <sup>-2</sup> | CN   | 75.22%         | 1.51 10 <sup>-2</sup> | CN   | 71.90%         | 5.48 10 <sup>-3</sup> | CN   | 71.68%         | 2.3 10 <sup>-3</sup>  | CN   | 73.95%         | 8.42 10 <sup>-4</sup> |
| 2  | IS   | 9.28%          | 1.77 10 <sup>-3</sup> | IS   | 11.21%         | 7.95 10 <sup>-3</sup> | IS   | 11.79%         | 2.36 10 <sup>-3</sup> | IS   | 14.35%         | 1.09 10 <sup>-3</sup> | IS   | 14.52%         | 4.66 10 <sup>-4</sup> | IS   | 12.77%         | 1.45 10 <sup>-4</sup> |
| 3  | WA   | 1.62%          | 3.09 10 <sup>-4</sup> | RU   | 1.77%          | 1.26 10 <sup>-3</sup> | RU   | 1.84%          | 3.68 10 <sup>-4</sup> | RU   | 2.13%          | 1.62 10 <sup>-4</sup> | RU   | 2.15%          | 6.9 10 <sup>-5</sup>  | RU   | 1.95%          | 2.22 10 <sup>-5</sup> |
| 4  | RU   | 1.55%          | 2.95 10 <sup>-4</sup> | WA   | 1.68%          | 1.19 10 <sup>-3</sup> | WA   | 1.69%          | 3.39 10 <sup>-4</sup> | WA   | 1.77%          | 1.35 10 <sup>-4</sup> | WA   | 1.77%          | 5.69 10 <sup>-5</sup> | WA   | 1.72%          | 1.96 10 <sup>-5</sup> |
| 5  | WM   | 1.31%          | 2.48 10 <sup>-4</sup> | WM   | 1.37%          | 9.69 10 <sup>-4</sup> | WM   | 1.38%          | 2.77 10 <sup>-4</sup> | WM   | 1.46%          | 1.11 10 <sup>-4</sup> | WM   | 1.47%          | 4.71 10 <sup>-5</sup> | WM   | 1.41%          | 1.61 10 <sup>-5</sup> |
| 6  | JP   | 1.29%          | 2.46 10 <sup>-4</sup> | JP   | 1.26%          | 8.94 10 <sup>-4</sup> | JP   | 1.25%          | 2.5 10 <sup>-4</sup>  | JP   | 1.21%          | 9.19 10 <sup>-5</sup> | JP   | 1.20%          | 3.86 10 <sup>-5</sup> | JP   | 1.23%          | 1.41 10 <sup>-5</sup> |
| 7  | US   | 1.14%          | 2.16 10 <sup>-4</sup> | US   | 1.16%          | 8.21 10 <sup>-4</sup> | US   | 1.16%          | 2.33 10 <sup>-4</sup> | US   | 1.19%          | 9.08 10 <sup>-5</sup> | US   | 1.19%          | 3.83 10 <sup>-5</sup> | US   | 1.17%          | 1.34 10 <sup>-5</sup> |
| 8  | KR   | 1.05%          | 2.0 10 <sup>-4</sup>  | KR   | 1.03%          | 7.34 10 <sup>-4</sup> | KR   | 1.03%          | 2.06 10 <sup>-4</sup> | KR   | 1.01%          | 7.7 10 <sup>-5</sup>  | KR   | 1.01%          | 3.24 10 <sup>-5</sup> | KR   | 1.02%          | 1.17 10 <sup>-5</sup> |
| 9  | DE   | 0.74%          | 1.41 10 <sup>-4</sup> | DE   | 0.76%          | 5.36 10 <sup>-4</sup> | DE   | 0.76%          | 1.52 10 <sup>-4</sup> | DE   | 0.78%          | 5.91 10 <sup>-5</sup> | DE   | 0.78%          | 2.49 10 <sup>-5</sup> | DE   | 0.77%          | 8.72 10 <sup>-6</sup> |
| 10 | IN   | 0.39%          | 7.5 10 <sup>-5</sup>  | IN   | 0.41%          | 2.92 10 <sup>-4</sup> | IN   | 0.42%          | 8.37 10 <sup>-5</sup> | IN   | 0.44%          | 3.36 10 <sup>-5</sup> | IN   | 0.44%          | 1.42 10 <sup>-5</sup> | IN   | 0.43%          | 4.86 10 <sup>-6</sup> |

Table 68: Total Annual Carbon Footprint Distribution of Bitcoin mining in Iceland by sector

| O. | Total GWP per year (MtCO <sub>2</sub> -eqv.) |                            |                |                          |      |                            |                |                          |      |                            |                |                          |      |                            |                |                          |      |                            |                |                          |      |                            |                |                          |
|----|----------------------------------------------|----------------------------|----------------|--------------------------|------|----------------------------|----------------|--------------------------|------|----------------------------|----------------|--------------------------|------|----------------------------|----------------|--------------------------|------|----------------------------|----------------|--------------------------|------|----------------------------|----------------|--------------------------|
|    | 2020                                         |                            |                |                          | 2019 |                            |                |                          | 2018 |                            |                |                          | 2017 |                            |                |                          | 2016 |                            |                |                          | 2015 |                            |                |                          |
|    | C.C.                                         | Sector                     | P.A.D.*<br>(%) | GWP                      | C.C. | Sector                     | P.A.D.*<br>(%) | GWP                      | C.C. | Sector                     | P.A.D.*<br>(%) | GWP                      | C.C. | Sector                     | P.A.D.*<br>(%) | GWP                      | C.C. | Sector                     | P.A.D.*<br>(%) | GWP                      | C.C. | Sector                     | P.A.D.*<br>(%) | GWP                      |
| 1  | CN                                           | Elec. Coal                 | 44.74%         | 8.52<br>10 <sup>-3</sup> | CN   | Elec. Coal                 | 43.30%         | 3.07<br>10 <sup>-2</sup> | CN   | Elec. Coal                 | 42.86%         | 8.59<br>10 <sup>-3</sup> | CN   | Elec. Coal                 | 40.95%         | 3.12<br>10 <sup>-3</sup> | CN   | Elec. Coal                 | 40.82%         | 1.31<br>10 <sup>-3</sup> | CN   | Elec. Coal                 | 42.13%         | 4.80<br>10 <sup>-4</sup> |
| 2  | CN                                           | Iron and Steel             | 10.01%         | 1.91<br>10 <sup>-3</sup> | CN   | Iron and Steel             | 9.70%          | 6.88<br>10 <sup>-3</sup> | CN   | Iron and Steel             | 9.60%          | 1.92<br>10 <sup>-3</sup> | CN   | Iron and Steel             | 9.18%          | 7.00<br>10 <sup>-4</sup> | CN   | Iron and Steel             | 9.16%          | 2.94<br>10 <sup>-4</sup> | CN   | Iron and Steel             | 9.44%          | 1.08<br>10 <sup>-4</sup> |
| 3  | CN                                           | Steam-Hot W. Sply.         | 4.21%          | 8.01<br>10 <sup>-4</sup> | CN   | Steam-Hot W. Sply.         | 4.07%          | 2.89<br>10 <sup>-3</sup> | CN   | Steam-Hot W. Sply.         | 4.03%          | 8.07<br>10 <sup>-4</sup> | IS   | Electricity by hydro       | 4.06%          | 3.09<br>10 <sup>-4</sup> | IS   | Electricity by hydro       | 4.11%          | 1.32<br>10 <sup>-4</sup> | CN   | Steam-Hot W. Sply.         | 3.96%          | 4.51<br>10 <sup>-5</sup> |
| 4  | IS                                           | Electricity by hydro       | 2.62%          | 4.98<br>10 <sup>-4</sup> | IS   | Electricity by hydro       | 3.16%          | 2.25<br>10 <sup>-3</sup> | IS   | Electricity by hydro       | 3.33%          | 6.67<br>10 <sup>-4</sup> | CN   | Steam-Hot W. Sply          | 3.85%          | 2.93<br>10 <sup>-4</sup> | CN   | Steam-Hot W. Sply.         | 3.84%          | 1.23<br>10 <sup>-4</sup> | IS   | Electricity by hydro       | 3.61%          | 4.11<br>10 <sup>-5</sup> |
| 5  | CN                                           | O. Machinery and Computers | 2.47%          | 4.71<br>10 <sup>-4</sup> | CN   | O. Machinery and Computers | 2.39%          | 1.70<br>10 <sup>-3</sup> | IS   | Elec. Coal                 | 2.40%          | 4.81<br>10 <sup>-4</sup> | IS   | Elec. Coal                 | 2.92%          | 2.22<br>10 <sup>-4</sup> | IS   | Elec. Coal                 | 2.96%          | 9.48<br>10 <sup>-5</sup> | IS   | Elec. Coal                 | 2.60%          | 2.96<br>10 <sup>-5</sup> |
| 6  | CN                                           | Rubber and plastic         | 2.44%          | 4.65<br>10 <sup>-4</sup> | CN   | Rubber and plastic         | 2.37%          | 1.68<br>10 <sup>-3</sup> | CN   | O. Machinery and Computers | 2.36%          | 4.74<br>10 <sup>-4</sup> | CN   | O. Machinery and Computers | 2.25%          | 1.72<br>10 <sup>-4</sup> | CN   | O. Machinery and Computers | 2.25%          | 7.21<br>10 <sup>-5</sup> | CN   | O. Machinery and Computers | 2.32%          | 2.65<br>10 <sup>-5</sup> |
| 7  | IS                                           | Elec. Coal                 | 1.89%          | 3.60<br>10 <sup>-4</sup> | IS   | Elec. Coal                 | 2.28%          | 1.62<br>10 <sup>-3</sup> | CN   | Rubber and plastic         | 2.34%          | 4.69<br>10 <sup>-4</sup> | CN   | Rubber and plastic         | 2.24%          | 1.71<br>10 <sup>-4</sup> | CN   | Rubber and plastic         | 2.23%          | 7.17<br>10 <sup>-5</sup> | CN   | Rubber and plastic         | 2.30%          | 2.62<br>10 <sup>-5</sup> |
| 8  | CN                                           | Chemicals nec              | 1.77%          | 3.37<br>10 <sup>-4</sup> | CN   | Chemicals nec              | 1.71%          | 1.22<br>10 <sup>-3</sup> | CN   | Chemicals nec              | 1.70%          | 3.40<br>10 <sup>-4</sup> | IS   | Dist. of gaseous fuels     | 1.69%          | 1.29<br>10 <sup>-4</sup> | IS   | Dist. of gaseous fuels     | 1.71%          | 5.50<br>10 <sup>-5</sup> | CN   | Chemicals nec              | 1.67%          | 1.90<br>10 <sup>-5</sup> |
| 9  | CN                                           | Air transport services     | 1.14%          | 2.17<br>10 <sup>-4</sup> | IS   | Dist. of gaseous fuels     | 1.32%          | 9.37<br>10 <sup>-4</sup> | IS   | Dist. of gaseous fuels     | 1.39%          | 2.78<br>10 <sup>-4</sup> | CN   | Chemicals nec              | 1.62%          | 1.24<br>10 <sup>-4</sup> | CN   | Chemicals nec              | 1.62%          | 5.19<br>10 <sup>-5</sup> | IS   | Dist. of gaseous fuels     | 1.51%          | 1.71<br>10 <sup>-5</sup> |
| 10 | CN                                           | Bituminous Coal            | 1.11%          | 2.11<br>10 <sup>-4</sup> | IS   | Steam-Hot W. Sply.         | 1.17%          | 8.27<br>10 <sup>-4</sup> | IS   | Steam-Hot W. Sply.         | 1.23%          | 2.45<br>10 <sup>-4</sup> | IS   | Steam-Hot W. Sply          | 1.49%          | 1.13<br>10 <sup>-4</sup> | IS   | Steam-Hot W. Sply.         | 1.51%          | 4.83<br>10 <sup>-5</sup> | IS   | Steam-Hot W. Sply.         | 1.33%          | 1.51<br>10 <sup>-5</sup> |
| 11 | IS                                           | Dist. of gaseous fuels     | 1.09%          | 2.08<br>10 <sup>-4</sup> | CN   | Air transport services     | 1.11%          | 7.85<br>10 <sup>-4</sup> | CN   | Air transport services     | 1.10%          | 2.20<br>10 <sup>-4</sup> | CN   | Air transport services     | 1.05%          | 7.99<br>10 <sup>-5</sup> | CN   | Air transport services     | 1.05%          | 3.35<br>10 <sup>-5</sup> | CN   | Air transport services     | 1.08%          | 1.23<br>10 <sup>-5</sup> |
| 12 | CN                                           | Other mineral products     | 1.01%          | 1.93<br>10 <sup>-4</sup> | CN   | Bituminous Coal            | 1.08%          | 7.63<br>10 <sup>-4</sup> | CN   | Bituminous Coal            | 1.06%          | 2.13<br>10 <sup>-4</sup> | CN   | Bituminous Coal            | 1.02%          | 7.76<br>10 <sup>-5</sup> | CN   | Bituminous Coal            | 1.01%          | 3.26<br>10 <sup>-5</sup> | CN   | Bituminous Coal            | 1.05%          | 1.19<br>10 <sup>-5</sup> |
| 13 | IS                                           | Steam-Hot W. Sply.         | 0.97%          | 1.84<br>10 <sup>-4</sup> | CN   | Other mineral products     | 0.98%          | 6.97<br>10 <sup>-4</sup> | CN   | Other mineral products     | 0.97%          | 1.95<br>10 <sup>-4</sup> | CN   | Other mineral products     | 0.93%          | 7.12<br>10 <sup>-5</sup> | CN   | Other mineral products     | 0.93%          | 2.99<br>10 <sup>-5</sup> | CN   | Other mineral products     | 0.96%          | 1.09<br>10 <sup>-5</sup> |
| 14 | CN                                           | Supporting transport       | 0.70%          | 1.34<br>10 <sup>-4</sup> | CN   | Supporting transport       | 0.68%          | 4.83<br>10 <sup>-4</sup> | CN   | Supporting transport       | 0.67%          | 1.35<br>10 <sup>-4</sup> | IS   | Construction work (45)     | 0.69%          | 5.24<br>10 <sup>-5</sup> | IS   | Construction work (45)     | 0.70%          | 2.23<br>10 <sup>-5</sup> | CN   | Supporting transport       | 0.66%          | 7.55<br>10 <sup>-6</sup> |

|    |    |                        |       |                      |    |                        |       |                      |    |                        |       |                      |    |                       |       |                      |    |                       |       |                      |    |                        |       |                      |
|----|----|------------------------|-------|----------------------|----|------------------------|-------|----------------------|----|------------------------|-------|----------------------|----|-----------------------|-------|----------------------|----|-----------------------|-------|----------------------|----|------------------------|-------|----------------------|
| 15 | CN | Elec. Gas              | 0.62% | $1.17 \cdot 10^{-4}$ | CN | Elec. Gas              | 0.60% | $4.23 \cdot 10^{-4}$ | CN | Elec. Gas              | 0.59% | $1.18 \cdot 10^{-4}$ | CN | Supporting transport  | 0.64% | $4.91 \cdot 10^{-5}$ | CN | Supporting transport  | 0.64% | $2.06 \cdot 10^{-5}$ | IS | Construction work (45) | 0.61% | $6.97 \cdot 10^{-6}$ |
| 16 | CN | Inland transportation  | 0.55% | $1.05 \cdot 10^{-4}$ | IS | Construction work (45) | 0.54% | $3.81 \cdot 10^{-4}$ | IS | Construction work (45) | 0.57% | $1.13 \cdot 10^{-4}$ | CN | Elec. Gas             | 0.56% | $4.29 \cdot 10^{-5}$ | CN | Elec. Gas             | 0.56% | $1.80 \cdot 10^{-5}$ | CN | Elec. Gas              | 0.58% | $6.60 \cdot 10^{-6}$ |
| 17 | CN | Sea transportation     | 0.48% | $9.15 \cdot 10^{-5}$ | CN | Inland transportation  | 0.53% | $3.78 \cdot 10^{-4}$ | CN | Inland transportation  | 0.53% | $1.06 \cdot 10^{-4}$ | CN | Inland transportation | 0.50% | $3.84 \cdot 10^{-5}$ | CN | Inland transportation | 0.50% | $1.61 \cdot 10^{-5}$ | CN | Inland transportation  | 0.52% | $5.91 \cdot 10^{-6}$ |
| 18 | IS | Construction work (45) | 0.44% | $8.45 \cdot 10^{-5}$ | CN | Sea transportation     | 0.47% | $3.31 \cdot 10^{-4}$ | CN | Sea transportation     | 0.46% | $9.24 \cdot 10^{-5}$ | CN | Sea transportation    | 0.44% | $3.36 \cdot 10^{-5}$ | CN | Sea transportation    | 0.44% | $1.41 \cdot 10^{-5}$ | CN | Sea transportation     | 0.45% | $5.17 \cdot 10^{-6}$ |
| 19 | CN | Coke Oven              | 0.44% | $8.43 \cdot 10^{-5}$ | CN | Coke Oven              | 0.43% | $3.04 \cdot 10^{-4}$ | CN | Coke Oven              | 0.43% | $8.51 \cdot 10^{-5}$ | CN | Coke Oven             | 0.41% | $3.09 \cdot 10^{-5}$ | CN | Coke Oven             | 0.40% | $1.30 \cdot 10^{-5}$ | CN | Coke Oven              | 0.42% | $4.76 \cdot 10^{-6}$ |
| 20 | CN | Paper products         | 0.42% | $7.92 \cdot 10^{-5}$ | CN | Paper products         | 0.40% | $2.86 \cdot 10^{-4}$ | CN | Paper products         | 0.40% | $8.00 \cdot 10^{-5}$ | CN | Paper products        | 0.38% | $2.91 \cdot 10^{-5}$ | CN | Paper products        | 0.38% | $1.22 \cdot 10^{-5}$ | CN | Paper products         | 0.39% | $4.48 \cdot 10^{-6}$ |

e) USA

Table 69: Carbon Footprint Distribution of Bitcoin mining in USA per transaction by country

| Order | GWP per transaction per year (kgCO <sub>2</sub> -eqv.) |                |         |      |                |                       |      |                |                       |      |                |                       |      |                |                       |      |                |                       |
|-------|--------------------------------------------------------|----------------|---------|------|----------------|-----------------------|------|----------------|-----------------------|------|----------------|-----------------------|------|----------------|-----------------------|------|----------------|-----------------------|
|       | 2020                                                   |                |         | 2019 |                |                       | 2018 |                |                       | 2017 |                |                       | 2016 |                |                       | 2015 |                |                       |
|       | C.C.                                                   | P.A.D.*<br>(%) | GWP     | C.C. | P.A.D.*<br>(%) | GWP                   | C.C. | P.A.D.*<br>(%) | GWP                   | C.C. | P.A.D.*<br>(%) | GWP                   | C.C. | P.A.D.*<br>(%) | GWP                   | C.C. | P.A.D.*<br>(%) | GWP                   |
| 1     | US                                                     | 85.76%         | 322.310 | US   | 88.25%         | 211.507               | US   | 88.85%         | 179.425               | US   | 91.07%         | 31.334                | US   | 91.14%         | 9.774                 | US   | 89.78%         | 3.972                 |
| 2     | CN                                                     | 12.85%         | 48.307  | CN   | 10.57%         | 25.340                | CN   | 10.02%         | 20.227                | CN   | 7.99%          | 2.750                 | CN   | 7.92%          | 8.49 10 <sup>-1</sup> | CN   | 9.17%          | 4.06 10 <sup>-1</sup> |
| 3     | JP                                                     | 0.21%          | 0.781   | JP   | 0.17%          | 4.11 10 <sup>-1</sup> | JP   | 0.16%          | 3.28 10 <sup>-1</sup> | JP   | 0.13%          | 4.47 10 <sup>-2</sup> | JP   | 0.13%          | 1.38 10 <sup>-2</sup> | JP   | 0.15%          | 6.59 10 <sup>-3</sup> |
| 4     | WA                                                     | 0.20%          | 0.747   | WA   | 0.17%          | 3.95 10 <sup>-1</sup> | WA   | 0.16%          | 3.16 10 <sup>-1</sup> | WA   | 0.13%          | 4.35 10 <sup>-2</sup> | WA   | 0.13%          | 1.34 10 <sup>-2</sup> | WA   | 0.14%          | 6.37 10 <sup>-3</sup> |
| 5     | KR                                                     | 0.16%          | 0.602   | KR   | 0.13%          | 3.17 10 <sup>-1</sup> | KR   | 0.13%          | 2.53 10 <sup>-1</sup> | KR   | 0.10%          | 3.45 10 <sup>-2</sup> | KR   | 0.10%          | 1.07 10 <sup>-2</sup> | KR   | 0.12%          | 5.08 10 <sup>-3</sup> |
| 6     | WM                                                     | 0.15%          | 0.575   | WM   | 0.13%          | 3.06 10 <sup>-1</sup> | WM   | 0.12%          | 2.45 10 <sup>-1</sup> | WM   | 0.10%          | 3.4 10 <sup>-2</sup>  | WM   | 0.10%          | 1.05 10 <sup>-2</sup> | WM   | 0.11%          | 4.95 10 <sup>-3</sup> |
| 7     | RU                                                     | 0.10%          | 0.386   | RU   | 0.09%          | 2.18 10 <sup>-1</sup> | RU   | 0.09%          | 1.78 10 <sup>-1</sup> | RU   | 0.08%          | 2.69 10 <sup>-2</sup> | RU   | 0.08%          | 8.33 10 <sup>-3</sup> | RU   | 0.08%          | 3.72 10 <sup>-3</sup> |
| 8     | DE                                                     | 0.10%          | 0.376   | DE   | 0.08%          | 1.99 10 <sup>-1</sup> | DE   | 0.08%          | 1.59 10 <sup>-1</sup> | WL   | 0.07%          | 2.28 10 <sup>-2</sup> | WL   | 0.07%          | 7.08 10 <sup>-3</sup> | DE   | 0.07%          | 3.21 10 <sup>-3</sup> |
| 9     | WL                                                     | 0.08%          | 0.281   | WL   | 0.07%          | 1.7 10 <sup>-1</sup>  | WL   | 0.07%          | 1.41 10 <sup>-1</sup> | DE   | 0.06%          | 2.2 10 <sup>-2</sup>  | DE   | 0.06%          | 6.79 10 <sup>-3</sup> | WL   | 0.07%          | 3.02 10 <sup>-3</sup> |
| 10    | IN                                                     | 0.05%          | 0.177   | IN   | 0.04%          | 9.43 10 <sup>-2</sup> | IN   | 0.04%          | 7.57 10 <sup>-2</sup> | IN   | 0.03%          | 1.06 10 <sup>-2</sup> | IN   | 0.03%          | 3.27 10 <sup>-3</sup> | IN   | 0.04%          | 1.53 10 <sup>-3</sup> |

Table 70: Carbon Footprint Distribution of Bitcoin mining in USA per transaction by sector in Supply Chain

| O. | GWP per transaction per year (kgCO <sub>2</sub> -eqv.) |                |                    |         |      |                |                    |         |      |                |                    |         |      |                |                    |                       |      |                |                    |                       |      |                |                    |                       |
|----|--------------------------------------------------------|----------------|--------------------|---------|------|----------------|--------------------|---------|------|----------------|--------------------|---------|------|----------------|--------------------|-----------------------|------|----------------|--------------------|-----------------------|------|----------------|--------------------|-----------------------|
|    | 2020                                                   |                |                    |         | 2019 |                |                    |         | 2018 |                |                    |         | 2017 |                |                    |                       | 2016 |                |                    |                       | 2015 |                |                    |                       |
|    | C.C.                                                   | Sector         | P.A.<br>D.*<br>(%) | GWP     | C.C. | Sector         | P.A.D.<br>*<br>(%) | GWP     | C.C. | Sector         | P.A.<br>D.*<br>(%) | GWP     | C.C. | Sector         | P.A.D<br>.*<br>(%) | GWP                   | C.C. | Sector         | P.A.<br>D.*<br>(%) | GWP                   | C.C. | Sector         | P.A.D.<br>*<br>(%) | GWP                   |
| 1  | US                                                     | Elec. Coal     | 48.7<br>8%         | 183.320 | US   | Elec. Coal     | 50.20<br>%         | 120.318 | US   | Elec. Coal     | 50.55<br>%         | 102.071 | US   | Elec. Coal     | 51.81<br>%         | 17.828                | US   | Elec. Coal     | 51.86<br>%         | 5.561                 | US   | Elec. Coal     | 51.07<br>%         | 2.260                 |
| 2  | US                                                     | Elec. Gas      | 35.3<br>1%         | 132.715 | US   | Elec. Gas      | 36.35<br>%         | 87.116  | US   | Elec. Gas      | 36.6<br>0%         | 73.907  | US   | Elec. Gas      | 37.52<br>%         | 12.910                | US   | Elec. Gas      | 37.5<br>5%         | 4.027                 | US   | Elec. Gas      | 36.98<br>%         | 1.636                 |
| 3  | CN                                                     | Elec. Coal     | 7.34<br>%          | 27.579  | CN   | Elec. Coal     | 6.04%              | 14.466  | CN   | Elec. Coal     | 5.72<br>%          | 11.547  | CN   | Elec. Coal     | 4.56<br>%          | 1.570                 | CN   | Elec. Coal     | 4.52<br>%          | 4.85 10 <sup>-1</sup> | CN   | Elec. Coal     | 5.24%              | 2.32 10 <sup>-1</sup> |
| 4  | CN                                                     | Iron and Steel | 1.64<br>%          | 6.154   | CN   | Iron and Steel | 1.35%              | 3.228   | CN   | Iron and Steel | 1.28<br>%          | 2.577   | CN   | Iron and Steel | 1.02<br>%          | 3.50 10 <sup>-1</sup> | CN   | Iron and Steel | 1.01<br>%          | 1.08 10 <sup>-1</sup> | CN   | Iron and Steel | 1.17%              | 5.17 10 <sup>-2</sup> |

|    |    |                                       |        |       |    |                                       |       |       |    |                                       |        |       |    |                                       |        |                       |    |                                       |        |                       |    |                                       |       |                       |
|----|----|---------------------------------------|--------|-------|----|---------------------------------------|-------|-------|----|---------------------------------------|--------|-------|----|---------------------------------------|--------|-----------------------|----|---------------------------------------|--------|-----------------------|----|---------------------------------------|-------|-----------------------|
| 5  | CN | Steam-Hot W. Sply.                    | 0.69 % | 2.592 | US | Elec. Petroleum                       | 0.58% | 1.397 | US | Elec. Petroleum                       | 0.59 % | 1.185 | US | Elec. Petroleum                       | 0.60 % | 2.07 10 <sup>-1</sup> | US | Elec. Petroleum                       | 0.60 % | 6.45 10 <sup>-2</sup> | US | Elec. Petroleum                       | 0.59% | 2.62 10 <sup>-2</sup> |
| 6  | US | Elec. Petroleum                       | 0.57 % | 2.128 | CN | Steam-Hot W. Sply.                    | 0.57% | 1.360 | CN | Steam-Hot W. Sply.                    | 0.54 % | 1.085 | US | Electricity by biomass and waste      | 0.55 % | 1.90 10 <sup>-1</sup> | US | Electricity by biomass and waste      | 0.55 % | 5.91 10 <sup>-2</sup> | US | Electricity by biomass and waste      | 0.54% | 2.40 10 <sup>-2</sup> |
| 7  | US | Electricity by biomass and waste      | 0.52 % | 1.949 | US | Electricity by biomass and waste      | 0.53% | 1.279 | US | Electricity by biomass and waste      | 0.54 % | 1.085 | CN | Steam-Hot W. Sply.                    | 0.43 % | 1.48 10 <sup>-1</sup> | CN | Steam-Hot W. Sply.                    | 0.43 % | 4.56 10 <sup>-2</sup> | CN | Steam-Hot W. Sply.                    | 0.49% | 2.18 10 <sup>-2</sup> |
| 8  | CN | O. Machinery and Computers            | 0.41 % | 1.531 | CN | O. Machinery and Computers            | 0.34% | 0.803 | CN | O. Machinery and Computers            | 0.32 % | 0.641 | CN | O. Machinery and Computers            | 0.25 % | 8.70 10 <sup>-2</sup> | CN | O. Machinery and Computers            | 0.25 % | 2.69 10 <sup>-2</sup> | CN | O. Machinery and Computers            | 0.29% | 1.29 10 <sup>-2</sup> |
| 9  | CN | Rubber and plastic                    | 0.40 % | 1.502 | CN | Rubber and plastic                    | 0.33% | 0.788 | CN | Rubber and plastic                    | 0.31 % | 0.629 | CN | Rubber and plastic                    | 0.25 % | 8.55 10 <sup>-2</sup> | CN | Rubber and plastic                    | 0.25 % | 2.64 10 <sup>-2</sup> | CN | Rubber and plastic                    | 0.29% | 1.26 10 <sup>-2</sup> |
| 10 | CN | Chemicals nec                         | 0.29 % | 1.086 | CN | Chemicals nec                         | 0.24% | 0.570 | CN | Chemicals nec                         | 0.23 % | 0.455 | US | Bituminous Coal                       | 0.21 % | 7.38 10 <sup>-2</sup> | US | Bituminous Coal                       | 0.22 % | 2.30 10 <sup>-2</sup> | US | Bituminous Coal                       | 0.21% | 9.37 10 <sup>-3</sup> |
| 11 | US | Bituminous Coal                       | 0.20 % | 0.764 | US | Bituminous Coal                       | 0.21% | 0.500 | US | Bituminous Coal                       | 0.21 % | 0.424 | CN | Chemicals nec                         | 0.18 % | 6.18 10 <sup>-2</sup> | CN | Chemicals nec                         | 0.18 % | 1.91 10 <sup>-2</sup> | CN | Chemicals nec                         | 0.21% | 9.12 10 <sup>-3</sup> |
| 12 | CN | Air transport services                | 0.19 % | 0.701 | CN | Air transport services                | 0.15% | 0.368 | CN | Air transport services                | 0.15 % | 0.293 | CN | Air transport services                | 0.12 % | 3.99 10 <sup>-2</sup> | CN | Air transport services                | 0.12 % | 1.23 10 <sup>-2</sup> | CN | Air transport services                | 0.13% | 5.89 10 <sup>-3</sup> |
| 13 | CN | Bituminous Coal                       | 0.18 % | 0.683 | CN | Bituminous Coal                       | 0.15% | 0.358 | CN | Bituminous Coal                       | 0.14 % | 0.286 | CN | Bituminous Coal                       | 0.11 % | 3.89 10 <sup>-2</sup> | CN | Bituminous Coal                       | 0.11 % | 1.20 10 <sup>-2</sup> | CN | Bituminous Coal                       | 0.13% | 5.74 10 <sup>-3</sup> |
| 14 | CN | Other mineral products                | 0.16 % | 0.616 | CN | Other mineral products                | 0.14% | 0.323 | CN | Other mineral products                | 0.13 % | 0.258 | CN | Other mineral products                | 0.10 % | 3.51 10 <sup>-2</sup> | CN | Other mineral products                | 0.10 % | 1.08 10 <sup>-2</sup> | CN | Other mineral products                | 0.12% | 5.18 10 <sup>-3</sup> |
| 15 | CN | Supporting transport                  | 0.12 % | 0.434 | CN | Supporting transport                  | 0.10% | 0.227 | US | Transportation services via pipelines | 0.09 % | 0.188 | US | Transportation services via pipelines | 0.10 % | 3.26 10 <sup>-2</sup> | US | Transportation services via pipelines | 0.10 % | 1.02 10 <sup>-2</sup> | US | Transportation services via pipelines | 0.09% | 4.15 10 <sup>-3</sup> |
| 16 | CN | Elec. Gas                             | 0.10 % | 0.379 | US | Transportation services via pipelines | 0.09% | 0.222 | CN | Supporting transport                  | 0.09 % | 0.181 | US | Retail trade                          | 0.08 % | 2.75 10 <sup>-2</sup> | US | Retail trade                          | 0.08 % | 8.59 10 <sup>-3</sup> | CN | Supporting transport                  | 0.08% | 3.64 10 <sup>-3</sup> |
| 17 | CN | Inland transportation                 | 0.09 % | 0.340 | CN | Elec. Gas                             | 0.08% | 0.199 | CN | Elec. Gas                             | 0.08 % | 0.159 | CN | Supporting transport                  | 0.07 % | 2.47 10 <sup>-2</sup> | CN | Supporting transport                  | 0.07 % | 7.62 10 <sup>-3</sup> | US | Retail trade                          | 0.08% | 3.50 10 <sup>-3</sup> |
| 18 | US | Transportation services via pipelines | 0.09 % | 0.340 | US | Retail trade                          | 0.08% | 0.187 | US | Retail trade                          | 0.08 % | 0.159 | CN | Elec. Gas                             | 0.06 % | 2.16 10 <sup>-2</sup> | CN | Elec. Gas                             | 0.06 % | 6.67 10 <sup>-3</sup> | CN | Elec. Gas                             | 0.07% | 3.19 10 <sup>-3</sup> |
| 19 | CN | Sea transportation                    | 0.08 % | 0.295 | CN | Inland transportation                 | 0.07% | 0.178 | CN | Inland transportation                 | 0.07 % | 0.142 | CN | Inland transportation                 | 0.06 % | 1.93 10 <sup>-2</sup> | CN | Inland transportation                 | 0.06 % | 5.97 10 <sup>-3</sup> | CN | Inland transportation                 | 0.06% | 2.85 10 <sup>-3</sup> |
| 20 | US | Retail trade                          | 0.08 % | 0.288 | CN | Sea transportation                    | 0.07% | 0.155 | CN | Sea transportation                    | 0.06 % | 0.124 | CN | Sea transportation                    | 0.05 % | 1.68 10 <sup>-2</sup> | CN | Sea transportation                    | 0.05 % | 5.19 10 <sup>-3</sup> | CN | Sea transportation                    | 0.06% | 2.48 10 <sup>-3</sup> |

Table 71: Total Annual Carbon Footprint Distribution of Bitcoin mining in USA by country

| Order | Total GWP per year (MtCO <sub>2</sub> -eqv.) |             |                       |      |             |                       |      |             |                       |      |             |                       |      |             |                       |      |             |                       |
|-------|----------------------------------------------|-------------|-----------------------|------|-------------|-----------------------|------|-------------|-----------------------|------|-------------|-----------------------|------|-------------|-----------------------|------|-------------|-----------------------|
|       | 2020                                         |             |                       | 2019 |             |                       | 2018 |             |                       | 2017 |             |                       | 2016 |             |                       | 2015 |             |                       |
|       | C.C.                                         | P.A.D.* (%) | GWP                   | C.C. | P.A.D.* (%) | GWP                   | C.C. | P.A.D.* (%) | GWP                   | C.C. | P.A.D.* (%) | GWP                   | C.C. | P.A.D.* (%) | GWP                   | C.C. | P.A.D.* (%) | GWP                   |
| 1     | US                                           | 85.76%      | 5.845                 | US   | 88.25%      | 2.926                 | US   | 88.85%      | 1.378                 | US   | 91.07%      | 3.07 10 <sup>-1</sup> | US   | 91.14%      | 1.23 10 <sup>-1</sup> | US   | 89.78%      | 3.51 10 <sup>-2</sup> |
| 2     | CN                                           | 12.85%      | 8.76 10 <sup>-1</sup> | CN   | 10.57%      | 3.51 10 <sup>-1</sup> | CN   | 10.02%      | 1.55 10 <sup>-1</sup> | CN   | 7.99%       | 2.69 10 <sup>-2</sup> | CN   | 7.92%       | 1.07 10 <sup>-2</sup> | CN   | 9.17%       | 3.58 10 <sup>-3</sup> |
| 3     | JP                                           | 0.21%       | 1.42 10 <sup>-2</sup> | JP   | 0.17%       | 5.68 10 <sup>-3</sup> | JP   | 0.16%       | 2.52 10 <sup>-3</sup> | JP   | 0.13%       | 4.38 10 <sup>-4</sup> | JP   | 0.13%       | 1.73 10 <sup>-4</sup> | JP   | 0.15%       | 5.82 10 <sup>-5</sup> |
| 4     | WA                                           | 0.20%       | 1.35 10 <sup>-2</sup> | WA   | 0.17%       | 5.47 10 <sup>-3</sup> | WA   | 0.16%       | 2.43 10 <sup>-3</sup> | WA   | 0.13%       | 4.26 10 <sup>-4</sup> | WA   | 0.13%       | 1.69 10 <sup>-4</sup> | WA   | 0.14%       | 5.63 10 <sup>-5</sup> |
| 5     | KR                                           | 0.16%       | 1.09 10 <sup>-2</sup> | KR   | 0.13%       | 4.38 10 <sup>-3</sup> | KR   | 0.13%       | 1.94 10 <sup>-3</sup> | KR   | 0.10%       | 3.38 10 <sup>-4</sup> | KR   | 0.10%       | 1.34 10 <sup>-4</sup> | KR   | 0.12%       | 4.49 10 <sup>-5</sup> |
| 6     | WM                                           | 0.15%       | 1.04 10 <sup>-2</sup> | WM   | 0.13%       | 4.23 10 <sup>-3</sup> | WM   | 0.12%       | 1.88 10 <sup>-3</sup> | WM   | 0.10%       | 3.33 10 <sup>-4</sup> | WM   | 0.10%       | 1.32 10 <sup>-4</sup> | WM   | 0.11%       | 4.38 10 <sup>-5</sup> |
| 7     | RU                                           | 0.10%       | 6.99 10 <sup>-3</sup> | RU   | 0.09%       | 3.02 10 <sup>-3</sup> | RU   | 0.09%       | 1.37 10 <sup>-3</sup> | RU   | 0.08%       | 2.63 10 <sup>-4</sup> | RU   | 0.08%       | 1.04 10 <sup>-4</sup> | RU   | 0.08%       | 3.28 10 <sup>-5</sup> |

|           |    |       |                       |    |       |                       |    |       |                       |    |       |                       |    |       |                       |    |       |                       |
|-----------|----|-------|-----------------------|----|-------|-----------------------|----|-------|-----------------------|----|-------|-----------------------|----|-------|-----------------------|----|-------|-----------------------|
| <b>8</b>  | DE | 0.10% | 6.83 10 <sup>-3</sup> | DE | 0.08% | 2.76 10 <sup>-3</sup> | DE | 0.08% | 1.22 10 <sup>-3</sup> | WL | 0.07% | 2.23 10 <sup>-4</sup> | WL | 0.07% | 8.88 10 <sup>-5</sup> | DE | 0.07% | 2.84 10 <sup>-5</sup> |
| <b>9</b>  | WL | 0.08% | 5.1 10 <sup>-3</sup>  | WL | 0.07% | 2.35 10 <sup>-3</sup> | WL | 0.07% | 1.08 10 <sup>-3</sup> | DE | 0.06% | 2.15 10 <sup>-4</sup> | DE | 0.06% | 8.51 10 <sup>-5</sup> | WL | 0.07% | 2.67 10 <sup>-5</sup> |
| <b>10</b> | IN | 0.05% | 3.2 10 <sup>-3</sup>  | IN | 0.04% | 1.31 10 <sup>-3</sup> | IN | 0.04% | 5.81 10 <sup>-4</sup> | IN | 0.03% | 1.03 10 <sup>-4</sup> | IN | 0.03% | 4.09 10 <sup>-5</sup> | IN | 0.04% | 1.35 10 <sup>-5</sup> |

Table 72: Total Annual Carbon Footprint Distribution of Bitcoin mining in USA by sector

| O. | GWP per transaction per year (MtCO <sub>2</sub> -eqv.) |                                  |             |                       |      |                                        |             |                       |      |                                        |             |                       |      |                                       |             |                       |      |                                       |             |                       |      |                                       |             |                       |
|----|--------------------------------------------------------|----------------------------------|-------------|-----------------------|------|----------------------------------------|-------------|-----------------------|------|----------------------------------------|-------------|-----------------------|------|---------------------------------------|-------------|-----------------------|------|---------------------------------------|-------------|-----------------------|------|---------------------------------------|-------------|-----------------------|
|    | 2020                                                   |                                  |             |                       | 2019 |                                        |             |                       | 2018 |                                        |             |                       | 2017 |                                       |             |                       | 2016 |                                       |             |                       | 2015 |                                       |             |                       |
|    | C.C.                                                   | Sector                           | P.A.D.* (%) | GWP                   | C.C. | Sector                                 | P.A.D.* (%) | GWP                   | C.C. | Sector                                 | P.A.D.* (%) | GWP                   | C.C. | Sector                                | P.A.D.* (%) | GWP                   | C.C. | Sector                                | P.A.D.* (%) | GWP                   | C.C. | Sector                                | P.A.D.* (%) | GWP                   |
| 1  | US                                                     | Elec. Coal                       | 48.78%      | 3.324                 | US   | Elec. Coal                             | 50.20%      | 1.665                 | US   | Elec. Coal                             | 50.55%      | 7.84 10 <sup>-1</sup> | US   | Elec. Coal                            | 51.81%      | 1.75 10 <sup>-1</sup> | US   | Elec. Coal                            | 51.86%      | 6.97 10 <sup>-2</sup> | US   | Elec. Coal                            | 51.07%      | 2 10 <sup>-2</sup>    |
| 2  | US                                                     | Elec. Gas                        | 35.31%      | 2.407                 | US   | Elec. Gas                              | 36.35%      | 1.205                 | US   | Elec. Gas                              | 36.60%      | 5.67 10 <sup>-1</sup> | US   | Elec. Gas                             | 37.52%      | 1.26 10 <sup>-1</sup> | US   | Elec. Gas                             | 37.55%      | 5.05 10 <sup>-2</sup> | US   | Elec. Gas                             | 36.98%      | 1.44 10 <sup>-2</sup> |
| 3  | CN                                                     | Elec. Coal                       | 7.34%       | 5 10 <sup>-1</sup>    | CN   | Elec. Coal                             | 6.04%       | 2.00 10 <sup>-1</sup> | CN   | Elec. Coal                             | 5.72%       | 8.87 10 <sup>-2</sup> | CN   | Elec. Coal                            | 4.56%       | 1.54 10 <sup>-2</sup> | CN   | Elec. Coal                            | 4.52%       | 6.08 10 <sup>-3</sup> | CN   | Elec. Coal                            | 5.24%       | 2.05 10 <sup>-3</sup> |
| 4  | CN                                                     | Iron and Steel                   | 1.64%       | 1.12 10 <sup>-1</sup> | CN   | Iron and Steel                         | 1.35%       | 4.47 10 <sup>-2</sup> | CN   | Iron and Steel                         | 1.28%       | 1.98 10 <sup>-2</sup> | CN   | Iron and Steel                        | 1.02%       | 3.43 10 <sup>-3</sup> | CN   | Iron and Steel                        | 1.01%       | 1.36 10 <sup>-3</sup> | CN   | Iron and Steel                        | 1.17%       | 4.57 10 <sup>-4</sup> |
| 5  | CN                                                     | Steam-Hot W. Sply.               | 0.69%       | 4.70 10 <sup>-2</sup> | US   | Elec. Petroleum                        | 0.58%       | 1.93 10 <sup>-2</sup> | US   | Elec. Petroleum                        | 0.59%       | 9.10 10 <sup>-3</sup> | US   | Elec. Petroleum                       | 0.60%       | 2.03 10 <sup>-3</sup> | US   | Elec. Petroleum                       | 0.60%       | 8.09 10 <sup>-4</sup> | US   | Elec. Petroleum                       | 0.59%       | 2.32 10 <sup>-4</sup> |
| 6  | US                                                     | Elec. Petroleum                  | 0.57%       | 3.86 10 <sup>-2</sup> | CN   | Steam-Hot W. Sply.                     | 0.57%       | 1.88 10 <sup>-2</sup> | CN   | Steam-Hot W. Sply.                     | 0.54%       | 8.33 10 <sup>-3</sup> | US   | Electricity by biomass and waste      | 0.55%       | 1.86 10 <sup>-3</sup> | US   | Electricity by biomass and waste      | 0.55%       | 7.41 10 <sup>-4</sup> | US   | Electricity by biomass and waste      | 0.54%       | 2.12 10 <sup>-4</sup> |
| 7  | US                                                     | Electricity by biomass and waste | 0.52%       | 3.53 10 <sup>-2</sup> | US   | Electricity by biomass and waste       | 0.53%       | 1.77 10 <sup>-2</sup> | US   | Electricity by biomass and waste       | 0.54%       | 8.33 10 <sup>-3</sup> | CN   | Steam-Hot W. Sply.                    | 0.43%       | 1.44 10 <sup>-3</sup> | CN   | Steam-Hot W. Sply.                    | 0.43%       | 5.71 10 <sup>-4</sup> | CN   | Steam-Hot W. Sply.                    | 0.49%       | 1.92 10 <sup>-4</sup> |
| 8  | CN                                                     | O. Machinery and Computers       | 0.41%       | 2.78 10 <sup>-2</sup> | CN   | O. Machinery and Computers             | 0.34%       | 1.11 10 <sup>-2</sup> | CN   | O. Machinery and Computers             | 0.32%       | 4.92 10 <sup>-3</sup> | CN   | O. Machinery and Computers            | 0.25%       | 8.52 10 <sup>-4</sup> | CN   | O. Machinery and Computers            | 0.25%       | 3.37 10 <sup>-4</sup> | CN   | O. Machinery and Computers            | 0.29%       | 1.13 10 <sup>-4</sup> |
| 9  | CN                                                     | Rubber and plastic               | 0.40%       | 2.72 10 <sup>-2</sup> | CN   | Rubber and plastic                     | 0.33%       | 1.09 10 <sup>-2</sup> | CN   | Rubber and plastic                     | 0.31%       | 4.83 10 <sup>-3</sup> | CN   | Rubber and plastic                    | 0.25%       | 8.37 10 <sup>-4</sup> | CN   | Rubber and plastic                    | 0.25%       | 3.31 10 <sup>-4</sup> | CN   | Rubber and plastic                    | 0.29%       | 1.11 10 <sup>-4</sup> |
| 10 | CN                                                     | Chemicals nec                    | 0.29%       | 1.97 10 <sup>-2</sup> | CN   | Chemicals nec                          | 0.24%       | 7.88 10 <sup>-3</sup> | CN   | Chemicals nec                          | 0.23%       | 3.49 10 <sup>-3</sup> | US   | Bituminous Coal                       | 0.21%       | 7.22 10 <sup>-4</sup> | US   | Bituminous Coal                       | 0.22%       | 2.88 10 <sup>-4</sup> | US   | Bituminous Coal                       | 0.21%       | 8.27 10 <sup>-5</sup> |
| 11 | US                                                     | Bituminous Coal                  | 0.20%       | 1.39 10 <sup>-2</sup> | US   | Bituminous Coal                        | 0.21%       | 6.91 10 <sup>-3</sup> | US   | Bituminous Coal                        | 0.21%       | 3.25 10 <sup>-3</sup> | CN   | Chemicals nec                         | 0.18%       | 6.05 10 <sup>-4</sup> | CN   | Chemicals nec                         | 0.18%       | 2.39 10 <sup>-4</sup> | CN   | Chemicals nec                         | 0.21%       | 8.06 10 <sup>-5</sup> |
| 12 | CN                                                     | Air transport services           | 0.19%       | 1.27 10 <sup>-2</sup> | CN   | Air transport services                 | 0.15%       | 5.09 10 <sup>-3</sup> | CN   | Air transport services                 | 0.15%       | 2.25 10 <sup>-3</sup> | CN   | Air transport services                | 0.12%       | 3.91 10 <sup>-4</sup> | CN   | Air transport services                | 0.12%       | 1.55 10 <sup>-4</sup> | CN   | Air transport services                | 0.13%       | 5.20 10 <sup>-5</sup> |
| 13 | CN                                                     | Bituminous Coal                  | 0.18%       | 1.24 10 <sup>-2</sup> | CN   | Bituminous Coal                        | 0.15%       | 4.95 10 <sup>-3</sup> | CN   | Bituminous Coal                        | 0.14%       | 2.19 10 <sup>-3</sup> | CN   | Bituminous Coal                       | 0.11%       | 3.81 10 <sup>-4</sup> | CN   | Bituminous Coal                       | 0.11%       | 1.51 10 <sup>-4</sup> | CN   | Bituminous Coal                       | 0.13%       | 5.07 10 <sup>-5</sup> |
| 14 | CN                                                     | Other mineral products           | 0.16%       | 1.12 10 <sup>-2</sup> | CN   | Other mineral products                 | 0.14%       | 4.47 10 <sup>-3</sup> | CN   | Other mineral products                 | 0.13%       | 1.98 10 <sup>-3</sup> | CN   | Other mineral products                | 0.10%       | 3.44 10 <sup>-4</sup> | CN   | Other mineral products                | 0.10%       | 1.36 10 <sup>-4</sup> | CN   | Other mineral products                | 0.12%       | 4.57 10 <sup>-5</sup> |
| 15 | CN                                                     | Supporting transport             | 0.12%       | 7.86 10 <sup>-3</sup> | CN   | Supporting transport                   | 0.10%       | 3.15 10 <sup>-3</sup> | US   | Transportati on services via pipelines | 0.09%       | 1.44 10 <sup>-3</sup> | US   | Transportation services via pipelines | 0.10%       | 3.20 10 <sup>-4</sup> | US   | Transportation services via pipelines | 0.10%       | 1.28 10 <sup>-4</sup> | US   | Transportation services via pipelines | 0.09%       | 3.66 10 <sup>-5</sup> |
| 16 | CN                                                     | Elec. Gas                        | 0.10%       | 6.88 10 <sup>-3</sup> | US   | Transportati on services via pipelines | 0.09%       | 3.07 10 <sup>-3</sup> | CN   | Supporting transport                   | 0.09%       | 1.39 10 <sup>-3</sup> | US   | Retail trade                          | 0.08%       | 2.70 10 <sup>-4</sup> | US   | Retail trade                          | 0.08%       | 1.08 10 <sup>-4</sup> | CN   | Supporting transport                  | 0.08%       | 3.22 10 <sup>-5</sup> |
| 17 | CN                                                     | Inland transportati on           | 0.09%       | 6.16 10 <sup>-3</sup> | CN   | Elec. Gas                              | 0.08%       | 2.75 10 <sup>-3</sup> | CN   | Elec. Gas                              | 0.08%       | 1.22 10 <sup>-3</sup> | CN   | Supporting transport                  | 0.07%       | 2.41 10 <sup>-4</sup> | CN   | Supporting transport                  | 0.07%       | 9.55 10 <sup>-5</sup> | US   | Retail trade                          | 0.08%       | 3.09 10 <sup>-5</sup> |



|    |    |                                       |       |                      |    |                       |       |                      |    |                       |       |                      |    |                       |       |                      |    |                       |       |                      |    |                       |       |                      |
|----|----|---------------------------------------|-------|----------------------|----|-----------------------|-------|----------------------|----|-----------------------|-------|----------------------|----|-----------------------|-------|----------------------|----|-----------------------|-------|----------------------|----|-----------------------|-------|----------------------|
| 18 | US | Transportation services via pipelines | 0.09% | $6.16 \cdot 10^{-3}$ | US | Retail trade          | 0.08% | $2.59 \cdot 10^{-3}$ | US | Retail trade          | 0.08% | $1.22 \cdot 10^{-3}$ | CN | Elec. Gas             | 0.06% | $2.11 \cdot 10^{-4}$ | CN | Elec. Gas             | 0.06% | $8.36 \cdot 10^{-5}$ | CN | Elec. Gas             | 0.07% | $2.81 \cdot 10^{-5}$ |
| 19 | CN | Sea transportation                    | 0.08% | $5.35 \cdot 10^{-3}$ | CN | Inland transportation | 0.07% | $2.46 \cdot 10^{-3}$ | CN | Inland transportation | 0.07% | $1.09 \cdot 10^{-3}$ | CN | Inland transportation | 0.06% | $1.89 \cdot 10^{-4}$ | CN | Inland transportation | 0.06% | $7.48 \cdot 10^{-5}$ | CN | Inland transportation | 0.06% | $2.52 \cdot 10^{-5}$ |
| 20 | US | Retail trade                          | 0.08% | $5.22 \cdot 10^{-3}$ | CN | Sea transportation    | 0.07% | $2.14 \cdot 10^{-3}$ | CN | Sea transportation    | 0.06% | $9.49 \cdot 10^{-4}$ | CN | Sea transportation    | 0.05% | $1.65 \cdot 10^{-4}$ | CN | Sea transportation    | 0.05% | $6.51 \cdot 10^{-5}$ | CN | Sea transportation    | 0.06% | $2.19 \cdot 10^{-5}$ |

f) India

Table 73: Carbon Footprint Distribution of Bitcoin mining in India per transaction by country

| Order | GWP per transaction per year (kgCO <sub>2</sub> -eqv.) |             |         |      |             |                      |      |             |                      |
|-------|--------------------------------------------------------|-------------|---------|------|-------------|----------------------|------|-------------|----------------------|
|       | 2018                                                   |             |         | 2017 |             |                      | 2016 |             |                      |
|       | C.C.                                                   | P.A.D.* (%) | GWP     | C.C. | P.A.D.* (%) | GWP                  | C.C. | P.A.D.* (%) | GWP                  |
| 1     | IN                                                     | 91.36%      | 242.034 | IN   | 93.06%      | 42.278               | IN   | 93.16%      | 13.187               |
| 2     | CN                                                     | 7.68%       | 20.355  | CN   | 6.14%       | 2.787                | CN   | 6.05%       | $8.56 \cdot 10^{-1}$ |
| 3     | WA                                                     | 0.13%       | 0.335   | WA   | 0.10%       | $4.69 \cdot 10^{-2}$ | WA   | 0.10%       | $1.45 \cdot 10^{-2}$ |
| 4     | JP                                                     | 0.13%       | 0.334   | JP   | 0.10%       | $4.6 \cdot 10^{-2}$  | JP   | 0.10%       | $1.41 \cdot 10^{-2}$ |
| 5     | US                                                     | 0.11%       | 0.280   | US   | 0.09%       | $4.01 \cdot 10^{-2}$ | US   | 0.09%       | $1.23 \cdot 10^{-2}$ |
| 6     | WM                                                     | 0.10%       | 0.272   | WM   | 0.09%       | $3.88 \cdot 10^{-2}$ | WM   | 0.09%       | $1.2 \cdot 10^{-2}$  |
| 7     | KR                                                     | 0.10%       | 0.270   | KR   | 0.08%       | $3.78 \cdot 10^{-2}$ | KR   | 0.08%       | $1.16 \cdot 10^{-2}$ |
| 8     | ID                                                     | 0.08%       | 0.203   | ID   | 0.07%       | $3.34 \cdot 10^{-2}$ | ID   | 0.07%       | $1.04 \cdot 10^{-2}$ |
| 9     | DE                                                     | 0.06%       | 0.163   | DE   | 0.05%       | $2.27 \cdot 10^{-2}$ | DE   | 0.05%       | $6.98 \cdot 10^{-3}$ |
| 10    | RU                                                     | 0.05%       | 0.136   | RU   | 0.04%       | $1.95 \cdot 10^{-2}$ | RU   | 0.04%       | $6.02 \cdot 10^{-3}$ |

Table 74: Carbon Footprint Distribution of Bitcoin mining in India per transaction by sector in Supply Chain

| O. | GWP per transaction per year (kgCO <sub>2</sub> -eqv.) |                                  |             |                      |      |                                  |             |                      |      |                                  |             |                      |
|----|--------------------------------------------------------|----------------------------------|-------------|----------------------|------|----------------------------------|-------------|----------------------|------|----------------------------------|-------------|----------------------|
|    | 2018                                                   |                                  |             |                      | 2017 |                                  |             |                      | 2016 |                                  |             |                      |
|    | C.C.                                                   | Sector                           | P.A.D.* (%) | GWP                  | C.C. | Sector                           | P.A.D.* (%) | GWP                  | C.C. | Sector                           | P.A.D.* (%) | GWP                  |
| 1  | IN                                                     | Elec. Coal                       | 86.85%      | 230.084              | IN   | Elec. Coal                       | 88.47%      | 40.192               | IN   | Elec. Coal                       | 86.85%      | 230.084              |
| 2  | CN                                                     | Elec. Coal                       | 4.38%       | 11.615               | CN   | Elec. Coal                       | 3.50%       | 1.590                | CN   | Elec. Coal                       | 4.38%       | 11.615               |
| 3  | IN                                                     | Elec. Gas                        | 3.32%       | 8.801                | IN   | Elec. Gas                        | 3.38%       | 1.537                | IN   | Elec. Gas                        | 3.32%       | 8.801                |
| 4  | CN                                                     | Iron and Steel                   | 0.98%       | 2.597                | CN   | Iron and Steel                   | 0.78%       | $3.56 \cdot 10^{-1}$ | CN   | Iron and Steel                   | 0.98%       | 2.597                |
| 5  | IN                                                     | Electricity by biomass and waste | 0.49%       | 1.308                | IN   | Electricity by biomass and waste | 0.50%       | $2.29 \cdot 10^{-1}$ | IN   | Electricity by biomass and waste | 0.49%       | 1.308                |
| 6  | IN                                                     | Bituminous Coal                  | 0.42%       | 1.122                | IN   | Bituminous Coal                  | 0.43%       | $1.96 \cdot 10^{-1}$ | IN   | Bituminous Coal                  | 0.42%       | 1.122                |
| 7  | CN                                                     | Steam-Hot W. Sply.               | 0.41%       | 1.092                | CN   | Steam-Hot W. Sply.               | 0.33%       | $1.50 \cdot 10^{-1}$ | CN   | Steam-Hot W. Sply.               | 0.41%       | 1.092                |
| 8  | CN                                                     | O. Machinery and Computers       | 0.24%       | $6.44 \cdot 10^{-1}$ | CN   | O. Machinery and Computers       | 0.19%       | $8.80 \cdot 10^{-2}$ | CN   | O. Machinery and Computers       | 0.24%       | $6.44 \cdot 10^{-1}$ |
| 9  | CN                                                     | Rubber and plastic               | 0.24%       | $6.32 \cdot 10^{-1}$ | CN   | Rubber and plastic               | 0.19%       | $8.66 \cdot 10^{-2}$ | CN   | Rubber and plastic               | 0.24%       | $6.32 \cdot 10^{-1}$ |
| 10 | CN                                                     | Chemicals nec                    | 0.17%       | $4.59 \cdot 10^{-1}$ | CN   | Chemicals nec                    | 0.14%       | $6.30 \cdot 10^{-2}$ | CN   | Chemicals nec                    | 0.17%       | $4.59 \cdot 10^{-1}$ |

|    |    |                        |       |                       |    |                        |       |                       |    |                        |       |                       |
|----|----|------------------------|-------|-----------------------|----|------------------------|-------|-----------------------|----|------------------------|-------|-----------------------|
| 11 | CN | Air transport services | 0.11% | 2.95 10 <sup>-1</sup> | CN | Air transport services | 0.09% | 4.04 10 <sup>-2</sup> | CN | Air transport services | 0.11% | 2.95 10 <sup>-1</sup> |
| 12 | CN | Bituminous Coal        | 0.11% | 2.89 10 <sup>-1</sup> | CN | Bituminous Coal        | 0.09% | 3.97 10 <sup>-2</sup> | CN | Bituminous Coal        | 0.11% | 2.89 10 <sup>-1</sup> |
| 13 | CN | Other mineral products | 0.10% | 2.60 10 <sup>-1</sup> | CN | Other mineral products | 0.08% | 3.56 10 <sup>-2</sup> | CN | Other mineral products | 0.10% | 2.60 10 <sup>-1</sup> |
| 14 | CN | Supporting transport   | 0.07% | 1.83 10 <sup>-1</sup> | IN | Coking Coal            | 0.06% | 2.93 10 <sup>-2</sup> | CN | Supporting transport   | 0.07% | 1.83 10 <sup>-1</sup> |
| 15 | IN | Coking Coal            | 0.06% | 1.68 10 <sup>-1</sup> | CN | Supporting transport   | 0.06% | 2.50 10 <sup>-2</sup> | IN | Coking Coal            | 0.06% | 1.68 10 <sup>-1</sup> |
| 16 | CN | Elec. Gas              | 0.06% | 1.60 10 <sup>-1</sup> | ID | Sub-Bituminous Coal    | 0.05% | 2.33 10 <sup>-2</sup> | CN | Elec. Gas              | 0.06% | 1.60 10 <sup>-1</sup> |
| 17 | CN | Inland transportation  | 0.05% | 1.43 10 <sup>-1</sup> | CN | Elec. Gas              | 0.05% | 2.19 10 <sup>-2</sup> | CN | Inland transportation  | 0.05% | 1.43 10 <sup>-1</sup> |
| 18 | ID | Sub-Bituminous Coal    | 0.05% | 1.34 10 <sup>-1</sup> | CN | Inland transportation  | 0.04% | 1.96 10 <sup>-2</sup> | ID | Sub-Bituminous Coal    | 0.05% | 1.34 10 <sup>-1</sup> |
| 19 | CN | Sea transportation     | 0.05% | 1.26 10 <sup>-1</sup> | IN | Elec. Petroleum        | 0.04% | 1.78 10 <sup>-2</sup> | CN | Sea transportation     | 0.05% | 1.26 10 <sup>-1</sup> |
| 20 | CN | Coke Oven              | 0.04% | 1.15 10 <sup>-1</sup> | CN | Sea transportation     | 0.04% | 1.73 10 <sup>-2</sup> | CN | Coke Oven              | 0.04% | 1.15 10 <sup>-1</sup> |

Table 75: Total Annual Carbon Footprint Distribution of Bitcoin mining in India by country

| Order | Total GWP per year (MtCO <sub>2</sub> -eqv.) |             |                       |      |             |                       |      |             |                       |
|-------|----------------------------------------------|-------------|-----------------------|------|-------------|-----------------------|------|-------------|-----------------------|
|       | 2018                                         |             |                       | 2017 |             |                       | 2016 |             |                       |
|       | C.C.                                         | P.A.D.* (%) | GWP                   | C.C. | P.A.D.* (%) | GWP                   | C.C. | P.A.D.* (%) | GWP                   |
| 1     | IN                                           | 91.36%      | 5.52 10 <sup>-2</sup> | IN   | 93.06%      | 1.11 10 <sup>-1</sup> | IN   | 93.16%      | 1.37 10 <sup>-2</sup> |
| 2     | CN                                           | 7.68%       | 4.64 10 <sup>-3</sup> | CN   | 6.14%       | 7.3 10 <sup>-3</sup>  | CN   | 6.05%       | 8.9 10 <sup>-4</sup>  |
| 3     | WA                                           | 0.13%       | 7.62 10 <sup>-5</sup> | WA   | 0.10%       | 1.23 10 <sup>-4</sup> | WA   | 0.10%       | 1.5 10 <sup>-5</sup>  |
| 4     | JP                                           | 0.13%       | 7.61 10 <sup>-5</sup> | JP   | 0.10%       | 1.2 10 <sup>-4</sup>  | JP   | 0.10%       | 1.47 10 <sup>-5</sup> |
| 5     | US                                           | 0.11%       | 6.37 10 <sup>-5</sup> | US   | 0.09%       | 1.05 10 <sup>-4</sup> | US   | 0.09%       | 1.28 10 <sup>-5</sup> |
| 6     | WM                                           | 0.10%       | 6.2 10 <sup>-5</sup>  | WM   | 0.09%       | 1.02 10 <sup>-4</sup> | WM   | 0.09%       | 1.24 10 <sup>-5</sup> |
| 7     | KR                                           | 0.10%       | 6.17 10 <sup>-5</sup> | KR   | 0.08%       | 9.89 10 <sup>-5</sup> | KR   | 0.08%       | 1.21 10 <sup>-5</sup> |
| 8     | ID                                           | 0.08%       | 4.63 10 <sup>-5</sup> | ID   | 0.07%       | 8.75 10 <sup>-5</sup> | ID   | 0.07%       | 1.08 10 <sup>-5</sup> |
| 9     | DE                                           | 0.06%       | 3.71 10 <sup>-5</sup> | DE   | 0.05%       | 5.94 10 <sup>-5</sup> | DE   | 0.05%       | 7.25 10 <sup>-6</sup> |
| 10    | RU                                           | 0.05%       | 3.1 10 <sup>-5</sup>  | RU   | 0.04%       | 5.12 10 <sup>-5</sup> | RU   | 0.04%       | 6.26 10 <sup>-6</sup> |

Table 76: Total Annual Carbon Footprint Distribution of Bitcoin mining in India by sector

| O. | Total GWP per year (MtCO <sub>2</sub> -eqv.) |                                  |             |                       |      |                                  |             |                       |      |                                  |             |                       |
|----|----------------------------------------------|----------------------------------|-------------|-----------------------|------|----------------------------------|-------------|-----------------------|------|----------------------------------|-------------|-----------------------|
|    | 2018                                         |                                  |             |                       | 2017 |                                  |             |                       | 2016 |                                  |             |                       |
|    | C.C.                                         | Sector                           | P.A.D.* (%) | GWP                   | C.C. | Sector                           | P.A.D.* (%) | GWP                   | C.C. | Sector                           | P.A.D.* (%) | GWP                   |
| 1  | IN                                           | Elec. Coal                       | 86.85%      | 5.24 10 <sup>-2</sup> | IN   | Elec. Coal                       | 88.47%      | 1.05 10 <sup>-1</sup> | IN   | Elec. Coal                       | 86.85%      | 5.24 10 <sup>-2</sup> |
| 2  | CN                                           | Elec. Coal                       | 4.38%       | 2.65 10 <sup>-3</sup> | CN   | Elec. Coal                       | 3.50%       | 4.16 10 <sup>-3</sup> | CN   | Elec. Coal                       | 4.38%       | 2.65 10 <sup>-3</sup> |
| 3  | IN                                           | Elec. Gas                        | 3.32%       | 2.01 10 <sup>-3</sup> | IN   | Elec. Gas                        | 3.38%       | 4.03 10 <sup>-3</sup> | IN   | Elec. Gas                        | 3.32%       | 2.01 10 <sup>-3</sup> |
| 4  | CN                                           | Iron and Steel                   | 0.98%       | 5.92 10 <sup>-4</sup> | CN   | Iron and Steel                   | 0.78%       | 9.31 10 <sup>-4</sup> | CN   | Iron and Steel                   | 0.98%       | 5.92 10 <sup>-4</sup> |
| 5  | IN                                           | Electricity by biomass and waste | 0.49%       | 2.98 10 <sup>-4</sup> | IN   | Electricity by biomass and waste | 0.50%       | 5.99 10 <sup>-4</sup> | IN   | Electricity by biomass and waste | 0.49%       | 2.98 10 <sup>-4</sup> |
| 6  | IN                                           | Bituminous Coal                  | 0.42%       | 2.56 10 <sup>-4</sup> | IN   | Bituminous Coal                  | 0.43%       | 5.13 10 <sup>-4</sup> | IN   | Bituminous Coal                  | 0.42%       | 2.56 10 <sup>-4</sup> |
| 7  | CN                                           | Steam-Hot W. Sply.               | 0.41%       | 2.49 10 <sup>-4</sup> | CN   | Steam-Hot W. Sply.               | 0.33%       | 3.92 10 <sup>-4</sup> | CN   | Steam-Hot W. Sply.               | 0.41%       | 2.49 10 <sup>-4</sup> |
| 8  | CN                                           | O. Machinery and Computers       | 0.24%       | 1.47 10 <sup>-4</sup> | CN   | O. Machinery and Computers       | 0.19%       | 2.31 10 <sup>-4</sup> | CN   | O. Machinery and Computers       | 0.24%       | 1.47 10 <sup>-4</sup> |

|    |    |                        |       |                       |    |                        |       |                       |    |                        |       |                       |
|----|----|------------------------|-------|-----------------------|----|------------------------|-------|-----------------------|----|------------------------|-------|-----------------------|
| 9  | CN | Rubber and plastic     | 0.24% | 1.44 10 <sup>-4</sup> | CN | Rubber and plastic     | 0.19% | 2.27 10 <sup>-4</sup> | CN | Rubber and plastic     | 0.24% | 1.44 10 <sup>-4</sup> |
| 10 | CN | Chemicals nec          | 0.17% | 1.05 10 <sup>-4</sup> | CN | Chemicals nec          | 0.14% | 1.65 10 <sup>-4</sup> | CN | Chemicals nec          | 0.17% | 1.05 10 <sup>-4</sup> |
| 11 | CN | Air transport services | 0.11% | 6.73 10 <sup>-5</sup> | CN | Air transport services | 0.09% | 1.06 10 <sup>-4</sup> | CN | Air transport services | 0.11% | 6.73 10 <sup>-5</sup> |
| 12 | CN | Bituminous Coal        | 0.11% | 6.60 10 <sup>-5</sup> | CN | Bituminous Coal        | 0.09% | 1.04 10 <sup>-4</sup> | CN | Bituminous Coal        | 0.11% | 6.60 10 <sup>-5</sup> |
| 13 | CN | Other mineral products | 0.10% | 5.93 10 <sup>-5</sup> | CN | Other mineral products | 0.08% | 9.32 10 <sup>-5</sup> | CN | Other mineral products | 0.10% | 5.93 10 <sup>-5</sup> |
| 14 | CN | Supporting transport   | 0.07% | 4.16 10 <sup>-5</sup> | IN | Coking Coal            | 0.06% | 7.67 10 <sup>-5</sup> | CN | Supporting transport   | 0.07% | 4.16 10 <sup>-5</sup> |
| 15 | IN | Coking Coal            | 0.06% | 3.82 10 <sup>-5</sup> | CN | Supporting transport   | 0.06% | 6.54 10 <sup>-5</sup> | IN | Coking Coal            | 0.06% | 3.82 10 <sup>-5</sup> |
| 16 | CN | Elec. Gas              | 0.06% | 3.64 10 <sup>-5</sup> | ID | Sub-Bituminous Coal    | 0.05% | 6.09 10 <sup>-5</sup> | CN | Elec. Gas              | 0.06% | 3.64 10 <sup>-5</sup> |
| 17 | CN | Inland transportation  | 0.05% | 3.26 10 <sup>-5</sup> | CN | Elec. Gas              | 0.05% | 5.73 10 <sup>-5</sup> | CN | Inland transportation  | 0.05% | 3.26 10 <sup>-5</sup> |
| 18 | ID | Sub-Bituminous Coal    | 0.05% | 3.05 10 <sup>-5</sup> | CN | Inland transportation  | 0.04% | 5.13 10 <sup>-5</sup> | ID | Sub-Bituminous Coal    | 0.05% | 3.05 10 <sup>-5</sup> |
| 19 | CN | Sea transportation     | 0.05% | 2.87 10 <sup>-5</sup> | IN | Elec. Petroleum        | 0.04% | 4.66 10 <sup>-5</sup> | CN | Sea transportation     | 0.05% | 2.87 10 <sup>-5</sup> |
| 20 | CN | Coke Oven              | 0.04% | 2.62 10 <sup>-5</sup> | CN | Sea transportation     | 0.04% | 4.53 10 <sup>-5</sup> | CN | Coke Oven              | 0.04% | 2.62 10 <sup>-5</sup> |

g) Sweden

Table 77: Carbon Footprint Distribution of Bitcoin mining in Sweden per transaction by country

| Order | GWP per transaction per year (kgCO <sub>2</sub> -eqv.) |             |                       |      |             |                       |
|-------|--------------------------------------------------------|-------------|-----------------------|------|-------------|-----------------------|
|       | 2017                                                   |             |                       | 2016 |             |                       |
|       | C.C.                                                   | P.A.D.* (%) | GWP                   | C.C. | P.A.D.* (%) | GWP                   |
| 1     | CN                                                     | 72.10%      | 2.798                 | CN   | 71.88%      | 8.6 10 <sup>-1</sup>  |
| 2     | SE                                                     | 9.71%       | 3.77 10 <sup>-1</sup> | SE   | 9.83%       | 1.18 10 <sup>-1</sup> |
| 3     | WA                                                     | 2.12%       | 8.23 10 <sup>-2</sup> | WA   | 2.13%       | 2.55 10 <sup>-2</sup> |
| 4     | WM                                                     | 2.04%       | 7.92 10 <sup>-2</sup> | WM   | 2.05%       | 2.46 10 <sup>-2</sup> |
| 5     | RU                                                     | 1.75%       | 6.8 10 <sup>-2</sup>  | RU   | 1.77%       | 2.11 10 <sup>-2</sup> |
| 6     | US                                                     | 1.41%       | 5.46 10 <sup>-2</sup> | US   | 1.41%       | 1.69 10 <sup>-2</sup> |
| 7     | JP                                                     | 1.33%       | 5.17 10 <sup>-2</sup> | JP   | 1.33%       | 1.59 10 <sup>-2</sup> |
| 8     | DE                                                     | 1.24%       | 4.83 10 <sup>-2</sup> | DE   | 1.25%       | 1.5 10 <sup>-2</sup>  |
| 9     | KR                                                     | 1.05%       | 4.08 10 <sup>-2</sup> | KR   | 1.05%       | 1.26 10 <sup>-2</sup> |
| 10    | IN                                                     | 0.55%       | 2.12 10 <sup>-2</sup> | IN   | 0.55%       | 6.58 10 <sup>-3</sup> |

Table 78: Carbon Footprint Distribution of Bitcoin mining in Sweden per transaction by sector in Supply Chain

| O. | GWP per transaction per year (kgCO <sub>2</sub> -eqv.) |                            |             |                       |      |                        |             |                       |
|----|--------------------------------------------------------|----------------------------|-------------|-----------------------|------|------------------------|-------------|-----------------------|
|    | 2017                                                   |                            |             |                       | 2016 |                        |             |                       |
|    | C.C.                                                   | Sector                     | P.A.D.* (%) | GWP                   | C.C. | Sector                 | P.A.D.* (%) | GWP                   |
| 1  | CN                                                     | Elec. Coal                 | 41.00%      | 1.591                 | CN   | Elec. Coal             | 40.87%      | 4.89 10 <sup>-1</sup> |
| 2  | CN                                                     | Iron and Steel             | 9.21%       | 3.57 10 <sup>-1</sup> | CN   | Iron and Steel         | 9.18%       | 1.10 10 <sup>-1</sup> |
| 3  | CN                                                     | Steam-Hot W. Sply.         | 3.86%       | 1.50 10 <sup>-1</sup> | CN   | Steam-Hot W. Sply.     | 3.85%       | 4.60 10 <sup>-2</sup> |
| 4  | SE                                                     | Electricity by hydro       | 2.27%       | 8.80 10 <sup>-2</sup> | SE   | Electricity by hydro   | 2.30%       | 2.75 10 <sup>-2</sup> |
| 5  | CN                                                     | O. Machinery and Computers | 2.26%       | 8.75 10 <sup>-2</sup> | SE   | Electricity by nuclear | 2.26%       | 2.70 10 <sup>-2</sup> |

|    |    |                              |       |                       |    |                              |       |                       |
|----|----|------------------------------|-------|-----------------------|----|------------------------------|-------|-----------------------|
| 6  | CN | Rubber and plastic           | 2.24% | 8.71 10 <sup>-2</sup> | CN | O. Machinery and Computers   | 2.25% | 2.69 10 <sup>-2</sup> |
| 7  | SE | Electricity by nuclear       | 2.23% | 8.65 10 <sup>-2</sup> | CN | Rubber and plastic           | 2.24% | 2.68 10 <sup>-2</sup> |
| 8  | CN | Chemicals nec                | 1.62% | 6.29 10 <sup>-2</sup> | CN | Chemicals nec                | 1.62% | 1.93 10 <sup>-2</sup> |
| 9  | SE | Electricity by solar thermal | 1.57% | 6.09 10 <sup>-2</sup> | SE | Electricity by solar thermal | 1.59% | 1.90 10 <sup>-2</sup> |
| 10 | CN | Air transport services       | 1.06% | 4.11 10 <sup>-2</sup> | CN | Air transport services       | 1.06% | 1.26 10 <sup>-2</sup> |
| 11 | CN | Bituminous Coal              | 1.02% | 3.95 10 <sup>-2</sup> | CN | Bituminous Coal              | 1.02% | 1.21 10 <sup>-2</sup> |
| 12 | CN | Other mineral products       | 0.93% | 3.60 10 <sup>-2</sup> | CN | Other mineral products       | 0.92% | 1.11 10 <sup>-2</sup> |
| 13 | CN | Supporting transport         | 0.65% | 2.51 10 <sup>-2</sup> | CN | Supporting transport         | 0.64% | 7.70 10 <sup>-3</sup> |
| 14 | CN | Elec. Gas                    | 0.56% | 2.19 10 <sup>-2</sup> | CN | Elec. Gas                    | 0.56% | 6.72 10 <sup>-3</sup> |
| 15 | DE | Sea transportation           | 0.51% | 1.99 10 <sup>-2</sup> | DE | Sea transportation           | 0.51% | 6.15 10 <sup>-3</sup> |
| 16 | CN | Inland transportation        | 0.51% | 1.96 10 <sup>-2</sup> | CN | Inland transportation        | 0.50% | 6.03 10 <sup>-3</sup> |
| 17 | CN | Sea transportation           | 0.50% | 1.95 10 <sup>-2</sup> | CN | Sea transportation           | 0.50% | 6.01 10 <sup>-3</sup> |
| 18 | SE | Sea transportation           | 0.44% | 1.72 10 <sup>-2</sup> | SE | Sea transportation           | 0.45% | 5.36 10 <sup>-3</sup> |
| 19 | SE | Wholesale trade              | 0.44% | 1.71 10 <sup>-2</sup> | SE | Wholesale trade              | 0.45% | 5.34 10 <sup>-3</sup> |
| 20 | WA | Sea transportation           | 0.44% | 1.69 10 <sup>-2</sup> | WA | Sea transportation           | 0.44% | 5.24 10 <sup>-3</sup> |

Table 79: Total Annual Carbon Footprint Distribution of Bitcoin mining in Sweden by country

| Order | Total GWP per year (MtCO <sub>2</sub> -eqv.) |             |                       |      |             |                       |
|-------|----------------------------------------------|-------------|-----------------------|------|-------------|-----------------------|
|       | 2017                                         |             |                       | 2016 |             |                       |
|       | C.C.                                         | P.A.D.* (%) | GWP                   | C.C. | P.A.D.* (%) | GWP                   |
| 1     | CN                                           | 72.10%      | 5.82 10 <sup>-4</sup> | CN   | 71.88%      | 2.8 10 <sup>-4</sup>  |
| 2     | SE                                           | 9.71%       | 7.84 10 <sup>-5</sup> | SE   | 9.83%       | 3.83 10 <sup>-5</sup> |
| 3     | WA                                           | 2.12%       | 1.71 10 <sup>-5</sup> | WA   | 2.13%       | 8.29 10 <sup>-6</sup> |
| 4     | WM                                           | 2.04%       | 1.65 10 <sup>-5</sup> | WM   | 2.05%       | 7.99 10 <sup>-6</sup> |
| 5     | RU                                           | 1.75%       | 1.41 10 <sup>-5</sup> | RU   | 1.77%       | 6.88 10 <sup>-6</sup> |
| 6     | US                                           | 1.41%       | 1.14 10 <sup>-5</sup> | US   | 1.41%       | 5.5 10 <sup>-6</sup>  |
| 7     | JP                                           | 1.33%       | 1.08 10 <sup>-5</sup> | JP   | 1.33%       | 5.18 10 <sup>-6</sup> |
| 8     | DE                                           | 1.24%       | 1.0 10 <sup>-5</sup>  | DE   | 1.25%       | 4.87 10 <sup>-6</sup> |
| 9     | KR                                           | 1.05%       | 8.47 10 <sup>-6</sup> | KR   | 1.05%       | 4.09 10 <sup>-6</sup> |
| 10    | IN                                           | 0.55%       | 4.41 10 <sup>-6</sup> | IN   | 0.55%       | 2.14 10 <sup>-6</sup> |

Table 80: Total Annual Carbon Footprint Distribution of Bitcoin mining in Sweden by sector

| O. | Total GWP per year (MtCO <sub>2</sub> -eqv.) |                              |             |                       |      |                              |             |                       |
|----|----------------------------------------------|------------------------------|-------------|-----------------------|------|------------------------------|-------------|-----------------------|
|    | 2017                                         |                              |             |                       | 2016 |                              |             |                       |
|    | C.C.                                         | Sector                       | P.A.D.* (%) | GWP                   | C.C. | Sector                       | P.A.D.* (%) | GWP                   |
| 1  | CN                                           | Elec. Coal                   | 41%         | 3.31 10 <sup>-4</sup> | CN   | Elec. Coal                   | 40.87%      | 1.59 10 <sup>-4</sup> |
| 2  | CN                                           | Iron and Steel               | 9.21%       | 7.43 10 <sup>-5</sup> | CN   | Iron and Steel               | 9.18%       | 3.58 10 <sup>-5</sup> |
| 3  | CN                                           | Steam-Hot W. Sply.           | 3.86%       | 3.11 10 <sup>-5</sup> | CN   | Steam-Hot W. Sply.           | 3.85%       | 1.50 10 <sup>-5</sup> |
| 4  | SE                                           | Electricity by hydro         | 2.27%       | 1.83 10 <sup>-5</sup> | SE   | Electricity by hydro         | 2.30%       | 8.94 10 <sup>-6</sup> |
| 5  | CN                                           | O. Machinery and Computers   | 2.26%       | 1.82 10 <sup>-5</sup> | SE   | Electricity by nuclear       | 2.26%       | 8.78 10 <sup>-6</sup> |
| 6  | CN                                           | Rubber and plastic           | 2.24%       | 1.81 10 <sup>-5</sup> | CN   | O. Machinery and Computers   | 2.25%       | 8.75 10 <sup>-6</sup> |
| 7  | SE                                           | Electricity by nuclear       | 2.23%       | 1.80 10 <sup>-5</sup> | CN   | Rubber and plastic           | 2.24%       | 8.71 10 <sup>-6</sup> |
| 8  | CN                                           | Chemicals nec                | 1.62%       | 1.31 10 <sup>-5</sup> | CN   | Chemicals nec                | 1.62%       | 6.29 10 <sup>-6</sup> |
| 9  | SE                                           | Electricity by solar thermal | 1.57%       | 1.27 10 <sup>-5</sup> | SE   | Electricity by solar thermal | 1.59%       | 6.18 10 <sup>-6</sup> |
| 10 | CN                                           | Air transport services       | 1.06%       | 8.54 10 <sup>-6</sup> | CN   | Air transport services       | 1.06%       | 4.11 10 <sup>-6</sup> |
| 11 | CN                                           | Bituminous Coal              | 1.02%       | 8.22 10 <sup>-6</sup> | CN   | Bituminous Coal              | 1.02%       | 3.95 10 <sup>-6</sup> |
| 12 | CN                                           | Other mineral products       | 0.93%       | 7.48 10 <sup>-6</sup> | CN   | Other mineral products       | 0.92%       | 3.60 10 <sup>-6</sup> |
| 13 | CN                                           | Supporting transport         | 0.65%       | 5.21 10 <sup>-6</sup> | CN   | Supporting transport         | 0.64%       | 2.51 10 <sup>-6</sup> |
| 14 | CN                                           | Elec. Gas                    | 0.56%       | 4.55 10 <sup>-6</sup> | CN   | Elec. Gas                    | 0.56%       | 2.19 10 <sup>-6</sup> |
| 15 | DE                                           | Sea transportation           | 0.51%       | 4.14 10 <sup>-6</sup> | DE   | Sea transportation           | 0.51%       | 2.00 10 <sup>-6</sup> |
| 16 | CN                                           | Inland transportation        | 0.51%       | 4.08 10 <sup>-6</sup> | CN   | Inland transportation        | 0.50%       | 1.96 10 <sup>-6</sup> |
| 17 | CN                                           | Sea transportation           | 0.50%       | 4.06 10 <sup>-6</sup> | CN   | Sea transportation           | 0.50%       | 1.96 10 <sup>-6</sup> |
| 18 | SE                                           | Sea transportation           | 0.44%       | 3.57 10 <sup>-6</sup> | SE   | Sea transportation           | 0.45%       | 1.74 10 <sup>-6</sup> |
| 19 | SE                                           | Wholesale trade              | 0.44%       | 3.56 10 <sup>-6</sup> | SE   | Wholesale trade              | 0.45%       | 1.74 10 <sup>-6</sup> |
| 20 | WA                                           | Sea transportation           | 0.44%       | 3.51 10 <sup>-6</sup> | WA   | Sea transportation           | 0.44%       | 1.71 10 <sup>-6</sup> |





# References

1. Org, S. U. *TRANSFORMING OUR WORLD: THE 2030 AGENDA FOR SUSTAINABLE DEVELOPMENT UNITED NATIONS UNITED NATIONS TRANSFORMING OUR WORLD: THE 2030 AGENDA FOR SUSTAINABLE DEVELOPMENT*.  
[https://sustainabledevelopment.un.org/content/documents/21252030 Agenda for Sustainable Development web.pdf](https://sustainabledevelopment.un.org/content/documents/21252030%20Agenda%20for%20Sustainable%20Development%20web.pdf).
2. Cryptocurrencies and Blockchain technology: reshaping the future of the financial world.  
<https://www.finextra.com/blogposting/15386/cryptocurrencies-and-Blockchain-technology-reshaping-the-future-of-the-financial-world>.
3. Bitcoin jumps 8% to \$60,000 after Fed keeps policy steady and Morgan Stanley offers crypto funds | Currency News | Financial and Business News | Markets Insider.  
<https://markets.businessinsider.com/currencies/news/Bitcoin-btc-price-federal-reserve-morgan-stanley-ether-eth-cryptocurrencies-2021-3-1030223360>.
4. Bitcoin (BTC USD) Price, News, Quotes: JPMorgan Sees \$146,000-Plus Target - Bloomberg.  
<https://www.bloomberg.com/news/articles/2021-01-05/jpmorgan-sees-146-000-plus-Bitcoin-price-as-long-term-target>.
5. Nakamoto, S. *Bitcoin: A peer-to-peer electronic cash system*. (2019).
6. Bitcoin market cap 2013-2021 | Statista. (2013).
7. Bitcoin - Open source P2P money. <https://Bitcoin.org/en/>.
8. Bendiksen, C., Gibbons, S. & Lim, E. The Bitcoin mining network-trends, marginal creation cost, electricity consumption & sources. *CoinShares Res.* **21**, 3–19 (2018).
9. Köhler, S. & Pizzol, M. Life Cycle Assessment of Bitcoin Mining. *Environ. Sci. Technol.* **53**, 13598–13606 (2019).
10. Mora, C. *et al.* Bitcoin emissions alone could push global warming above 2 C. *Nat. Clim. Chang.* **8**, 931–933 (2018).
11. Bitcoin, W. Mining hardware comparison - Bitcoin Wiki. (2014).
12. Bitmain Antminer R4 profitability | ASIC Miner Value.  
<https://www.asicminervalue.com/miners/bitmain/antminer-r4>.
13. De Vries, A. Bitcoin's growing energy problem. *Joule* **2**, 801–805 (2018).
14. Exiobase - Home. <https://www.exiobase.eu/>.
15. Stadler, K., Wood, R., Bulavskaya, T., Södersten, C. J. & Tukker, A. E. 3: Developing a 455 Time Series of Detailed Environmentally Extended Multi-Regional Input-Output Tables: 456 EXIOBASE 3. *J. Ind. Ecol.* **457**, (2018).
16. China, electricity statistics 2019. 2019 electricity & other energy statistics (preliminary). (2020).
17. IEA, D. & S.-. Data & Statistics - IEA. (2017).
18. Electricity prices around the world | GlobalPetrolPrices.com.  
[https://www.globalpetrolprices.com/electricity\\_prices/](https://www.globalpetrolprices.com/electricity_prices/).
19. • Electricity prices by country 2020 | Statista.  
<https://www.statista.com/statistics/263492/electricity-prices-in-selected-countries/>.
20. United, nations climate change. Global Warming Potentials (IPCC Second Assessment Report) | UNFCCC. (2020).
21. U.S., E. I. A. U.S. Energy Information Administration (EIA). (2018).
22. Dudley, B. & others. BP statistical review of world energy 2016. *London, UK* (2015).
23. International, E. A. (IEA). eorgia, Total Primary Energy Supply (TPES) by source. (2018).
24. Iceland, M. Does Iceland really produce all of its electricity from renewables? (2019).



25. Schmidt, S. *et al.* Understanding GHG emissions from Swedish consumption-Current challenges in reaching the generational goal. *J. Clean. Prod.* **212**, 428–437 (2019).
26. 2019 rekordår för svensk elproduktion. <https://www.energimyndigheten.se/nyhetsarkiv/2020/2019-rekordar-for-svensk-elproduktion/>.
27. Bitcoin Energy Consumption Index - Digiconomist. <https://digiconomist.net/Bitcoin-energy-consumption>.
28. bp. *bp Statistical Review of World Energy 2020*. [www.bp.com/statisticalreview](http://www.bp.com/statisticalreview).
29. BP. *Full report – BP Statistical Review of World Energy 2019*.
30. (No Title). <https://observatorio.osinergmin.gob.pe/produccion-tipo-combustible>.
31. 45.3 TWh of electricity produced in 2017 - Bulgaria, 8 January 2018 - Balkan Energy. <http://balkanenergy.com/45-3-twh-electricity-produced-2017-bulgaria-8-january-2018/>.
32. Godisnji Izveštaj O Nacionalnom Rezidualnom miksu : EMS : Free Download, Borrow, and Streaming : Internet Archive. [https://archive.org/details/godisnjiizvestajonacionalnom/Godisnji\\_izvestaj\\_o\\_nacionalnom\\_rezidualnom\\_miksu\\_2017/page/n5/mode/2up](https://archive.org/details/godisnjiizvestajonacionalnom/Godisnji_izvestaj_o_nacionalnom_rezidualnom_miksu_2017/page/n5/mode/2up).
33. Libya Energy Profile. [https://www.indexmundi.com/libya/energy\\_profile.html](https://www.indexmundi.com/libya/energy_profile.html).
34. Wind covers 43.6% of Denmark's 2017 power demand. <https://renewablesnow.com/news/wind-covers-436-of-denmarks-2017-power-demand-596488/>.
35. Electricity Production Data | World Electricity Statistics | Enerdata. <https://yearbook.enerdata.net/electricity/world-electricity-production-statistics.html>.
36. International Energy Statistics - EIA. <https://archive.ph/20141024224650/http://tonto.eia.doe.gov/cfapps/ipdbproject/iedindex3.cfm?tid=2&pid=2&aid=12&cid=&syid=2007&eyid=2012&unit=BKWH>.
37. Bosnia's net electricity production at 14,472 GWh in 2017. <https://seenews.com/news/bosnias-net-electricity-production-at-14472-gwh-in-2017-605815>.
38. Rapport annuel 2017. [https://www.cie.ci/ebook/rapport\\_annuel\\_CIE\\_2017/](https://www.cie.ci/ebook/rapport_annuel_CIE_2017/).
39. IEA - Report. <https://web.archive.org/web/20180811133300/https://www.iea.org/statistics/statisticssearch/report/?country=Kenya&product=electricityandheat>.
40. In Armenia, the generation of electricity in 2017 increased by 6.1% per annum | Finport.am. [https://finport.am/full\\_news.php?id=33331&lang=3](https://finport.am/full_news.php?id=33331&lang=3).
41. Kosovo's gross power output falls 9.8% in 2017. <https://renewablesnow.com/news/kosovos-gross-power-output-falls-98-in-2017-601861/>.
42. *Mongolia*. <https://eneken.iecej.or.jp/data/7391.pdf>.
43. Albania's electricity imports soar in 2017 as domestic output falls | Reuters. <https://www.reuters.com/article/albania-electricity/albanias-electricity-imports-soar-in-2017-as-domestic-output-falls-idUSL5N1QP6AG>.
44. Senegal. <http://www.senelec.sn/wp-content/uploads/2019/03/Rapport-Annuel-Senelec-2017.pdf>.
45. (No Title). [https://nso.gov.mt/en/News\\_Releases/View\\_by\\_Unit/Unit\\_B3/Environment\\_Energy\\_Transport\\_and\\_Agriculture\\_Statistics/Documents/2017/News2017\\_163.pdf](https://nso.gov.mt/en/News_Releases/View_by_Unit/Unit_B3/Environment_Energy_Transport_and_Agriculture_Statistics/Documents/2017/News2017_163.pdf).
46. Electricity – production - The World Factbook. <https://www.cia.gov/the-world-factbook/field/electricity-production/country-comparison>.
